# Supplementary material for: Comparative genomic analysis of SET domain family reveals the origin, expansion, and putative function of the arthropod-specific SmydA genes as histone modifiers in insects
Source: PubMed Central journal article supplement (PMC5459927; doi:10.1093/gigascience/gix031), 2017-04-22

1 Dear Editor,  
2

3 Thank you for your organizing the review for our manuscript (by Jiang et al. MS#  
4 GIGA-D-16-00127). Also, we appreciate the two reviewer's constructive suggestions  
5 and comments which largely improved the quality and presentation of this manuscript.  
6 Here, I submitted the revised manuscript and answered all questions raised by the  
7 reviewers in a point-by-point manner. We believe that the revised manuscript has  
8 been substantially improved in terms of data retrieval and presentation. Please let me  
9 know if you have any further question.  
10  
11  
12  
13  
14  
15  
16  
17  
18  
19  
20  
21  
22  
23  
24

25 Best regards,  
26

27 Le Kang, Ph.D. and Professor  
28

29 Institute of Zoology, Chinese Academy of Sciences  
30

31 Beijing 100101, China  
32

33 Tel: 86-10-6480-7219  
34

35 Fax:86-10-6480-7099  
36

37 E-mail: lkang@ioz.ac.cn  
38  
39  
40  
41  
42  
43  
44  
45  
46  
47  
48  
49  
50  
51  
52  
53  
54  
55  
56  
57  
58  
59  
60  
61  
62  
63  
64  
65

## Response to the Reviewers

**Explanation: All editorial correspondence from *Gigascience*, including the reviewers' comments, is verbatim in black. Our responses are inserted directly into this text in blue. All changes have been implemented in the final version of the manuscript.**

GIGA-D-16-00127

Comparative genomic analysis of SET-domain family reveals the origin, expansion, and putative function of the arthropod-specific SmydA genes as histone modifier in insects

Feng Jiang; Qing Liu; Yanli Wang; Jie Zhang; Huimin Wang; Tianqi Song; Meiling Yang; Xianhui Wang; Le Kang

GigaScience

Dear Prof Kang,

Your manuscript "Comparative genomic analysis of SET-domain family reveals the origin, expansion, and putative function of the arthropod-specific SmydA genes as histone modifier in insects" (GIGA-D-16-00127) has been assessed by our reviewers. We are unable to consider it for publication in its current form, but we would be willing to send a revised manuscript for re-review, if you are able to fully address the comments below.

The reviewers have raised a number of important points (see below), and we can not make a decision on the manuscript unless those comments are fully addressed in a revised manuscript.

In particular, you need to be more precise with respect to your methods and justify better your analysis decisions (e.g. with respect to inclusion/exclusion criteria etc - see the referees' reports).

1  
2  
3  
4  
5  
6  
7  
8  
9  
10  
11  
12  
13  
14  
15  
16  
17  
18  
19  
20  
21  
22  
23  
24  
25  
26  
27  
28  
29  
30  
31  
32  
33  
34  
35  
36  
37  
38  
39  
40  
41  
42  
43  
44  
45  
46  
47  
48  
49  
50  
51  
52  
53  
54  
55  
56  
57  
58  
59  
60  
61  
62  
63  
64  
65

**Response:**

We have addressed the reviewer's comments specifically and mention below how the text changed as a consequence.

In addition to the two reports below, we have discussed the paper with another expert adviser, who unfortunately was not able to complete a full report. But from this discussion with a third expert we draw another set of comments that we ask you to address:

We feel you need to concentrate more on one major question in the introduction. You mention subfunctionalisation, epigenetic protein modification, and evolution of SET domain containing genes. This seems a bit convoluted, and we feel it needs better emphasis. We are also not sure how conclusive the RNAi experiments are in respect to the function of these genes - this will need more details and better justification.

**Response:**

The primary results show that the evolution novelty of *SET* domain containing genes is linked to the insect phenotypic plasticity by putative histone modification. Therefore, we deleted the following sentences regarding to subfunctionalisation to emphasis the importance of the other two aspects:

“In taxonomically related species, the expansion of conserved gene families through gene duplication is widespread in metazoan genomes [4]. Gene duplication may increase species fitness by subfunctionalization or neofunctionalization [5, 6]. Subfunctionalization results in the symmetric division of the functional capability of the original gene among the duplicated genes [7]. Neofunctionalization allows the original copy to maintain its function and permits the new copy to diverge under relaxed selective constraints or positive selection for a novel function.”

Essential genes are often considered as conserved and functionally important, whereas

1 pseudogenes have been considered to be more dispensable and to have minor  
2 influences on survival and phenotype. Knockdown or knockout of essential gene (for  
3 example, DNA cytosine-5-methyltransferases in honeybees and histone  
4 methyltransferase G9a in mice) expression often result in lethal phenotype. Therefore,  
5 the point that no pseudogenization for *SmydA-2* in locusts could be supported by the  
6 RNAi experiments in this study. Accordingly, we added the following sentence to  
7 achieve a better justification:  
8  
9

10  
11 “Essential genes are often considered as conserved and functionally important [29],  
12 whereas pseudogenes have been considered to be more dispensable and to have minor  
13 influences on survival and phenotype.”  
14  
15

16  
17  
18  
19  
20  
21  
22  
23  
24  
25  
26  
27  
28  
29  
30  
31  
32  
33  
34  
35  
36  
37  
38  
39  
40  
41  
42  
43  
44  
45  
46  
47  
48  
49  
50  
51  
52  
53  
54  
55  
56  
57  
58  
59  
60  
61  
62  
63  
64  
65

References:

Krylov DM, Wolf YI, Rogozin IB, Koonin EV: Gene loss, protein sequence divergence, gene dispensability, expression level, and interactivity are correlated in eukaryotic evolution. *Genome Res* 2003, 13(10):2229-2235.

Miklos GL, Rubin GM: The role of the genome project in determining gene function: insights from model organisms. *Cell* 1996, 86(4):521-529.

Kucharski R, Maleszka J, Foret S, Maleszka R: Nutritional control of reproductive status in honeybees via DNA methylation. *Science* 2008, 319(5871):1827-1830.

Tachibana M, Sugimoto K, Nozaki M, Ueda J, Ohta T, Ohki M, Fukuda M, Takeda N, Niida H, Kato H et al: G9a histone methyltransferase plays a dominant role in euchromatic histone H3 lysine 9 methylation and is essential for early embryogenesis. *Genes & development* 2002, 16(14):1779-1791.

In the main manuscript, please also clarify how gene gain was inferred ( Fig. 2) and mention the method used for optimising character changes. The expert who has advised us on the paper also relayed the following comment, that we also ask you to

1 address:

2 **Response:**

3  
4 We consider only the binary state, presence or absence, of a given *SET* homologous  
5 group in any given node. The member number of *SET* homologous group in each  
6 species was not considered. Ancestral state reconstruction was implemented in the  
7 Mesquite program under maximum likelihood optimization using Markov k-state 1  
8 parameter model in which forward and backward transition rates are equal. After  
9 ancestral reconstruction, we measured gain (emergence) and loss events of *SET*  
10 homologous group along each branch in the phylogenetic tree. The gain event of *SET*  
11 homologous group was defined as the *SET* homologous group was absent at the  
12 ancestral nodes of a given node and either of the outgroups.  
13  
14  
15  
16  
17  
18  
19  
20  
21  
22  
23  
24

25 To improve clarity, we revised the following sentences in the Method section:

26  
27 “We constructed a character matrix that represents present/absent states for each *SET*  
28 homologous group to reconstruct the ancestral states of interior clades. We did not  
29 consider member number variation and considered only the binary state, presence or  
30 absence, of a given *SET* homologous group in any given node.”  
31  
32  
33  
34  
35  
36

37  
38 “Ancestral state reconstruction was implemented in the Mesquite program  
39 (<http://mesquiteproject.org/>) under maximum likelihood optimization using Markov  
40 k-state 1 parameter model. After ancestral reconstruction, we measured emergence  
41 and loss events of *SET* homologous group along each branch in the phylogenetic tree.  
42 The emergence event of *SET* homologous group was defined as the *SET* homologous  
43 group was absent at the ancestral nodes of a given node and either of the outgroups”  
44  
45  
46  
47  
48  
49  
50  
51

52 "How can we be certain of the absence of these genes in some taxa, given the great  
53 divergence and possible lack of similarity to the HMM used to detect the genes in the  
54 first place?"  
55  
56

57 **Response:**

58  
59 *SET* domain, which is necessary for many histone lysine methyltransferases,  
60  
61  
62  
63  
64  
65

1 possesses a catalytic activity that transfers a methyl group to the amino group of  
2 lysine residues of nuclear histones from S-adenosyl-L-methionine. Therefore, the  
3 detection of *SET* domain provides an efficient way to identify histone lysine  
4 methyltransferase. HMM-based searching performs much better than pairwise  
5 methods (for example BLAST), and it is amongst the most successful approaches for  
6 detecting REMOTE HOMOLOGY (divergent homologs) between proteins. We  
7 detected the *SET* domains of the seven major conserved groups in the arthropod  
8 species, which are diverged from each other hundreds of million years ago, suggesting  
9 that HMM-based searching is competent for divergent homolog identification.  
10 Whether a *SET* domain lacking of sequence similarity (rapid evolving or  
11 pseudogenaztion) to known *SET* domain homologs retain histone lysine methylation  
12 activities is still an open question, but this is an issue beyond the scope of this study.  
13 Hope the matter is satisfactory.

#### References:

31 Madera M, Gough J: A comparison of profile hidden Markov model procedures for  
32 remote homology detection. *Nucleic Acids Res* 2002, 30(19):4321-4328.

37 Please also make an effort to present your work shorter, but with greater precision,  
38 also with respect to figure legends. (for example Fig. 1:, to cite our adviser: "What  
39 are the long lines after each terminal? How are the terminals were chosen, given  
40 there are thousands of gene sequences, and how they were categorized (based on the  
41 tree or some assignment done by an external analysis?")

#### Response:

50 To improve preciseness and clearness, we provided much more detailed descriptions  
51 of both the figure legends in the three Figures and the Methods section in the main  
52 text. The length of the grey long line after each terminal is directly proportional to the  
53 length of the corresponding *SET* gene. As noted in the figure legend of Figure 1, the  
54 terminals were chosen based on the following criteria; One representative is elected  
55 for each order. They were categorized based on a phylogenetic tree using Bayesian

1 inference analysis of protein sequences of *SET* genes.

2 In response, we added the following sentence in the figure legend of Figure 1:

3  
4 “The length of the grey long line after each terminal is directly proportional to the  
5 length of the corresponding *SET* gene.”  
6  
7

8  
9  
10 Please also mention the sources of all original data you use, including accession  
11 numbers and, if possible, accession date. Further material that can help reproducibility,  
12 such as custom scripts, intermediate results, supplementary data, software outputs etc,  
13 can be uploaded to our server GigaDB. You are also welcome to use protocols.io  
14 (<https://www.protocols.io/>) as a convenient way to share methods and protocols.  
15  
16  
17  
18  
19

20  
21 **Response:**

22  
23 Dr, Scott Edmunds, the executive editor of *GigaScience*, asked us to upload all the  
24 required files to server GigaDB several days later after the initial submission. Here are  
25 the lists for the files we have uploaded to GigaDB. Please see the full email  
26 correspondence at the bottom of this document for further information.  
27  
28  
29  
30

- 31  
32  
33 1) All the sequences files for SET genes in this study: 1.allSETgeneSequence.tar.gz  
34  
35 2) The alignment based and non-alignment based phylogeny trees and the MAFFT  
36 alignment file in the Figure 1: 2.PhylogeneticTreeSETgenes.tar.gz  
37  
38 3) The BUSCO-based “species tree” which is used for phylogeny inference of insect  
39 orders in the Figure 2: 3.BUSCOSpeciesTree.tar.gz  
40  
41 4) The MAFFT alignment file for BUSCO-based single-copy genes:  
42 4.BUSCOalignment.tar.gz  
43  
44 5) HMMER output file for SET domain identification: 5.HMMERout.tar.gz  
45  
46 6) PSILC program output file: 6.PSILCoutput.tar.gz  
47  
48 7) InterProScan output file: 7.InterProScanoutput.tar.gz  
49  
50 8) The phylogeny trees include in the supplementary files (in Newick format): 8.  
51 PhylogenyTreesinSupplyFiles.tar.gz  
52  
53 9) The improved gene models using transcriptome data:  
54 9.RevisedGeneModels.tar.gz  
55  
56  
57  
58  
59  
60  
61  
62  
63  
64  
65

1  
2 The reports, together with any other comments, are below. Please also take a moment  
3  
4 to check our website at <http://giga.edmgr.com/> for any additional comments that were  
5  
6 saved as attachments.  
7

8  
9 If you are able to fully address these points, we would encourage you to submit a  
10  
11 revised manuscript to GigaScience. Once you have made the necessary corrections,  
12  
13 please submit online at:

14  
15 <http://giga.edmgr.com/>

16  
17 If you have forgotten your username or password please use the "Send Login Details"  
18  
19 link to get your login information. For security reasons, your password will be reset.  
20

21 Please include a point-by-point within the 'Response to Reviewers' box in the  
22  
23 submission system. Please ensure you describe additional experiments that were  
24  
25 carried out and include a detailed rebuttal of any criticisms or requested revisions that  
26  
27 you disagreed with. Please also ensure that your revised manuscript conforms to the  
28  
29 journal style, which can be found in the Instructions for Authors on the journal  
30  
31 homepage.  
32

33 The due date for submitting the revised version of your article is 19 Apr 2017.

34  
35 I look forward to receiving your revised manuscript soon.  
36

37 Best wishes,

38  
39 Hans Zauner

40  
41 GigaScience

42  
43 [www.gigasciencejournal.com](http://www.gigasciencejournal.com)  
44  
45  
46

47  
48 Reviewer reports:  
49  
50

51  
52 Reviewer #2: This manuscript describes an in-depth analysis of the SET genes in  
53  
54 arthropod species, with a particular interest in the Smyd class which includes both  
55  
56 widely conserved and arthropod-specific members. It is of special interest that the  
57  
58 authors make an effort to combine high throughput bioinformatic analyses with an  
59  
60 experimental approach to prove that arthropod-specific Smyd proteins retain histone  
61  
62  
63  
64  
65



1 modification activity and are differentially expressed in phenotypically different  
2 individuals of the same species. The work is well suited for the GigaScience journal,  
3  
4 but in the opinion of this reviewer some questions should be addressed.  
5

6 **Response:**

7  
8 We really appreciate the positive responses from the reviewer.  
9

10  
11  
12 1. The introduction gives a description of the molecular function of SET  
13 domain-containing proteins as histone modification enzymes, but does not discuss  
14 already published data on Smyd gene evolution. Given the special emphasis on Smyd  
15 genes, it would be convenient to mention previous publications giving a classification  
16 of Smyd genes in vertebrates and invertebrates. The article published by Calpena et al  
17 (PlosOne 2015) is of particular relevance, since the authors introduce the main Smyd  
18 classes: Smyd3, which includes the vertebrate Smyd1 and 2; Smyd 4, which is  
19 expanded in arthropods; Smyd 5; and the arthropod-specific SmydA. Based on this  
20 evidence, they introduce some of the nomenclature used in this manuscript (Smyd4-1  
21 to 4, SmydA-1 to 9). The manuscript under review makes a more detailed analysis of  
22 Set genes in several arthropod species, but giving due credit to previous work does  
23 not diminish the merit of theirs. On the contrary, it provides a framework in which to  
24 give a richer discussion of their own results.  
25  
26  
27  
28  
29  
30  
31  
32  
33  
34  
35  
36  
37  
38

39 **Response:**

40  
41 Thanks for this suggestions and we accepted this criticism thoughtfully. In response,  
42 we added the following sentences in the revision:  
43  
44

45  
46  
47 “A recent study has provided a framework for understanding the evolution history of  
48 SMYD gene family in representative animal phyla [24]. The phylogenetic results  
49 show that the metazoan SMYD genes can be classified in three main classes, *Smyd3*,  
50 *Smyd5* and *Smyd4*. Two sub-classes of SMYD genes, namely *Smyd4-4* and *SmydA*,  
51 are absent in vertebrates; the former one is insect-specific and the later one is  
52 arthropod-specific. Within Chelicerata, we detected *Smyd4-4* in Acariform mites  
53 (non-insect arthropods), suggesting our evidence did not support the point that  
54  
55  
56  
57  
58  
59  
60  
61  
62  
63  
64  
65

1 Smyd4-4 is specific of insects. Since Chelicerata represents an out-group branch for  
2 this study, further studies covering more basal branches of arthropod phylogeny are  
3 required to ascertain the origin of *Smyd4-4*.”  
4  
5  
6

7  
8  
9 2. In pages 6 and 7 it is described how the sequences were selected and the overall  
10 distribution of set genes in arthropods. Bearing in mind that the process of sequence  
11 inclusion/exclusion is very complicated in such a diverse family, the authors must  
12 discuss how this may have affected their analysis. This discussion is relevant on the  
13 light of the apparent contradictions indicated below (points 8-10).  
14  
15  
16  
17

18 **Response:**

19 There are no contradictions and inconsistencies regarding to this issue in the original  
20 manuscript. Please see the explanations below for the points 8-10. This issue is not  
21 raised by sequence inclusion/exclusion.  
22  
23  
24  
25  
26  
27

28  
29 We appreciated this good comment that has led us to revisit our thinking of an  
30 important but easily neglected point of this study and emphasize the importance of  
31 sequence inclusion/exclusion in this study. *SET* domain possesses a catalytic activity  
32 that transfers a methyl group to the amino group of lysine residues of nuclear histones  
33 from S-adenosyl-L-methionine. Therefore, *SET* domain is necessary for many histone  
34 lysine methyltransferases. During the course of evolution, a few cases of conserved  
35 genes have lost some core domains, which are crucial for their gene functions. The  
36 loss of crucial domain usually abolishes its gene function. For example, the *SET*  
37 domain in *Smyd3* could be identified both in vertebrates and in invertebrates. It has  
38 been experimentally validated that the human *Smyd3* showed histone H3-K4  
39 methyltransferase activity, in consistent with the presence of *SET* domain in *Smyd3* in  
40 human. We failed to detect the *SET* domain in *Smyd3* in all the *Drosophila* species  
41 even under a less stringent criterion of e-value cut-off. However, the *SET* domain in  
42 *Smyd3* could be identified in a large number of insects and in *Anopheles gambiae*,  
43 which is in the same order of *Drosophila*. This indicates that *SET* domain has  
44 specifically lost in *Drosophila* species, implying that *Smyd3* in *Drosophila* species  
45  
46  
47  
48  
49  
50  
51  
52  
53  
54  
55  
56  
57  
58  
59  
60  
61  
62  
63  
64  
65

1 may deprived of histone methylation activity. Indeed, no experimental evidence for  
2 histone methylation capacity for *Smyd3* has been reported in *Drosophila* so far.  
3  
4 Because our study focuses on histone lysine methyltransferases which are by means  
5 of *SET* domain, the genes lacking *SET* domain ( even though the *SET* domain can be  
6 detected in their homologs in closely related species) were excluded for further  
7 analysis in this study.  
8  
9

10  
11  
12 To make this point clear to the readers, we added the following sentences in the main  
13 text:  
14

15 “Despite that the *SET* domain can be detected in their homologs in closely related  
16 species, the genes lacking *SET* domain were considered as deprived of lysine  
17 methylation capacity and were excluded for further analysis.”  
18  
19  
20  
21  
22  
23  
24  
25  
26  
27  
28

29 **References:**  
30

31 Hamamoto R, Furukawa Y, Morita M, Iimura Y, Silva FP, Li M, Yagyu R, Nakamura  
32 Y: SMYD3 encodes a histone methyltransferase involved in the proliferation of  
33 cancer cells. Nat Cell Biol 2004, 6(8):731-740.  
34  
35  
36  
37  
38  
39  
40

41 3. In pages 7 and 8 and in Figure 1 the phylogeny of Set genes is described. Two  
42 methods are used, alignment-based Bayesian and alignment-free, and the authors state  
43 that both gave similar topologies. In Figure 1, only the first tree is shown, it would be  
44 convenient to show the other phylogeny in a supplementary figure.  
45  
46  
47  
48  
49

50 **Response:**  
51

52 Thanks for this comment. We uploaded both the alignment based and non-alignment  
53 based phylogeny trees (in Newick format) in the Figure 1 to the publicly accessible  
54 database GigaDB. In addition, we also uploaded the MAFFT alignment file to  
55 GigaDB.  
56  
57  
58  
59  
60  
61  
62  
63  
64  
65

1 4. In Figure 1 there are two color codes, one for domains outside the circle and one  
2 for the Set gene classes, but the second one is not mentioned in the figure legend. The  
3 black branches must be the arthropod-specific genes. Is that so?  
4  
5

6 **Response:**  
7

8 Yes, the black branches indicate the *SET* genes which cannot be classified into the  
9 seven major conserved groups, suggesting their arthropod origin. To improve clarity,  
10 we added the following sentences into the figure legend:  
11  
12  
13

14 “The branch colors of the phylogenetic tree indicate the established SET gene  
15 classification which divides *SET* genes into seven major conserved groups, namely:  
16 Suv, Ash, Trx, E(z), PRDM, SMYD, and SETD. The *SET* genes labeled in black  
17 branches cannot be classified into the seven major conserved groups, suggesting their  
18 arthropod origin.”  
19  
20  
21  
22  
23  
24  
25  
26  
27

28 5. At this point it should be mentioned in the main text that this branch corresponds to  
29 the already defined SmydA class.  
30  
31

32 **Response:**  
33

34 Thanks for this comment. The *SET* genes labeled in black branches include both the  
35 defined *SmydA* genes and the unclassified *SET* genes which show patchy distributed  
36 patterns across arthropod species. In order to achieve preciseness, we added the  
37 following sentence in the main text:  
38  
39  
40  
41  
42

43 “Indeed, a large number of these *SET* genes are homologous to the already defined  
44 arthropod-specific *SmydA* genes described in the previous study [28].”  
45  
46  
47  
48

49 **References:**  
50

51 Calpena E, Palau F, Espinos C, Galindo MI: Evolutionary History of the Smyd Gene  
52 Family in Metazoans: A Framework to Identify the Orthologs of Human Smyd Genes  
53 in *Drosophila* and Other Animal Species. *PLoS One* 2015, 10(7):e0134106.  
54  
55  
56  
57  
58

59 6. From line 177 onwards the term "set homologous group" is used, but it is not  
60  
61  
62  
63  
64  
65

1 defined. My guess is that the 19 homologous groups mentioned in line 185 are the  
2 ones in Figure 1B, taking Smyd4-1 to Smyd4-4 as one group. The authors should  
3 define clearly what they call a set homologous group and identify them with a  
4 reference to a figure or a table. In addition I would suggest reorganising Figure 2 by  
5 swapping panels A and B.  
6  
7  
8  
9

10 **Response:**

11 Yes, your guess is right. The grouping of the *SET* genes was inferred using the  
12 OrthoMCL software, which is based on a scalable method for constructing  
13 orthologous groups across multiple eukaryotic taxa. As suggested, we revised the  
14 following sentence and re-organized Figure 2 by swapping panels A and B.  
15  
16  
17  
18  
19  
20  
21  
22

23 “A character matrix that represents the present/absent states for each *SET* homologous  
24 group (a OrthoMCL-based homolog set including both putative orthologs and  
25 paralogs) was constructed to infer the ancestral states of interior nodes along with the  
26 species tree using the Mesquite program.”  
27  
28  
29  
30  
31  
32

33 **References:**

34 Li L, Stoeckert CJ, Jr., Roos DS: OrthoMCL: identification of ortholog groups for  
35 eukaryotic genomes. *Genome Res* 2003, 13(9):2178-2189.  
36  
37  
38  
39  
40

41 7. More information should be given regarding Figure 2. The bars to the right in panel  
42 A are not explained in the figure legend. Panel B is based on selected species within  
43 each order, but it is not mentioned which are these species. I suggest highlighting  
44 them on Supplementary Table S3.  
45  
46  
47  
48  
49

50 **Response:**

51 We agreed with this comment, and accordingly we revised our manuscript as follows.  
52 We added the following explanation for the bars on the right in the panel A in the  
53 figure legend of Figure 2B (original Figure 2A):  
54  
55  
56  
57

58 “The bars indicate the number ranges of *SET* homologous groups in each order.”  
59  
60  
61  
62  
63  
64  
65

We added the following sentence in the table note of the Supplementary Table S3:

“The species selected in the Figure 2A are highlighted in red.”

8. As a result of the distribution reflected in Figure 3B it is mentioned in line 233 that *SmydA* genes are absent in all Chelicerata. But in the Supplementary table S3 it is indicated that chelicerates have arthropod-specific genes in range of 2-6 copies. Please explain this discrepancy and ensure that the information reflected for these and other species is accurate.

**Response:**

Many thanks for this comment. The point that *SmydA* genes are absent in all Chelicerata could not be reflected in Figure 3B. Figure 2B (see Partial Figure 2B below) clearly indicates the absence of *SmydA* genes in Chelicerata. To improve clarity, adding “as shown in Figure 2B” to this sentence makes it clear to the readers that the point regarding to *SmydA* genes in Chelicerata is reflected in Figure 2B.

Partial Figure 2B (Figure 2A in the revision):

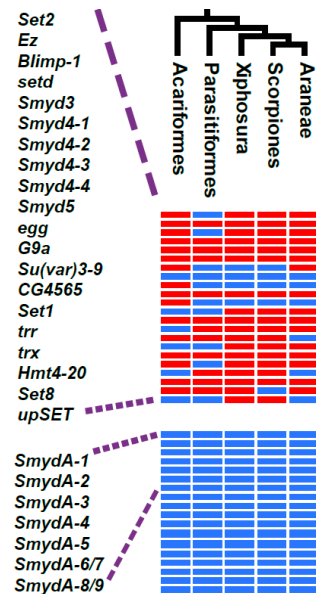

It is our fault that we did not detect that the column name had not been updated. In the the draft version of the manuscript, there were two columns, namely arthropod-specific and unclassified *SET* genes, respectively. In the original submission, we combined these two columns into a single column. Let's take

1 *Tetranychus urticae* (Chelicerata) as example. A total of 23 *SET* genes is present in  
 2 *Tetranychus urticae* (see the partial Supplementary Table S3 below), and twenty of  
 3 them are belong to the seven major conserved groups. Because 02g11280 (*Hmt4-20*),  
 4 20g02320 (*Set8*) and 20g02380 (*Set8*) could not be classified into the seven major  
 5 conserved groups (see the partial Supplementary Table S2 below), these three genes  
 6 were considered as unclassified *SET* genes. Therefore, *SmydA* is absent in  
 7 *Tetranychus urticae*. We apologize for the carelessness. In response, “AS” was  
 8 substituted to “Others”, and the footnote in Supplementary Table S3 was corrected as  
 9 follows:  
 10  
 11  
 12  
 13  
 14  
 15  
 16  
 17  
 18  
 19  
 20  
 21  
 22

23 “Others, arthropod-specific and unclassified *SET* genes.”

24 Partial Supplementary Table S3:

25 **Supplementary Table S3. Summary of *SET* genes in the 147 arthropod genomes.**

| Order       | Species                    | SMYD | SETD | PRDM | Ash | Suv | Trx | Ez | AS | Total |
|-------------|----------------------------|------|------|------|-----|-----|-----|----|----|-------|
| Acariformes | <i>Sarcoptes scabiei</i>   | 7    | 0    | 1    | 3   | 1   | 2   | 1  | 2  | 17    |
| Acariformes | <i>Tetranychus urticae</i> | 7    | 1    | 1    | 3   | 4   | 2   | 2  | 3  | 23    |

31 Partial Supplementary Table S2:

|          |                   |      |                            |
|----------|-------------------|------|----------------------------|
| 03g02610 | <i>ash1</i>       | Ash  | <i>Tetranychus urticae</i> |
| 15g00080 | <i>Blimp-1</i>    | PRDM | <i>Tetranychus urticae</i> |
| 03g02220 | <i>egg</i>        | Suv  | <i>Tetranychus urticae</i> |
| 07g01000 | <i>egg</i>        | Suv  | <i>Tetranychus urticae</i> |
| 28g01660 | <i>egg</i>        | Suv  | <i>Tetranychus urticae</i> |
| 05g08610 | <i>Ez</i>         | Ez   | <i>Tetranychus urticae</i> |
| 15g02370 | <i>Ez</i>         | Ez   | <i>Tetranychus urticae</i> |
| 02g11280 | <i>Hmt4-20</i>    | -    | <i>Tetranychus urticae</i> |
| 02g03670 | <i>Mes-4</i>      | Ash  | <i>Tetranychus urticae</i> |
| 07g03190 | <i>Set1</i>       | Trx  | <i>Tetranychus urticae</i> |
| 15g00050 | <i>Set2</i>       | Ash  | <i>Tetranychus urticae</i> |
| 20g02320 | <i>Set8</i>       | -    | <i>Tetranychus urticae</i> |
| 20g02380 | <i>Set8</i>       | -    | <i>Tetranychus urticae</i> |
| 07g04000 | <i>setd</i>       | SETD | <i>Tetranychus urticae</i> |
| 12g03090 | <i>Smyd3</i>      | SMYD | <i>Tetranychus urticae</i> |
| 02g04130 | <i>Smyd4-2</i>    | SMYD | <i>Tetranychus urticae</i> |
| 04g03960 | <i>Smyd4-2</i>    | SMYD | <i>Tetranychus urticae</i> |
| 06g06280 | <i>Smyd4-2</i>    | SMYD | <i>Tetranychus urticae</i> |
| 06g06270 | <i>Smyd4-3</i>    | SMYD | <i>Tetranychus urticae</i> |
| 08g00440 | <i>Smyd4-3</i>    | SMYD | <i>Tetranychus urticae</i> |
| 02g06270 | <i>Smyd4-4</i>    | SMYD | <i>Tetranychus urticae</i> |
| 04g08120 | <i>Su(var)3-9</i> | Suv  | <i>Tetranychus urticae</i> |
| 17g01640 | <i>trr</i>        | Trx  | <i>Tetranychus urticae</i> |

1 9. Calpena et al describe a sub-class within Smyd4, Smyd4-4, which is specific of  
2 insects. The authors should discuss if their evidence supports this.  
3

4 **Response:**  
5

6 We detected *Smyd4-4* in the non-insect arthropods, suggesting our evidence did not  
7 support the point that *Smyd4-4* is specific of insects.  
8  
9

10  
11  
12 10. The tree in Figure 3B shows a clear segregation between the SmydA and Smyd4  
13 groups, but it does not include Smyd3 or Smyd5. Smyd3 is also highlighted as absent  
14 from diptera in Figure 2B, despite the fact that there is a Smyd3 gene defined in  
15 Drosophila, which again reinforces the need to discuss the criteria for sequence  
16 inclusion (point 2) and the selection of the representative species (point 7). Are these  
17 the same representative species selected in Figure 2B?  
18  
19  
20  
21  
22  
23  
24

25 **Response:**  
26

27 Many thanks for this comment and the conscientious reading of our manuscript by the  
28 reviewer. We are VERY embarrassed. We thought we had been very circumspect in  
29 manuscript preparation, but evidently we were not sufficiently circumspect. In fact,  
30 we included *Smyd3* or *Smyd5* in Figure 3B. There is a branch named *Smyd4-5*  
31 (*Smyd4-5* has never existed throughout the manuscript and the supplementary file at  
32 all) in the Figure 3B in the original submission. Actually, *Smyd4-5* is a typo for *Smyd5*.  
33 Since the *SET* domains in *Smyd3* are only detected in a limited number of species  
34 studied (See the seventh line of the matrix in Figure 2A), the *Smyd3* genes from a few  
35 species constitute the minor branch closing to *Smyd5*. Again, it is entirely our fault  
36 and we apologize. We explained the criteria for sequence inclusion in the point 2  
37 above and included the names of the representative species in the figure legend of  
38 Figure 2B.  
39  
40  
41  
42  
43  
44  
45  
46  
47  
48  
49  
50  
51  
52

53 The Figure 3B in the original submission:  
54  
55  
56  
57  
58  
59  
60  
61  
62  
63  
64  
65



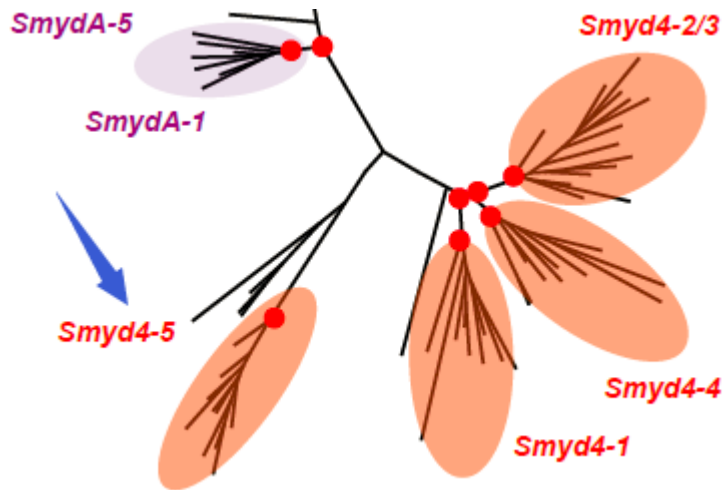

The corrected Figure 3B in the revision:

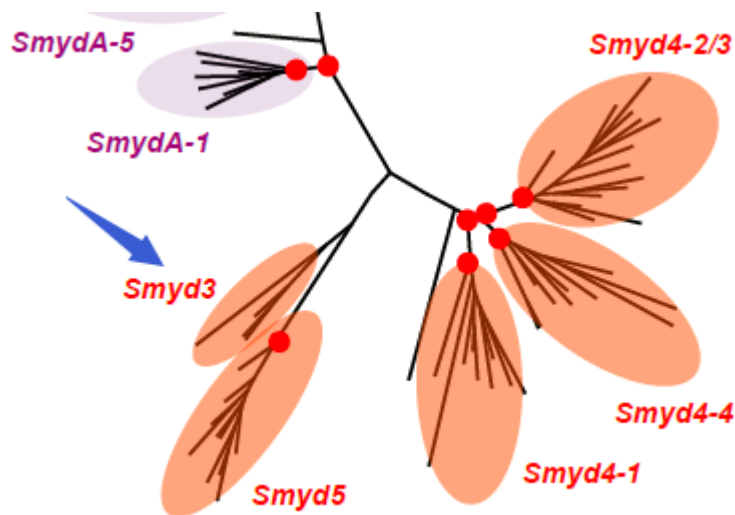

11. Unless the reader is an expert in entomology, it is difficult to identify the four species only by the body shapes. Species names should be mentioned in the legend.

**Response:**

We added the following sentence in the figure legend of Figure 3C:

“Shown from top to bottom are *Drosophila melanogaster*, *Anopheles gambiae*, *Tribolium castaneum* and *Apis mellifera*.”

Reviewer 1:

Jiang et al. performed a thorough phylogenetic analysis of arthropod SET-domain containing genes and identified an arthropod-specific SET gene family (SmydA).

1 They showed that the latter gene family is under strong purifying selection, and  
2 complemented their bioinformatic analyses with experimental data showing that a.o.  
3 members of the SmydA gene family are essential for insect survival. This is a nice and  
4 interesting study but, in my opinion, the manuscript has one major flaw, namely a  
5 very concise, in some cases unclear, Material &Methods. Once the issues mentioned  
6 below have been addressed, I consider this manuscript acceptable for publication in  
7 GigaScience.  
8  
9

10  
11  
12  
13  
14 **Response:**

15 We thank for the reviewer's positive responses for our study.  
16  
17  
18  
19  
20

21 Line 348: what was the extent of fold change for SET genes? Were the SET genes  
22 among the most highly overexpressed genes in the comparison between alternative  
23 phenotypes?  
24  
25

26  
27 **Response:**

28 We used  $|\log_2FC| > 0.585$  ( $\log_2$  fold change, corresponds to 1.5 fold change) in the  
29 DE analysis. As shown in the following figure, the extent of  $\log_2$  fold change for the  
30 SET genes ranges from -10.4 to 9.2.  
31  
32  
33  
34  
35  
36  
37

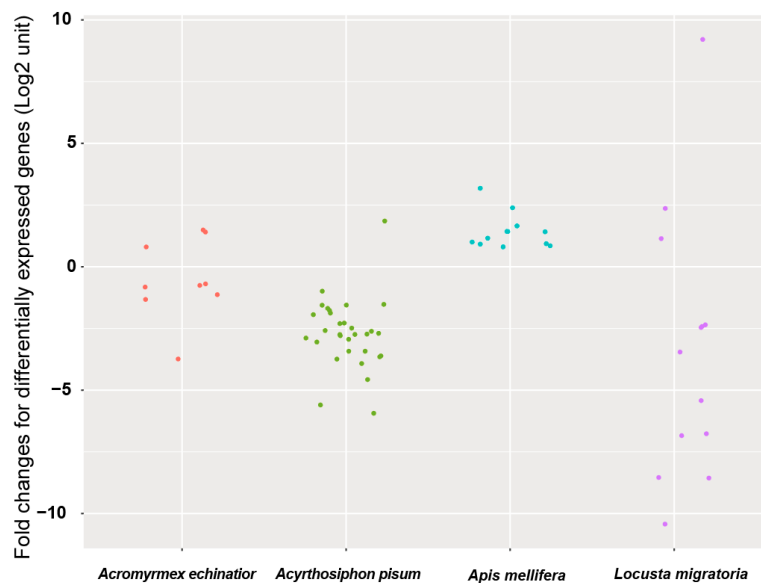

38  
39  
40  
41  
42  
43  
44  
45  
46  
47  
48  
49  
50  
51  
52  
53  
54  
55  
56  
57  
58  
59  
60 No, the SET genes were not among the most highly overexpressed genes in the  
61  
62  
63  
64  
65

1 comparison between alternative phenotypes. We sorted the DE genes in an ascending  
2 order according to their expression levels. To show the expression levels of the *SET*  
3 genes in a global view, we computed the percentile ranks of each *SET* genes and  
4 plotted the distribution of the expression percentile ranks using a dot plot. The  
5 distribution of expression percentile ranks indicated the *SET* genes in DE lists showed  
6 a broad range of expression levels.  
7  
8  
9  
10  
11  
12

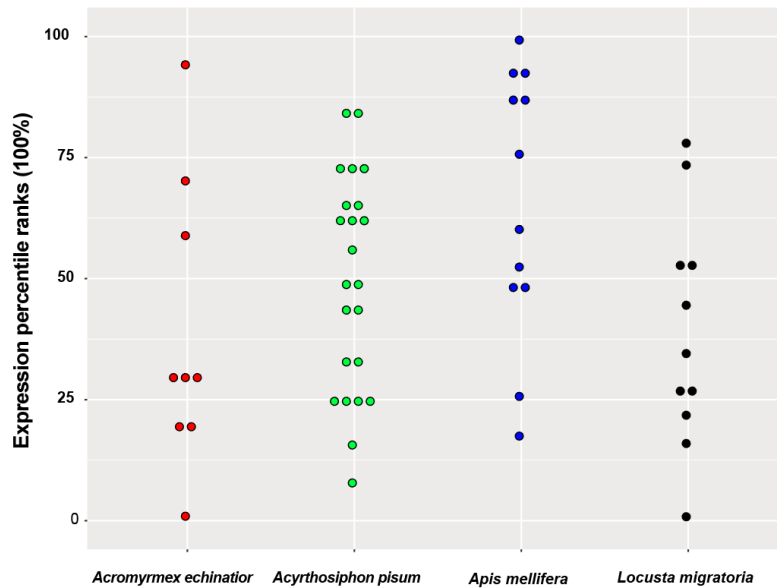

33  
34  
35 Line 499: which E-value cutoff was used in the HMMER search for SET genes?  
36

37 **Response:**

38  
39 To improve clarity, we revised the following sentence:

40  
41 “The hidden Markov model-based HMMER program was used to identify the *SET*  
42 domain containing proteins using PF00856 in the Pfam database with a conditional  
43 E-value cutoff of 1e-5 [43, 44].”  
44  
45  
46  
47  
48  
49

50 Table S2: Next to accession numbers, authors should provide a fasta-file containing  
51 the 4,498 SET gene sequences that were used for this study. This way an interested  
52 reader does not need to browse different genome portals to collect data. In addition,  
53 the study is not dependent on a website that might not be available/working in the  
54 future (see also Minor corrections).  
55  
56  
57  
58  
59

60 **Response:**

61  
62  
63  
64  
65

1 We agreed with this comment. In response to the editor's requests, we uploaded all the  
2 *SET* gene sequences to GigaDB, a database serving as a official repository to host  
3 data associated with articles in *GigaScience*. Please see the full email correspondence  
4 at the bottom of this document for further information.  
5  
6  
7  
8  
9

10 Figure 1: author should include a phylogenetic tree (as a supplementary file) with the  
11 accession numbers of the sequences (or alternatively upload the alignment to a data  
12 repository like e.g. Dryad)  
13  
14  
15

16 **Response:**

17  
18 Thanks for this comment. In response to the editor's requests, we uploaded both the  
19 alignment based and non-alignment based phylogeny trees (the accession numbers are  
20 included in the Newick trees) to the publicly accessible database GigaDB. In addition,  
21 we also uploaded the MAFFT alignment file to GigaDB.  
22  
23  
24  
25  
26  
27  
28

29 Line 504-505: GO analysis description is very concise/unclear. Authors should  
30 provide more details. e.g. be more specific about InterPro databases and models that  
31 were used.  
32  
33  
34

35 **Response:**

36  
37 Thanks for this comment. We divided all the *SET* genes into a large number of small  
38 subsets of sequences. These subsets of sequences were scanned against InterPro's  
39 signatures using the InterProScan version 5.13-52.0 program simultaneously on a  
40 Linux cluster server. The member database binaries and models include TIGRFAM,  
41 ProDom, Panther, SMART, PrositePatterns, SuperFamily, PRINTS, Gene3d, PIRSF,  
42 PfamA and PrositeProfiles. The Gene ontology terms for each *SET* gene were  
43 assigned according to the InterPro's signatures. The InterProScan output files have  
44 been uploaded to GigaDB. Accordingly, we added the InterProScan (GeneWise and  
45 PSILC as well) program version and the following sentence into the Method section:  
46  
47  
48  
49  
50  
51  
52  
53  
54  
55  
56  
57  
58  
59  
60  
61  
62  
63  
64  
65  
66  
67  
68  
69  
70  
71  
72  
73  
74  
75  
76  
77  
78  
79  
80  
81  
82  
83  
84  
85  
86  
87  
88  
89  
90  
91  
92  
93  
94  
95  
96  
97  
98  
99  
100  
101  
102  
103  
104  
105  
106  
107  
108  
109  
110  
111  
112  
113  
114  
115  
116  
117  
118  
119  
120  
121  
122  
123  
124  
125  
126  
127  
128  
129  
130  
131  
132  
133  
134  
135  
136  
137  
138  
139  
140  
141  
142  
143  
144  
145  
146  
147  
148  
149  
150  
151  
152  
153  
154  
155  
156  
157  
158  
159  
160  
161  
162  
163  
164  
165  
166  
167  
168  
169  
170  
171  
172  
173  
174  
175  
176  
177  
178  
179  
180  
181  
182  
183  
184  
185  
186  
187  
188  
189  
190  
191  
192  
193  
194  
195  
196  
197  
198  
199  
200  
201  
202  
203  
204  
205  
206  
207  
208  
209  
210  
211  
212  
213  
214  
215  
216  
217  
218  
219  
220  
221  
222  
223  
224  
225  
226  
227  
228  
229  
230  
231  
232  
233  
234  
235  
236  
237  
238  
239  
240  
241  
242  
243  
244  
245  
246  
247  
248  
249  
250  
251  
252  
253  
254  
255  
256  
257  
258  
259  
260  
261  
262  
263  
264  
265  
266  
267  
268  
269  
270  
271  
272  
273  
274  
275  
276  
277  
278  
279  
280  
281  
282  
283  
284  
285  
286  
287  
288  
289  
290  
291  
292  
293  
294  
295  
296  
297  
298  
299  
300  
301  
302  
303  
304  
305  
306  
307  
308  
309  
310  
311  
312  
313  
314  
315  
316  
317  
318  
319  
320  
321  
322  
323  
324  
325  
326  
327  
328  
329  
330  
331  
332  
333  
334  
335  
336  
337  
338  
339  
340  
341  
342  
343  
344  
345  
346  
347  
348  
349  
350  
351  
352  
353  
354  
355  
356  
357  
358  
359  
360  
361  
362  
363  
364  
365  
366  
367  
368  
369  
370  
371  
372  
373  
374  
375  
376  
377  
378  
379  
380  
381  
382  
383  
384  
385  
386  
387  
388  
389  
390  
391  
392  
393  
394  
395  
396  
397  
398  
399  
400  
401  
402  
403  
404  
405  
406  
407  
408  
409  
410  
411  
412  
413  
414  
415  
416  
417  
418  
419  
420  
421  
422  
423  
424  
425  
426  
427  
428  
429  
430  
431  
432  
433  
434  
435  
436  
437  
438  
439  
440  
441  
442  
443  
444  
445  
446  
447  
448  
449  
450  
451  
452  
453  
454  
455  
456  
457  
458  
459  
460  
461  
462  
463  
464  
465  
466  
467  
468  
469  
470  
471  
472  
473  
474  
475  
476  
477  
478  
479  
480  
481  
482  
483  
484  
485  
486  
487  
488  
489  
490  
491  
492  
493  
494  
495  
496  
497  
498  
499  
500  
501  
502  
503  
504  
505  
506  
507  
508  
509  
510  
511  
512  
513  
514  
515  
516  
517  
518  
519  
520  
521  
522  
523  
524  
525  
526  
527  
528  
529  
530  
531  
532  
533  
534  
535  
536  
537  
538  
539  
540  
541  
542  
543  
544  
545  
546  
547  
548  
549  
550  
551  
552  
553  
554  
555  
556  
557  
558  
559  
560  
561  
562  
563  
564  
565  
566  
567  
568  
569  
570  
571  
572  
573  
574  
575  
576  
577  
578  
579  
580  
581  
582  
583  
584  
585  
586  
587  
588  
589  
590  
591  
592  
593  
594  
595  
596  
597  
598  
599  
600  
601  
602  
603  
604  
605  
606  
607  
608  
609  
610  
611  
612  
613  
614  
615  
616  
617  
618  
619  
620  
621  
622  
623  
624  
625  
626  
627  
628  
629  
630  
631  
632  
633  
634  
635  
636  
637  
638  
639  
640  
641  
642  
643  
644  
645  
646  
647  
648  
649  
650  
651  
652  
653  
654  
655  
656  
657  
658  
659  
660  
661  
662  
663  
664  
665  
666  
667  
668  
669  
670  
671  
672  
673  
674  
675  
676  
677  
678  
679  
680  
681  
682  
683  
684  
685  
686  
687  
688  
689  
690  
691  
692  
693  
694  
695  
696  
697  
698  
699  
700  
701  
702  
703  
704  
705  
706  
707  
708  
709  
710  
711  
712  
713  
714  
715  
716  
717  
718  
719  
720  
721  
722  
723  
724  
725  
726  
727  
728  
729  
730  
731  
732  
733  
734  
735  
736  
737  
738  
739  
740  
741  
742  
743  
744  
745  
746  
747  
748  
749  
750  
751  
752  
753  
754  
755  
756  
757  
758  
759  
760  
761  
762  
763  
764  
765  
766  
767  
768  
769  
770  
771  
772  
773  
774  
775  
776  
777  
778  
779  
780  
781  
782  
783  
784  
785  
786  
787  
788  
789  
790  
791  
792  
793  
794  
795  
796  
797  
798  
799  
800  
801  
802  
803  
804  
805  
806  
807  
808  
809  
810  
811  
812  
813  
814  
815  
816  
817  
818  
819  
820  
821  
822  
823  
824  
825  
826  
827  
828  
829  
830  
831  
832  
833  
834  
835  
836  
837  
838  
839  
840  
841  
842  
843  
844  
845  
846  
847  
848  
849  
850  
851  
852  
853  
854  
855  
856  
857  
858  
859  
860  
861  
862  
863  
864  
865  
866  
867  
868  
869  
870  
871  
872  
873  
874  
875  
876  
877  
878  
879  
880  
881  
882  
883  
884  
885  
886  
887  
888  
889  
890  
891  
892  
893  
894  
895  
896  
897  
898  
899  
900  
901  
902  
903  
904  
905  
906  
907  
908  
909  
910  
911  
912  
913  
914  
915  
916  
917  
918  
919  
920  
921  
922  
923  
924  
925  
926  
927  
928  
929  
930  
931  
932  
933  
934  
935  
936  
937  
938  
939  
940  
941  
942  
943  
944  
945  
946  
947  
948  
949  
950  
951  
952  
953  
954  
955  
956  
957  
958  
959  
960  
961  
962  
963  
964  
965  
966  
967  
968  
969  
970  
971  
972  
973  
974  
975  
976  
977  
978  
979  
980  
981  
982  
983  
984  
985  
986  
987  
988  
989  
990  
991  
992  
993  
994  
995  
996  
997  
998  
999  
1000

1  
2  
3 Line 512: what settings were used with MAFFT?

4  
5 **Response:**

6  
7 To improve clarity, we revised the following sentence:

8  
9 “Multiple alignments were generated using the MAFFT alignment software with  
10 default parameters.”  
11

12  
13  
14  
15 line 514: which version of ProtTest software was used?

16  
17 **Response:**

18  
19 We revised the following sentence to make a clear statement for the ProtTest software  
20 version used in this study.  
21

22  
23 “According to the Akaike information criterion, the model of molecular evolution  
24 with the best fit to the data was determined by using the ProtTest 3.4.2 software [49].”  
25  
26

27  
28  
29 Line 519: authors should provide more details about the feature frequency profile  
30 method (parameters etc...)  
31

32  
33 **Response:**

34  
35 To improve clarity, we revised the following sentence:

36  
37 “The alignment-free and distance-based methods for phylogenetic tree building were  
38 implemented by means of the feature frequency profile method with the FFP version  
39 3.19 suite (<http://sourceforge.net/projects/ffp-phylogeny/>), utilizing the FFPaa  
40 program for amino acid sequences with a word length of  $L = 5$ . The FFPboot program  
41 was used for bootstrap analysis of the tree generated for 100 replicates.”  
42  
43  
44  
45  
46  
47  
48  
49

50  
51 Line 528: the authors are very concise regarding the single copy orthologous gene  
52 family phylogenetic analysis, authors should provide more details (method?, provide  
53 alignment as a supplementary file).  
54

55  
56 **Response:**

57  
58 Thanks for this comment. Using BUSCO analysis, genes sets were classified into the  
59 four categories, namely completed, duplicated, fragmented and missing, respectively.  
60  
61  
62  
63  
64  
65

1 Only the completed BUSCO genes (single-copy ortholog) were used for further  
2 species tree construction. A neighbor-joining phylogenetic tree was constructed from  
3 amino acid sequences of single-copy orthologs using Phylip version 3.69 package.  
4 The bootstrap values, calculated from 100 replicates using the seqboot, protdist,  
5 neighbor and consense programs of Phylip version 3.69 package. As requested by the  
6 executive editor, we uploaded both the BUSCO-based “species tree” and the MAFFT  
7 alignment file for BUSCO-based single-copy genes to GigaDB. In response, we  
8 revised the following sentences in the Method section:  
9

10  
11  
12  
13  
14  
15  
16  
17  
18  
19 “Single-copy orthologous gene families were inferred from the benchmarking  
20 universal single-copy ortholog BUSCO gene sets from each species [51]. The  
21 resulting 527 single-copy orthologous (completed genes in BUSCO) gene families  
22 were used to construct the neighbor-joining species tree, which is consistent with the  
23 phylogenomic tree recently inferred from transcriptome data [18]. The  
24 neighbor-joining species tree was constructed from amino acid sequences of  
25 single-copy orthologs using Phylip version 3.69 package. The bootstrap values,  
26 calculated from 100 replicates using the seqboot, protdist, neighbor and consense  
27 programs of Phylip package.”  
28  
29  
30  
31  
32  
33  
34  
35  
36  
37  
38

39 Line 538: authors should provide genome assembly versions of the different insect  
40 species  
41

42  
43 **Response:**

44 We added the following sentence in the Method section:

45  
46  
47 “(genome assembly version: v2.4 for *L. migratoria*, v1.0 for *A. pisum*, Amel\_2.0 for *A.*  
48 *mellifera* and Aech\_v2.0 for *A. echnatiior*, respectively)”  
49  
50  
51

52  
53  
54 Line 539-542: author should provide parameters for the Tophat2 mapping. What  
55 version of Tophat 2 was used? What version of HTSeq and EdgeR was used?  
56

57  
58 **Response:**

59 The versions are 2.0.14 for Tophat2, 0.6.1 for HTSeq and 3.8.0 for edgeR,  
60  
61  
62  
63  
64  
65

1 respectively. We added the versions for these three programs in the Method section.  
2  
3

4 line 542: what was the FC cutoff used for the DE analysis? In addition authors should  
5 provide a list of DE genes for all comparisons as a Supplementary Table  
6  
7

8 **Response:**  
9

10 We used  $|\log_2\text{FC}| > 0.585$  (log2 fold change, corresponds to 1.5 fold change) in the  
11 DE analysis. We uploaded the lists of DE genes for the four insects to GigaDB.  
12  
13  
14

15  
16 line 548: ...and then backtranslated...; with what kind of software/script was the  
17 backtranslation done?  
18  
19

20 **Response:**  
21

22 A basic command line is required for this task. We put the sequences (the aligned  
23 protein sequences in the first column and the corresponding nucleotide sequences in  
24 the second column) into a file, and type the following command for backtranslation:  
25  
26  
27

```
28 cat filename | perl -ne ' my ($aa,$nt) = split /\t/; my $j = 0;for (my $i = 0;$i <  
29 length($aa) - 1;$i++){ my $amiac = substr($aa,$i,1); my $bases = "";if ($amiac !~ /\-/)  
30 { $bases = substr($nt,$j,3); $j+=3;} else { $bases = "---";} print "$bases";}'  
31  
32  
33  
34  
35  
36  
37  
38
```

39 Line 546-547/: how was the SmydA-2 gene picked up, which primers/PCR protocol  
40 were used?  
41  
42

43 **Response:**  
44

45 We added the PCR protocol in the Method section and provided the primers in the  
46 Supplementary Table S4.  
47  
48  
49

50  
51 “The PCR parameters were a preincubation 94 °C for 5 min, followed by 30 cycles of  
52 94 °C for 10 sec, 58 °C for 30 sec,72 °C for 30 sec, and a final extension at 72 °C for  
53 10min.”  
54  
55  
56  
57  
58

59 Line 559-560: very concise description of recombinant protein expression? Which  
60  
61  
62  
63  
64  
65

1 primers were used to pick-up gene/ligation protocol (restriction enzymes?) into vector  
2 etc. Authors should provide more details.  
3

4 **Response:**

5  
6 We provided the more detailed description for the recombinant protein expression and  
7 provided the primers in the Supplementary Table S4. Accordingly, we revised the  
8 following sentences in the revision:  
9  
10

11  
12  
13  
14 “The recombinant proteins for *SmydA-2* and the negative controls of translation  
15 system were produced using the TNT protein expression system (Promega) following  
16 the manufacturer’s protocol. In brief, 3 μg PCR-generated DNA templates  
17 (Supplementary Table S4) were added to 30 μl TNT master mix, and the translation  
18 reactions were incubated at 25 °C for 2 hr. The recombinant proteins were verified by  
19 Western blotting using His-tag antibodies.”  
20  
21  
22  
23  
24  
25  
26  
27  
28  
29

30  
31 Line 569: is this a well-established laboratory locust strain? Has this strain been  
32 previously described (origin, name?). Authors should provide more details for this  
33 strain if possible.  
34  
35

36 **Response:**

37  
38 Yes, the locusts used in this study are from a well-established laboratory locust strain  
39 in our lab. This locust strain has been sequenced and described in our previous studies.  
40  
41 In response, we revised the following sentence:  
42  
43

44  
45 “Locusts (the migratory locust, *Locusta migratoria*) were reared in large,  
46 well-ventilated cages (40 cm × 40 cm × 40 cm) at a density of 500–1000 insects per  
47 container.”  
48  
49  
50  
51  
52

53 **References:**

54  
55 Kang L, Chen X, Zhou Y, Liu B, Zheng W, Li R, Wang J, Yu J: The analysis of  
56 large-scale gene expression correlated to the phase changes of the migratory locust.  
57 *Proc Natl Acad Sci U S A* 2004, 101(51):17611-17615.  
58  
59  
60  
61  
62  
63  
64  
65



1 Ma Z, Guo W, Guo X, Wang X, Kang L: Modulation of behavioral phase changes of  
2 the migratory locust by the catecholamine metabolic pathway. *Proc Natl Acad Sci U S*  
3 *A* 2011, 108(10):3882-3887.  
4  
5

6 Yang M, Wei Y, Jiang F, Wang Y, Guo X, He J, Kang L: MicroRNA-133 inhibits  
7 behavioral aggregation by controlling dopamine synthesis in locusts. *PLoS Genet*  
8 2014, 10(2):e1004206.  
9  
10

11 Wang X, Fang X, Yang P, Jiang X, Jiang F, Zhao D, Li B, Cui F, Wei J, Ma C et al:  
12 The locust genome provides insight into swarm formation and long-distance flight.  
13 *Nat Commun* 2014, 5:2957.  
14  
15

16 He J, Chen Q, Wei Y, Jiang F, Yang M, Hao S, Guo X, Chen D, Kang L:  
17 MicroRNA-276 promotes egg-hatching synchrony by up-regulating brm in locusts.  
18 *Proc Natl Acad Sci U S A* 2016, 113(3):584-589.  
19  
20  
21  
22  
23  
24  
25  
26

27 Line 572: authors should provide primers that were used for dsRNA synthesis  
28

29 **Response:**  
30

31 We provided the primers in the Supplementary Table S4.  
32  
33  
34

35 Line 578/579: authors should provide more details regarding measuring of SmydA-2  
36 mRNA expression levels (qPCR: primers, amplification protocol, reference genes?...)  
37  
38

39 **Response:**  
40

41 We added the following sentences in the Method section and provided the primers in  
42 the Supplementary Table S4.  
43  
44  
45  
46

47 “The parameters were a pre-incubation 95°C for 10 min, followed by 45 cycles of  
48 95 °C for 10 sec, 58 °C for 20 sec, and a single acquisition when 72 °C for 20 sec. The  
49 ribosomal protein 49 gene was used as reference control, and the quantification was  
50 based on the requirement of PCR cycle number (Ct) to cross or exceed the  
51 fluorescence intensity level; the  $2^{-\Delta\Delta Ct}$  method was used to analyze mRNA expression  
52 levels.”  
53  
54  
55  
56  
57  
58  
59  
60  
61  
62  
63  
64  
65

1 Line 580: literature reference for the Kaplan-Meier method?  
2

3 **Response:**

4 We added the literature reference for the Kaplan-Meier method in the Method section.  
5  
6  
7

8 Line 806: which representative species were used, authors should include a  
9 phylogenetic tree (as a supplementary file) with the accession numbers of the  
10 sequences (or alternatively upload the alignment to a data repository like e.g. Dryad)  
11  
12  
13

14 **Response:**

15 The 11 representative species were selected from 11 arthropod orders. We have  
16 uploaded the alignment file to GigaDB and included the species names in the figure  
17 legend of Figure 3B as follows:  
18  
19  
20  
21

22 “The representative species include *Apis mellifera*, *Daphnia pule*, *Drosophila*  
23 *melanogaster*, *Ixodes scapularis*, *Locusta migratoria*, *Pediculus humanus*, *Plutella*  
24 *xylostella*, *Rhodnius prolixus*, *Tetranychus urticae*, *Timema cristinae* and *Tribolium*  
25 *castaneum*.”  
26  
27  
28  
29  
30

31  
32  
33 **Typos/Minor Corrections**

34  
35  
36  
37 line 143: link to SET gene database is not working (see also comment above)

38  
39 **Response:**

40 We checked the running status of the *SET* gene database and we will take a periodic  
41 checking to make sure the database is working properly. Alternatively, all the data  
42 deposited in our database can be retrieved from the database GigaDB which is  
43 maintained by *GigaScience*.  
44  
45  
46  
47  
48  
49  
50

51 line 151: why would genome-size be correlated with SET-gene number? Is there any  
52 precedent in literature. If not, authors should remove this sentence  
53  
54

55 **Response:**

56 We agreed with this comment, and we removed this sentence in the revision.  
57  
58  
59  
60  
61  
62  
63  
64  
65

1 Line 155: please specify in the manuscript which "representative species" were used  
2 for phylogenetic analysis?  
3

4 **Response:**

5 We included the species names in the figure legend of Figure 1 as follows:  
6

7 “The representative species include *Apis mellifera*, *Daphnia pule*, *Drosophila*  
8 *melanogaster*, *Ixodes scapularis*, *Locusta migratoria*, *Pediculus humanus*, *Plutella*  
9 *xylostella*, *Rhodnius prolixus*, *Tetranychus urticae*, *Timema cristinae* and *Tribolium*  
10 *castaneum*.”  
11  
12  
13  
14  
15  
16

17  
18  
19 Line 266: was present in all...

20 **Response:**

21 Thanks for your elaborative comments. The text has been revised as suggested.  
22  
23  
24  
25  
26

27 Line 284: replace "were" with "are"

28 **Response:**

29 The text has been revised as suggested.  
30  
31  
32  
33  
34

35 Line 309: methylation activities

36 **Response:**

37 The text has been revised as suggested.  
38  
39  
40  
41  
42

43 Line 354: "sensitivities" of DEG number? Authors should rephrase

44 **Response:**

45 We revised the following sentence in the revision:  
46  
47

48 “the number changes of the DEGs in *SET* genes in the four insects were even more  
49 prominent...”  
50  
51  
52  
53  
54  
55

56 Line 375: remove "as"

57 **Response:**

58 The text has been revised as suggested.  
59  
60  
61  
62  
63  
64  
65

1  
2 Figure 2B: reformat/resize font so the names of the arthropod specific SET genes  
3  
4 can also be shown  
5

6 **Response:**  
7

8 As suggested, we resized the font of Figure 2B to show the names of *SmydA* in the  
9 arthropod specific *SET* genes. We did not label the remaining ones in the arthropod  
10 specific *SET* genes, because they are randomly emerged and are not  
11 well-characterized into a specific gene category.  
12  
13  
14  
15  
16  
17  
18  
19  
20

21 **Previous Responses to Dr. Scott Edmunds, executive editor of GigaScience, in**  
22 **November 10, 2016**  
23

24  
25 From: Feng Jiang jiangf@biols.ac.cn  
26

27 To: database@gigasciencejournal.com, em@editorialmanager.com  
28

29 CC: KANG <lkang@ioz.ac.cn>  
30  
31

32  
33 Dear Dr. Scott Edmunds and Dr. Chris Hunter,  
34

35 We have uploaded all the required files to GigaDB and provide a point-by-point  
36 response below to your previous comments. Please substitute the revised manuscripts  
37 (including main-text, supplementary file and Table 1) which are included in the  
38 attached files to the corresponding files in our previous submission.  
39  
40  
41  
42  
43

44 Best regards,  
45

46 Feng Jiang  
47

48 On behalf of Prof. Le Kang  
49  
50  
51

52 Here is the lists for the files we have uploaded to GigaDB.  
53

- 54 1) All the sequences files for SET genes in this study: 1.allSETgeneSequence.tar.gz
- 55 2) The alignment based and non-alignment based phylogeny trees and the MAFFT  
56 alignment file in the Figure 1: 2.PhylogeneticTreeSETgenes.tar.gz  
57  
58  
59  
60  
61  
62  
63  
64  
65

- 1 3) The BUSCO-based “species tree” which is used for phylogeny inference of  
2 insect orders in the Figure 2: 3.BUSCOSpeciesTree.tar.gz  
3
- 4 4) The MAFFT alignment file for BUSCO-based single-copy genes:  
5 4.BUSCOalignment.tar.gz  
6
- 7 5) HMMER output file for SET domain identification: 5.HMMERout.tar.gz  
8
- 9 6) PSILC program output file: 6.PSILCoutput.tar.gz  
10
- 11 7) InterProScan output file: 7.InterProScanoutput.tar.gz  
12
- 13 8) The phylogeny trees include in the supplementary files (in Newick format): 8.  
14 PhylogenyTreesinSupplyFiles.tar.gz  
15
- 16 9) The improved gene models using transcriptome data:  
17 9.RevisedGeneModels.tar.gz  
18

19 1. For the fasta file of CDS and protein translations, do you have references or  
20 accession numbers for how this was put together? This needs to be in a supplemental  
21 file if it isn't already.  
22

23  
24  
25  
26  
27  
28  
29  
30  
31  
32  
33 **Response:**

34 All the accession numbers for the SET genes involved in this study were provided in  
35 the supplemental Table in our previous submission.  
36  
37

38  
39  
40  
41 2. Table S1 has some inconsistencies (its hard to check as its pdf rather than CSV file,  
42 but for ZNEV you use a DIFFERENT species codename in the table (ZOONE) that  
43 needs correcting) and the "Genome Database" column is not very useful because it  
44 just gives generic link to the massive archives without exact accessions for the  
45 genomes used. And an unstable looking Chinese ftp site. Is this going into the INSDC  
46 databases like the SRA?  
47  
48

49  
50  
51  
52  
53 **Response:**

54 A five-letter abbreviation for species name is used throughout the manuscript. For  
55 example, ZOONE is an abbreviation for the species name *Zootermopsis nevadensis*.  
56 ZNEV (for example, ZNEV\_05631 stands for the G9A gene in ZOONE) is used as  
57  
58  
59  
60  
61  
62  
63  
64  
65

1 the leading letters for accession number in the official gene sets which are released by  
2 the Zootermopsis nevadensis genome sequencing consortium. Therefore, there is no  
3 inconsistency in the supplemental Tables.  
4  
5  
6

7  
8 The “version” column indicates the exact database version involved in this study. In  
9 the revision we have provided the extract web path for the databases in the  
10 supplementary file.  
11  
12  
13

14  
15 All the sequences deposited in our web server have been uploaded to GigaDB. This  
16 GigaDB database server can provide high-quality and stable services for data retrieval  
17 in future.  
18  
19  
20  
21

22  
23  
24  
25 3. We also will need the data backing up statements like: "Fluorescence in situ  
26 hybridization analysis and in vitro methyltransferase activity assays showed that".  
27 Also, is this the same data as "Images for fluorescence signals were acquired using an  
28 LSM 710 confocal fluorescence microscope (Zeiss)."  
29  
30  
31

32  
33 **Response:**

34  
35 Yes, this is the same data as "Images for fluorescence signals were acquired using an  
36 LSM 710 confocal fluorescence microscope (Zeiss). The data for these two analyses  
37 are shown in the Figure 4.  
38  
39  
40  
41

42  
43  
44 4. You used CEGMA to extract 455 single copy genes, so we need the alignment files  
45 for those and the newick trees they generated from them. CEGMA isn't updated, so  
46 would be better to replace this with BUSCO.  
47  
48  
49

50 **Response:**

51  
52 In this revision we replace our CEGMA results with the results generated from  
53 BUSCO and revised the manuscript accordingly. We have uploaded the alignment  
54 files and the newick trees of BUSCO data to GigaDB.  
55  
56  
57  
58

59  
60 5. Looking at table1.2016102701.xls, how do they make their totals up? for example  
61  
62  
63  
64  
65

1 if you look at row 12

2 Diptera Aedes (2) 11-12 1 2 3-4 2-3 3-4  
3  
4 1-2 11-12 34-38  
5

6 the difference between the range in the total is only 4 yet the differences in the values  
7 is 6? i.e. the total should be 34-40 not 34-38. row 13 has an even bigger difference.  
8  
9

10 **Response:**

11 The dash is used to represent the range of SET gene number in each genus. Because  
12 the gene numbers for different conserved SET groups are variable, the range of SET  
13 gene number could be summed up as the addition of the lower limits to upper limits of  
14 gene number in the same genus. The exact gene number for different groups in a  
15 species are shown in the supplementary Table 3. As shown in the supplementary Table  
16 3, there are two species in the genus Aedes. The gene numbers for the two species are  
17 11:0(1):2:3:2:3:2:11 and 12:0(1):2:4:3:4:1:12, respectively. The sum of these numbers  
18 are 34 (11+0+2+3+2+3+2+11) and 38 (12+0+2+4+3+4+1+12), respectively. The  
19 numbers in parenthesis indicates the number of the genes which are not present in the  
20 official gene sets. This statement is provided in the table note of the supplementary  
21 Table 3. To improve clarity, we add the sentence "The exact gene numbers for  
22 different groups in a species are shown in the supplementary Table 3." in the table  
23 note of Table 1 in the revision.  
24  
25  
26  
27  
28  
29  
30  
31  
32  
33  
34  
35  
36  
37  
38  
39  
40

41 6. There are no alignment files provided anywhere, so we would need the MAFFT  
42 output alignments. And tree files for both sorts of the phylogenetic analysis (alignment  
43 based and non-alignment based), and the "species tree" used (all in Newick or other  
44 common tree format).  
45  
46  
47  
48

49 **Response:**

50 We have uploaded these files to GigaDB.  
51  
52  
53  
54  
55

56 We should also get the following other files a) HMMER\* output file; b) the  
57 multi-fasta alignments to support the statement "obvious incorrect gene models were  
58 improved with transcriptome data"; C) The PSILC program output file, for evidence  
59  
60  
61  
62  
63  
64  
65

1 of pseudogenes; d)The InterProScan output file.

2 **Response:**

3  
4 We have uploaded these files to GigaDB.

5  
6  
7  
8 You also need to cite HMMER in the manuscript.

9  
10 **Response:**

11  
12 In the previous submission the HMMER paper was already cited in the second  
13 paragraphs of the Materials and Methods section.  
14  
15  
16  
17  
18  
19  
20

21 From: GigaScience EdOffice

22  
23 To: Le Kang

24  
25 Subject: GigaScience, GIGA-D-16-00127 - data queries

26  
27 CC: database@gigasciencejournal.com  
28  
29  
30

31 GIGA-D-16-00127

32  
33 Comparative genomic analysis of SET-domain family reveals the origin, expansion,  
34 and putative function of the arthropod-specific SmydA genes as histone modifier in  
35 insects  
36  
37  
38

39 Feng Jiang; Qing Liu; Yanli Wang; Jie Zhang; Huimin Wang; Tianqi Song; Meiling  
40 Yang; Xianhui Wang; Le Kang

41  
42 GigaScience  
43  
44  
45  
46  
47  
48

49 Dear Le Kang,  
50  
51  
52  
53

54 Apologies for the slow follow up, but things have been a bit hectic with travels and  
55 ICG. We've gone through your paper and have the following questions and  
56 requirements for data before this can be sent to review.  
57  
58  
59  
60  
61  
62  
63  
64  
65



1 1. For the fasta file of CDS and protein translations, do you have references or  
2 accession numbers for how this was put together? This needs to be in a supplemental  
3 file if it isn't already.  
4  
5  
6

7  
8 2. Table S1 has some inconsistencies (its hard to check as its pdf rather than CSV file,  
9 but for ZNEV you use a DIFFERENT species codename in the table (ZOONE) that  
10 needs correcting) and the "Genome Database" column is not very useful because it  
11 just gives generic link to the massive archives without exact accessions for the  
12 genomes used. And an unstable looking Chinese ftp site. Is this going into the INSDC  
13 databases like the SRA?  
14  
15  
16  
17  
18  
19  
20

21  
22 3. We also will need the data backing up statements like: "Fluorescence in situ  
23 hybridization analysis and in vitro methyltransferase activity assays showed that".  
24 Also, is this the same data as "Images for fluorescence signals were acquired using an  
25 LSM 710 confocal fluorescence microscope (Zeiss)."  
26  
27  
28  
29  
30  
31

32  
33 4. You used CEGMA to extract 455 single copy genes, so we need the alignment files  
34 for those and the newick trees they generated from them. CEGMA isn't updated, so  
35 would be better to replace this with BUSCO.  
36  
37  
38  
39  
40  
41

42  
43 5. Looking at table1.2016102701.xls, how do they make their totals up? for example  
44 if you look at row 12  
45  
46

47 Diptera Aedes (2) 11-12 1 2 3-4 2-3 3-4  
48  
49 1-2 11-12 34-38  
50  
51

52 the difference between the range in the total is only 4 yet the differences in the values  
53 is 6? i.e. the total should be 34-40 not 34-38. row 13 has an even bigger difference.  
54  
55  
56  
57

58 6. There are no alignment files provided anywhere, so we would need the MAFFT  
59 output alignments. And tree files for both sorts of the phylogentic analysis (alignment  
60  
61  
62  
63  
64  
65

1 based and non-alignment based), and the "species tree" used (all in Newick or other  
2 common tree format).  
3

4  
5  
6 We should also get the following other files a) HMMER\* output file; b) the  
7 multi-fasta alignments to support the statement "obvious incorrect gene models were  
8 improved with transcriptome data"; C) The PSILC program output file, for evidence  
9 of pseudogenes; d)The InterProScan output file.  
10  
11  
12  
13  
14

15  
16  
17 You also need to cite HMMER in the manuscript.  
18  
19  
20

21 Please work with our curators (cc'd) to get this (and any other data they highlight) and  
22 also send any changes to the manuscript and supplemental files for the paper to us and  
23 we will replace them in the submission.  
24  
25  
26  
27

28  
29 Let us know if you have any questions.  
30  
31

32  
33 Best wishes,  
34  
35  
36

37 Scott  
38  
39  
40  
41  
42  
43  
44  
45  
46  
47  
48  
49  
50  
51  
52  
53  
54  
55  
56  
57  
58  
59  
60  
61  
62  
63  
64  
65

1 **Comparative genomic analysis of *SET*-domain family reveals the**  
2 **origin, expansion, and putative function of the arthropod-specific**  
3 ***SmydA* genes as histone modifier in insects**

4 **Feng Jiang<sup>1,\*</sup>, Qing Liu<sup>1,2,\*</sup>, Yanli Wang<sup>2,3</sup>, Jie Zhang<sup>1</sup>, Huimin Wang<sup>1</sup>, Tianqi**  
5 **Song<sup>3</sup>, Meiling Yang<sup>2</sup>, Xianhui Wang<sup>2,#</sup>, Le Kang<sup>1,2,#</sup>**

6 <sup>1</sup> Beijing Institutes of Life Science, Chinese Academy of Sciences, Beijing, China

7 <sup>2</sup> State Key Laboratory of Integrated Management of Pest Insects and Rodents,  
8 Institute of Zoology, Chinese Academy of Sciences, Beijing, China

9 <sup>3</sup> Institute of Applied Biology, Shanxi University, Taiyuan, Shanxi, China

10 \*These authors contributed equally to this study.

11 Corresponding authors:

12 Le Kang, Ph.D. and Professor

13 Institute of Zoology, Chinese Academy of Sciences

14 Beijing 100101, China

15 Tel: 86-10-6480-7219

16 Fax: 86-10-6480-7099

17 E-mail: lkang@ioz.ac.cn

18 OR

19 Xianhui, Wang Ph.D. and Professor

20 Institute of Zoology, Chinese Academy of Sciences

21 Beijing 100101, China

22 Tel: 86-10-64807220

23 Fax: 86-10-6480-7099

24 E-mail: wangxh@ioz.ac.cn

Evolution of *SET* Genes in Insects

## 25 **Abstract**

26 The *SET* domain is an evolutionarily conserved motif present in histone lysine  
27 methyltransferases, which are important in the regulation of chromatin and gene  
28 expression in animals. In this study, we searched for *SET* domain-containing genes  
29 (*SET* genes) in all of the 147 arthropod genomes sequenced so far to understand the  
30 evolutionary history by which *SET* domain have evolved in insects. Phylogenetic and  
31 ancestral state reconstruction analysis revealed an arthropod-specific *SET* gene  
32 family, named *SmydA*, which is ancestral to arthropod animals and specifically  
33 diversified during insect evolution. Considering that pseudogenization is the most  
34 probable fate of the new emerging gene copies, we provided experimental and  
35 evolutionary evidence to demonstrate their essential functions. Fluorescence *in situ*  
36 hybridization analysis and *in vitro* methyltransferase activity assays showed that the  
37 *SmydA-2* gene was transcriptionally active and retained the original histone  
38 methylation activity. Expression knockdown by RNA interference significantly  
39 increased mortality, implying that the *SmydA* genes may be essential for insect  
40 survival. We further showed predominantly strong purifying selection on the *SmydA*  
41 gene family and a potential association between the regulation of gene expression and  
42 insect phenotypic plasticity by transcriptome analysis. Overall, these data suggest that  
43 the *SmydA* gene family retains essential functions that may possibly define novel  
44 regulatory pathways in insects. This work provides insights into the roles of  
45 lineage-specific domain duplication in insect evolution.

46 *Key words:* insects, domain, gene duplication, histone modification.

58 Evolution of *SET* Genes in Insects

## 47 **Background**

1  
2  
3 48 Protein domains are functional and structural units that are evolutionary well  
4  
5 49 conserved across species [1]. Specific protein domains are often linked to discrete  
6  
7  
8 50 biological function; therefore, the frequent duplication, gain, and loss of protein  
9  
10  
11 51 domains play substantial roles in functional novelty [2]. Domain duplication can be  
12  
13 52 achieved via frequent domain-containing gene family expansion. Thus, the member  
14  
15 53 number of a gene family that contains domains can be expanded, representing a  
16  
17  
18 54 common method by which divergence to domain sequences can lead to the  
19  
20 55 evolutionary novelty of domain-containing genes [3]. Rapid domain diversification in  
21  
22 56 particular lineages is important for the adaptation of lineage-specific ecological  
23  
24  
25 57 specializations [4].

27  
28 58 Histones are highly alkaline proteins in cell nuclei that package and order the  
29  
30 59 nuclear DNA into nucleosomes, which are the main components of chromatin.  
31  
32 60 Histone modifications are a major epigenetic regulatory mechanism for phenotypic  
33  
34  
35 61 plasticity in insects. Inhibition of histone deacetylation affects developmental  
36  
37 62 plasticity both in ants (*Camponotus floridanus*) and honeybees (*Apis mellifera*) [5, 6].  
38  
39  
40 63 Genome-wide profiling of histone modifications revealed an important role of histone  
41  
42 64 H3 lysine 27 acetylation in the caste differentiation of ants [7]. Methylations of  
43  
44 65 histone H3 lysine 27 and histone H3 lysine 36 are more abundant in queen ovaries  
45  
46  
47 66 than in larvae, implying that histone methylation plays a specific role in honey bees  
48  
49  
50 67 [8]. In recent years an increasing number of publications have established histone  
51  
52 68 lysine methylation as a central epigenetic modification in regulation of chromatin and  
53  
54 69 transcription. The *SET* domain, which is observed in many histone lysine  
55  
56  
57 70 methyltransferases, is widely and probably universally distributed in metazoan  
58  
59 Evolution of *SET* Genes in Insects  
60  
61  
62  
63  
64  
65

1  
2  
3  
4  
5  
6  
7  
8  
9  
10  
11  
12  
13  
14  
15  
16  
17  
18  
19  
20  
21  
22  
23  
24  
25  
26  
27  
28  
29  
30  
31  
32  
33  
34  
35  
36  
37  
38  
39  
40  
41  
42  
43  
44  
45  
46  
47  
48  
49  
50  
51  
52  
53  
54  
55  
56  
57  
58  
59  
60  
61  
62  
63  
64  
65

71 species. This protein family typically comprises an approximately 130 amino  
72 acid-long *SET* domain, which was identified in the strongest PEV suppressor gene  
73 Su(var)3-9, in the Pc-G gene Enhancer of zeste [E(z)] and in the activating *trx-G* gene  
74 *Trithorax* of *Drosophila* [9]. The *SET* domain possesses a catalytic activity that  
75 transfers a methyl group to the amino group of lysine residues of nuclear histones  
76 from S-adenosyl-L-methionine. Based on their biochemical characteristics, *SET*  
77 domain is capable of catalyzing mono-, di- or tri-methylation of their lysine  
78 substrates. *SET* domain-dependent methylation has been identified in a wide range of  
79 lysine residues in different histones: K4 (K is the abbreviation for lysine), K9, K27,  
80 K36, and K79 in histone H3; K20 in histone H4; K59 in the globular domain of  
81 histone H4; and K26 in histone H1B [10]. Methylation of lysine residues in histone  
82 proteins is an important post-translational epigenetic event that regulates gene  
83 expression by serving as an epigenetic marker for the recruitment of complexes that  
84 participate in the organization of chromatin structure [11]. The importance of  
85 *SET*-domain containing genes is strongly supported by the involvement of this protein  
86 family in diverse biological mechanisms, such as transcriptional activation,  
87 transcriptional repression, enhancer function, mRNA splicing and DNA replication  
88 [12]. Therefore, expectedly, the regulation of various *SET*-domain containing genes  
89 are increasing correlated with diverse epigenetic phenomena which, for example,  
90 include epigenetic control in plants, centromeric gene silencing in yeasts,  
91 repeat-induced point mutations in fungi, DNA elimination in *Tetrahymena*, germline  
92 chromatin silencing in worms and heterochromatin formation in flies [13].

93 Insects constitute a remarkably diverse group of organisms that make up a vast  
94 majority of known species with their importance including biodiversity, agricultural,

Evolution of *SET* Genes in Insects

1 95 and human health concerns. The insect lineage comprises species that are both  
2 96 cosmopolitan distributed and geographically restricted, showing a broad range of  
3  
4 97 adaptation diversity. The evolutionary history of gene families is not confounded by  
5  
6  
7 98 whole-genome duplication, and the major topology of insect species is well resolved  
8  
9  
10 99 [14]. Therefore, the insect lineage offers an excellent model to study domain/gene  
11  
12 100 evolution in the context of gene family dynamics [15-19]. Insect *SET*  
13  
14 101 domain-containing genes (*SET* genes) have been identified in a limited number of  
15  
16 102 representative insect species without complicated analysis [20-22]. The *Smyd*  
17  
18 103 subfamilies of *SET* genes have expanded in a few insects from Diptera and  
19  
20 104 Hymenoptera, and several members of the *Smyd* subfamilies show significant changes  
21  
22 105 in gene expression in response to phenotypic plasticity in ants [23, 24]. However, the  
23  
24 106 evolutionary history of insect *SET* genes remains largely unknown because the *SET*  
25  
26 107 genes from a broad range of insect species have not been combined in a single  
27  
28 108 evolutionary framework. Therefore, a comprehensive study of the origin and  
29  
30 109 diversification of the *SET* gene family in insects is required. Accurate classification of  
31  
32 110 *SET*-domain containing genes can pave the fundamental way to further understanding  
33  
34 111 the epigenetic basis of gene regulation in insects.

41 112 In the present study, we aimed to ascertain the origin and diversification of *SET*  
42  
43 113 genes in insects. We searched for *SET* genes in the 130 insect genomes and the 17  
44  
45 114 arthropod genomes as outgroups. These 130 insect species include both  
46  
47 115 hemimetabolous and holometabolous insects and cover all the insect species for  
48  
49 116 which genome data have been fully available and annotated so far. Our phylogenetic  
50  
51 117 analysis revealed that an important diversification of arthropod-specific *SET* genes,  
52  
53 118 *SmydA*, occurred during insect evolution. Experimental evidence of the important

54  
55  
56  
57  
58 Evolution of *SET* Genes in Insects  
59  
60  
61  
62  
63  
64  
65

119 functions of *SmydA* genes in insects was obtained through fluorescence *in situ*  
120 hybridization, *in vitro* methyltransferase activity assay, and survival assay after  
121 expression knockdown. Furthermore, we compared the gene expression patterns and  
122 examined the selection signatures of *SmydA* genes in the four representative insects  
123 exhibiting phenotypic plasticity. These results provide insights into the regulatory  
124 roles of lineage-specific domain duplication in insect evolution.

125

## 126 **Results**

### 127 **Identification and phylogenetic classification of *SET* genes**

128 We comprehensively searched for *SET* genes in a wide range of sequenced insect  
129 species, which included 130 insect species from 14 insect orders (Supplementary  
130 Table S1). The *SET* genes were defined by the presence of the *SET* domain as  
131 predicted by the HMMER search, and their gene models were manually improved.  
132 Seventeen non-insect arthropods were also included to achieve ancestral status along  
133 with insect evolution. In total, 4,498 *SET* genes were identified in the 147 arthropod  
134 genomes (Supplementary Table S2). The genes showing potential pseudogene signals  
135 were removed in these identified *SET* genes. A database webserver  
136 (<http://159.226.67.242:8080/>) has been constructed to select, retrieve, and analyze the  
137 data in this study. In insects, the number of *SET* genes found per species ranges from  
138 16 in the scuttle fly *Megaselia scalaris* to 81 in the mosquito *Culex quinquefasciatus*  
139 (Table 1 and see Supplementary Table S3 for the full list of summary of *SET* genes in  
140 the 147 arthropod genomes). This observation suggests that the size of *SET* genes  
141 varies significantly among different insect lineages. Although the genome size of the  
142 migratory locust *Locusta migratoria* is approximately 30-fold that of the fruit fly

Evolution of *SET* Genes in Insects



143 *Drosophila melanogaster* [25] , the number of *SET* genes in locusts is comparable  
144 with that of flies. The specificity of certain substrates is reflected by the classification  
145 of *SET* genes, and *SET* genes can be classified into seven major conserved groups,  
146 namely: Suv, Ash, Trx, E(z), PRDM, SMYD, and SETD [20]. We performed  
147 phylogenetic analysis of the *SET* genes for representative species to obtain insights  
148 into the evolution of insect *SET* genes. Multiple sequence alignments of complete  
149 proteins could not accurately determine the homologous sites of *SET* genes because of  
150 the considerably different sequence lengths and domain architectures of these genes.  
151 Thus, alignment-based methods using Bayesian inferences for *SET* domain sequences  
152 and alignment-free methods based on feature frequency profiles for complete protein  
153 sequences were conducted to infer phylogenetic relationships. The overall tree  
154 topologies (Figure 1) inferred using the two methods were generally consistent. Based  
155 on the previous nomenclature system [20], the phylogenetic tree topology allows the  
156 grouping of insect *SET* genes into seven major conserved groups, generally showing  
157 slight fluctuation in the member sizes in each conserved group. The protein domains  
158 for each *SET* gene were annotated using the InterProScan package. In general, the  
159 *SET* genes in the same conserved group exhibited a similar domain composition,  
160 suggesting that the domain architectures support the conserved group classification  
161 inferred through the phylogenetic analysis. In addition to the *SET* genes in the  
162 conserved groups, a large number of *SET* genes could not be classified into known  
163 conserved groups on the basis of the phylogenetic analysis. These unclassified genes  
164 act as potential “arthropod-specific” genes. Indeed, a large number of these *SET* genes  
165 are homologous to the already defined arthropod-specific *SmydA* genes described in

166 the previous study [24]. The lineage-specificity was further verified through  
167 reciprocal BLAST search against known *SET* genes of nematodes and humans.

168

### 169 **Ancestral states of the *SET* gene family in insects**

170 A character matrix that represents the present/absent states for each *SET* homologous  
171 group (a OrthoMCL-based homolog set including both putative orthologs and  
172 paralogs) was constructed to infer the ancestral states of interior nodes along with the  
173 species tree using the Mesquite program. The ancestral states at different nodes could  
174 infer the emergences/losses of the *SET* homologous group that occurred at and above  
175 the level of orders (Figure 2). The grouping of *SET* homologous genes for each  
176 species was inferred using the OrthoMCL program with the corresponding  
177 orthologous *SET* gene in *D. melanogaster*, and the grouping reliability was supported  
178 by the phylogenetic analysis (Supplementary Figure S1–S5). The putative ancestral  
179 state was composed of 19 *SET* homologous groups present in the last common  
180 ancestor (LCA) of the studied arthropod species. Generally, the insect species  
181 possessed more *SET* homologous groups than the chelicerata species studied,  
182 suggesting that *SET* homologous groups considerably expanded during insect  
183 evolution. At the interior clades, novel *SET* homologous groups emerged several  
184 times. Only few losses of *SET* homologous groups, such as the loss of *SmydA-3*, were  
185 observed at the interior clades. The large fluctuation of *SET* homologous groups in  
186 each species indicates that these groups experienced rapid lineage-specific  
187 expansion/contraction within insect orders. For example, in Hymenoptera, the number  
188 of *SET* homologous groups ranged from 18 (covering 23 *SET* genes) in the jumping  
189 ant *Harpegnathos saltator* to 30 (covering 52 *SET* genes) in the parasitoid wasp  
Evolution of *SET* Genes in Insects

190 *Nasonia vitripennis*. In Diptera, 13 *SET* homologous groups (covering 14 *SET* genes)  
191 were found in *M. scalaris*, and the oriental fruit fly *Bactrocera dorsalis* possessed  
192 only 31 *SET* homologous groups (covering 45 *SET* genes). A large number of  
193 arthropod specific *SET* homologous groups cannot be classified into the seven major  
194 conserved groups, which revealed their origin after the emergence of main arthropod  
195 lineages. Nevertheless, at least six of these groups were present among insect species  
196 belonging to different orders, indicating their broad conservation in insects (Figure  
197 2A).

198 *SET* domains do not just function as an independent unit, as in many proteins it  
199 co-occurs with multiple other protein domains to regulate their target specificity and  
200 catalysis [12]. We surveyed the gene ontology (GO) classification of proteins by  
201 integrating biological knowledge into three hierarchies, namely, biological process,  
202 molecular function, and cellular component, to assess the function innovation of  
203 domain acquisition globally. The common GO categories included histone lysine  
204 methylation (GO:0034968), regulation of transcription (GO:0006355), protein  
205 binding (GO:0005515), nucleic acid binding (GO:0003676), and metal ion binding  
206 (GO:0046872) (Figure 3A). Partitioning of *SET* gene families between the conserved  
207 and arthropod specific groups revealed that GO categories could be shared between  
208 the two groups or be assigned exclusively to one group. The GO categories, which  
209 were only exclusive in the arthropod specific groups, included RNA  
210 methyltransferase activity (GO:0008173), metalloproteinase activity  
211 (GO:0004181), lysozyme activity (GO:0003796), homophilic cell adhesion  
212 (GO:0007156), sulfotransferase activity (GO:0008146) and so on.

213

Evolution of *SET* Genes in Insects

## 214 **Emergence of arthropod lineage-specific *SET* gene families**

215 Pairwise BLAST search against all the *SET* genes indicated that the arthropod specific  
216 *SET* genes showed considerable amino acid similarity to the SMYD groups, which  
217 contain a conserved core consisting of a *SET* domain and a MYND (Myeloid  
218 translocation protein, Nervy, Deaf) zinc finger domain [26]. The arthropod specific  
219 *SET* genes also contain the *SET* and MYND domains and were named *SmydA* [24].  
220 We performed the phylogenetic analysis of the SMYD genes through Bayesian  
221 inferences. The majority of the SMYD genes could be classified into 11 monophyletic  
222 clades, which exhibited similar high Bayesian posterior probability values (Figure  
223 3B). In a global view, these SMYD genes fell into two distinct branches, which  
224 correspond with the conserved SMYD and *SmydA* groups. These results could  
225 exclude the possibility that the *SmydA* groups have raised from multiple independent  
226 gain events by duplications from deeply diverged SMYD genes of insects. Indeed, as  
227 shown in Figure 2A, *SmydA* genes were absent from in all Chelicerata species  
228 investigated but present in the genomes of crustacean species and insect species,  
229 suggesting that *SmydA* genes may have originated prior to the divergence of Crustacea  
230 and Insecta. *SmydA-1*, *SmydA-2*, *SmydA-3*, and *SmydA-6* were already present before  
231 the split of Crustacea with other insects, showing clues for their ancient duplication  
232 events. The strong support for distinct individual lineages of paralogous genes implied  
233 that multiple duplications occurred within the order level; the most notable case was  
234 the detection of three copies of *SmydA-3* in the red flour beetle *Tribolium castaneum*  
235 (Supplementary Table 2). *SmydA-1/SmydA-4* and *SmydA-6* were subjected to  
236 additional rounds of duplication in Lepidoptera and Orthoptera, respectively. The  
237 genes annotated as *SmydA-8* and *SmydA-9* in *D. melanogaster* previously formed a

Evolution of *SET* Genes in Insects

1  
2  
3  
4  
5  
6  
7  
8  
9  
10  
11  
12  
13  
14  
15  
16  
17  
18  
19  
20  
21  
22  
23  
24  
25  
26  
27  
28  
29  
30  
31  
32  
33  
34  
35  
36  
37  
38  
39  
40  
41  
42  
43  
44  
45  
46  
47  
48  
49  
50  
51  
52  
53  
54  
55  
56  
57  
58  
59  
60  
61  
62  
63  
64  
65

238 single clade alone with a high Bayesian posterior probability value (0.99), suggesting  
239 a specific duplication event in *Drosophila*. Therefore, the *SmydA* groups differed  
240 considerably in the number of genes in each insect order, implying the complexity of  
241 their evolutionary histories.

242 To shed light into the evolutionary history of *SmydA* genes, we determined the  
243 location and gene order of *SmydA* genes in the four holometabolous species with  
244 available chromosome-level genome assemblies or genome-scale genetic linkage  
245 maps (Figure 3C). In Diptera, the syntenic gene orders could be inferred from the four  
246 ancient *SmydA* genes, namely, *SmydA-1*, *SmydA-2*, *SmydA-3*, and *SmydA-6*, all of  
247 which may have been present in the ancestor of insects and crustaceans. An  
248 insect-specific *SmydA-9* could be observed in the majority of insect orders, including  
249 both hemimetabolous and holometabolous insects. *SmydA-9* showed syntenic  
250 conservation with the four ancient genes. This gene order was also conserved when  
251 *SmydA* genes in insects distantly related from other insect orders were examined.  
252 Almost all of the five synteny-anchoring genes were maintained in both the  
253 coleopteran species *T. castaneum* and hymenoptera species *A. mellifera*, with an  
254 exception of *SmydA-2* that was missed in *A. mellifera*. In contrast to those in *T.*  
255 *castaneum* and *A. mellifera*, the reversed order of *SmydA-3* and *SmydA-6* in Dipteran  
256 species implies that an intrachromosome transfer event of genomic segments occurred  
257 before the emergence of Diptera. Duplication events could also occur in the early  
258 diversification of arthropod species. No orthologous *SmydA-4* gene was detected the  
259 chelicerata species, indicating that duplication event contributes to the emergence of  
260 *SmydA-4* gene in Pancrustacea species. *SmydA-4* was present in all the  
261 hemimetabolous insect orders studied, as well as in the holometabolous insect orders

1  
2  
3  
4  
5  
6  
7  
8  
9  
10  
11  
12  
13  
14  
15  
16  
17  
18  
19  
20  
21  
22  
23  
24  
25  
26  
27  
28  
29  
30  
31  
32  
33  
34  
35  
36  
37  
38  
39  
40  
41  
42  
43  
44  
45  
46  
47  
48  
49  
50  
51  
52  
53  
54  
55  
56  
57  
58  
59  
60  
61  
62  
63  
64  
65

262 Lepidoptera, Coleoptera, and Diptera. The absence of *SmydA-4* in all the 32  
263 hymenopteran species suggested that subsequent loss of *SmydA-4* could be traced  
264 back to the ancestor of the hymenopteran lineage before the divergence of wasp, ants,  
265 and bees. In the SMYD phylogenetic tree, the Bayesian inferences supported the  
266 grouping of *SmydA-3*, *SmydA-4*, and *SmydA-6*. Three of the four species exhibited a  
267 accordant location of *SmydA-3/SmydA-4/SmydA-6* in the syntenic regions. In addition  
268 to the old duplication events that categorized the divergent duplicates into distinct  
269 *SmydA* subfamilies (e.g., *SmydA-3* and *SmydA-4*), recent duplications within an insect  
270 order were also observed. The three copies of *SmydA-3* in *T. castaneum*, which  
271 spanned within a 4.2 kb genomic region, were observed in tandem array between the  
272 two syntenic genes *SmydA-1* and *SmydA-6*. The closeness in protein sequence and  
273 genomic location implies an evolutionary origin of these three copies of *SmydA-3* via  
274 local duplication. Overall, our data suggest that the order of *SmydA* genes was  
275 conserved over a remarkable wide range of holometabolous insect orders.

### 277 **Selective pressures acting on *SmydA* genes**

278 Functional differentiations or mutations leading to pseudogene formation are the two  
279 major causes for sequence divergence between new duplicates and their orthologous  
280 counterpart. Synonymous substitutions are assumed to accumulate at a constant rate;  
281 hence, the ratios of nonsynonymous substitution per nonsynonymous site ( $d_N$ ) to  
282 synonymous substitution per synonymous site ( $d_S$ ) are deemed to be an indicator to  
283 measure the relative rates of evolution for protein sequences. The four genes  
284 (ACYPI26757 and ACYPI55839 in *Acyrtosiphon pisum*; Px015362.1 and  
285 Px001029.1 in *Plutella xylostella*) showing signals of recombination were removed

1  
2  
3  
4  
5  
6  
7  
8  
9  
10  
11  
12  
13  
14  
15  
16  
17  
18  
19  
20  
21  
22  
23  
24  
25  
26  
27  
28  
29  
30  
31  
32  
33  
34  
35  
36  
37  
38  
39  
40  
41  
42  
43  
44  
45  
46  
47  
48  
49  
50  
51  
52  
53  
54  
55  
56  
57  
58  
59  
60  
61  
62  
63  
64  
65

286 from the further selection analysis. We estimated a global  $d_N/d_S$  ratio (one ratio, model  
287 M0) for these *SET* genes to determine whether the *SmydA* genes have been under  
288 different selection pressures than the other conserved *SET* genes. The  $d_N/d_S$  ratios ( $\omega$   
289 =  $d_N/d_S$  ratio) of *SET* genes varied from low (0.0007, Ez, CG6502) to high (0.1627,  
290 *Smyd4-1*, CG1868), indicating a variance in the rates of protein evolution on different  
291 *SET* genes (Table 2). The  $\omega$  values among the conserved *SET* genes (excluding the  
292 SMYD genes) ranged from 0.0007 to 0.0624 (mean  $\omega$  = 0.0185). The conserved  
293 SMYD and *SmydA* groups showed  $\omega$  values in the ranges of 0.055–0.1627 (mean  $\omega$  =  
294 0.1020) and 0.0052–0.1623 (mean  $\omega$  = 0.0884), respectively. Overall, both the  
295 conserved SMYD and *SmydA* ( $P$  = 0.0003 and  $P$  = 0.0178, Wilcoxon signed-rank  
296 tests with Bonferroni correction, respectively) groups exhibited significantly higher  $\omega$   
297 values than the conserved *SET* genes (Figure 3D). However, the distributions of  $\omega$   
298 values of the conserved SMYD and *SmydA* groups were statistically indistinguishable  
299 ( $P$  = 1.0000, Wilcoxon signed-rank tests with Bonferroni correction).

300

### 301 **Function approval of *SmydA* genes**

302 We attempted to determine whether the *SmydA* genes retained histone methylation  
303 activities to approve the non-pseudogenization process of these genes. We expressed  
304 *SmydA-2* as a randomly selected representative and performed *in vitro* histone  
305 methylation activity assays using histones as substrates in the migratory locust. As  
306 shown in Figure 4A, Western blot analysis detected increased lysine methylation on  
307 histone H3 compared with the controls, indicating that *SmydA-2* possesses  
308 methyltransferase activity on histones. Similar to that of the other conserved SMYD  
309 genes, the methyltransferase activity of *SmydA-2* was also dependent on S-adenosyl  
Evolution of *SET* Genes in Insects

1  
2  
3  
4  
5  
6  
7  
8  
9  
10  
11  
12  
13  
14  
15  
16  
17  
18  
19  
20  
21  
22  
23  
24  
25  
26  
27  
28  
310 methionine. Fluorescence *in situ* hybridization analysis provided further tissue  
311 expression evidence to support the reliability of the *SmydA-2* gene function. Obvious  
312 fluorescence signals were observed in the brain and epidermal cells of cuticle in the  
313 locusts (Figure 4B). These cells did not show any hybridization signal for the negative  
314 controls. The origin and evolution of new emerging genes undergo an increased  
315 expression breadth of new duplicated genes over evolutionary time [27, 28]. Thus, we  
316 determined the expression levels of the *SmydA-2* gene using quantitative real-time  
317 polymerase chain reaction (qPCR) analysis in the different tissues. qPCR data showed  
318 that the *SmydA-2* gene was expressed in a broad range of tissues, including brains,  
319 testes, ovaries, cuticles, and legs (Figure 4C). The broad expression pattern suggests  
320 that the *SmydA-2* gene is less tissue specific and may serve as a functional gene in  
321 multiple tissues [28].

29  
30  
31  
32  
33  
34  
35  
36  
37  
38  
39  
40  
41  
42  
43  
44  
45  
46  
47  
48  
49  
50  
51  
52  
53  
54  
55  
56  
57  
58  
59  
60  
61  
62  
63  
64  
65  
322 Essential genes are often considered as conserved and functionally important [29] ,  
323 whereas pseudogenes have been considered to be more dispensable and to have minor  
324 influences on survival and phenotype. To determine whether the *SmydA-2* gene plays  
325 an essential role during development [30], we knocked its expression down by using  
326 RNA interferences in the locusts. Compared with the controls, the relative mRNA  
327 level of the *SmydA-2* gene decreased by approximately 70% after injecting  
328 double-strand RNAs (Supplementary Figure S6). After injection of *dsSmydA-2*, we  
329 observed large numbers of dead locusts, which did not display obvious defect  
330 phenotype. As shown in Figure 4D, Kaplan–Meier survival estimates indicate that  
331 injection of locusts with *dsSmydA-2* significantly increased mortality when compared  
332 with the controls ( $\chi^2 = 6.260$ ,  $df = 1$ ,  $P = 0.0123$ , Chi-square tests).



334 **Expression and selection analysis of *SmydA* genes in response to phenotypic plasticity**  
1  
2 335 Epigenetic reprogramming that modifies chromatin structure through histone  
3  
4 336 modifiers contributes to orchestrate the generation and maintenance of phenotypic  
5  
6  
7 337 plasticity, which is a key trait for the success of insects. Therefore, we compared the  
8  
9 338 expression patterns of histone-modifier *SET* genes in four representative insects  
10  
11 339 exhibiting phenotypic plasticity, namely, locust density-dependent behavior, aphid  
12  
13 340 seasonal morphs, dietary-mediated interactions of bees and ants. Specially, we  
14  
15 341 performed differential expression analysis between gregarious and solitary locusts,  
16  
17 342 between asexual and sexual morphs in *A. pisum*, between queens and workers in *A.*  
18  
19 343 *mellifera*, and between large workers and queens in *Acromyrmex echinator*. In all the  
20  
21 344 four species, a number of differentially expressed genes (DEGs) were detected  
22  
23 345 between the two alternative phenotypes using the criteria of a false discovery rate  
24  
25 346 (FDR)-corrected  $P < 0.05$ . In terms of DEG number, a large portion of *SET* genes  
26  
27 347 showed significant changes in gene expression (12 in 29, 41%, in *A. mellifera*; 23 in  
28  
29 348 62, 37%, in *A. pisum*; 11 in 29, 38%, in *L. migratoria*; and 10 in 27, 37%, in *A.*  
30  
31 349 *echinator*). Compared with that of the DEGs observed at the genome-wide level  
32  
33 350 (DEGs in total), the number changes of the DEGs in *SET* genes in the four insects  
34  
35 351 were even more prominent, emphasizing the important regulatory role of *SET* genes  
36  
37 352 in phenotypic transition ( $P_s < 0.05$ , Chi-square tests). Overlapping of the  
38  
39 353 differentially expressed *SET* genes derived from the same ortholog could provide a  
40  
41 354 clue of their convergent function in phenotypic transition. We found two *SET* genes,  
42  
43 355 namely, *Set2* and *SmydA-5*, showed significant changes in gene expression  
44  
45 356 simultaneously in three of the four insect species studied.  
46  
47  
48  
49  
50  
51  
52  
53  
54  
55  
56  
57  
58  
59  
60  
61  
62  
63  
64  
65

Evolution of *SET* Genes in Insects

1  
2  
3  
4  
5  
6  
7  
8  
9  
10  
11  
12  
13  
14  
15  
16  
17  
18  
19  
20  
21  
22  
23  
24  
25  
26  
27  
28  
29  
30  
31  
32  
33  
34  
35  
36  
37  
38  
39  
40

357 Assuming that a non-pseudogene gene should not be randomly expressed, we  
358 compared the expression pattern of the duplication-derived *SmydA* genes to their  
359 derived ancestral SMYD genes in response to environment-dependent phenotypic  
360 plasticity (Figure 5). The majority of *SET* genes from the conserved SMYD (33 in 34  
361 in total, 97%) and *SmydA* (13 in 17 in total, 76%) groups were expressed in at least  
362 one insect. No significant differences ( $P = 0.749$ , Chi-Square tests) in the number of  
363 expressed genes were observed between the two groups. A number of DEGs were  
364 detected in both the conserved SMYD and *SmydA* groups in the four insect species.  
365 All the four *SmydA* genes in *A. echinator* were also differentially expressed. We also  
366 obtained significant results in three of the six *SmydA* genes of *L. migratoria* and in  
367 two of the five *SmydA* genes of *A. mellifera* between the two alternative phenotypes.  
368 The DEG number in the *SmydA* groups did not show significant deviation from those  
369 in the conserved SMYD group in the four insects ( $P_s > 0.2$ , Fisher's exact tests). This  
370 result suggests that the *SmydA* genes might not be randomly expressed and that they  
371 did not represent pseudogenes or transcriptional byproducts. Thus, the *SmydA* genes  
372 may preserve a regulatory role, indicating the function similarity to their ancestral  
373 SMYD genes.

41  
42  
43  
44  
45  
46  
47  
48  
49  
50  
51  
52  
53  
54  
55  
56  
57  
58  
59  
60  
61  
62  
63  
64  
65

374 The free ratio model of *SmydA* genes fitted the data significantly better than the  
375 one model (model M0) using likelihood ratio tests ( $P_s < 0.001$ ), indicating  
376 heterogeneous rates of sequence evolution along the gene tree of *SmydA* genes.  
377 Therefore, we tested whether the differentially expressed *SmydA* genes between  
378 alternative phenotypes (foreground branches) evolved under different selective  
379 pressures than those in the remaining branches (background branch) (Supplementary  
380 Figure S7). The branch model was much better supported by the data than the model

1  
2  
3  
4  
5  
6  
7  
8  
9  
10  
11  
12  
13  
14  
15  
16  
17  
18  
19  
20  
21  
22  
23  
24  
25  
26  
27  
28  
29  
30  
31  
32  
33  
34  
35  
36  
37  
38  
39  
40  
41  
42  
43  
44  
45  
46  
47  
48  
49  
50  
51  
52  
53  
54  
55  
56  
57  
58  
59  
60  
61  
62  
63  
64  
65

381 M0 for *SmydA-5* in *A. mellifera* and *SmydA-1* in *L. migratoria* (Table 3). Fixing  $\omega = 1$   
382 for the foreground branch did not result in an improved fit over the branch model with  
383 the unconstrained foreground branch (the null neutral model and the alternative  
384 model). This result suggests that the  $\omega$  values in the external branch were smaller than  
385 1 for *SmydA-3* and *SmydA-5* in *A. mellifera*, *SmydA-1* in *L. migratoria*, and *SmydA-3*  
386 in *A. echinator*. Only *SmydA-1* in *L. migratoria* exhibited elevated  $\omega$  values, and a  
387 branch-site model allowing heterogeneous  $\omega$  values across sequences and branches  
388 identified four sites (5M, 11K, 93P, and 105C) under positive selection.

389

## 390 **Discussion**

391 In this study, the phylogenetic analyses allowed the subdivision of the insect *SET*  
392 genes into seven major conserved groups and one arthropod-specific *SmydA* group.  
393 We inferred many *SmydA* gene duplication events along insect evolution, suggesting  
394 an important diversification of the *SmydA* genes occurred during insect evolutionary  
395 processes. With the *SmydA-2* genes in locusts as representatives, the maintenance of  
396 essential gene function was confirmed from the experimental evidence of *in vitro*  
397 methyltransferase activity, *in situ* mRNA expression, and phenotypes after expression  
398 knockdown. Based on the examination of distribution pattern and selection signatures  
399 across insects, our data indicated that extensive pseudogenization unlikely occurred  
400 for the *SmydA* genes. Finally, the transcriptome analyses of the four insects showed  
401 that several *SmydA* genes are involved in insect phenotype plasticity, suggesting that  
402 *SmydA* genes contributed novelties for insect adaptive evolution. This data suggests a  
403 role of diverged regulatory functions after their duplication in insects.

Evolution of *SET* Genes in Insects

1  
2  
3  
4  
5  
6  
7  
8  
9  
10  
11  
12  
13  
14  
15  
16  
17  
18  
19  
20  
21  
22  
23  
24  
25  
26  
27  
28  
29  
30  
31  
32  
33  
34  
35  
36  
37  
38  
39  
40  
41  
42  
43  
44  
45  
46  
47  
48  
49  
50  
51  
52  
53  
54  
55  
56  
57  
58  
59  
60  
61  
62  
63  
64  
65

404 A recent study has provided a framework for understanding the evolution history  
405 of SMYD gene family in representative animal phyla [24]. The phylogenetic results  
406 show that the metazoan SMYD genes can be classified in three main classes, *Smyd3*,  
407 *Smyd5* and *Smyd4*. Two sub-classes of SMYD genes, namely *Smyd4-4* and *SmydA*,  
408 are absent in vertebrates; the former one is insect-specific and the later one is  
409 arthropod-specific. Within Chelicerata, we detected *Smyd4-4* in Acariform mites  
410 (non-insect arthropods), suggesting our evidence did not support the point that  
411 *Smyd4-4* is specific of insects. Since Chelicerata represents an out-group branch for  
412 this study, further studies covering more basal branches of arthropod phylogeny are  
413 required to ascertain the origin of *Smyd4-4*. *SmydA* genes represent a class of  
414 arthropod-specific genes that are only present in the LCA of insect species and  
415 crustacean species, suggesting their origin after the split of chelicerates from  
416 Pancrustacea species. Conservation of five ancient *SmydA* genes in a wide range of  
417 species suggests they probably originated from duplication events of conserved  
418 SMYD genes predating the diversification of insects. Although a few cases of  
419 whole-genome duplication have been documented in chelicerates, evidence that  
420 whole-genome duplication occurs widely in arthropod evolution remains lacking [31].  
421 Therefore, gene duplication rather than whole-genome duplication possibly leads to  
422 the emergence of multiple copies of ancient *SmydA* genes in the LCA of Pancrustacea  
423 species. The clear split of conserved SMYD and *SmydA* genes excluded the  
424 possibility that multiple independent duplication events from conserved SMYD genes  
425 resulted in the current repertoire of *SmydA* genes in insects. This result suggests that  
426 the five ancient *SmydA* genes were first produced from a single ancestral gene, which  
427 was derived from conserved SMYD genes. The five ancient *SmydA* genes were thus

Evolution of *SET* Genes in Insects

1  
2  
3  
4  
5  
6  
7  
8  
9  
10  
11  
12  
13  
14  
15  
16  
17  
18  
19  
20  
21  
22  
23  
24  
25  
26  
27  
28  
29  
30  
31  
32  
33  
34  
35  
36  
37  
38  
39  
40  
41  
42  
43  
44  
45  
46  
47  
48  
49  
50  
51  
52  
53  
54  
55  
56  
57

428 the source from which insect-specific *SmydA* duplications were subsequently  
429 produced in insects. Determining the location and order of multiple gene members at  
430 the genomic scale sheds light on the evolutionary history of gene family. The closely  
431 linked manner in genomic location suggests that homologous recombination and  
432 functional differentiation may be a major force to shape the evolution of *SmydA* genes  
433 in insects. For instance, in dipteran and lepidopteran insects, homologous  
434 recombination may give rise to *SmydA-6* via the duplication events of *SmydA-3*  
435 because *SmydA-3* and *SmydA-6* were in close proximity to each other in both genomic  
436 location and phylogenetic trees. The tandem organization of three *SmydA-3* copies in  
437 *T. castaneum* may also result from species-specific duplications via homologous  
438 recombination. Retrotransposition events may represent another contributing force for  
439 generating unlinked *SmydA* genes; these events can also generate intronless  
440 retroposed gene copies [32]. However, the retrotransposition events could not be  
441 inferred from the presence of signature of intron–exon structure because of the  
442 subsequent insertion in deeply diverged duplicates, such as *SmydA-5*. Conserved gene  
443 orders between species from Lepidoptera, Coleoptera, and Diptera revealed a high  
444 degree of macrosyntenic gene order of the five ancient *SmydA* genes during  
445 approximately 348 million years of evolutions splitting these insects [33]. This  
446 observation implies strong constraints for preserving the conserved gene order of  
447 *SmydA* genes in insects. Currently, whether this macro-syntenic gene order is  
448 preserved outside holometabolous insects cannot be determined because  
449 chromosome-level genome assemblies or genome-scale genetic linkage maps are not  
450 available in hemimetabolous insects. This issue would be addressed when the genome  
451 assembly is considerably improved in the future.

58 Evolution of *SET* Genes in Insects  
59  
60  
61  
62  
63  
64  
65

1  
2  
3  
4  
5  
6  
7  
8  
9  
10  
11  
12  
13  
14  
15  
16  
17  
18  
19  
20  
21  
22  
23  
24  
25  
26  
27  
28  
29  
30  
31  
32  
33  
34  
35  
36  
37  
38  
39  
40  
41  
42  
43  
44  
45  
46  
47  
48  
49  
50  
51  
52  
53  
54  
55  
56  
57  
58  
59  
60  
61  
62  
63  
64  
65

452 Selective pressures were significantly weaker for the SMYD genes than for the  
453 six conserved groups (Suv, Ash, Trx, E(z), PRDM, and SETD). Compared with the  
454 six conserved groups, SMYD genes were the least conserved gene group and,  
455 concordantly, the least constrained one. Nevertheless, the  $\omega$  values of SMYD genes  
456 ranged from 0.0052 for *SmydA-2* to 0.1627 for *Smyd4-1*.  $\omega \ll 1$  was consistent with  
457 their broad conservation across insects, implying their essential functional roles. This  
458 observation suggests that purifying selection is the main force governing the evolution  
459 of SMYD genes. The distributions of  $\omega$  values of the conserved SMYD and *SmydA*  
460 genes were statistically indistinguishable, indicating a symmetrical rate of sequence  
461 evolution. Thus, purifying selection is subject to the conserved SMYD and *SmydA*  
462 genes, but their intensity may be relaxed compared with other *SET* genes. Both the  
463 GO analysis and the *in vitro* methyltransferase activity assay suggest that *SmydA*  
464 genes, similar to their conserved SMYD ancestors, are sufficient to perform the  
465 original function relating to histone methylation [34]. GO ontology analysis implied  
466 that the *SmydA* genes have developed to acquire novel functions. These functions  
467 were absent in the conserved SMYD genes, indicating that the *SmydA* genes may have  
468 undergone functional differentiation. Gene duplications that occurred in specific  
469 lineages are important in contributing to lineage-specific adaptive processes [35].  
470 After gene duplication, purifying selection is expected in both gene copies if  
471 duplication can confer a selective advantage [36]. By contrast, one of the two copies  
472 can evolve either under relaxed purifying selection when no immediate advantage is  
473 shown from gene duplication or under positive selection when a new function is  
474 acquired via advantageous mutations [37]. Overall, these data suggest that the *SmydA*  
475 genes may not represent redundant gene copies that are under pseudogenization.

Evolution of *SET* Genes in Insects

1  
2  
3  
4  
5  
6  
7  
8  
9  
10  
11  
12  
13  
14  
15  
16  
17  
18  
19  
20  
21  
22  
23  
24  
25  
26  
27  
28  
29  
30  
31  
32  
33  
34  
35  
36  
37  
38  
39  
40  
41  
42  
43  
44  
45  
46  
47  
48  
49  
50  
51  
52  
53  
54  
55  
56  
57  
58  
59  
60  
61  
62  
63  
64  
65

476 Several members of the SMYD family of histone methyltransferases have  
477 undergone a dramatic expansion in the insect lineage [23]. These SMYD genes were  
478 identified as caste-specific genes in ants (*Harpegnathos saltator*), suggesting that  
479 these histone modifiers play dedicated regulatory roles in insect phenotypic plasticity.  
480 However, the biological significance of the differential expressions of these genes  
481 remains unknown [38]. Our study further verified the presence of the differential  
482 expression patterns of the SMYD genes in the four other insects that also possessed  
483 adaptive phenotypic plasticity. Consequently, the understanding of convergent  
484 regulatory roles of the SMYD genes in insect phenotypic plasticity was extended.  
485 Histone lysine methyltransferase catalyzes methyl group transfer to the amino group  
486 of lysine residues of histones by means of the *SET* domain, a domain presented within  
487 many proteins that regulate diverse development processes [39]. Histone lysine  
488 methylation on specific residues is associated with distinct signatures of gene  
489 expression, thereby serving as a chromatin modulator for epigenetic regulation [40].  
490 Future studies should understand how the expanded SMYD gene family can quickly  
491 become essential and identify the roles of the duplicated SMYD genes in insects,  
492 despite the expectation of redundant functionality at the beginning of new duplicated  
493 gene evolution [30].

494

## 495 **Materials and Methods**

### 496 **Identification of insect *SET* genes**

497 Genome assemblies and official gene sets of 130 insect species, including 62 dipteran  
498 insects, 33 hymenopteran insects, 10 hemipteran insects, 7 coleopteran species, 9  
499 lepidopteran insects, and representatives from Orthoptera, Phthiraptera,

Evolution of *SET* Genes in Insects

1  
2  
3  
4  
5  
6  
7  
8  
9  
10  
11  
12  
13  
14  
15  
16  
17  
18  
19  
20  
21  
22  
23  
24  
25  
26  
27  
28  
29  
30  
31  
32  
33  
34  
35  
36  
37  
38  
39  
40  
41  
42  
43  
44  
45  
46  
47  
48  
49  
50  
51  
52  
53  
54  
55  
56  
57  
58  
59  
60  
61  
62  
63  
64  
65

500 Phasmatoptera, Trichoptera, Thysanoptera, Isoptera, Blattodea, Ephemeroptera and  
501 Odonata, were obtained from their respective genome databases (Supplementary  
502 Table S1). Among the basal arthropod species, we included 17 arthropod genomes  
503 from 10 chelicerate species, five crustacean species and two non-insect hexapod  
504 species.

505 The hidden Markov model-based HMMER program was used to identify the *SET*  
506 domain containing proteins using PF00856 in the Pfam database with a conditional  
507 E-value cutoff of  $1e-5$  [41, 42]. Despite that the *SET* domain can be detected in their  
508 homologs in closely related species, the genes lacking SET domain were considered  
509 as deprived of lysine methylation capacity and were excluded for further analysis. The  
510 resulting genes with stop codons or frameshift mutations were subsequently manually  
511 checked. The obvious incorrect gene models were improved with transcriptome data  
512 through the GeneWise version 2.2.0 program [43]. The PSILC version 1.21 program  
513 was used to identify the potential pseudogenes [44]. Gene Ontology (GO) categories  
514 were determined via scanning protein sequences against Interpro member databases  
515 using various profile-based and hidden Markov models in the InterProScan version  
516 5.13-52.0 package [45]. The member database binaries and models include  
517 TIGRFAM, ProDom, Panther, SMART, PrositePatterns, SuperFamily, PRINTS,  
518 Gene3d, PIRSF, PfamA and PrositeProfiles.

#### 519 520 **Phylogenetic analysis, ancestral state reconstructions, and tests for selection**

521 Alignment-based methods using Bayesian inferences for *SET* domain sequences and  
522 alignment-free methods based on feature frequency profiles for complete protein  
523 sequences were used to infer phylogenetic relationships of *SET* genes across insects.

Evolution of *SET* Genes in Insects



1  
2  
3  
4  
5  
6  
7  
8  
9  
10  
11  
12  
13  
14  
15  
16  
17  
18  
19  
20  
21  
22  
23  
24  
25  
26  
27  
28  
29  
30  
31  
32  
33  
34  
35  
36  
37  
38  
39  
40  
41  
42  
43  
44  
45  
46  
47  
48  
49  
50  
51  
52  
53  
54  
55  
56  
57  
58  
59  
60  
61  
62  
63  
64  
65

524 Multiple alignments were generated using the MAFFT alignment software [46].  
525 According to the Akaike information criterion, the model of molecular evolution with  
526 the best fit to the data was determined by using the ProtTest 3.4.2 software [47].  
527 Bayesian reconstruction of phylogeny was conducted using the MrBayes 3.2.1  
528 software for 10,000,000 generations [48]. The first 25% of the trees were discarded as  
529 burn-in. The alignment-free and distance-based methods for phylogenetic tree  
530 building were implemented by means of the feature frequency profile method with the  
531 FFP version 3.19 suite (<http://sourceforge.net/projects/ffp-phylogeny/>), utilizing the  
532 FFPaa program for amino acid sequences with a word length of  $L = 5$ . The FFPboot  
533 program was used for bootstrap analysis of the tree generated for 100 replicates.

534 We constructed a character matrix that represents present/absent states for each  
535 *SET* homologous group to reconstruct the ancestral states of interior clades. We did  
536 not consider member number variation and considered only the binary state, presence  
537 or absence, of a given *SET* homologous group in any given node. The grouping of the  
538 *SET* genes was inferred from the OrthoMCL software with the corresponding  
539 orthologous *SET* gene in *D. melanogaster*. Ancestral state reconstruction was  
540 implemented in the Mesquite program (<http://mesquiteproject.org/>) under maximum  
541 likelihood optimization using Markov k-state 1 parameter model. After ancestral  
542 reconstruction, we measured emergence and loss events of *SET* homologous group  
543 along each branch in the phylogenetic tree. The emergence event of *SET* homologous  
544 group was defined as the *SET* homologous group was absent at the ancestral nodes of  
545 a given node and either of the outgroups This process requires a phylogeny tree of all  
546 the species studied. Single-copy orthologous gene families were inferred from the  
547 benchmarking universal single-copy ortholog BUSCO gene sets from each species

Evolution of *SET* Genes in Insects

1  
2  
3  
4  
5  
6  
7  
8  
9  
10  
11  
12  
13  
14  
15  
16  
17  
18  
19  
20  
21  
22  
23  
24  
25  
26  
27  
28  
29  
30  
31  
32  
33  
34  
35  
36  
37  
38  
39  
40  
41  
42  
43  
44  
45  
46  
47  
48  
49  
50  
51  
52  
53  
54  
55  
56  
57  
58  
59  
60  
61  
62  
63  
64  
65

548 [49]. The resulting 527 single-copy orthologous (completed genes in BUSCO) gene  
549 families were used to construct the neighbor-joining species tree, which is consistent  
550 with the phylogenomic tree recently inferred from transcriptome data [14]. The  
551 neighbor-joining species tree was constructed from amino acid sequences of  
552 single-copy orthologs using Phylip version 3.69 package. The bootstrap values,  
553 calculated from 100 replicates using the seqboot, protdist, neighbor and consense  
554 programs of Phylip package.

### 556 **Expression of SMYD family genes in response to phenotypic plasticity**

557 The transcriptome data for gregarious and solitary locusts in *L. migratoria*, asexual  
558 and sexual morphs in *A. pisum*, queens and workers in *A. mellifera*, and minor and  
559 major workers in *A. echinator* were retrieved from the NCBI database under  
560 accession numbers PRJNA79681, GSE56830, GSE61253, and GSE51576,  
561 respectively. The raw reads were preprocessed to remove adapters and low-quality  
562 bases using the Trimmomatic software; these reads were then mapped to the genome  
563 assembly (genome assembly version: v2.4 for *L. migratoria*, v1.0 for *A. pisum*,  
564 Amel\_2.0 for *A. mellifera* and Aech\_v2.0 for *A. echinator*, respectively) using the  
565 Tophat2 version 2.0.14 software [50, 51]. Raw counts of each gene were calculated  
566 and annotated using the HT-seq version 0.6.1 package in Python, and the trimmed  
567 mean of M value normalization method was used to normalize raw counts [52].  
568 Differential expression analysis was performed using the edgeR version 3.8.0 package  
569 at an FDR cut-off of 0.05 [53].

570  
571  
572  
573  
574  
575  
576  
577  
578  
579  
580  
581  
582  
583  
584  
585  
586  
587  
588  
589  
590  
591  
592  
593  
594  
595  
596  
597  
598  
599  
600  
601  
602  
603  
604  
605  
606  
607  
608  
609  
610  
611  
612  
613  
614  
615  
616  
617  
618  
619  
620  
621  
622  
623  
624  
625  
626  
627  
628  
629  
630  
631  
632  
633  
634  
635  
636  
637  
638  
639  
640  
641  
642  
643  
644  
645  
646  
647  
648  
649  
650  
651  
652  
653  
654  
655  
656  
657  
658  
659  
660  
661  
662  
663  
664  
665  
666  
667  
668  
669  
670  
671  
672  
673  
674  
675  
676  
677  
678  
679  
680  
681  
682  
683  
684  
685  
686  
687  
688  
689  
690  
691  
692  
693  
694  
695  
696  
697  
698  
699  
700  
701  
702  
703  
704  
705  
706  
707  
708  
709  
710  
711  
712  
713  
714  
715  
716  
717  
718  
719  
720  
721  
722  
723  
724  
725  
726  
727  
728  
729  
730  
731  
732  
733  
734  
735  
736  
737  
738  
739  
740  
741  
742  
743  
744  
745  
746  
747  
748  
749  
750  
751  
752  
753  
754  
755  
756  
757  
758  
759  
760  
761  
762  
763  
764  
765  
766  
767  
768  
769  
770  
771  
772  
773  
774  
775  
776  
777  
778  
779  
780  
781  
782  
783  
784  
785  
786  
787  
788  
789  
790  
791  
792  
793  
794  
795  
796  
797  
798  
799  
800  
801  
802  
803  
804  
805  
806  
807  
808  
809  
810  
811  
812  
813  
814  
815  
816  
817  
818  
819  
820  
821  
822  
823  
824  
825  
826  
827  
828  
829  
830  
831  
832  
833  
834  
835  
836  
837  
838  
839  
840  
841  
842  
843  
844  
845  
846  
847  
848  
849  
850  
851  
852  
853  
854  
855  
856  
857  
858  
859  
860  
861  
862  
863  
864  
865  
866  
867  
868  
869  
870  
871  
872  
873  
874  
875  
876  
877  
878  
879  
880  
881  
882  
883  
884  
885  
886  
887  
888  
889  
890  
891  
892  
893  
894  
895  
896  
897  
898  
899  
900  
901  
902  
903  
904  
905  
906  
907  
908  
909  
910  
911  
912  
913  
914  
915  
916  
917  
918  
919  
920  
921  
922  
923  
924  
925  
926  
927  
928  
929  
930  
931  
932  
933  
934  
935  
936  
937  
938  
939  
940  
941  
942  
943  
944  
945  
946  
947  
948  
949  
950  
951  
952  
953  
954  
955  
956  
957  
958  
959  
960  
961  
962  
963  
964  
965  
966  
967  
968  
969  
970  
971  
972  
973  
974  
975  
976  
977  
978  
979  
980  
981  
982  
983  
984  
985  
986  
987  
988  
989  
990  
991  
992  
993  
994  
995  
996  
997  
998  
999  
1000

Evolution of *SET* Genes in Insects

**571 Function approval of *SmydA-2* genes via experimental evidence**

1  
2 572 A fluorescence *in situ* analysis of *SmydA-2* was performed on the brains and  
3  
4  
5 573 integuments of locust nymphs. Biotin-labeled antisense and sense probes  
6  
7 574 (Supplementary Table S4) of *SmydA-2* were produced from pGEM-T Easy plasmids  
8  
9 575 (Promega) by using the T7/SP6 RNA transcription system (Roche) following the  
10  
11 576 manufacturer's protocol. The PCR parameters were a preincubation 94 °C for 5 min,  
12  
13 577 followed by 30 cycles of 94 °C for 10 sec, 58 °C for 30 sec, 72 °C for 30 sec, and a  
14  
15 578 final extension at 72 °C for 10min. The brains and integuments were fixed in 4%  
16  
17 579 paraformaldehyde overnight. The paraffin-embedded slides (5 µm thick) were  
18  
19 580 deparaffinized in xylene, rehydrated with an ethanol gradient, digested with 20 µg/mL  
20  
21 581 proteinase K (Roche) at 37 °C for 15 min, and then incubated with *SmydA-2* probe at  
22  
23 582 60 °C for 5 min. The slides were hybridized for 7–15 h at 37 °C and washed in  
24  
25 583 0.2×SSC and 2% BSA at 4 °C for 5 min. The biotin-labeled probes of *SmydA-2* were  
26  
27 584 detected with a streptavidin horseradish peroxidase conjugate and fluorescein  
28  
29 585 tyramide substrate using a TSA kit (Perkin Elmer). Images for fluorescence signals  
30  
31 586 were acquired using an LSM 710 confocal fluorescence microscope (Zeiss).

32  
33  
34  
35  
36  
37  
38  
39 587 The recombinant proteins for *SmydA-2* and the negative controls of translation  
40  
41 588 system were produced using the TNT protein expression system (Promega) following  
42  
43 589 the manufacturer's protocol. In brief, 3 µg PCR-generated DNA templates  
44  
45 590 (Supplementary Table S4) were added to 30 µl TNT master mix, and the translation  
46  
47 591 reactions were incubated at 25 °C for 2 h. The recombinant proteins were verified by  
48  
49 592 Western blotting using His-tag antibodies. For *in vitro* methyltransferase assay, 2 mg  
50  
51 593 of unmodified histone H3 peptides (Sino Biological) were incubated with 1 mg of  
52  
53 594 recombinant protein and 0.1 mM S-adenosyl-methionine (SAM, NEB) in a reaction

1  
2  
3  
4  
5  
6  
7  
8  
9  
10  
11  
12  
13  
14  
15  
16  
17  
18  
19  
20  
21  
22  
23  
24  
25  
26  
27  
28  
29  
30  
31  
32  
33  
34  
35  
36  
37  
38  
39  
40  
41  
42  
43  
44  
45  
46  
47  
48  
49  
50  
51  
52  
53  
54  
55  
56  
57  
58  
59  
60  
61  
62  
63  
64  
65

595 buffer containing 50 mM Tris-HCl (pH 8.0), 10% glycerol, 20 mM KCl, 5 mM MgCl<sub>2</sub>,  
596 1 mM DTT, and 1 mM PMSF at 30 °C for 2 h. The reaction mixtures were subjected  
597 to electrophoresis on SDS-PAGE, and the methylation activities were detected in  
598 Western blotting using anti-pan methyl lysine antibody (Abcam). Anti-histone H3  
599 (Abcam) was used as endogenous control for protein samples.

600 Locusts (the migratory locust, *Locusta migratoria*) were reared in large,  
601 well-ventilated cages (40 cm × 40 cm × 40 cm) at a density of 500–1000 insects per  
602 container. These colonies were reared under a 14:10 light/dark photo regime at 30 °C  
603 and were fed fresh wheat seedlings and bran. Double-stranded RNAs of *SmydA-2* and  
604 green fluorescent protein (GFP) were prepared using the T7 RiboMAX Express RNAi  
605 system (Promega) in accordance with the manufacturer's protocols. Second-instar  
606 locusts were injected with double-stranded RNAs in the second ventral segment of the  
607 abdomen. Total RNAs were isolated using TRIzol reagent (Thermo Fisher Scientific)  
608 and then reverse-transcribed into cDNA using M-MLV reverse transcriptase  
609 (Promega). The mRNA levels were quantified using the SYBR Green expression  
610 assays on a LightCycler 480 instrument (Roche). The parameters were a  
611 pre-incubation 95°C for 10 min, followed by 45 cycles of 95 °C for 10 sec, 58 °C for  
612 20 sec, and a single acquisition when 72 °C for 20 sec. The ribosomal protein 49 gene  
613 was used as reference control, and the quantification was based on the requirement of  
614 PCR cycle number to cross or exceed the fluorescence intensity level; the  $2^{-\Delta\Delta Ct}$   
615 method was used to analyze mRNA expression levels. Survival data were analyzed  
616 using the Kaplan–Meier method [54], and survival curves were compared using  
617 log-rank testing for the *dsSmydA-2* and *dsGFP* curves.

### 619 **Signature of selection detected through likelihood ratio tests**

1  
2 620 Protein sequences of *SET* genes were aligned with the MAFFT alignment software  
3  
4  
5 621 [46] and the back-translated into corresponding nucleotide sequences. Gene  
6  
7 622 conversion was detected using the recombination detection program GENECONV  
8  
9  
10 623 version 1.81a. To assess the contribution of natural selection during the diversification  
11  
12 624 of the *SET* gene family in insects, the ratios of nonsynonymous substitution per  
13  
14 625 nonsynonymous site ( $d_N$ ) to synonymous substitution per synonymous site ( $d_S$ ) across  
15  
16 626 the phylogenetic tree of the species were calculated using the software package  
17  
18  
19 627 PAML version 4.48a [55]. The basic model M0 (null model) assumes the ratio  $\omega =$   
20  
21 628  $d_N/d_S$  is invariable (one-ratio model) among all branches examined, whereas the  
22  
23 629 alternative model allows the  $\omega$  ratio to vary in different tree branches in the  
24  
25  
26 630 phylogenetic tree [56, 57]. Likelihood ratio tests were applied to compare the null and  
27  
28  
29 631 alternative models, which estimated  $\omega$  ratio separately for different branches,  
30  
31 632 assuming a priori and the background branches. A significantly higher likelihood of  
32  
33 633 the alternative model than the null model indicates a better fit to the data, indicating a  
34  
35  
36 634 variation of selective pressures in different tree branches [56, 57].  
37  
38  
39 635

### 42 636 **Declarations**

### 47 637 **List of abbreviations**

48  
49  
50 638 *SET* genes, *SET* domain-containing genes; E(z), Enhancer of zeste; LCA, last  
51  
52 639 common ancestor; GO, gene ontology; MYND, Myeloid translocation protein; qPCR,  
53  
54 640 quantitative real-time polymerase chain reaction; DEGs, differentially expressed  
55  
56  
57  
58  
59  
60  
61  
62  
63  
64  
65

1  
2  
3  
4  
5  
6  
7  
8  
9  
10  
11  
12  
13  
14  
15  
16  
17  
18  
19  
20  
21  
22  
23  
24  
25  
26  
27  
28  
29  
30  
31  
32  
33  
34  
35  
36  
37  
38  
39  
40  
41  
42  
43  
44  
45  
46  
47  
48  
49  
50  
51  
52  
53  
54  
55  
56  
57  
58  
59  
60  
61  
62  
63  
64  
65

641 genes; FDR, false discovery rate; SAM, S-adenosyl-methionine; GFP, green  
642 fluorescent protein; PP, posterior probability

### 643 **Ethics approval and consent to participate**

644 All animal procedures were licensed under the Institutional Animal Care and Use  
645 Committee of the Institute of Zoology, Chinese Academy of Sciences.

### 646 **Consent for publication**

647 Not applicable

### 648 **Competing interests**

649 The authors declare they have no competing interests.

### 650 **Funding**

651 This research was supported by the following grants: National Natural Science  
652 Foundation of China Grants (Nos. 31301915, 31472051, and 31672353) and Strategic  
653 Priority Research Program of the Chinese Academy of Sciences (No. XDB11010000).

### 654 **Authors' contributions**

655 F.J., X.W., and L.K conceived and designed the experiments. F.J. and Q. L analyzed  
656 and interpreted the data. F.J., Q. L., Y.W., J.Z., H.W., T.S., and M.Y. performed the  
657 experiments. F.J., Q.L., and L.K wrote the paper.

## 658 **Acknowledgements**

659 The computational resources were provided by the Research Network of  
 660 Computational Biology and the Supercomputing Center at Beijing Institutes of Life  
 661 Science, Chinese Academy of Sciences.

## 662 **Availability of supporting data and materials**

663 The dataset supporting the conclusions of this article is available in  
 664 <http://159.226.67.242:8080/>.

## 666 **References**

- 667 1. Elofsson A, Sonnhammer EL: **A comparison of sequence and structure**  
 668 **protein domain families as a basis for structural genomics.** *Bioinformatics*  
 669 1999, **15**(6):480-500.
- 670 2. Itoh M, Nacher JC, Kuma K, Goto S, Kanehisa M: **Evolutionary history and**  
 671 **functional implications of protein domains and their combinations in**  
 672 **eukaryotes.** *Genome Biol* 2007, **8**(6):R121.
- 673 3. Sakarya O, Conaco C, Egecioglu O, Solla SA, Oakley TH, Kosik KS:  
 674 **Evolutionary expansion and specialization of the PDZ domains.** *Mol Biol*  
 675 *Evol* 2010, **27**(5):1058-1069.
- 676 4. Moore AD, Bornberg-Bauer E: **The dynamics and evolutionary potential of**  
 677 **domain loss and emergence.** *Mol Biol Evol* 2012, **29**(2):787-796.
- 678 5. Simola DF, Graham RJ, Brady CM, Enzmann BL, Desplan C, Ray A, Zwiebel  
 679 LJ, Bonasio R, Reinberg D, Liebig J *et al*: **Epigenetic (re)programming of**  
 680 **caste-specific behavior in the ant *Camponotus floridanus*.** *Science* 2016,  
 681 **351**(6268):aac6633.
- 682 6. Spannhoff A, Kim YK, Raynal NJ, Gharibyan V, Su MB, Zhou YY, Li J,  
 683 Castellano S, Sbardella G, Issa JP *et al*: **Histone deacetylase inhibitor**  
 684 **activity in royal jelly might facilitate caste switching in bees.** *EMBO Rep*  
 685 2011, **12**(3):238-243.
- 686 7. Simola DF, Ye C, Mutti NS, Dolezal K, Bonasio R, Liebig J, Reinberg D,  
 687 Berger SL: **A chromatin link to caste identity in the carpenter ant**  
 688 ***Camponotus floridanus*.** *Genome Res* 2013, **23**(3):486-496.
- 689 8. Dickman MJ, Kucharski R, Maleszka R, Hurd PJ: **Extensive histone**  
 690 **post-translational modification in honey bees.** *Insect Biochem Mol Biol*  
 691 2013, **43**(2):125-137.
- 692 9. Jenuwein T, Laible G, Dorn R, Reuter G: **SET domain proteins modulate**  
 693 **chromatin domains in eu- and heterochromatin.** *Cell Mol Life Sci* 1998,  
 694 **54**(1):80-93.

Evolution of *SET* Genes in Insects

- 695 10. Dillon SC, Zhang X, Trievel RC, Cheng X: **The SET-domain protein**  
696 **superfamily: protein lysine methyltransferases.** *Genome Biol* 2005,  
697 **6(8):227.**
- 698 11. Boros IM: **Histone modification in Drosophila.** *Brief Funct Genomics* 2012,  
699 **11(4):319-331.**
- 700 12. Herz HM, Garruss A, Shilatifard A: **SET for life: biochemical activities and**  
701 **biological functions of SET domain-containing proteins.** *Trends Biochem*  
702 *Sci* 2013, **38(12):621-639.**
- 703 13. Jenuwein T: **The epigenetic magic of histone lysine methylation.** *FEBS J*  
704 2006, **273(14):3121-3135.**
- 705 14. Misof B, Liu S, Meusemann K, Peters RS, Donath A, Mayer C, Frandsen PB,  
706 Ware J, Flouri T, Beutel RG *et al*: **Phylogenomics resolves the timing and**  
707 **pattern of insect evolution.** *Science* 2014, **346(6210):763-767.**
- 708 15. Ferguson LC, Green J, Surridge A, Jiggins CD: **Evolution of the insect**  
709 **yellow gene family.** *Mol Biol Evol* 2011, **28(1):257-272.**
- 710 16. Helmkampf M, Cash E, Gadau J: **Evolution of the insect desaturase gene**  
711 **family with an emphasis on social Hymenoptera.** *Mol Biol Evol* 2015,  
712 **32(2):456-471.**
- 713 17. Tanaka K, Diekmann Y, Hazbun A, Hijazi A, Vreede B, Roch F, Sucena E:  
714 **Multispecies Analysis of Expression Pattern Diversification in the**  
715 **Recently Expanded Insect Ly6 Gene Family.** *Mol Biol Evol* 2015,  
716 **32(7):1730-1747.**
- 717 18. Urena E, Pirone L, Chafino S, Perez C, Sutherland JD, Lang V, Rodriguez  
718 MS, Lopitz-Otsoa F, Blanco FJ, Barrio R *et al*: **Evolution of SUMO**  
719 **Function and Chain Formation in Insects.** *Mol Biol Evol* 2016,  
720 **33(2):568-584.**
- 721 19. Benton R: **Multigene Family Evolution: Perspectives from Insect**  
722 **Chemoreceptors.** *Trends Ecol Evol* 2015, **30(10):590-600.**
- 723 20. Zhang L, Ma H: **Complex evolutionary history and diverse domain**  
724 **organization of SET proteins suggest divergent regulatory interactions.**  
725 *The New phytologist* 2012, **195(1):248-263.**
- 726 21. Vidal NM, Grazziotin AL, Iyer LM, Aravind L, Venancio TM: **Transcription**  
727 **factors, chromatin proteins and the diversification of Hemiptera.** *Insect*  
728 *Biochem Mol Biol* 2016, **69:1-13.**
- 729 22. Rider SD, Jr., Srinivasan DG, Hilgarth RS: **Chromatin-remodelling proteins**  
730 **of the pea aphid, Acyrthosiphon pisum (Harris).** *Insect Mol Biol* 2010, **19**  
731 **Suppl 2:201-214.**
- 732 23. Bonasio R, Zhang G, Ye C, Mutti NS, Fang X, Qin N, Donahue G, Yang P, Li  
733 Q, Li C *et al*: **Genomic comparison of the ants Camponotus floridanus and**  
734 **Harpegnathos saltator.** *Science* 2010, **329(5995):1068-1071.**
- 735 24. Calpena E, Palau F, Espinos C, Galindo MI: **Evolutionary History of the**  
736 **Smyd Gene Family in Metazoans: A Framework to Identify the Orthologs**  
737 **of Human Smyd Genes in Drosophila and Other Animal Species.** *PLoS*  
738 *One* 2015, **10(7):e0134106.**
- 739 25. Wang X, Fang X, Yang P, Jiang X, Jiang F, Zhao D, Li B, Cui F, Wei J, Ma C  
740 *et al*: **The locust genome provides insight into swarm formation and**  
741 **long-distance flight.** *Nat Commun* 2014, **5:2957.**

Evolution of SET Genes in Insects



- 742 26. Thompson EC, Travers AA: **A *Drosophila* Smyd4 homologue is a**  
 743 **muscle-specific transcriptional modulator involved in development.** *PLoS*  
 744 *One* 2008, **3**(8):e3008.
- 745 27. Kaessmann H: **Origins, evolution, and phenotypic impact of new genes.**  
 746 *Genome Res* 2010, **20**(10):1313-1326.
- 747 28. Assis R, Bachtrog D: **Neofunctionalization of young duplicate genes in**  
 748 ***Drosophila*.** *Proc Natl Acad Sci U S A* 2013, **110**(43):17409-17414.
- 749 29. Krylov DM, Wolf YI, Rogozin IB, Koonin EV: **Gene loss, protein sequence**  
 750 **divergence, gene dispensability, expression level, and interactivity are**  
 751 **correlated in eukaryotic evolution.** *Genome research* 2003,  
 752 **13**(10):2229-2235.
- 753 30. Kemkemer C, Long M: **New genes important for development.** *EMBO Rep*  
 754 2014, **15**(5):460-461.
- 755 31. Kenny NJ, Chan KW, Nong W, Qu Z, Maeso I, Yip HY, Chan TF, Kwan HS,  
 756 Holland PW, Chu KH *et al*: **Ancestral whole-genome duplication in the**  
 757 **marine chelicerate horseshoe crabs.** *Heredity (Edinb)* 2016, **116**(2):190-199.
- 758 32. Kaessmann H, Vinckenbosch N, Long M: **RNA-based gene duplication:**  
 759 **mechanistic and evolutionary insights.** *Nat Rev Genet* 2009, **10**(1):19-31.
- 760 33. Hedges SB, Dudley J, Kumar S: **TimeTree: a public knowledge-base of**  
 761 **divergence times among organisms.** *Bioinformatics* 2006,  
 762 **22**(23):2971-2972.
- 763 34. Tan X, Rotllant J, Li H, De Deyne P, Du SJ: **SmyD1, a histone**  
 764 **methyltransferase, is required for myofibril organization and muscle**  
 765 **contraction in zebrafish embryos.** *Proc Natl Acad Sci U S A* 2006,  
 766 **103**(8):2713-2718.
- 767 35. Domazet-Loso T, Tautz D: **An evolutionary analysis of orphan genes in**  
 768 ***Drosophila*.** *Genome Res* 2003, **13**(10):2213-2219.
- 769 36. Innan H, Kondrashov F: **The evolution of gene duplications: classifying and**  
 770 **distinguishing between models.** *Nat Rev Genet* 2010, **11**(2):97-108.
- 771 37. Pegueroles C, Laurie S, Alba MM: **Accelerated evolution after gene**  
 772 **duplication: a time-dependent process affecting just one copy.** *Mol Biol*  
 773 *Evol* 2013, **30**(8):1830-1842.
- 774 38. Bonasio R: **The role of chromatin and epigenetics in the polyphenisms of**  
 775 **ant castes.** *Brief Funct Genomics* 2014, **13**(3):235-245.
- 776 39. Leinhart K, Brown M: **SET/MYND Lysine Methyltransferases Regulate**  
 777 **Gene Transcription and Protein Activity.** *Genes (Basel)* 2011,  
 778 **2**(1):210-218.
- 779 40. Sims RJ, 3rd, Nishioka K, Reinberg D: **Histone lysine methylation: a**  
 780 **signature for chromatin function.** *Trends Genet* 2003, **19**(11):629-639.
- 781 41. Finn RD, Mistry J, Tate J, Coghill P, Heger A, Pollington JE, Gavin OL,  
 782 Gunasekaran P, Ceric G, Forslund K *et al*: **The Pfam protein families**  
 783 **database.** *Nucleic Acids Res* 2010, **38**(Database issue):D211-222.
- 784 42. Finn RD, Clements J, Eddy SR: **HMMER web server: interactive sequence**  
 785 **similarity searching.** *Nucleic Acids Res* 2011, **39**(Web Server issue):W29-37.
- 786 43. Birney E, Clamp M, Durbin R: **GeneWise and Genomewise.** *Genome Res*  
 787 2004, **14**(5):988-995.
- 788 44. Coin L, Durbin R: **Improved techniques for the identification of**  
 789 **pseudogenes.** *Bioinformatics* 2004, **20 Suppl 1**:i94-100.

Evolution of *SET* Genes in Insects

- 790 45. Jones P, Binns D, Chang HY, Fraser M, Li W, McAnulla C, McWilliam H,  
791 Maslen J, Mitchell A, Nuka G *et al*: **InterProScan 5: genome-scale protein**  
792 **function classification**. *Bioinformatics* 2014, **30**(9):1236-1240.
- 793 46. Katoh K, Asimenos G, Toh H: **Multiple alignment of DNA sequences with**  
794 **MAFFT**. *Methods Mol Biol* 2009, **537**:39-64.
- 795 47. Darriba D, Taboada GL, Doallo R, Posada D: **ProtTest 3: fast selection of**  
796 **best-fit models of protein evolution**. *Bioinformatics* 2011, **27**(8):1164-1165.
- 797 48. Ronquist F, Teslenko M, van der Mark P, Ayres DL, Darling A, Höhna S,  
798 Larget B, Liu L, Suchard MA, Huelsenbeck JP: **MrBayes 3.2: efficient**  
799 **Bayesian phylogenetic inference and model choice across a large model**  
800 **space**. *Syst Biol* 2012, **61**(3):539-542.
- 801 49. Simao FA, Waterhouse RM, Ioannidis P, Kriventseva EV, Zdobnov EM:  
802 **BUSCO: assessing genome assembly and annotation completeness with**  
803 **single-copy orthologs**. *Bioinformatics* 2015, **31**(19):3210-3212.
- 804 50. Bolger AM, Lohse M, Usadel B: **Trimmomatic: a flexible trimmer for**  
805 **Illumina sequence data**. *Bioinformatics* 2014, **30**(15):2114-2120.
- 806 51. Trapnell C, Pachter L, Salzberg SL: **TopHat: discovering splice junctions**  
807 **with RNA-Seq**. *Bioinformatics* 2009, **25**(9):1105-1111.
- 808 52. Robinson MD, Oshlack A: **A scaling normalization method for differential**  
809 **expression analysis of RNA-seq data**. *Genome Biol* 2010, **11**(3):R25.
- 810 53. Robinson MD, McCarthy DJ, Smyth GK: **edgeR: a Bioconductor package**  
811 **for differential expression analysis of digital gene expression data**.  
812 *Bioinformatics* 2010, **26**(1):139-140.
- 813 54. Kaplan EL, Meier P: **Nonparametric-Estimation from Incomplete**  
814 **Observations**. *J Am Stat Assoc* 1958, **53**(282):457-481.
- 815 55. Yang Z: **PAML 4: phylogenetic analysis by maximum likelihood**. *Mol Biol*  
816 *Evol* 2007, **24**(8):1586-1591.
- 817 56. Yang Z: **Likelihood ratio tests for detecting positive selection and**  
818 **application to primate lysozyme evolution**. *Mol Biol Evol* 1998,  
819 **15**(5):568-573.
- 820 57. Yang Z, Nielsen R: **Synonymous and nonsynonymous rate variation in**  
821 **nuclear genes of mammals**. *J Mol Evol* 1998, **46**(4):409-418.
- 822

823

## 824 Figures

825 **Figure 1. Phylogenetic analysis of SET genes in insects.** A phylogeny using  
826 Bayesian inference is generated from the domain protein sequence of SET genes. One  
827 representative is elected for each order. The protein domains, which are labeled with  
828 different colors based on the domain type, are shown in the exterior circle of the  
829 phylogenetic tree. The length of the grey long line after each terminal is directly  
Evolution of SET Genes in Insects

1  
2  
3  
4  
5  
6  
7  
8  
9  
10  
11  
12  
13  
14  
15  
16  
17  
18  
19  
20  
21  
22  
23  
24  
25  
26  
27  
28  
29  
30  
31  
32  
33  
34  
35  
36  
37  
38  
39  
40  
41  
42  
43  
44  
45  
46  
47  
48  
49  
50  
51  
52  
53  
54  
55  
56  
57  
58  
59  
60  
61  
62  
63  
64  
65

830 proportional to the length of the corresponding *SET* gene. The branch colors of the  
 831 phylogenetic trees indicate the established *SET* gene classification which divides *SET*  
 832 genes into seven major conserved groups, namely: Suv, Ash, Trx, E(z), PRDM,  
 833 SMYD, and SETD. The *SET* genes labeled in black branches cannot be classified into  
 834 the seven major conserved groups, suggesting their arthropod origin. The  
 835 representative species include *Apis mellifera*, *Daphnia pule*, *Drosophila*  
 836 *melanogaster*, *Ixodes scapularis*, *Locusta migratoria*, *Pediculus humanus*, *Plutella*  
 837 *xylostella*, *Rhodnius prolixus*, *Tetranychus urticae*, *Timema cristinae* and *Tribolium*  
 838 *castaneum*.

839  
 840 **Figure 2. Diversification of arthropod-specific *SET* genes.** (A) Distribution pattern  
 841 of *SET* genes in arthropod orders. One representative is elected for each order. Red  
 842 color indicates presence of *SET* genes, and blue color indicates absence of *SET* genes.  
 843 (B) Inference of ancestral sets of *SET* homologous groups along the evolution of  
 844 insects. The gains and losses of *SET* homologous groups are indicated in the internal  
 845 nodes of the phylogenetic tree. The number in parentheses indicates the number of  
 846 species in each order. The bars indicate the number ranges of *SET* homologous groups  
 847 in each order.

848  
 849 **Figure 3. Evolution of *SmydA* genes in insects.** (A) Gene ontology categories of the  
 850 conserved and arthropod-specific groups of *SET* genes. The gene ontology categories,  
 851 which are only present in the arthropod-specific group, are highlighted in red. (B)  
 852 Phylogenetic tree of the SMYD gene family of the representative species selected  
 853 from each order. The representative species include *Apis mellifera*, *Daphnia pule*,

Evolution of *SET* Genes in Insects

854 *Drosophila melanogaster*, *Ixodes scapularis*, *Locusta migratoria*, *Pediculus humanus*,  
 855 *Plutella xylostella*, *Rhodnius prolixus*, *Tetranychus urticae*, *Timema cristinae* and  
 856 *Tribolium castaneum*. The phylogenetic tree is constructed using the Bayesian  
 857 inference method. The Bayesian posterior probability (PP) values are indicated only  
 858 for the internal nodes to improve clarity; consequently, the *SET* genes are grouped  
 859 into different monophyletic clades (SMYD subfamilies). Red and orange circles  
 860 indicate PP > 90% and PP > 70%, respectively. (C) Conserved synteny for *SmydA*  
 861 genes in four holometabolous species. Shown from top to bottom are *Drosophila*  
 862 *melanogaster*, *Anopheles gambiae*, *Tribolium castaneum* and *Apis mellifera*. (D)  
 863 Distributions of  $\omega$  ( $\omega = d_N/d_S$  ratio) values of the conserved SMYD and *SmydA* groups  
 864 of *SET* genes.

866 **Figure 4. Function approval of *SmydA-2* genes through experimental evidence.**

867 (A) *In vitro* methyltransferase assay of histone H3 of *SmydA-2* in locusts. Anti-pan  
 868 methyl lysine antibody recognizes histone H3 *in vitro* methylated with *SmydA-2*.  
 869 Anti-histone H3 serves as endogenous control for protein samples. The analyses were  
 870 carried out in three replicates. **\*\* $P < 0.01$** . (B) Expression evidence of *SmydA-2* in the  
 871 brain and cuticle of locusts via fluorescence *in situ* hybridization analysis. Green  
 872 signals indicate the expression of *SmydA-2* /control, and blue signals indicate nuclear  
 873 staining with Hoechst. (C) Relative gene expression of *SmydA-2* in the different  
 874 tissues. mRNA levels are quantified using the SYBR Green expression assays on a  
 875 LightCycler 480 instrument. The qPCR data are shown as the mean  $\pm$  SEM ( $n = 6$ ).  
 876 (D) Survival analysis of the locusts after *SmydA-2* double-strand RNA injection. Data

1  
2  
3  
4  
5  
6  
7  
8  
9  
10  
11  
12  
13  
14  
15  
16  
17  
18  
19  
20  
21  
22  
23  
24  
25  
26  
27  
28  
29  
30  
31  
32  
33  
34  
35  
36  
37  
38  
39  
40  
41  
42  
43  
44  
45  
46  
47  
48  
49  
50  
51  
52  
53  
54  
55  
56  
57  
58  
59  
60  
61  
62  
63  
64  
65

877 are analyzed through the Kaplan–Meier survival curve comparison of the *dsSmydA-2*  
878 and *dsGFP* groups for three replicates.

879

880 **Figure 5. Differential expression analysis in insects showing phenotype plasticity.**

881 Alternative phenotype includes gregarious and solitary phases in *Locusta migratoria*

882 (LOCMI), asexual and sexual morphs in *Acyrtosiphon pisum* (ACYPI), queens and

883 workers in *Apis mellifera* (APIME), and large workers and queens in *Acromyrmex*

884 *echinator* (ACREC).

885

## 886 **Tables**

887 **Table 1. Summary of *SET* genes in insect genomes.**

888 **Table 2. Tests of rate heterogeneity acting on *SET* genes in insects.**

889 **Table 3. Signatures of selection acting on differentially expressed *SET* genes in  
890 response to phenotypic plasticity.**

891

## 892 **Supplementary Data**

893 **Supplementary Table S1. The arthropod genome data involved in this study.**

894 **Supplementary Table S2. *SET* genes in the 147 arthropod genomes.**

895 **Supplementary Table S3. Summary of *SET* genes in the 147 arthropod genomes.**

896 **Supplementary Table S4. Primers used in the study.**

897 **Supplementary Figure S1. Phylogenetic analysis of the *SET* genes in Lepidoptera  
898 using Maximum-likelihood inferences with PhyML. The *SET* gene families labeled**

Evolution of *SET* Genes in Insects

1  
2  
3  
4  
5  
6  
7  
8  
9  
10  
11  
12  
13  
14  
15  
16  
17  
18  
19  
20  
21  
22  
23  
24  
25  
26  
27  
28  
29  
30  
31  
32  
33  
34  
35  
36  
37  
38  
39  
40  
41  
42  
43  
44  
45  
46  
47  
48  
49  
50  
51  
52  
53  
54  
55  
56  
57  
58  
59  
60  
61  
62  
63  
64  
65

899 with different colors are shown in the exterior circle of the phylogenetic tree. The  
900 insect species involved are represented with different colors of the external branch.

901 **Supplementary Figure S2. Phylogenetic analysis of the *SET* genes in Diptera**

902 **using Maximum-likelihood inferences with PhyML.** The *SET* gene families labeled  
903 with different colors are shown in the exterior circle of the phylogenetic tree. The  
904 insect species involved are represented with different colors of the external branch.  
905 The representative species are selected to improve clarity.

906 **Supplementary Figure S3. Phylogenetic analysis of the *SET* genes in Hemiptera**

907 **using Maximum-likelihood inferences with PhyML.** The *SET* gene families labeled  
908 with different colors are shown in the exterior circle of the phylogenetic tree. The  
909 insect species involved are represented with different colors of the external branch.

910 **Supplementary Figure S4. Phylogenetic analysis of the *SET* genes in**

911 **Hymenoptera using Maximum-likelihood inferences with PhyML.** The *SET* gene  
912 families labeled with different colors are shown in the exterior circle of the  
913 phylogenetic tree. The insect species involved are represented with different colors of  
914 the external branch. The representative species are selected to improve clarity.

915 **Supplementary Figure S5. Phylogenetic analysis of the *SET* genes in Coleopteran**

916 **using Maximum-likelihood inferences with PhyML.** The *SET* gene families labeled  
917 with different colors are shown in the exterior circle of the phylogenetic tree. The  
918 insect species involved are represented with different colors of the external branch.

919 **Supplementary Figure S6. Effects of RNA interference of the mRNA expression**

920 **levels of *SmydA-2* in locust brains.** The locusts are injected with double-stranded  
921 RNAs into the second ventral segment of the abdomen. Due to the systemic RNA  
922 interference in locusts, the brain, which is spatially distant from the abdomen, is used

1  
2  
3  
4  
5  
6  
7  
8  
9  
10  
11  
12  
13  
14  
15  
16  
17  
18  
19  
20  
21  
22  
23  
24  
25  
26  
27  
28  
29  
30  
31  
32  
33  
34  
35  
36  
37  
38  
39  
40  
41  
42  
43  
44  
45  
46  
47  
48  
49  
50  
51  
52  
53  
54  
55  
56  
57  
58  
59  
60  
61  
62  
63  
64  
65

923 in qPCR assays to guarantee effective expression knockdown. qPCR data are shown  
924 as the mean  $\pm$  SEM (n = 6). \*\*P < 0.01.

925 **Supplementary Figure S7. Tree topology and branch labeling for tests of**  
926 **selection on *SET* genes.** APIME, *Apis mellifera*; ACREC, *Acromyrmex echinator*;  
927 LOCMI, *Locusta migratoria*. Supplementary Table S1 presents the abbreviation of  
928 insect species.

929

Table 1. Summary of *SET* genes in insect genomes.

| Order         | Genus                    | SMYD  | SETD | PRDM | Ash | Suv | Trx | Ez  | Other | Total |
|---------------|--------------------------|-------|------|------|-----|-----|-----|-----|-------|-------|
| Coleoptera    | <i>Agrilus</i> (1)       | 4     | 1    | 2    | 3   | 3   | 3   | 1   | 9     | 26    |
| Coleoptera    | <i>Anoplophora</i> (1)   | 7     | 1    | 2    | 3   | 3   | 3   | 2   | 7     | 28    |
| Coleoptera    | <i>Dendroctonus</i> (1)  | 5     | 1    | 1    | 3   | 3   | 3   | 1   | 12    | 29    |
| Coleoptera    | <i>Leptinotarsa</i> (1)  | 10    | 1    | 1    | 2   | 5   | 3   | 1   | 9     | 32    |
| Coleoptera    | <i>Onthophagus</i> (1)   | 4     | 1    | 1    | 3   | 4   | 3   | 1   | 10    | 27    |
| Coleoptera    | <i>Oryctes</i> (1)       | 6     | 1    | 1    | 3   | 3   | 1   | 1   | 9     | 25    |
| Coleoptera    | <i>Tribolium</i> (1)     | 6     | 2    | 1    | 3   | 3   | 3   | 1   | 15    | 34    |
| Phthiraptera  | <i>Pediculus</i> (1)     | 6     | 1    | 1    | 3   | 4   | 3   | 1   | 9     | 28    |
| Blattodea     | <i>Blattella</i> (1)     | 4     | 2    | 2    | 4   | 3   | 2   | 1   | 7     | 25    |
| Diptera       | <i>Aedes</i> (2)         | 11-12 | 1    | 2    | 3-4 | 2-3 | 3-4 | 1-2 | 11-12 | 34-38 |
| Diptera       | <i>Anopheles</i> (19)    | 6-19  | 1    | 1-2  | 1-3 | 2-3 | 2-3 | 1   | 4-11  | 20-37 |
| Diptera       | <i>Bactrocera</i> (2)    | 4-5   | 1    | 1-2  | 3-4 | 4   | 3-6 | 1-2 | 13-22 | 31-45 |
| Diptera       | <i>Ceratina</i> (1)      | 5     | 1    | 1    | 2   | 4   | 3   | 1   | 11    | 28    |
| Diptera       | <i>Ceratitis</i> (1)     | 5     | 1    | 1    | 3   | 3   | 3   | 1   | 14    | 31    |
| Diptera       | <i>Culex</i> (1)         | 40    | 1    | 1    | 13  | 2   | 9   | 1   | 14    | 81    |
| Diptera       | <i>Drosophila</i> (22)   | 4-5   | 1    | 1    | 3-4 | 3-5 | 2-4 | 1   | 7-14  | 24-31 |
| Diptera       | <i>Glossina</i> (6)      | 4-5   | 1    | 1    | 3-4 | 2-5 | 3-4 | 1   | 12-15 | 29-34 |
| Diptera       | <i>Lucilia</i> (1)       | 5     | 1    | 1    | 3   | 3   | 3   | 1   | 12    | 29    |
| Diptera       | <i>Lutzomyia</i> (1)     | 6     | 1    | 1    | 3   | 3   | 2   | 1   | 10    | 27    |
| Diptera       | <i>Mayetiola</i> (1)     | 13    | 1    | 1    | 9   | 6   | 4   | 1   | 25    | 60    |
| Diptera       | <i>Megaselia</i> (1)     | 2     | 1    | 1    | 3   | 2   | 1   | 1   | 5     | 16    |
| Diptera       | <i>Musca</i> (1)         | 5     | 1    | 1    | 3   | 3   | 3   | 1   | 20    | 37    |
| Diptera       | <i>Phlebotomus</i> (1)   | 5     | 1    | 1    | 4   | 3   | 3   | 1   | 6     | 24    |
| Diptera       | <i>Belgica</i> (1)       | 27    | 2    | 1    | 3   | 5   | 4   | 1   | 12    | 55    |
| Diptera       | <i>Stomoxys</i> (1)      | 5     | 1    | 1    | 3   | 2   | 3   | 1   | 16    | 32    |
| Ephemeroptera | <i>Ephemera</i> (1)      | 18    | 1    | 1    | 3   | 2   | 2   | 1   | 12    | 40    |
| Hemiptera     | <i>Acyrtosiphon</i> (1)  | 14    | 1    | 0    | 2   | 10  | 4   | 1   | 31    | 63    |
| Hemiptera     | <i>Cimex</i> (1)         | 4     | 1    | 2    | 3   | 5   | 3   | 1   | 5     | 24    |
| Hemiptera     | <i>Diaphorina</i> (1)    | 3     | 1    | 1    | 4   | 4   | 3   | 2   | 11    | 29    |
| Hemiptera     | <i>Gerris</i> (1)        | 6     | 1    | 1    | 3   | 3   | 3   | 1   | 8     | 26    |
| Hemiptera     | <i>Halyomorpha</i> (1)   | 5     | 1    | 1    | 2   | 5   | 3   | 1   | 8     | 26    |
| Hemiptera     | <i>Homalodisca</i> (1)   | 5     | 2    | 2    | 2   | 5   | 4   | 1   | 8     | 29    |
| Hemiptera     | <i>Nilaparvata</i> (1)   | 4     | 1    | 6    | 2   | 4   | 4   | 1   | 7     | 29    |
| Hemiptera     | <i>Oncopeltus</i> (1)    | 6     | 1    | 1    | 2   | 5   | 4   | 1   | 7     | 27    |
| Hemiptera     | <i>Pachypsylla</i> (1)   | 1     | 1    | 2    | 2   | 3   | 1   | 1   | 9     | 20    |
| Hemiptera     | <i>Rhodnius</i> (1)      | 6     | 1    | 1    | 2   | 2   | 2   | 1   | 6     | 21    |
| Hymenoptera   | <i>Acromyrmex</i> (1)    | 7     | 2    | 1    | 3   | 3   | 3   | 1   | 7     | 27    |
| Hymenoptera   | <i>Apis</i> (3)          | 6-7   | 1    | 1    | 3   | 3-4 | 1-3 | 1   | 7-9   | 22-29 |
| Hymenoptera   | <i>Athalia</i> (1)       | 7     | 1    | 2    | 2   | 3   | 2   | 1   | 8     | 26    |
| Hymenoptera   | <i>Atta</i> (1)          | 8     | 1    | 1    | 3   | 4   | 3   | 1   | 7     | 28    |
| Hymenoptera   | <i>Bombus</i> (2)        | 7-8   | 1    | 1    | 3   | 4   | 3   | 1   | 8-10  | 29-30 |
| Hymenoptera   | <i>Camponotus</i> (1)    | 8     | 2    | 1    | 2   | 3   | 2   | 1   | 8     | 27    |
| Hymenoptera   | <i>Cardiocondyla</i> (1) | 7     | 2    | 1    | 3   | 4   | 3   | 1   | 10    | 31    |
| Hymenoptera   | <i>Cephus</i> (1)        | 6     | 1    | 1    | 2   | 3   | 2   | 1   | 6     | 22    |
| Hymenoptera   | <i>Cerapachys</i> (1)    | 5     | 1    | 1    | 2   | 3   | 3   | 1   | 6     | 22    |
| Hymenoptera   | <i>Ceratosolen</i> (1)   | 8     | 1    | 1    | 3   | 3   | 2   | 1   | 9     | 28    |
| Hymenoptera   | <i>Copidosoma</i> (1)    | 17    | 1    | 1    | 3   | 4   | 2   | 1   | 16    | 45    |
| Hymenoptera   | <i>Dufourea</i> (1)      | 7     | 2    | 1    | 3   | 4   | 3   | 1   | 7     | 28    |



|               |                          |    |   |   |   |     |   |   |      |       |
|---------------|--------------------------|----|---|---|---|-----|---|---|------|-------|
| Hymenoptera   | <i>Eufriesea</i> (1)     | 6  | 2 | 1 | 3 | 4   | 3 | 1 | 8    | 28    |
| Hymenoptera   | <i>Fopius</i> (1)        | 9  | 1 | 1 | 3 | 4   | 1 | 1 | 9    | 29    |
| Hymenoptera   | <i>Habropoda</i> (1)     | 8  | 2 | 1 | 3 | 4   | 3 | 1 | 8    | 30    |
| Hymenoptera   | <i>Harpegnathos</i> (1)  | 8  | 2 | 0 | 1 | 2   | 1 | 1 | 8    | 23    |
| Hymenoptera   | <i>Linepithema</i> (1)   | 7  | 2 | 1 | 3 | 4   | 3 | 1 | 8    | 29    |
| Hymenoptera   | <i>Megachile</i> (1)     | 7  | 2 | 1 | 3 | 3   | 3 | 1 | 8    | 28    |
| Hymenoptera   | <i>Melipona</i> (1)      | 7  | 2 | 1 | 3 | 4   | 3 | 1 | 8    | 29    |
| Hymenoptera   | <i>Microplitis</i> (1)   | 18 | 1 | 1 | 3 | 4   | 3 | 2 | 8    | 40    |
| Hymenoptera   | <i>Monomorium</i> (1)    | 6  | 1 | 1 | 2 | 3   | 2 | 1 | 5    | 21    |
| Hymenoptera   | <i>Nasonia</i> (1)       | 17 | 1 | 1 | 3 | 4   | 2 | 1 | 23   | 52    |
| Hymenoptera   | <i>Orussus</i> (1)       | 11 | 2 | 1 | 2 | 3   | 3 | 1 | 7    | 30    |
| Hymenoptera   | <i>Pogonomyrmex</i> (1)  | 5  | 2 | 1 | 2 | 4   | 3 | 1 | 8    | 26    |
| Hymenoptera   | <i>Polistes</i> (1)      | 6  | 1 | 1 | 1 | 4   | 2 | 1 | 6    | 22    |
| Hymenoptera   | <i>Solenopsis</i> (1)    | 2  | 1 | 1 | 3 | 3   | 3 | 1 | 7    | 21    |
| Hymenoptera   | <i>Trichogramma</i> (1)  | 15 | 1 | 1 | 3 | 4   | 1 | 1 | 26   | 52    |
| Hymenoptera   | <i>Vollenhovia</i> (1)   | 6  | 1 | 1 | 3 | 4   | 2 | 1 | 3    | 21    |
| Hymenoptera   | <i>Lasioglossum</i> (1)  | 9  | 1 | 1 | 3 | 3   | 3 | 1 | 8    | 29    |
| Hymenoptera   | <i>Wasmannia</i> (1)     | 7  | 1 | 1 | 3 | 3   | 3 | 1 | 6    | 25    |
| Isoptera      | <i>Zootermopsis</i> (2)  | 6  | 1 | 2 | 2 | 4   | 3 | 1 | 10   | 29    |
| Lepidoptera   | <i>Bombyx</i> (1)        | 4  | 2 | 1 | 3 | 4   | 3 | 1 | 8    | 26    |
| Lepidoptera   | <i>Danaus</i> (1)        | 5  | 1 | 1 | 3 | 5   | 3 | 1 | 10   | 29    |
| Lepidoptera   | <i>Heliconius</i> (1)    | 5  | 1 | 1 | 2 | 4   | 3 | 1 | 6    | 23    |
| Lepidoptera   | <i>Papilio</i> (2)       | 6  | 1 | 1 | 3 | 2-4 | 2 | 1 | 9-11 | 26-27 |
| Lepidoptera   | <i>Lerema</i> (1)        | 4  | 1 | 2 | 3 | 3   | 3 | 1 | 10   | 27    |
| Lepidoptera   | <i>Melitaea</i> (1)      | 5  | 1 | 1 | 3 | 1   | 3 | 1 | 8    | 23    |
| Lepidoptera   | <i>Manduca</i> (1)       | 6  | 2 | 7 | 7 | 5   | 5 | 2 | 29   | 63    |
| Lepidoptera   | <i>Plutella</i> (1)      | 5  | 4 | 1 | 4 | 5   | 6 | 0 | 13   | 38    |
| Odonata       | <i>Ladona</i> (1)        | 3  | 2 | 2 | 3 | 4   | 3 | 1 | 9    | 27    |
| Orthoptera    | <i>Locusta</i> (1)       | 9  | 1 | 1 | 3 | 4   | 3 | 1 | 7    | 29    |
| Phasmatoptera | <i>Timema</i> (1)        | 3  | 1 | 1 | 3 | 5   | 3 | 1 | 6    | 23    |
| Thysanoptera  | <i>Frankliniella</i> (1) | 6  | 2 | 8 | 3 | 5   | 3 | 1 | 21   | 49    |
| Trichoptera   | <i>Limnephilus</i> (1)   | 3  | 1 | 0 | 2 | 3   | 2 | 1 | 6    | 18    |

used to represent the range of *SET* gene number in each genus. The exact gene numbers for different groups in a species are shown in the supplementary Table 3. Other, arthropod-specific and unclassified *SET* genes.

Table 2. Tests of rate heterogeneity acting on *SET* genes in insects.

|       | Gene               | One Ratio Likelihood | One Ratio $\omega$ | Free Ratio Likelihood | df | <i>P</i> |
|-------|--------------------|----------------------|--------------------|-----------------------|----|----------|
|       | <i>Smyd3</i>       | -4833.870633         | 0.055              | -4833.870633          | 16 | <0.001   |
| SMYD  | <i>Smyd4-1</i>     | -17270.85481         | 0.1627             | -17140.2931           | 58 | <0.001   |
|       | <i>Smyd4-2</i>     | -13187.36796         | 0.1125             | -13112.10598          | 44 | <0.001   |
|       | <i>Smyd4-3</i>     | -20488.96316         | 0.1069             | -20364.99139          | 66 | <0.001   |
|       | <i>Smyd4-4</i>     | -15552.36608         | 0.1112             | -15475.97917          | 44 | <0.001   |
|       | <i>Smyd5</i>       | -21495.43548         | 0.0633             | -21329.01303          | 64 | <0.001   |
|       | <i>upSET(MLL5)</i> | -7286.598116         | 0.0103             | -7247.800191          | 62 | 0.087    |
|       | <i>Set8</i>        | -6450.096636         | 0.0321             | -6386.997507          | 60 | <0.001   |
|       | <i>Hmt4-20</i>     | -3523.660744         | 0.0079             | -3478.339497          | 56 | <0.001   |
| SETD  | <i>SETD</i>        | -9030.115692         | 0.033              | -9009.972504          | 34 | 0.212    |
| PRDM  | <i>Blimp-1</i>     | -2679.981724         | 0.0051             | -2664.129882          | 52 | 0.988    |
|       | <i>Mes-4</i>       | -5530.425067         | 0.0163             | -5504.225668          | 56 | 0.612    |
| Ash   | <i>ash1</i>        | -4995.315864         | 0.0122             | -4947.987993          | 60 | <0.001   |
|       | <i>Set2</i>        | -5636.021533         | 0.0118             | -5570.266003          | 60 | <0.001   |
|       | <i>Su(var)3-9</i>  | -4351.473377         | 0.0212             | -4308.872564          | 32 | <0.001   |
| Suv   | <i>egg</i>         | -15308.27271         | 0.0624             | -15214.54477          | 54 | <0.001   |
|       | <i>CG4565</i>      | -7168.675146         | 0.056              | -7114.254055          | 46 | <0.001   |
|       | <i>G9a</i>         | -4641.585219         | 0.0091             | -4604.810574          | 54 | 0.040    |
|       | <i>trx</i>         | -3897.22035          | 0.0031             | -3877.624919          | 58 | 0.972    |
| Trx   | <i>Set1</i>        | -3733.003015         | 0.0026             | -3700.07484           | 60 | 0.281    |
|       | <i>trr</i>         | -4549.712            | 0.0114             | -4471.116449          | 60 | <0.001   |
| E(z)  | <i>Ez</i>          | -3368.302419         | 0.0007             | -3355.922925          | 61 | 1.000    |
|       | <i>SmydA-1</i>     | -10066.85883         | 0.0904             | -9995.276076          | 34 | <0.001   |
|       | <i>SmydA-2</i>     | -11858.79656         | 0.0052             | -11812.61641          | 30 | <0.001   |
|       | <i>SmydA-3</i>     | -13902.68842         | 0.0817             | -13842.81154          | 56 | <0.001   |
| SMYDA | <i>SmydA-4</i>     | -9602.742487         | 0.0254             | -9583.599425          | 26 | 0.057    |
|       | <i>SmydA-5</i>     | -13748.76916         | 0.1179             | -13656.26849          | 50 | <0.001   |
|       | <i>SmydA-6</i>     | -12142.19779         | 0.1623             | -12043.99319          | 42 | <0.001   |
|       | <i>SmydA-9</i>     | -13258.40628         | 0.1357             | -13193.53611          | 52 | <0.001   |

---

Note: Accounting for the unequal genome sequencing efforts between different insect families, we selected one species within each genus to be representative of the genus.

Table 3. Signatures of selection acting on differential expressed *SET* genes in response to phenotypic plasticity.

| Model-Parameters                  | APIME               |                | LOCMI          | ACREC          |                |                |
|-----------------------------------|---------------------|----------------|----------------|----------------|----------------|----------------|
|                                   | <i>SmydA-3</i>      | <i>SmydA-5</i> | <i>SmydA-1</i> | <i>SmydA-3</i> | <i>SmydA-5</i> | <i>SmydA-9</i> |
| <b>Basic models</b>               |                     |                |                |                |                |                |
| M0: $\omega$                      | 0.082               | 0.118          | 0.090          | 0.082          | 0.118          | 0.136          |
| <b>Branch models</b>              |                     |                |                |                |                |                |
| B0: lnL                           | -13914.741          | -13749.007     | -10088.904     | -13905.140     | -13749.047     | -13259.370     |
| B0: $\omega_0$ ( $\omega_1 = 1$ ) | 0.077               | 0.113          | 0.090          | 0.081          | 0.117          | 0.135          |
| BA: lnL                           | -13901.138          | -13745.405     | -10056.182     | -13901.922     | -13748.719     | -13258.338     |
| BA: $\omega_0, \omega_1$          | 0.080, 0.142        | 0.115, 0.313   | 0.095, 0.003   | 0.081, 0.177   | 0.118, 0.181   | 0.135, 0.186   |
| <b>Branch-site models</b>         |                     |                |                |                |                |                |
| A0: $p_{2a}$ ( $\omega_2 = 1$ )   | 0.078               | 0.059          | 0.111          | 0.082          | 0.155          | 0.096          |
| AA: $p_{2a}', \omega_2$           | 0.078, 1.000        | 0.025, 3.102   | 0.109, 8.895   | 0.082, 1.000   | 0.155, 1.000   | 0.011, 19.742  |
| Positively selected sites (BEB)   | 5 M 11 K 93 P 105 C |                |                |                |                |                |
| <b>LRT, P</b>                     |                     |                |                |                |                |                |
| M0 versus BA                      | 0.078               | 0.009          | <0.001         | 0.216          | 0.752          | 0.712          |
| BA versus B0                      | <0.001              | 0.007          | <0.001         | 0.011          | 0.418          | 0.151          |
| A0 versus AA                      | 1.000               | 0.802          | 0.022          | 1.000          | 1.000          | 0.082          |

$\omega$ , the ratios of nonsynonymous substitution per nonsynonymous site to synonymous substitution per synonymous site;  $\omega_0, \omega_1$ , background and foreground  $\omega$  values, respectively; APIME, *Apis mellifera*; ACREC, *Acromyrmex echinator*; LOCMI, *Locusta migratoria*.

Figure 1

[Click here to download Figure figure1\\_20161006.pdf](#)

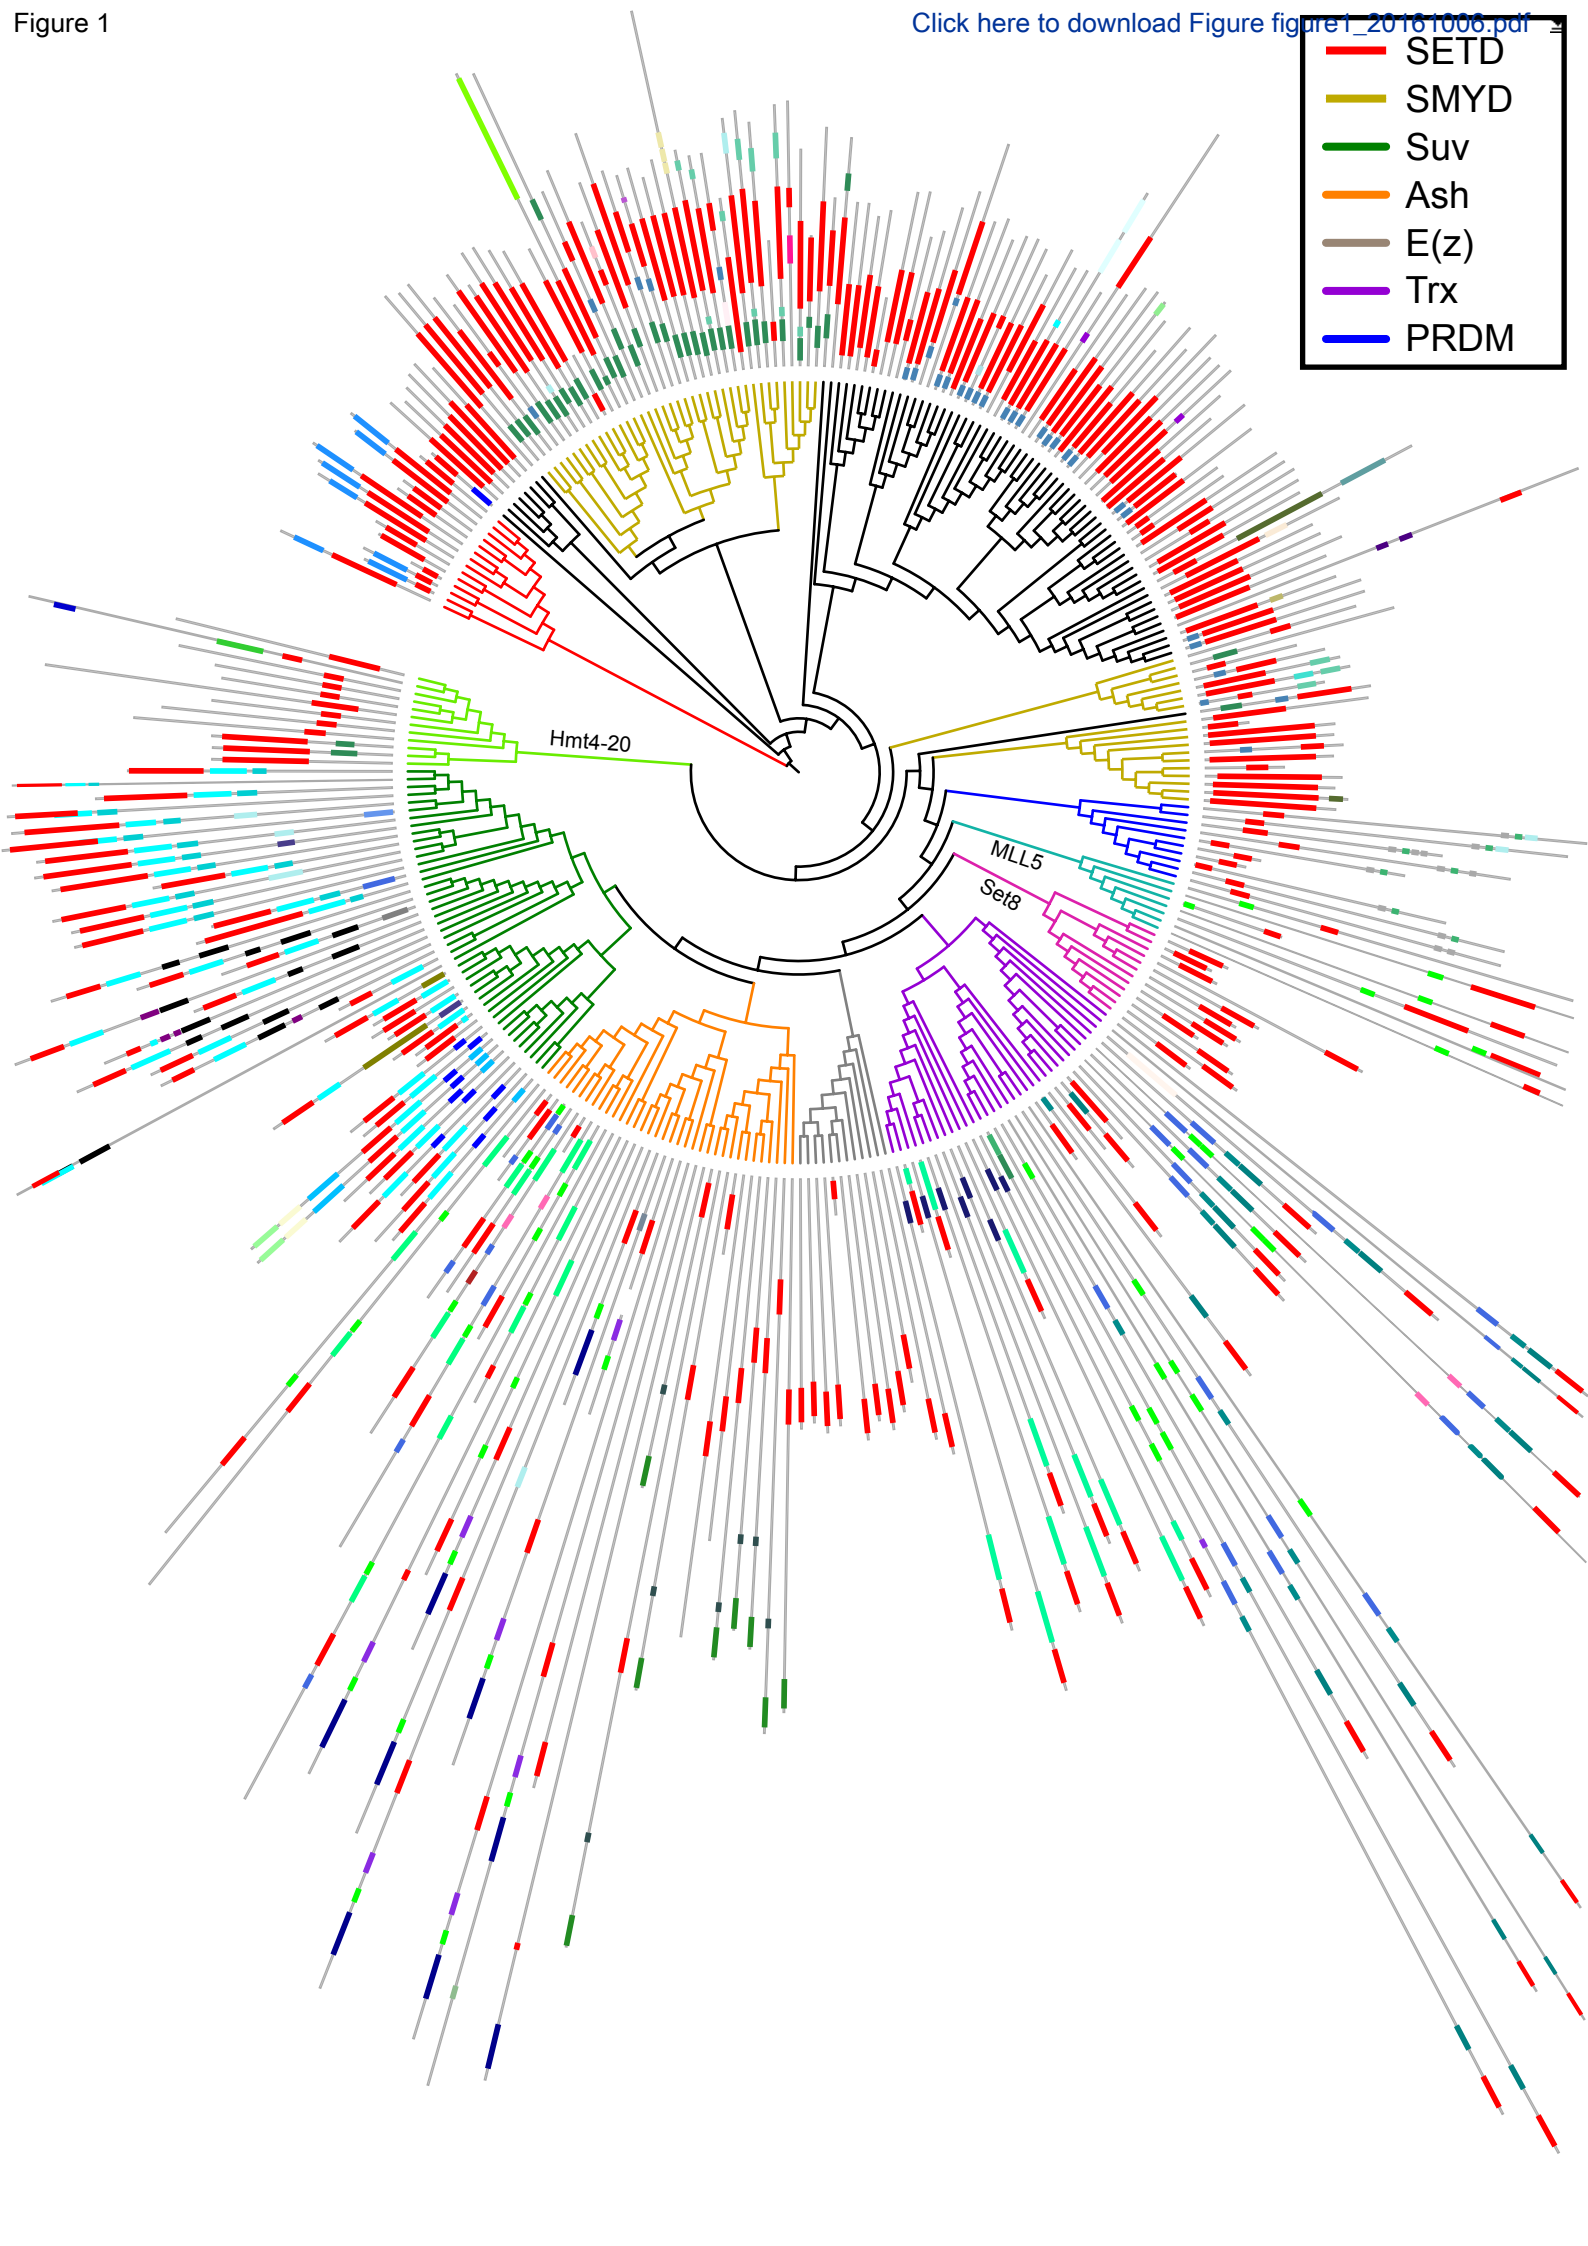

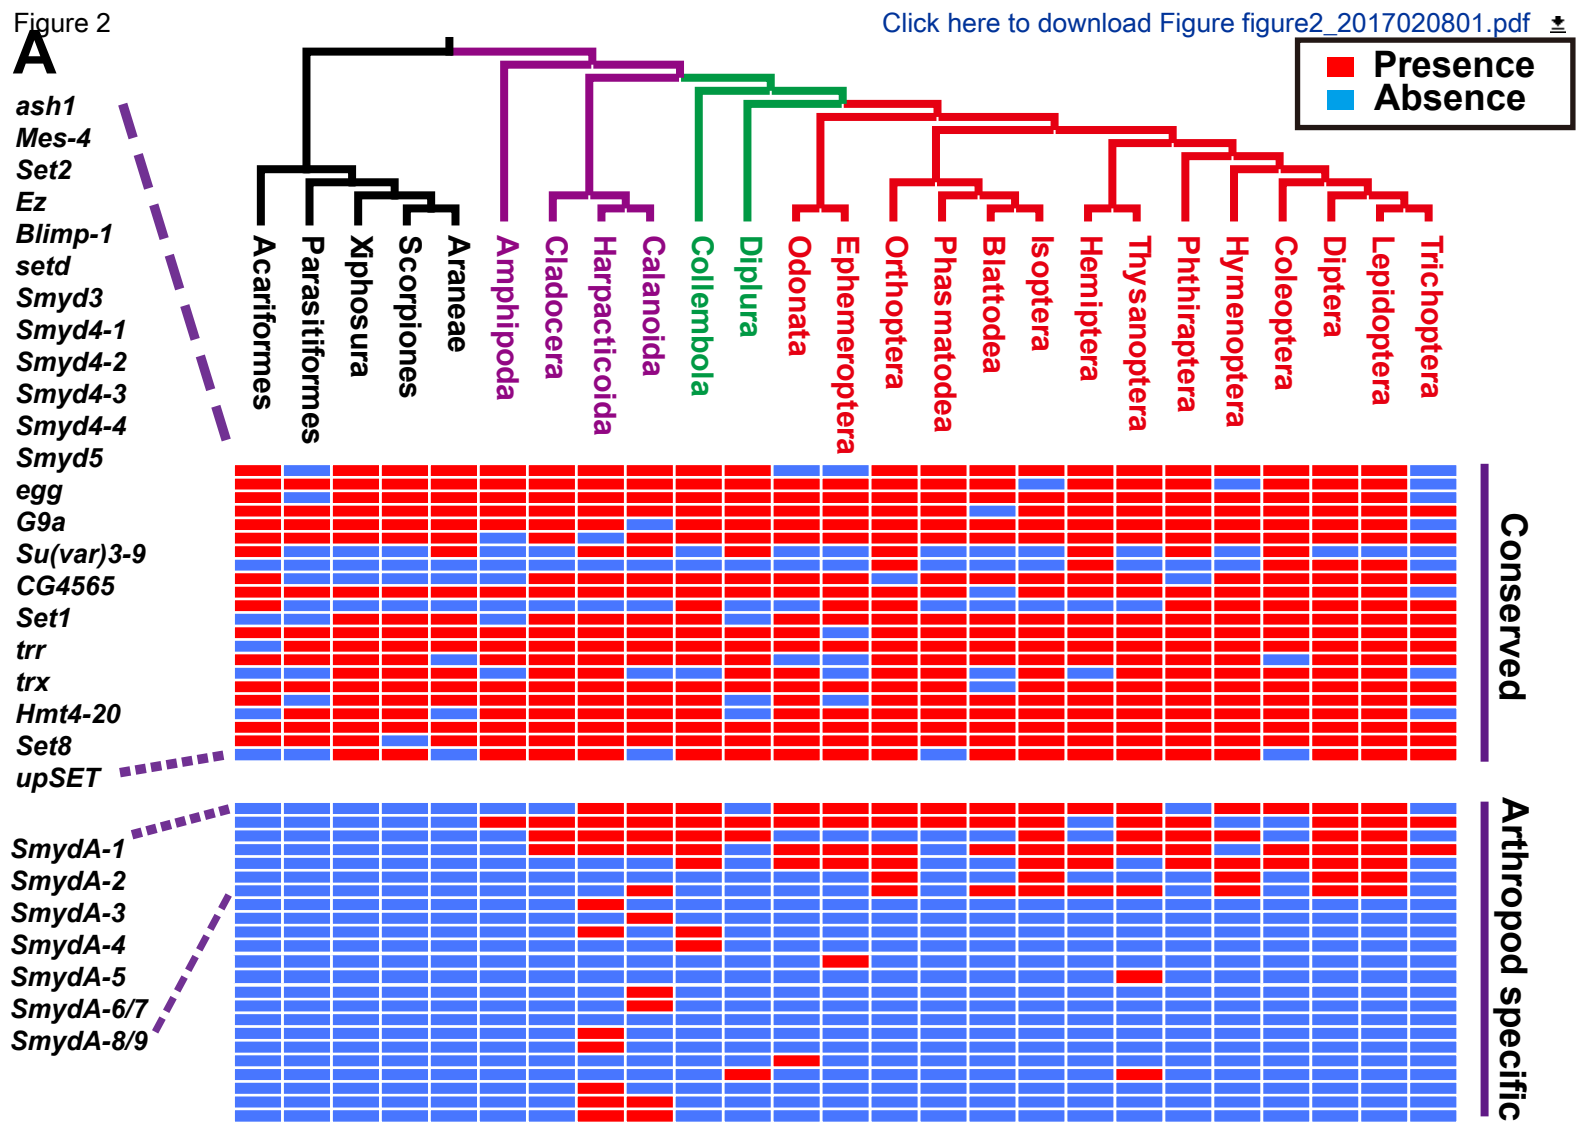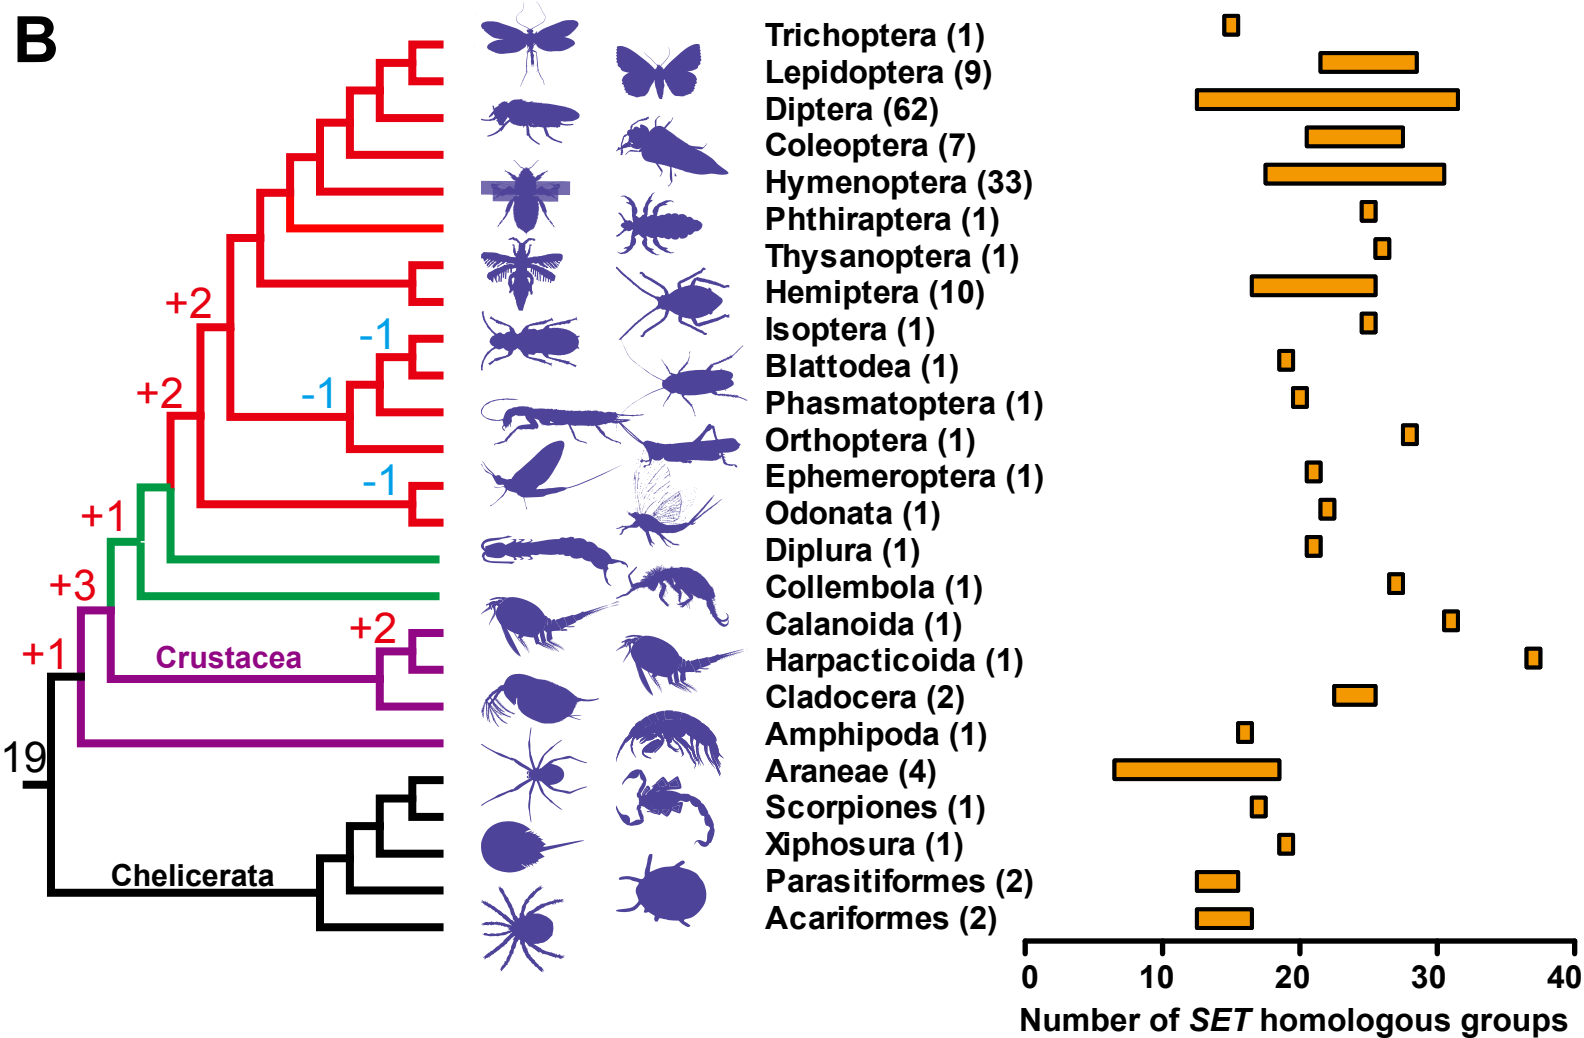



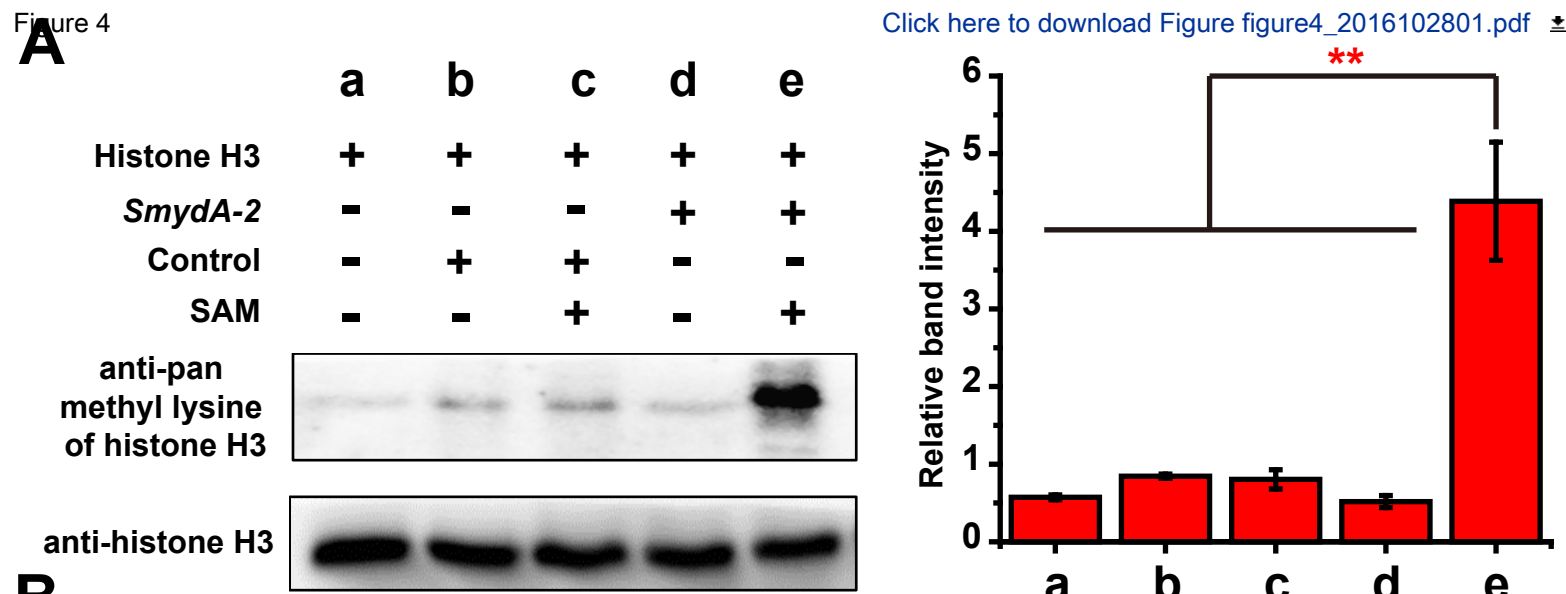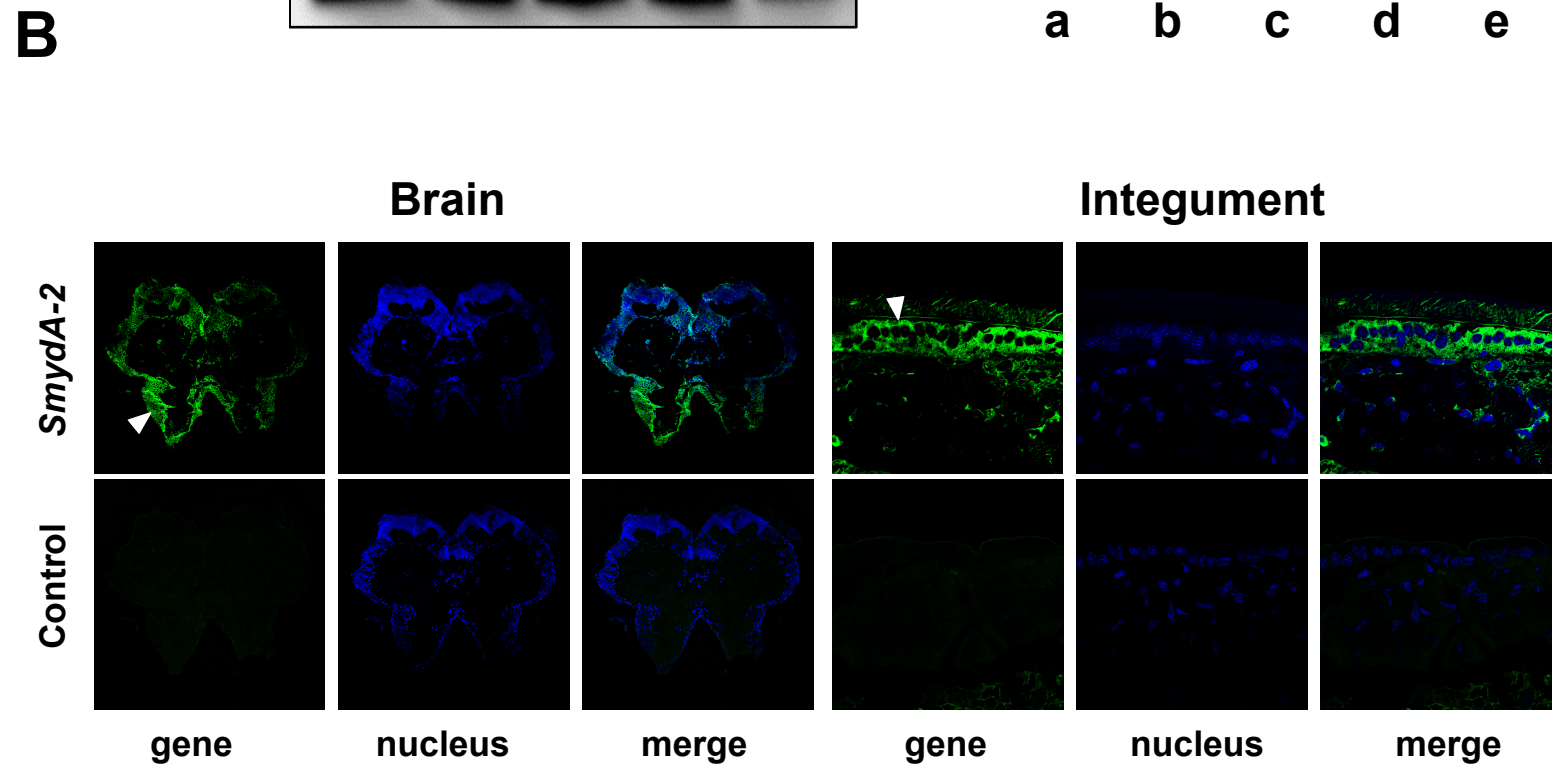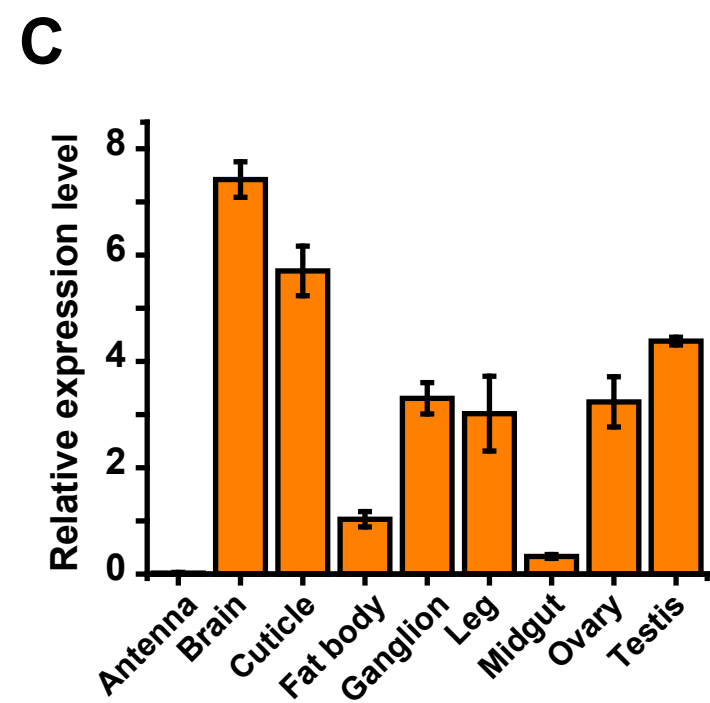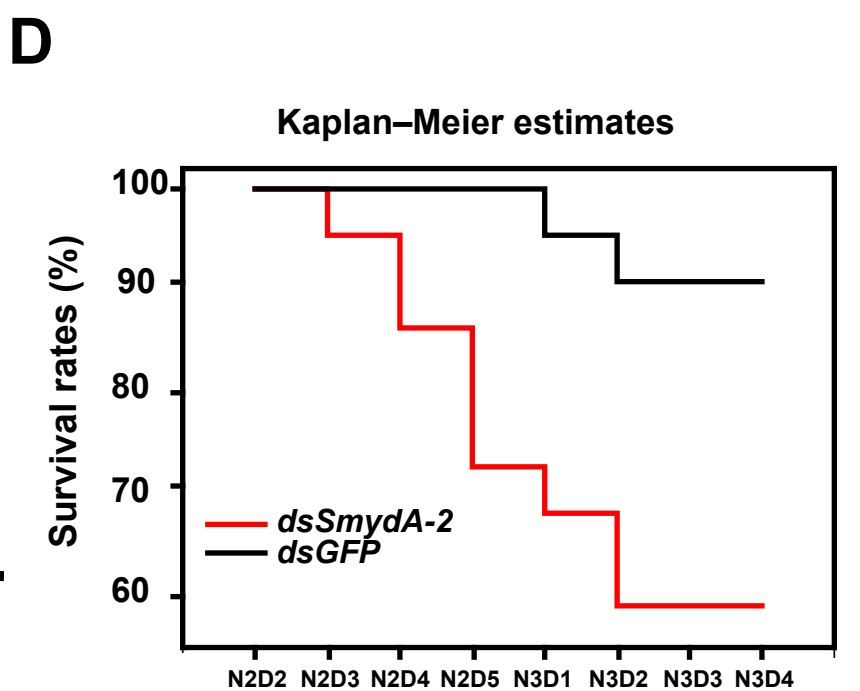





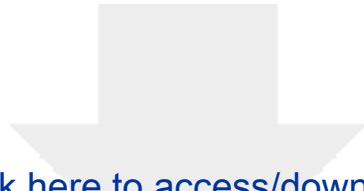

[Click here to access/download](#)

**Supplementary Material**

[insectsSetDomain\\_supply\\_giga\\_17021701.pdf](#)

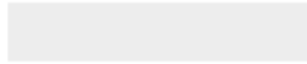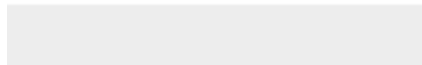

Supplement: gix031_GIGA-D-16-00127_Revision_1.pdf [file gix031_GIGA-D-16-00127_Revision_1.pdf]
