# Supplementary material for: Comparative genomic analysis of SET domain family reveals the origin, expansion, and putative function of the arthropod-specific SmydA genes as histone modifiers in insects
Source: PubMed Central journal article supplement (PMC5459927; doi:10.1093/gigascience/gix031), 2017-04-22

1 **Comparative genomic analysis of *SET*-domain family reveals the**  
2 **origin, expansion, and putative function of the arthropod-specific**  
3 ***SmydA* genes as histone modifiers in insects**

4 **Feng Jiang<sup>1,\*</sup>, Qing Liu<sup>1,2,\*</sup>, Yanli Wang<sup>2,3</sup>, Jie Zhang<sup>1</sup>, Huimin Wang<sup>1</sup>, Tianqi**  
5 **Song<sup>3</sup>, Meiling Yang<sup>2</sup>, Xianhui Wang<sup>2,#</sup>, Le Kang<sup>1,2,#</sup>**

6 <sup>1</sup> Beijing Institutes of Life Science, Chinese Academy of Sciences, Beijing, China

7 <sup>2</sup> State Key Laboratory of Integrated Management of Pest Insects and Rodents,  
8 Institute of Zoology, Chinese Academy of Sciences, Beijing, China

9 <sup>3</sup> Institute of Applied Biology, Shanxi University, Taiyuan, Shanxi, China

10 \*These authors contributed equally to this study.

11 Corresponding authors:

12 Le Kang, Ph.D. and Professor

13 Institute of Zoology, Chinese Academy of Sciences

14 Beijing 100101, China

15 Tel: 86-10-6480-7219

16 Fax: 86-10-6480-7099

17 E-mail: lkang@ioz.ac.cn

18 OR

19 Xianhui, Wang Ph.D. and Professor

20 Institute of Zoology, Chinese Academy of Sciences

21 Beijing 100101, China

22 Tel: 86-10-64807220

23 Fax: 86-10-6480-7099

24 E-mail: wangxh@ioz.ac.cn

Evolution of *SET* Genes in Insects

## 25 **Abstract**

26 The *SET* domain is an evolutionarily conserved motif present in histone lysine  
27 methyltransferases, which are important in the regulation of chromatin and gene  
28 expression in animals. In this study, we searched for *SET* domain-containing genes  
29 (*SET* genes) in all of the 147 arthropod genomes sequenced at the time of carrying out  
30 this experiment to understand the evolutionary history by which *SET* domain have  
31 evolved in insects. Phylogenetic and ancestral state reconstruction analysis revealed  
32 an arthropod-specific *SET* gene family, named *SmydA*, which is ancestral to arthropod  
33 animals and specifically diversified during insect evolution. Considering that  
34 pseudogenization is the most probable fate of the new emerging gene copies, we  
35 provided experimental and evolutionary evidence to demonstrate their essential  
36 functions. Fluorescence *in situ* hybridization analysis and *in vitro* methyltransferase  
37 activity assays showed that the *SmydA-2* gene was transcriptionally active and  
38 retained the original histone methylation activity. Expression knockdown by RNA  
39 interference significantly increased mortality, implying that the *SmydA* genes may be  
40 essential for insect survival. We further showed predominantly strong purifying  
41 selection on the *SmydA* gene family and a potential association between the regulation  
42 of gene expression and insect phenotypic plasticity by transcriptome analysis. Overall,  
43 these data suggest that the *SmydA* gene family retains essential functions that may  
44 possibly define novel regulatory pathways in insects. This work provides insights into  
45 the roles of lineage-specific domain duplication in insect evolution.

46 *Key words:* insects, domain, gene duplication, histone modification.

58 Evolution of *SET* Genes in Insects

## 47 **Background**

1  
2  
3 48 Protein domains are functional and structural units that are evolutionary well  
4  
5 49 conserved across species [1]. Specific protein domains are often linked to discrete  
6  
7  
8 50 biological function; therefore, the frequent duplication, gain, and loss of protein  
9  
10  
11 51 domains play substantial roles in functional novelty [2]. Domain duplication can be  
12  
13 52 achieved via frequent domain-containing gene family expansion. Thus, the member  
14  
15 53 number of a gene family that contains domains can be expanded, representing a  
16  
17  
18 54 common method by which divergence to domain sequences can lead to the  
19  
20 55 evolutionary novelty of domain-containing genes [3]. Rapid domain diversification in  
21  
22 56 particular lineages is important for the adaptation of lineage-specific ecological  
23  
24  
25 57 specializations [4].

27  
28 58 Histones are highly alkaline proteins in cell nuclei that package and order the  
29  
30 59 nuclear DNA into nucleosomes, which are the main components of chromatin.  
31  
32 60 Histone modifications are a major epigenetic regulatory mechanism for phenotypic  
33  
34  
35 61 plasticity in insects. Inhibition of histone deacetylation affects developmental  
36  
37 62 plasticity both in ants (*Camponotus floridanus*) and honeybees (*Apis mellifera*) [5, 6].  
38  
39  
40 63 Genome-wide profiling of histone modifications revealed an important role of histone  
41  
42 64 H3 lysine 27 acetylation in the caste differentiation of ants [7]. Methylations of  
43  
44 65 histone H3 lysine 27 and histone H3 lysine 36 are more abundant in queen ovaries  
45  
46  
47 66 than in larvae, implying that histone methylation plays a specific role in honey bees  
48  
49  
50 67 [8]. In recent years an increasing number of publications have established histone  
51  
52 68 lysine methylation as a central epigenetic modification in regulation of chromatin and  
53  
54 69 transcription. The *SET* domain, which is observed in many histone lysine  
55  
56  
57 70 methyltransferases, is widely and probably universally distributed in metazoan  
58  
59 Evolution of *SET* Genes in Insects  
60  
61  
62  
63  
64  
65

1  
2  
3  
4  
5  
6  
7  
8  
9  
10  
11  
12  
13  
14  
15  
16  
17  
18  
19  
20  
21  
22  
23  
24  
25  
26  
27  
28  
29  
30  
31  
32  
33  
34  
35  
36  
37  
38  
39  
40  
41  
42  
43  
44  
45  
46  
47  
48  
49  
50  
51  
52  
53  
54  
55  
56  
57  
58  
59  
60  
61  
62  
63  
64  
65

71 species. This protein family typically comprises an approximately 130 amino  
72 acid-long *SET* domain, which was identified in the strongest PEV suppressor gene  
73 *Su(var)3-9*, in the Pc-G gene Enhancer of zeste [E(z)] and in the activating *trx-G* gene  
74 *Trithorax* of *Drosophila* [9]. The *SET* domain possesses a catalytic activity that  
75 transfers a methyl group to the amino group of lysine residues of nuclear histones  
76 from S-adenosyl-L-methionine. Based on their biochemical characteristics, *SET*  
77 domain is capable of catalyzing mono-, di- or tri-methylation of their lysine  
78 substrates. *SET* domain-dependent methylation has been identified in a wide range of  
79 lysine residues in different histones: K4 (K is the abbreviation for lysine), K9, K27,  
80 K36, and K79 in histone H3; K20 in histone H4; K59 in the globular domain of  
81 histone H4; and K26 in histone H1B [10]. Methylation of lysine residues in histone  
82 proteins is an important post-translational epigenetic event that regulates gene  
83 expression by serving as an epigenetic marker for the recruitment of complexes that  
84 participate in the organization of chromatin structure [11]. The importance of  
85 *SET*-domain containing genes is strongly supported by the involvement of this protein  
86 family in diverse biological mechanisms, such as transcriptional activation,  
87 transcriptional repression, enhancer function, mRNA splicing and DNA replication  
88 [12]. Therefore, expectedly, the regulation of various *SET*-domain containing genes  
89 are increasing correlated with diverse epigenetic phenomena which, for example,  
90 include epigenetic control in plants, centromeric gene silencing in yeasts,  
91 repeat-induced point mutations in fungi, DNA elimination in *Tetrahymena*, germline  
92 chromatin silencing in worms and heterochromatin formation in flies [13].

93 Insects constitute a remarkably diverse group of organisms that make up a vast  
94 majority of known species with their importance including biodiversity, agricultural,

Evolution of *SET* Genes in Insects

1 95 and human health concerns. The insect lineage comprises species that are both  
2 96 cosmopolitan distributed and geographically restricted, showing a broad range of  
3  
4 97 adaptation diversity. The evolutionary history of gene families is not confounded by  
5  
6  
7 98 whole-genome duplication, and the major topology of insect species is well resolved  
8  
9  
10 99 [14]. Therefore, the insect lineage offers an excellent model to study domain/gene  
11  
12 100 evolution in the context of gene family dynamics [15-19]. Insect *SET*  
13  
14 101 domain-containing genes (*SET* genes) have been identified in a limited number of  
15  
16 102 representative insect species without complicated analysis [20-22]. The *Smyd*  
17  
18 103 subfamilies of *SET* genes have expanded in a few insects from Diptera and  
19  
20 104 Hymenoptera, and several members of the *Smyd* subfamilies show significant changes  
21  
22 105 in gene expression in response to phenotypic plasticity in ants [23, 24]. However, the  
23  
24 106 evolutionary history of insect *SET* genes remains largely unknown because the *SET*  
25  
26 107 genes from a broad range of insect species have not been combined in a single  
27  
28 108 evolutionary framework. Therefore, a comprehensive study of the origin and  
29  
30 109 diversification of the *SET* gene family in insects is required. Accurate classification of  
31  
32 110 *SET*-domain containing genes can pave the fundamental way to further understanding  
33  
34 111 the epigenetic basis of gene regulation in insects.

41 112 In the present study, we aimed to ascertain the origin and diversification of *SET*  
42  
43 113 genes in insects. We searched for *SET* genes in the 130 insect genomes and the 17  
44  
45 114 other arthropod genomes as outgroups. These 130 insect species include both  
46  
47 115 hemimetabolous and holometabolous insects and cover all the insect species for  
48  
49 116 which genome data have been fully available and annotated so far. Our phylogenetic  
50  
51 117 analysis revealed that an important diversification of arthropod-specific *SET* genes,  
52  
53 118 *SmydA*, occurred during insect evolution. Experimental evidence of the important

54  
55  
56  
57  
58 Evolution of *SET* Genes in Insects  
59  
60  
61  
62  
63  
64  
65

119 functions of *SmydA* genes in insects was obtained through fluorescence *in situ*  
120 hybridization, *in vitro* methyltransferase activity assay, and survival assay after  
121 expression knockdown. Furthermore, we compared the gene expression patterns and  
122 examined the selection signatures of *SmydA* genes in the four representative insects  
123 exhibiting phenotypic plasticity. These results provide insights into the regulatory  
124 roles of lineage-specific domain duplication in insect evolution.

125

## 126 **Results**

### 127 **Identification and phylogenetic classification of *SET* genes**

128 We comprehensively searched for *SET* genes in a wide range of sequenced insect  
129 species, which included 130 insect species from 14 insect orders (Supplementary  
130 Table S1). The *SET* genes were defined by the presence of the *SET* domain as  
131 predicted by the HMMER search, and their gene models were manually improved.  
132 Seventeen non-insect arthropods were also included to achieve ancestral status along  
133 with insect evolution. In total, 4,498 *SET* genes were identified in the 147 arthropod  
134 genomes (Supplementary Table S2). The genes showing potential pseudogene signals  
135 were removed in these identified *SET* genes. A database webserver  
136 (<http://159.226.67.242:8080/>) has been constructed to select, retrieve, and analyze the  
137 data in this study. In insects, the number of *SET* genes found per species ranges from  
138 16 in the scuttle fly *Megaselia scalaris* to 81 in the mosquito *Culex quinquefasciatus*  
139 (Table 1 and see Supplementary Table S3 for the full list of summary of *SET* genes in  
140 the 147 arthropod genomes). This observation suggests that the size of *SET* genes  
141 varies significantly among different insect lineages. Although the genome size of the  
142 migratory locust *Locusta migratoria* is approximately 30-fold that of the fruit fly

Evolution of *SET* Genes in Insects

143 *Drosophila melanogaster* [25] , the number of *SET* genes in locusts is comparable  
144 with that of flies. The specificity of certain substrates is reflected by the classification  
145 of *SET* genes, and *SET* genes can be classified into seven major conserved groups,  
146 namely: Suv, Ash, Trx, E(z), PRDM, SMYD, and SETD [20]. We performed  
147 phylogenetic analysis of the *SET* genes for representative species to obtain insights  
148 into the evolution of insect *SET* genes. Multiple sequence alignments of complete  
149 proteins could not accurately determine the homologous sites of *SET* genes because of  
150 the considerably different sequence lengths and domain architectures of these genes.  
151 Thus, alignment-based methods using Bayesian inferences for *SET* domain sequences  
152 and alignment-free methods based on feature frequency profiles for complete protein  
153 sequences were conducted to infer phylogenetic relationships. The overall tree  
154 topologies (Figure 1) inferred using the two methods were generally consistent. Based  
155 on the previous nomenclature system [20], the phylogenetic tree topology allows the  
156 grouping of insect *SET* genes into seven major conserved groups, generally showing  
157 slight fluctuation in the member sizes in each conserved group. The protein domains  
158 for each *SET* gene were annotated using the InterProScan package. In general, the  
159 *SET* genes in the same conserved group exhibited a similar domain composition,  
160 suggesting that the domain architectures support the conserved group classification  
161 inferred through the phylogenetic analysis. In addition to the *SET* genes in the  
162 conserved groups, a large number of *SET* genes could not be classified into known  
163 conserved groups on the basis of the phylogenetic analysis. These unclassified genes  
164 act as potential “arthropod-specific” genes. Indeed, a large number of these *SET* genes  
165 are homologous to the already defined arthropod-specific *SmydA* genes described in

166 the previous study [24]. The lineage-specificity was further verified through  
167 reciprocal BLAST search against known *SET* genes of nematodes and humans.

168

### 169 **Ancestral states of the *SET* gene family in insects**

170 A character matrix that represents the present/absent states for each *SET* homologous  
171 group (a OrthoMCL-based homolog set including both putative orthologs and  
172 paralogs) was constructed to infer the ancestral states of interior nodes along with the  
173 species tree using the Mesquite program. The ancestral states at different nodes could  
174 infer the emergences/losses of the *SET* homologous group that occurred at and above  
175 the level of orders (Figure 2). The grouping of *SET* homologous genes for each  
176 species was inferred using the OrthoMCL program with the corresponding  
177 orthologous *SET* gene in *D. melanogaster*, and the grouping reliability was supported  
178 by the phylogenetic analysis (Supplementary Figure S1–S5). The putative ancestral  
179 state was composed of 19 *SET* homologous groups present in the last common  
180 ancestor (LCA) of the studied arthropod species. Generally, the insect species  
181 possessed more *SET* homologous groups than the chelicerata species studied,  
182 suggesting that *SET* homologous groups considerably expanded during insect  
183 evolution. At the interior clades, novel *SET* homologous groups emerged several  
184 times. Only few losses of *SET* homologous groups, such as the loss of *SmydA-3*, were  
185 observed at the interior clades. The large fluctuation of *SET* homologous groups in  
186 each species indicates that these groups experienced rapid lineage-specific  
187 expansion/contraction within insect orders. For example, in Hymenoptera, the number  
188 of *SET* homologous groups ranged from 18 (covering 23 *SET* genes) in the jumping  
189 ant *Harpegnathos saltator* to 30 (covering 52 *SET* genes) in the parasitoid wasp  
Evolution of *SET* Genes in Insects



190 *Nasonia vitripennis*. In Diptera, 13 *SET* homologous groups (covering 14 *SET* genes)  
191 were found in *M. scalaris*, and the oriental fruit fly *Bactrocera dorsalis* possessed  
192 only 31 *SET* homologous groups (covering 45 *SET* genes). A large number of  
193 arthropod specific *SET* homologous groups cannot be classified into the seven major  
194 conserved groups, which revealed their origin after the emergence of main arthropod  
195 lineages. Nevertheless, at least six of these groups were present among insect species  
196 belonging to different orders, indicating their broad conservation in insects (Figure  
197 2A).

198 *SET* domains do not just function as an independent unit, as in many proteins it  
199 co-occurs with multiple other protein domains to regulate their target specificity and  
200 catalysis [12]. We surveyed the gene ontology (GO) classification of proteins by  
201 integrating biological knowledge into three hierarchies, namely, biological process,  
202 molecular function, and cellular component, to assess the function innovation of  
203 domain acquisition globally. The common GO categories included histone lysine  
204 methylation (GO:0034968), regulation of transcription (GO:0006355), protein  
205 binding (GO:0005515), nucleic acid binding (GO:0003676), and metal ion binding  
206 (GO:0046872) (Figure 3A). Partitioning of *SET* gene families between the conserved  
207 and arthropod specific groups revealed that GO categories could be shared between  
208 the two groups or be assigned exclusively to one group. The GO categories, which  
209 were only exclusive in the arthropod specific groups, included RNA  
210 methyltransferase activity (GO:0008173), metalloproteinase activity  
211 (GO:0004181), lysozyme activity (GO:0003796), homophilic cell adhesion  
212 (GO:0007156), sulfotransferase activity (GO:0008146) and so on.

213

Evolution of *SET* Genes in Insects

## 214 **Emergence of arthropod lineage-specific *SET* gene families**

215 Pairwise BLAST search against all the *SET* genes indicated that the arthropod specific  
216 *SET* genes showed considerable amino acid similarity to the SMYD groups, which  
217 contain a conserved core consisting of a *SET* domain and a MYND (Myeloid  
218 translocation protein, Nervy, Deaf) zinc finger domain [26]. The arthropod specific  
219 *SET* genes also contain the *SET* and MYND domains and were named *SmydA* [24].  
220 We performed the phylogenetic analysis of the SMYD genes through Bayesian  
221 inferences. The majority of the SMYD genes could be classified into 11 monophyletic  
222 clades, which exhibited similar high Bayesian posterior probability values (Figure  
223 3B). In a global view, these SMYD genes fell into two distinct branches, which  
224 correspond with the conserved SMYD and *SmydA* groups. These results could  
225 exclude the possibility that the *SmydA* groups have raised from multiple independent  
226 gain events by duplications from deeply diverged SMYD genes of insects. Indeed, as  
227 shown in Figure 2A, *SmydA* genes were absent from in all Chelicerata species  
228 investigated but present in the genomes of crustacean species and insect species,  
229 suggesting that *SmydA* genes may have originated prior to the divergence of Crustacea  
230 and Insecta. *SmydA-1*, *SmydA-2*, *SmydA-3*, and *SmydA-6* were already present before  
231 the split of Crustacea with other insects, showing clues for their ancient duplication  
232 events. The strong support for distinct individual lineages of paralogous genes implied  
233 that multiple duplications occurred within the order level; the most notable case was  
234 the detection of three copies of *SmydA-3* in the red flour beetle *Tribolium castaneum*  
235 (Supplementary Table 2). *SmydA-1/SmydA-4* and *SmydA-6* were subjected to  
236 additional rounds of duplication in Lepidoptera and Orthoptera, respectively. The  
237 genes annotated as *SmydA-8* and *SmydA-9* in *D. melanogaster* previously formed a

Evolution of *SET* Genes in Insects

1  
2  
3  
4  
5  
6  
7  
8  
9  
10  
11  
12  
13  
14  
15  
16  
17  
18  
19  
20  
21  
22  
23  
24  
25  
26  
27  
28  
29  
30  
31  
32  
33  
34  
35  
36  
37  
38  
39  
40  
41  
42  
43  
44  
45  
46  
47  
48  
49  
50  
51  
52  
53  
54  
55  
56  
57  
58  
59  
60  
61  
62  
63  
64  
65

238 single clade alone with a high Bayesian posterior probability value (0.99), suggesting  
239 a specific duplication event in *Drosophila*. Therefore, the *SmydA* groups differed  
240 considerably in the number of genes in each insect order, implying the complexity of  
241 their evolutionary histories.

242 To shed light into the evolutionary history of *SmydA* genes, we determined the  
243 location and gene order of *SmydA* genes in the four holometabolous species with  
244 available chromosome-level genome assemblies or genome-scale genetic linkage  
245 maps (Figure 3C). In Diptera, the syntenic gene orders could be inferred from the four  
246 ancient *SmydA* genes, namely, *SmydA-1*, *SmydA-2*, *SmydA-3*, and *SmydA-6*, all of  
247 which may have been present in the ancestor of insects and crustaceans. An  
248 insect-specific *SmydA-9* could be observed in the majority of insect orders, including  
249 both hemimetabolous and holometabolous insects. *SmydA-9* showed syntenic  
250 conservation with the four ancient genes. This gene order was also conserved when  
251 *SmydA* genes in insects distantly related from other insect orders were examined.  
252 Almost all of the five synteny-anchoring genes were maintained in both the  
253 coleopteran species *T. castaneum* and hymenoptera species *A. mellifera*, with an  
254 exception of *SmydA-2* that was missed in *A. mellifera*. In contrast to those in *T.*  
255 *castaneum* and *A. mellifera*, the reversed order of *SmydA-3* and *SmydA-6* in Dipteran  
256 species implies that an intrachromosome transfer event of genomic segments occurred  
257 before the emergence of Diptera. Duplication events could also occur in the early  
258 diversification of arthropod species. No orthologous *SmydA-4* gene was detected the  
259 chelicerata species, indicating that duplication event contributes to the emergence of  
260 *SmydA-4* gene in Pancrustacea species. *SmydA-4* was present in all the  
261 hemimetabolous insect orders studied, as well as in the holometabolous insect orders

1  
2  
3  
4  
5  
6  
7  
8  
9  
10  
11  
12  
13  
14  
15  
16  
17  
18  
19  
20  
21  
22  
23  
24  
25  
26  
27  
28  
29  
30  
31  
32  
33  
34  
35  
36  
37  
38  
39  
40  
41  
42  
43  
44  
45  
46  
47  
48  
49  
50  
51  
52  
53  
54  
55  
56  
57  
58  
59  
60  
61  
62  
63  
64  
65

262 Lepidoptera, Coleoptera, and Diptera. The absence of *SmydA-4* in all the 32  
263 hymenopteran species suggested that subsequent loss of *SmydA-4* could be traced  
264 back to the ancestor of the hymenopteran lineage before the divergence of wasp, ants,  
265 and bees. In the SMYD phylogenetic tree, the Bayesian inferences supported the  
266 grouping of *SmydA-3*, *SmydA-4*, and *SmydA-6*. Three of the four species exhibited a  
267 accordant location of *SmydA-3/SmydA-4/SmydA-6* in the syntenic regions. In addition  
268 to the old duplication events that categorized the divergent duplicates into distinct  
269 *SmydA* subfamilies (e.g., *SmydA-3* and *SmydA-4*), recent duplications within an insect  
270 order were also observed. The three copies of *SmydA-3* in *T. castaneum*, which  
271 spanned within a 4.2 kb genomic region, were observed in tandem array between the  
272 two syntenic genes *SmydA-1* and *SmydA-6*. The closeness in protein sequence and  
273 genomic location implies an evolutionary origin of these three copies of *SmydA-3* via  
274 local duplication. Overall, our data suggest that the order of *SmydA* genes was  
275 conserved over a remarkable wide range of holometabolous insect orders.

### 277 **Selective pressures acting on *SmydA* genes**

278 Functional differentiations or mutations leading to pseudogene formation are the two  
279 major causes for sequence divergence between new duplicates and their orthologous  
280 counterpart. Synonymous substitutions are assumed to accumulate at a constant rate;  
281 hence, the ratios of nonsynonymous substitution per nonsynonymous site ( $d_N$ ) to  
282 synonymous substitution per synonymous site ( $d_S$ ) are deemed to be an indicator to  
283 measure the relative rates of evolution for protein sequences. The four genes  
284 (ACYPI26757 and ACYPI55839 in *Acyrtosiphon pisum*; Px015362.1 and  
285 Px001029.1 in *Plutella xylostella*) showing signals of recombination were removed

1  
2  
3  
4  
5  
6  
7  
8  
9  
10  
11  
12  
13  
14  
15  
16  
17  
18  
19  
20  
21  
22  
23  
24  
25  
26  
27  
28  
29  
30  
31  
32  
33  
34  
35  
36  
37  
38  
39  
40  
41  
42  
43  
44  
45  
46  
47  
48  
49  
50  
51  
52  
53  
54  
55  
56  
57  
58  
59  
60  
61  
62  
63  
64  
65

286 from the further selection analysis. We estimated a global  $d_N/d_S$  ratio (one ratio, model  
287 M0) for these *SET* genes to determine whether the *SmydA* genes have been under  
288 different selection pressures than the other conserved *SET* genes. The  $d_N/d_S$  ratios ( $\omega$   
289 =  $d_N/d_S$  ratio) of *SET* genes varied from low (0.0007, Ez, CG6502) to high (0.1627,  
290 *Smyd4-1*, CG1868), indicating a variance in the rates of protein evolution on different  
291 *SET* genes (Table 2). The  $\omega$  values among the conserved *SET* genes (excluding the  
292 SMYD genes) ranged from 0.0007 to 0.0624 (mean  $\omega$  = 0.0185). The conserved  
293 SMYD and *SmydA* groups showed  $\omega$  values in the ranges of 0.055–0.1627 (mean  $\omega$  =  
294 0.1020) and 0.0052–0.1623 (mean  $\omega$  = 0.0884), respectively. Overall, both the  
295 conserved SMYD and *SmydA* ( $P$  = 0.0003 and  $P$  = 0.0178, Wilcoxon signed-rank  
296 tests with Bonferroni correction, respectively) groups exhibited significantly higher  $\omega$   
297 values than the conserved *SET* genes (Figure 3D). However, the distributions of  $\omega$   
298 values of the conserved SMYD and *SmydA* groups were statistically indistinguishable  
299 ( $P$  = 1.0000, Wilcoxon signed-rank tests with Bonferroni correction).

300

### 301 **Function approval of *SmydA* genes**

302 We attempted to determine whether the *SmydA* genes retained histone methylation  
303 activities to approve the non-pseudogenization process of these genes. We expressed  
304 *SmydA-2* as a randomly selected representative and performed *in vitro* histone  
305 methylation activity assays using histones as substrates in the migratory locust. As  
306 shown in Figure 4A, Western blot analysis detected increased lysine methylation on  
307 histone H3 compared with the controls, indicating that *SmydA-2* possesses  
308 methyltransferase activity on histones. Similar to that of the other conserved SMYD  
309 genes, the methyltransferase activity of *SmydA-2* was also dependent on S-adenosyl  
Evolution of *SET* Genes in Insects

1  
2  
3  
4  
5  
6  
7  
8  
9  
10  
11  
12  
13  
14  
15  
16  
17  
18  
19  
20  
21  
22  
23  
24  
25  
26  
27  
28  
310 methionine. Fluorescence *in situ* hybridization analysis provided further tissue  
311 expression evidence to support the reliability of the *SmydA-2* gene function. Obvious  
312 fluorescence signals were observed in the brain and epidermal cells of cuticle in the  
313 locusts (Figure 4B). These cells did not show any hybridization signal for the negative  
314 controls. The origin and evolution of new emerging genes undergo an increased  
315 expression breadth of new duplicated genes over evolutionary time [27, 28]. Thus, we  
316 determined the expression levels of the *SmydA-2* gene using quantitative real-time  
317 polymerase chain reaction (qPCR) analysis in the different tissues. qPCR data showed  
318 that the *SmydA-2* gene was expressed in a broad range of tissues, including brains,  
319 testes, ovaries, cuticles, and legs (Figure 4C). The broad expression pattern suggests  
320 that the *SmydA-2* gene is less tissue specific and may serve as a functional gene in  
321 multiple tissues [28].

29  
30  
31  
32  
33  
34  
35  
36  
37  
38  
39  
40  
41  
42  
43  
44  
45  
46  
47  
48  
49  
50  
51  
52  
53  
54  
55  
56  
57  
58  
59  
60  
61  
62  
63  
64  
65  
322 Essential genes are often considered as conserved and functionally important [29] ,  
323 whereas pseudogenes have been considered to be more dispensable and to have minor  
324 influences on survival and phenotype. To determine whether the *SmydA-2* gene plays  
325 an essential role during development [30], we knocked its expression down by using  
326 RNA interferences in the locusts. Compared with the controls, the relative mRNA  
327 level of the *SmydA-2* gene decreased by approximately 70% after injecting  
328 double-strand RNAs (Supplementary Figure S6). After injection of *dsSmydA-2*, we  
329 observed large numbers of dead locusts, which did not display obvious defect  
330 phenotype. As shown in Figure 4D, Kaplan–Meier survival estimates indicate that  
331 injection of locusts with *dsSmydA-2* significantly increased mortality when compared  
332 with the controls ( $\chi^2 = 6.260$ ,  $df = 1$ ,  $P = 0.0123$ , Chi-square tests).

**334 Expression and selection analysis of *SmydA* genes in response to phenotypic plasticity**

1  
2 335 Epigenetic reprogramming that modifies chromatin structure through histone  
3  
4 336 modifiers contributes to orchestrate the generation and maintenance of phenotypic  
5  
6  
7 337 plasticity, which is a key trait for the success of insects. Therefore, we compared the  
8  
9 338 expression patterns of histone-modifier *SET* genes in four representative insects  
10  
11 339 exhibiting phenotypic plasticity, namely, locust density-dependent behavior, aphid  
12  
13 340 seasonal morphs, dietary-mediated interactions of bees and ants. Specially, we  
14  
15 341 performed differential expression analysis between gregarious and solitary locusts,  
16  
17 342 between asexual and sexual morphs in *A. pisum*, between queens and workers in *A.*  
18  
19 343 *mellifera*, and between large workers and queens in *Acromyrmex echinator*. In all the  
20  
21 344 four species, a number of differentially expressed genes (DEGs) were detected  
22  
23 345 between the two alternative phenotypes using the criteria of a false discovery rate  
24  
25 346 (FDR)-corrected  $P < 0.05$ . In terms of DEG number, a large portion of *SET* genes  
26  
27 347 showed significant changes in gene expression (12 in 29, 41%, in *A. mellifera*; 23 in  
28  
29 348 62, 37%, in *A. pisum*; 11 in 29, 38%, in *L. migratoria*; and 10 in 27, 37%, in *A.*  
30  
31 349 *echinator*). Compared with that of the DEGs observed at the genome-wide level  
32  
33 350 (DEGs in total), the number changes of the DEGs in *SET* genes in the four insects  
34  
35 351 were even more prominent, emphasizing the important regulatory role of *SET* genes  
36  
37 352 in phenotypic transition ( $P_s < 0.05$ , Chi-square tests). Overlapping of the  
38  
39 353 differentially expressed *SET* genes derived from the same ortholog could provide a  
40  
41 354 clue of their convergent function in phenotypic transition. We found two *SET* genes,  
42  
43 355 namely, *Set2* and *SmydA-5*, showed significant changes in gene expression  
44  
45 356 simultaneously in three of the four insect species studied.  
46  
47  
48  
49  
50  
51  
52  
53  
54  
55  
56  
57  
58  
59  
60  
61  
62  
63  
64  
65

Evolution of *SET* Genes in Insects

1  
2  
3  
4  
5  
6  
7  
8  
9  
10  
11  
12  
13  
14  
15  
16  
17  
18  
19  
20  
21  
22  
23  
24  
25  
26  
27  
28  
29  
30  
31  
32  
33  
34  
35  
36  
37  
38  
39  
40

357 Assuming that a non-pseudogene gene should not be randomly expressed, we  
358 compared the expression pattern of the duplication-derived *SmydA* genes to their  
359 derived ancestral SMYD genes in response to environment-dependent phenotypic  
360 plasticity (Figure 5). The majority of *SET* genes from the conserved SMYD (33 in 34  
361 in total, 97%) and *SmydA* (13 in 17 in total, 76%) groups were expressed in at least  
362 one insect. No significant differences ( $P = 0.749$ , Chi-Square tests) in the number of  
363 expressed genes were observed between the two groups. A number of DEGs were  
364 detected in both the conserved SMYD and *SmydA* groups in the four insect species.  
365 All the four *SmydA* genes in *A. echinator* were also differentially expressed. We also  
366 obtained significant results in three of the six *SmydA* genes of *L. migratoria* and in  
367 two of the five *SmydA* genes of *A. mellifera* between the two alternative phenotypes.  
368 The DEG number in the *SmydA* groups did not show significant deviation from those  
369 in the conserved SMYD group in the four insects ( $P_s > 0.2$ , Fisher's exact tests). This  
370 result suggests that the *SmydA* genes might not be randomly expressed and that they  
371 did not represent pseudogenes or transcriptional byproducts. Thus, the *SmydA* genes  
372 may preserve a regulatory role, indicating the function similarity to their ancestral  
373 SMYD genes.

41  
42  
43  
44  
45  
46  
47  
48  
49  
50  
51  
52  
53  
54  
55  
56  
57  
58  
59  
60  
61  
62  
63  
64  
65

374 The free ratio model of *SmydA* genes fitted the data significantly better than the  
375 one model (model M0) using likelihood ratio tests ( $P_s < 0.001$ ), indicating  
376 heterogeneous rates of sequence evolution along the gene tree of *SmydA* genes.  
377 Therefore, we tested whether the differentially expressed *SmydA* genes between  
378 alternative phenotypes (foreground branches) evolved under different selective  
379 pressures than those in the remaining branches (background branch) (Supplementary  
380 Figure S7). The branch model was much better supported by the data than the model



1  
2  
3  
4  
5  
6  
7  
8  
9  
10  
11  
12  
13  
14  
15  
16  
17  
18  
19  
20  
21  
22  
23  
24  
25  
26  
27  
28  
29  
30  
31  
32  
33  
34  
35  
36  
37  
38  
39  
40  
41  
42  
43  
44  
45  
46  
47  
48  
49  
50  
51  
52  
53  
54  
55  
56  
57  
58  
59  
60  
61  
62  
63  
64  
65

381 M0 for *SmydA-5* in *A. mellifera* and *SmydA-1* in *L. migratoria* (Table 3). Fixing  $\omega = 1$   
382 for the foreground branch did not result in an improved fit over the branch model with  
383 the unconstrained foreground branch (the null neutral model and the alternative  
384 model). This result suggests that the  $\omega$  values in the external branch were smaller than  
385 1 for *SmydA-3* and *SmydA-5* in *A. mellifera*, *SmydA-1* in *L. migratoria*, and *SmydA-3*  
386 in *A. echinator*. Only *SmydA-1* in *L. migratoria* exhibited elevated  $\omega$  values, and a  
387 branch-site model allowing heterogeneous  $\omega$  values across sequences and branches  
388 identified four sites (5M, 11K, 93P, and 105C) under positive selection.

389

## 390 Discussion

391 In this study, the phylogenetic analyses allowed the subdivision of the insect *SET*  
392 genes into seven major conserved groups and one arthropod-specific *SmydA* group.  
393 We inferred many *SmydA* gene duplication events along insect evolution, suggesting  
394 an important diversification of the *SmydA* genes occurred during insect evolutionary  
395 processes. With the *SmydA-2* genes in locusts as representatives, the maintenance of  
396 essential gene function was confirmed from the experimental evidence of *in vitro*  
397 methyltransferase activity, *in situ* mRNA expression, and phenotypes after expression  
398 knockdown. Based on the examination of distribution pattern and selection signatures  
399 across insects, our data indicated that extensive pseudogenization unlikely occurred  
400 for the *SmydA* genes. Finally, the transcriptome analyses of the four insects showed  
401 that several *SmydA* genes are involved in insect phenotype plasticity, suggesting that  
402 *SmydA* genes contributed novelties for insect adaptive evolution. This data suggests a  
403 role of diverged regulatory functions after their duplication in insects.

Evolution of *SET* Genes in Insects

1  
2  
3  
4  
5  
6  
7  
8  
9  
10  
11  
12  
13  
14  
15  
16  
17  
18  
19  
20  
21  
22  
23  
24  
25  
26  
27  
28  
29  
30  
31  
32  
33  
34  
35  
36  
37  
38  
39  
40  
41  
42  
43  
44  
45  
46  
47  
48  
49  
50  
51  
52  
53  
54  
55  
56  
57

404 A recent study has provided a framework for understanding the evolution history  
405 of SMYD gene family in representative animal phyla [24]. The phylogenetic results  
406 show that the metazoan SMYD genes can be classified in three main classes, *Smyd3*,  
407 *Smyd5* and *Smyd4*. Two sub-classes of SMYD genes, namely *Smyd4-4* and *SmydA*,  
408 are absent in vertebrates; the former one is insect-specific and the later one is  
409 arthropod-specific. Within Chelicerata, we detected *Smyd4-4* in Acariform mites  
410 (non-insect arthropods), suggesting our evidence did not support the point that  
411 *Smyd4-4* is specific of insects. Since Chelicerata represents an out-group branch for  
412 this study, further studies covering more basal branches of arthropod phylogeny are  
413 required to ascertain the origin of *Smyd4-4*. *SmydA* genes represent a class of  
414 arthropod-specific genes that are only present in the LCA of insect species and  
415 crustacean species, suggesting their origin after the split of chelicerates from  
416 Pancrustacea species. Conservation of five ancient *SmydA* genes in a wide range of  
417 species suggests they probably originated from duplication events of conserved  
418 SMYD genes predating the diversification of insects. Although a few cases of  
419 whole-genome duplication have been documented in chelicerates, evidence that  
420 whole-genome duplication occurs widely in arthropod evolution remains lacking [31].  
421 Therefore, gene duplication rather than whole-genome duplication possibly leads to  
422 the emergence of multiple copies of ancient *SmydA* genes in the LCA of Pancrustacea  
423 species. The clear split of conserved SMYD and *SmydA* genes excluded the  
424 possibility that multiple independent duplication events from conserved SMYD genes  
425 resulted in the current repertoire of *SmydA* genes in insects. This result suggests that  
426 the five ancient *SmydA* genes were first produced from a single ancestral gene, which  
427 was derived from conserved SMYD genes. The five ancient *SmydA* genes were thus

58 Evolution of *SET* Genes in Insects  
59  
60  
61  
62  
63  
64  
65

1  
2  
3  
4  
5  
6  
7  
8  
9  
10  
11  
12  
13  
14  
15  
16  
17  
18  
19  
20  
21  
22  
23  
24  
25  
26  
27  
28  
29  
30  
31  
32  
33  
34  
35  
36  
37  
38  
39  
40  
41  
42  
43  
44  
45  
46  
47  
48  
49  
50  
51  
52  
53  
54  
55  
56  
57  
58  
59  
60  
61  
62  
63  
64  
65

428 the source from which insect-specific *SmydA* duplications were subsequently  
429 produced in insects. Determining the location and order of multiple gene members at  
430 the genomic scale sheds light on the evolutionary history of gene family. The closely  
431 linked manner in genomic location suggests that homologous recombination and  
432 functional differentiation may be a major force to shape the evolution of *SmydA* genes  
433 in insects. For instance, in dipteran and lepidopteran insects, homologous  
434 recombination may give rise to *SmydA-6* via the duplication events of *SmydA-3*  
435 because *SmydA-3* and *SmydA-6* were in close proximity to each other in both genomic  
436 location and phylogenetic trees. The tandem organization of three *SmydA-3* copies in  
437 *T. castaneum* may also result from species-specific duplications via homologous  
438 recombination. Retrotransposition events may represent another contributing force for  
439 generating unlinked *SmydA* genes; these events can also generate intronless  
440 retroposed gene copies [32]. However, the retrotransposition events could not be  
441 inferred from the presence of signature of intron–exon structure because of the  
442 subsequent insertion in deeply diverged duplicates, such as *SmydA-5*. Conserved gene  
443 orders between species from Lepidoptera, Coleoptera, and Diptera revealed a high  
444 degree of macrosyntenic gene order of the five ancient *SmydA* genes during  
445 approximately 348 million years of evolutions splitting these insects [33]. This  
446 observation implies strong constraints for preserving the conserved gene order of  
447 *SmydA* genes in insects. Currently, whether this macro-syntenic gene order is  
448 preserved outside holometabolous insects cannot be determined because  
449 chromosome-level genome assemblies or genome-scale genetic linkage maps are not  
450 available in hemimetabolous insects. This issue would be addressed when the genome  
451 assembly is considerably improved in the future.

Evolution of *SET* Genes in Insects

1  
2  
3  
4  
5  
6  
7  
8  
9  
10  
11  
12  
13  
14  
15  
16  
17  
18  
19  
20  
21  
22  
23  
24  
25  
26  
27  
28  
29  
30  
31  
32  
33  
34  
35  
36  
37  
38  
39  
40  
41  
42  
43  
44  
45  
46  
47  
48  
49  
50  
51  
52  
53  
54  
55  
56  
57  
58  
59  
60  
61  
62  
63  
64  
65

452 Selective pressures were significantly weaker for the SMYD genes than for the  
453 six conserved groups (Suv, Ash, Trx, E(z), PRDM, and SETD). Compared with the  
454 six conserved groups, SMYD genes were the least conserved gene group and,  
455 concordantly, the least constrained one. Nevertheless, the  $\omega$  values of SMYD genes  
456 ranged from 0.0052 for *SmydA-2* to 0.1627 for *Smyd4-1*.  $\omega \ll 1$  was consistent with  
457 their broad conservation across insects, implying their essential functional roles. This  
458 observation suggests that purifying selection is the main force governing the evolution  
459 of SMYD genes. The distributions of  $\omega$  values of the conserved SMYD and *SmydA*  
460 genes were statistically indistinguishable, indicating a symmetrical rate of sequence  
461 evolution. Thus, purifying selection is subject to the conserved SMYD and *SmydA*  
462 genes, but their intensity may be relaxed compared with other *SET* genes. Both the  
463 GO analysis and the *in vitro* methyltransferase activity assay suggest that *SmydA*  
464 genes, similar to their conserved SMYD ancestors, are sufficient to perform the  
465 original function relating to histone methylation [34]. GO ontology analysis implied  
466 that the *SmydA* genes have developed to acquire novel functions. These functions  
467 were absent in the conserved SMYD genes, indicating that the *SmydA* genes may have  
468 undergone functional differentiation. Gene duplications that occurred in specific  
469 lineages are important in contributing to lineage-specific adaptive processes [35].  
470 After gene duplication, purifying selection is expected in both gene copies if  
471 duplication can confer a selective advantage [36]. By contrast, one of the two copies  
472 can evolve either under relaxed purifying selection when no immediate advantage is  
473 shown from gene duplication or under positive selection when a new function is  
474 acquired via advantageous mutations [37]. Overall, these data suggest that the *SmydA*  
475 genes may not represent redundant gene copies that are under pseudogenization.

Evolution of *SET* Genes in Insects

1  
2  
3  
4  
5  
6  
7  
8  
9  
10  
11  
12  
13  
14  
15  
16  
17  
18  
19  
20  
21  
22  
23  
24  
25  
26  
27  
28  
29  
30  
31  
32  
33  
34  
35  
36  
37  
38  
39  
40  
41  
42  
43  
44  
45  
46  
47  
48  
49  
50  
51  
52  
53  
54  
55  
56  
57  
58  
59  
60  
61  
62  
63  
64  
65

476 Several members of the SMYD family of histone methyltransferases have  
477 undergone a dramatic expansion in the insect lineage [23]. These SMYD genes were  
478 identified as caste-specific genes in ants (*Harpegnathos saltator*), suggesting that  
479 these histone modifiers play dedicated regulatory roles in insect phenotypic plasticity.  
480 However, the biological significance of the differential expressions of these genes  
481 remains unknown [38]. Our study further verified the presence of the differential  
482 expression patterns of the SMYD genes in the four other insects that also possessed  
483 adaptive phenotypic plasticity. Consequently, the understanding of convergent  
484 regulatory roles of the SMYD genes in insect phenotypic plasticity was extended.  
485 Histone lysine methyltransferase catalyzes methyl group transfer to the amino group  
486 of lysine residues of histones by means of the *SET* domain, a domain presented within  
487 many proteins that regulate diverse development processes [39]. Histone lysine  
488 methylation on specific residues is associated with distinct signatures of gene  
489 expression, thereby serving as a chromatin modulator for epigenetic regulation [40].  
490 Future studies should understand how the expanded SMYD gene family can quickly  
491 become essential and identify the roles of the duplicated SMYD genes in insects,  
492 despite the expectation of redundant functionality at the beginning of new duplicated  
493 gene evolution [30].

494

## 495 **Materials and Methods**

### 496 **Identification of insect *SET* genes**

497 Genome assemblies and official gene sets of 130 insect species, including 62 dipteran  
498 insects, 33 hymenopteran insects, 10 hemipteran insects, 7 coleopteran species, 9  
499 lepidopteran insects, and representatives from Orthoptera, Phthiraptera,

Evolution of *SET* Genes in Insects

1  
2  
3  
4  
5  
6  
7  
8  
9  
10  
11  
12  
13  
14  
15  
16  
17  
18  
19  
20  
21  
22  
23  
24  
25  
26  
27  
28  
29  
30  
31  
32  
33  
34  
35  
36  
37  
38  
39  
40  
41  
42  
43  
44  
45  
46  
47  
48  
49  
50  
51  
52  
53  
54  
55  
56  
57  
58  
59  
60  
61  
62  
63  
64  
65

500 Phasmatoptera, Trichoptera, Thysanoptera, Isoptera, Blattodea, Ephemeroptera and  
501 Odonata, were obtained from their respective genome databases (Supplementary  
502 Table S1). Among the basal arthropod species, we included 17 arthropod genomes  
503 from 10 chelicerate species, five crustacean species and two non-insect hexapod  
504 species.

505 The hidden Markov model-based HMMER program was used to identify the *SET*  
506 domain containing proteins using PF00856 in the Pfam database with a conditional  
507 E-value cutoff of  $1e-5$  [41, 42]. Despite that the *SET* domain can be detected in their  
508 homologs in closely related species, the genes lacking SET domain were considered  
509 as deprived of lysine methylation capacity and were excluded for further analysis. The  
510 resulting genes with stop codons or frameshift mutations were subsequently manually  
511 checked. The obvious incorrect gene models were improved with transcriptome data  
512 through the GeneWise version 2.2.0 program [43]. The PSILC version 1.21 program  
513 was used to identify the potential pseudogenes [44]. Gene Ontology (GO) categories  
514 were determined via scanning protein sequences against Interpro member databases  
515 using various profile-based and hidden Markov models in the InterProScan version  
516 5.13-52.0 package [45]. The member database binaries and models include  
517 TIGRFAM, ProDom, Panther, SMART, PrositePatterns, SuperFamily, PRINTS,  
518 Gene3d, PIRSF, PfamA and PrositeProfiles.

#### 519 520 **Phylogenetic analysis, ancestral state reconstructions, and tests for selection**

521 Alignment-based methods using Bayesian inferences for *SET* domain sequences and  
522 alignment-free methods based on feature frequency profiles for complete protein  
523 sequences were used to infer phylogenetic relationships of *SET* genes across insects.

Evolution of *SET* Genes in Insects

1  
2  
3  
4  
5  
6  
7  
8  
9  
10  
11  
12  
13  
14  
15  
16  
17  
18  
19  
20  
21  
22  
23  
24  
25  
26  
27  
28  
29  
30  
31  
32  
33  
34  
35  
36  
37  
38  
39  
40  
41  
42  
43  
44  
45  
46  
47  
48  
49  
50  
51  
52  
53  
54  
55  
56  
57  
58  
59  
60  
61  
62  
63  
64  
65

524 Multiple alignments were generated using the MAFFT alignment software [46].  
525 According to the Akaike information criterion, the model of molecular evolution with  
526 the best fit to the data was determined by using the ProtTest 3.4.2 software [47].  
527 Bayesian reconstruction of phylogeny was conducted using the MrBayes 3.2.1  
528 software for 10,000,000 generations [48]. The first 25% of the trees were discarded as  
529 burn-in. The alignment-free and distance-based methods for phylogenetic tree  
530 building were implemented by means of the feature frequency profile method with the  
531 FFP version 3.19 suite (<http://sourceforge.net/projects/ffp-phylogeny/>), utilizing the  
532 FFPaa program for amino acid sequences with a word length of  $L = 5$ . The FFPboot  
533 program was used for bootstrap analysis of the tree generated for 100 replicates.

534 We constructed a character matrix that represents present/absent states for each  
535 *SET* homologous group to reconstruct the ancestral states of interior clades. We did  
536 not consider member number variation and considered only the binary state, presence  
537 or absence, of a given *SET* homologous group in any given node. The grouping of the  
538 *SET* genes was inferred from the OrthoMCL software with the corresponding  
539 orthologous *SET* gene in *D. melanogaster*. Ancestral state reconstruction was  
540 implemented in the Mesquite program (<http://mesquiteproject.org/>) under maximum  
541 likelihood optimization using Markov k-state 1 parameter model. After ancestral  
542 reconstruction, we measured emergence and loss events of *SET* homologous group  
543 along each branch in the phylogenetic tree. The emergence event of *SET* homologous  
544 group was defined as the *SET* homologous group was absent at the ancestral nodes of  
545 a given node and either of the outgroups This process requires a phylogeny tree of all  
546 the species studied. Single-copy orthologous gene families were inferred from the  
547 benchmarking universal single-copy ortholog BUSCO gene sets from each species

Evolution of *SET* Genes in Insects

1  
2  
3  
4  
5  
6  
7  
8  
9  
10  
11  
12  
13  
14  
15  
16  
17  
18  
19  
20  
21  
22  
23  
24  
25  
26  
27  
28  
29  
30  
31  
32  
33  
34  
35  
36  
37  
38  
39  
40  
41  
42  
43  
44  
45  
46  
47  
48  
49  
50  
51  
52  
53  
54  
55  
56  
57  
58  
59  
60  
61  
62  
63  
64  
65

548 [49]. The resulting 527 single-copy orthologous (completed genes in BUSCO) gene  
549 families were used to construct the neighbor-joining species tree, which is consistent  
550 with the phylogenomic tree recently inferred from transcriptome data [14]. The  
551 neighbor-joining species tree was constructed from amino acid sequences of  
552 single-copy orthologs using Phylip version 3.69 package. The bootstrap values,  
553 calculated from 100 replicates using the seqboot, protdist, neighbor and consense  
554 programs of Phylip package.

### 556 **Expression of SMYD family genes in response to phenotypic plasticity**

557 The transcriptome data for gregarious and solitary locusts in *L. migratoria*, asexual  
558 and sexual morphs in *A. pisum*, queens and workers in *A. mellifera*, and minor and  
559 major workers in *A. echinator* were retrieved from the NCBI database under  
560 accession numbers PRJNA79681, GSE56830, GSE61253, and GSE51576,  
561 respectively. The raw reads were preprocessed to remove adapters and low-quality  
562 bases using the Trimmomatic software; these reads were then mapped to the genome  
563 assembly (genome assembly version: v2.4 for *L. migratoria*, v1.0 for *A. pisum*,  
564 Amel\_2.0 for *A. mellifera* and Aech\_v2.0 for *A. echinator*, respectively) using the  
565 Tophat2 version 2.0.14 software [50, 51]. Raw counts of each gene were calculated  
566 and annotated using the HT-seq version 0.6.1 package in Python, and the trimmed  
567 mean of M value normalization method was used to normalize raw counts [52].  
568 Differential expression analysis was performed using the edgeR version 3.8.0 package  
569 at an FDR cut-off of 0.05 [53].

570

Evolution of *SET* Genes in Insects



**571 Function approval of *SmydA-2* genes via experimental evidence**

1  
2 572 Fluorescence *in situ* analysis of *SmydA-2* was performed on the brains and  
3  
4  
5 573 integuments of locust nymphs. Biotin-labeled antisense and sense probes  
6  
7 574 (Supplementary Table S4) of *SmydA-2* were produced from pGEM-T Easy plasmids  
8  
9 575 (Promega) by using the T7/SP6 RNA transcription system (Roche) following the  
10  
11 576 manufacturer's protocol. The PCR parameters were a preincubation 94 °C for 5 min,  
12  
13 577 followed by 30 cycles of 94 °C for 10 sec, 58 °C for 30 sec, 72 °C for 30 sec, and a  
14  
15 578 final extension at 72 °C for 10min. The brains and integuments were fixed in 4%  
16  
17 579 paraformaldehyde overnight. The paraffin-embedded slides (5 µm thick) were  
18  
19 580 deparaffinized in xylene, rehydrated with an ethanol gradient, digested with 20 µg/mL  
20  
21 581 proteinase K (Roche) at 37 °C for 15 min, and then incubated with *SmydA-2* probe at  
22  
23 582 60 °C for 5 min. The slides were hybridized for 7–15 h at 37 °C and washed in  
24  
25 583 0.2×SSC and 2% BSA at 4 °C for 5 min. The biotin-labeled probes of *SmydA-2* were  
26  
27 584 detected with a streptavidin horseradish peroxidase conjugate and fluorescein  
28  
29 585 tyramide substrate using a TSA kit (Perkin Elmer). Images for fluorescence signals  
30  
31 586 were acquired using an LSM 710 confocal fluorescence microscope (Zeiss).

32  
33  
34  
35  
36  
37  
38  
39 587 The recombinant proteins for *SmydA-2* and the negative controls of translation  
40  
41 588 system were produced using the TNT protein expression system (Promega) following  
42  
43 589 the manufacturer's protocol. In brief, 3 µg PCR-generated DNA templates  
44  
45 590 (Supplementary Table S4) were added to 30 µl TNT master mix, and the translation  
46  
47 591 reactions were incubated at 25 °C for 2 h. The recombinant proteins were verified by  
48  
49 592 Western blotting using His-tag antibodies. For *in vitro* methyltransferase assay, 2 mg  
50  
51 593 of unmodified histone H3 peptides (Sino Biological) were incubated with 1 mg of  
52  
53 594 recombinant protein and 0.1 mM S-adenosyl-methionine (SAM, NEB) in a reaction

1  
2  
3  
4  
5  
6  
7  
8  
9  
10  
11  
12  
13  
14  
15  
16  
17  
18  
19  
20  
21  
22  
23  
24  
25  
26  
27  
28  
29  
30  
31  
32  
33  
34  
35  
36  
37  
38  
39  
40  
41  
42  
43  
44  
45  
46  
47  
48  
49  
50  
51  
52  
53  
54  
55  
56  
57  
58  
59  
60  
61  
62  
63  
64  
65

595 buffer containing 50 mM Tris-HCl (pH 8.0), 10% glycerol, 20 mM KCl, 5 mM MgCl<sub>2</sub>,  
596 1 mM DTT, and 1 mM PMSF at 30 °C for 2 h. The reaction mixtures were subjected  
597 to electrophoresis on SDS-PAGE, and the methylation activities were detected in  
598 Western blotting using anti-pan methyl lysine antibody (Abcam Cat# ab7315,  
599 RRID:AB\_305840). Anti-histone H3 (Abcam Cat# ab176877, RRID:AB\_2637011)  
600 was used as endogenous control for protein samples.

601 Locusts (the migratory locust, *Locusta migratoria*) were reared in large,  
602 well-ventilated cages (40 cm × 40 cm × 40 cm) at a density of 500–1000 insects per  
603 container. These colonies were reared under a 14:10 light/dark photo regime at 30 °C  
604 and were fed fresh wheat seedlings and bran. Double-stranded RNAs of *SmydA-2* and  
605 green fluorescent protein (GFP) were prepared using the T7 RiboMAX Express RNAi  
606 system (Promega) in accordance with the manufacturer's protocols. Second-instar  
607 locusts were injected with double-stranded RNAs in the second ventral segment of the  
608 abdomen. Total RNAs were isolated using TRIzol reagent (Thermo Fisher Scientific)  
609 and then reverse-transcribed into cDNA using M-MLV reverse transcriptase  
610 (Promega). The mRNA levels were quantified using the SYBR Green expression  
611 assays on a LightCycler 480 instrument (Roche). The parameters were a  
612 pre-incubation 95°C for 10 min, followed by 45 cycles of 95 °C for 10 sec, 58 °C for  
613 20 sec, and a single acquisition when 72 °C for 20 sec. The ribosomal protein 49 gene  
614 was used as reference control, and the quantification was based on the requirement of  
615 PCR cycle number to cross or exceed the fluorescence intensity level; the  $2^{-\Delta\Delta Ct}$   
616 method was used to analyze mRNA expression levels. Survival data were analyzed  
617 using the Kaplan–Meier method [54], and survival curves were compared using  
618 log-rank testing for the *dsSmydA-2* and *dsGFP* curves.

Evolution of *SET* Genes in Insects

619

**620 Signature of selection detected through likelihood ratio tests**

621 Protein sequences of *SET* genes were aligned with the MAFFT alignment software  
622 [46] and the back-translated into corresponding nucleotide sequences. Gene  
623 conversion was detected using the recombination detection program GENECONV  
624 version 1.81a. To assess the contribution of natural selection during the diversification  
625 of the *SET* gene family in insects, the ratios of nonsynonymous substitution per  
626 nonsynonymous site ( $d_N$ ) to synonymous substitution per synonymous site ( $d_S$ ) across  
627 the phylogenetic tree of the species were calculated using the software package  
628 PAML version 4.48a [55]. The basic model M0 (null model) assumes the ratio  $\omega =$   
629  $d_N/d_S$  is invariable (one-ratio model) among all branches examined, whereas the  
630 alternative model allows the  $\omega$  ratio to vary in different tree branches in the  
631 phylogenetic tree [56, 57]. Likelihood ratio tests were applied to compare the null and  
632 alternative models, which estimated  $\omega$  ratio separately for different branches,  
633 assuming a priori and the background branches. A significantly higher likelihood of  
634 the alternative model than the null model indicates a better fit to the data, indicating a  
635 variation of selective pressures in different tree branches [56, 57].

636

**637 Declarations****638 List of abbreviations**

639 *SET* genes, *SET* domain-containing genes; E(z), Enhancer of zeste; LCA, last  
640 common ancestor; GO, gene ontology; MYND, Myeloid translocation protein; qPCR,

Evolution of *SET* Genes in Insects

1  
2  
3  
4  
5  
6  
7  
8  
9  
10  
11  
12  
13  
14  
15  
16  
17  
18  
19  
20  
21  
22  
23  
24  
25  
26  
27  
28  
29  
30  
31  
32  
33  
34  
35  
36  
37  
38  
39  
40  
41  
42  
43  
44  
45  
46  
47  
48  
49  
50  
51  
52  
53  
54  
55  
56  
57  
58  
59  
60  
61  
62  
63  
64  
65

641 quantitative real-time polymerase chain reaction; DEGs, differentially expressed  
642 genes; FDR, false discovery rate; SAM, S-adenosyl-methionine; GFP, green  
643 fluorescent protein; PP, posterior probability

## 644 **Ethics approval and consent to participate**

645 All animal procedures were licensed under the Institutional Animal Care and Use  
646 Committee of the Institute of Zoology, Chinese Academy of Sciences.

## 647 **Competing interests**

648 The authors declare they have no competing interests.

## 649 **Funding**

650 This research was supported by the following grants: National Natural Science  
651 Foundation of China Grants (Nos. 31430023, 31672353, 31472047, 31301915 and  
652 31472051). The funders had no role in study design, data collection and analysis,  
653 decision to publish, or preparation of the manuscript.

## 654 **Authors' contributions**

655 F.J., X.W., and L.K conceived and designed the experiments. F.J. and Q. L analyzed  
656 and interpreted the data. F.J., Q. L., Y.W., J.Z., H.W., T.S., and M.Y. performed the  
657 experiments. F.J., Q.L., and L.K wrote the paper.

## 658 Acknowledgements

659 The computational resources were provided by the Research Network of  
 660 Computational Biology and the Supercomputing Center at Beijing Institutes of Life  
 661 Science, Chinese Academy of Sciences.

## 662 Availability of supporting data and materials

663 Snapshots of the dataset supporting the conclusions of this article is available in the  
 664 *GigaScience* GigaDB database [58], as well as from our website which also has a  
 665 BLAST server <http://159.226.67.242:8080>.

## 667 References

- 668 1. Elofsson A, Sonnhammer EL. A comparison of sequence and structure protein  
 669 domain families as a basis for structural genomics. *Bioinformatics*. 1999;  
 670 15(6):480-500.
- 671 2. Itoh M, Nacher JC, Kuma K, Goto S, Kanehisa M. Evolutionary history and  
 672 functional implications of protein domains and their combinations in  
 673 eukaryotes. *Genome Biol*. 2007; 8(6):R121.
- 674 3. Sakarya O, Conaco C, Egecioglu O, Solla SA, Oakley TH, Kosik KS.  
 675 Evolutionary expansion and specialization of the PDZ domains. *Mol Biol*  
 676 *Evol*. 2010; 27(5):1058-1069.
- 677 4. Moore AD, Bornberg-Bauer E. The dynamics and evolutionary potential of  
 678 domain loss and emergence. *Mol Biol Evol*. 2012; 29(2):787-796.
- 679 5. Simola DF, Graham RJ, Brady CM, Enzmann BL, Desplan C, Ray A, Zwiebel  
 680 LJ, Bonasio R, Reinberg D, Liebig J *et al*. Epigenetic (re)programming of  
 681 caste-specific behavior in the ant *Camponotus floridanus*. *Science*. 2016;  
 682 351(6268):aac6633.
- 683 6. Spannhoff A, Kim YK, Raynal NJ, Gharibyan V, Su MB, Zhou YY, Li J,  
 684 Castellano S, Sbardella G, Issa JP *et al*. Histone deacetylase inhibitor activity  
 685 in royal jelly might facilitate caste switching in bees. *EMBO Rep*. 2011;  
 686 12(3):238-243.
- 687 7. Simola DF, Ye C, Mutti NS, Dolezal K, Bonasio R, Liebig J, Reinberg D,  
 688 Berger SL. A chromatin link to caste identity in the carpenter ant *Camponotus*  
 689 *floridanus*. *Genome Res*. 2013; 23(3):486-496.
- 690 8. Dickman MJ, Kucharski R, Maleszka R, Hurd PJ. Extensive histone  
 691 post-translational modification in honey bees. *Insect Biochem Mol Biol*. 2013;  
 692 43(2):125-137.

- 693 9. Jenuwein T, Laible G, Dorn R, Reuter G. SET domain proteins modulate  
694 chromatin domains in eu- and heterochromatin. *Cell Mol Life Sci.* 1998;  
695 54(1):80-93.
- 696 10. Dillon SC, Zhang X, Trievel RC, Cheng X. The SET-domain protein  
697 superfamily: protein lysine methyltransferases. *Genome Biol.* 2005; 6(8):227.
- 698 11. Boros IM. Histone modification in *Drosophila*. *Brief Funct Genomics.* 2012;  
699 11(4):319-331.
- 700 12. Herz HM, Garruss A, Shilatifard A. SET for life: biochemical activities and  
701 biological functions of SET domain-containing proteins. *Trends Biochem Sci.*  
702 2013; 38(12):621-639.
- 703 13. Jenuwein T. The epigenetic magic of histone lysine methylation. *FEBS J.*  
704 2006; 273(14):3121-3135.
- 705 14. Misof B, Liu S, Meusemann K, Peters RS, Donath A, Mayer C, Frandsen PB,  
706 Ware J, Flouri T, Beutel RG *et al.* Phylogenomics resolves the timing and  
707 pattern of insect evolution. *Science.* 2014; 346(6210):763-767.
- 708 15. Ferguson LC, Green J, Surridge A, Jiggins CD. Evolution of the insect yellow  
709 gene family. *Mol Biol Evol.* 2011; 28(1):257-272.
- 710 16. Helmkamp M, Cash E, Gadau J. Evolution of the insect desaturase gene  
711 family with an emphasis on social Hymenoptera. *Mol Biol Evol.* 2015;  
712 32(2):456-471.
- 713 17. Tanaka K, Diekmann Y, Hazbun A, Hijazi A, Vreede B, Roch F, Sucena E.  
714 Multispecies Analysis of Expression Pattern Diversification in the Recently  
715 Expanded Insect Ly6 Gene Family. *Mol Biol Evol.* 2015; 32(7):1730-1747.
- 716 18. Urena E, Pirone L, Chafino S, Perez C, Sutherland JD, Lang V, Rodriguez  
717 MS, Lopitz-Otsoa F, Blanco FJ, Barrio R *et al.* Evolution of SUMO Function  
718 and Chain Formation in Insects. *Mol Biol Evol.* 2016; 33(2):568-584.
- 719 19. Benton R. Multigene Family Evolution: Perspectives from Insect  
720 Chemoreceptors. *Trends Ecol Evol.* 2015; 30(10):590-600.
- 721 20. Zhang L, Ma H. Complex evolutionary history and diverse domain  
722 organization of SET proteins suggest divergent regulatory interactions. *The*  
723 *New phytologist.* 2012; 195(1):248-263.
- 724 21. Vidal NM, Grazziotin AL, Iyer LM, Aravind L, Venancio TM. Transcription  
725 factors, chromatin proteins and the diversification of Hemiptera. *Insect*  
726 *Biochem Mol Biol.* 2016; 69:1-13.
- 727 22. Rider SD, Jr., Srinivasan DG, Hilgarth RS. Chromatin-remodelling proteins of  
728 the pea aphid, *Acyrtosiphon pisum* (Harris). *Insect Mol Biol.* 2010; 19 Suppl  
729 2:201-214.
- 730 23. Bonasio R, Zhang G, Ye C, Mutti NS, Fang X, Qin N, Donahue G, Yang P, Li  
731 Q, Li C *et al.* Genomic comparison of the ants *Camponotus floridanus* and  
732 *Harpegnathos saltator*. *Science.* 2010; 329(5995):1068-1071.
- 733 24. Calpena E, Palau F, Espinos C, Galindo MI. Evolutionary History of the Smyd  
734 Gene Family in Metazoans: A Framework to Identify the Orthologs of Human  
735 Smyd Genes in *Drosophila* and Other Animal Species. *PLoS One.* 2015;  
736 10(7):e0134106.
- 737 25. Wang X, Fang X, Yang P, Jiang X, Jiang F, Zhao D, Li B, Cui F, Wei J, Ma C  
738 *et al.* The locust genome provides insight into swarm formation and  
739 long-distance flight. *Nat Commun.* 2014; 5:2957.

Evolution of *SET* Genes in Insects

- 1 740 26. Thompson EC, Travers AA. A *Drosophila* Smyd4 homologue is a  
2 741 muscle-specific transcriptional modulator involved in development. *PLoS*  
3 742 *One*. 2008; 3(8):e3008.
- 4 743 27. Kaessmann H. Origins, evolution, and phenotypic impact of new genes.  
5 744 *Genome Res*. 2010; 20(10):1313-1326.
- 6 745 28. Assis R, Bachtrog D. Neofunctionalization of young duplicate genes in  
7 746 *Drosophila*. *Proc Natl Acad Sci U S A*. 2013; 110(43):17409-17414.
- 8 747 29. Krylov DM, Wolf YI, Rogozin IB, Koonin EV. Gene loss, protein sequence  
9 748 divergence, gene dispensability, expression level, and interactivity are  
10 749 correlated in eukaryotic evolution. *Genome research*. 2003; 13(10):2229-2235.
- 11 750 30. Kemkemer C, Long M. New genes important for development. *EMBO Rep*.  
12 751 2014; 15(5):460-461.
- 13 752 31. Kenny NJ, Chan KW, Nong W, Qu Z, Maeso I, Yip HY, Chan TF, Kwan HS,  
14 753 Holland PW, Chu KH *et al*. Ancestral whole-genome duplication in the  
15 754 marine chelicerate horseshoe crabs. *Heredity (Edinb)*. 2016; 116(2):190-199.
- 16 755 32. Kaessmann H, Vinckenbosch N, Long M. RNA-based gene duplication:  
17 756 mechanistic and evolutionary insights. *Nat Rev Genet*. 2009; 10(1):19-31.
- 18 757 33. Hedges SB, Dudley J, Kumar S. TimeTree: a public knowledge-base of  
19 758 divergence times among organisms. *Bioinformatics*. 2006; 22(23):2971-2972.
- 20 759 34. Tan X, Rotllant J, Li H, De Deyne P, Du SJ. SmyD1, a histone  
21 760 methyltransferase, is required for myofibril organization and muscle  
22 761 contraction in zebrafish embryos. *Proc Natl Acad Sci U S A*. 2006;  
23 762 103(8):2713-2718.
- 24 763 35. Domazet-Loso T, Tautz D. An evolutionary analysis of orphan genes in  
25 764 *Drosophila*. *Genome Res*. 2003; 13(10):2213-2219.
- 26 765 36. Innan H, Kondrashov F. The evolution of gene duplications: classifying and  
27 766 distinguishing between models. *Nat Rev Genet*. 2010; 11(2):97-108.
- 28 767 37. Pegueroles C, Laurie S, Alba MM. Accelerated evolution after gene  
29 768 duplication: a time-dependent process affecting just one copy. *Mol Biol Evol*.  
30 769 2013; 30(8):1830-1842.
- 31 770 38. Bonasio R. The role of chromatin and epigenetics in the polyphenisms of ant  
32 771 castes. *Brief Funct Genomics*. 2014; 13(3):235-245.
- 33 772 39. Leinhart K, Brown M. SET/MYND Lysine Methyltransferases Regulate Gene  
34 773 Transcription and Protein Activity. *Genes (Basel)*. 2011; 2(1):210-218.
- 35 774 40. Sims RJ, 3rd, Nishioka K, Reinberg D. Histone lysine methylation: a signature  
36 775 for chromatin function. *Trends Genet*. 2003; 19(11):629-639.
- 37 776 41. Finn RD, Mistry J, Tate J, Cogill P, Heger A, Pollington JE, Gavin OL,  
38 777 Gunasekaran P, Ceric G, Forslund K *et al*. The Pfam protein families database.  
39 778 *Nucleic Acids Res*. 2010; 38(Database issue):D211-222.
- 40 779 42. Finn RD, Clements J, Eddy SR. HMMER web server: interactive sequence  
41 780 similarity searching. *Nucleic Acids Res*. 2011; 39(Web Server issue):W29-37.
- 42 781 43. Birney E, Clamp M, Durbin R. GeneWise and Genomewise. *Genome Res*.  
43 782 2004; 14(5):988-995.
- 44 783 44. Coin L, Durbin R. Improved techniques for the identification of pseudogenes.  
45 784 *Bioinformatics*. 2004; 20 Suppl 1:i94-100.
- 46 785 45. Jones P, Binns D, Chang HY, Fraser M, Li W, McAnulla C, McWilliam H,  
47 786 Maslen J, Mitchell A, Nuka G *et al*. InterProScan 5: genome-scale protein  
48 787 function classification. *Bioinformatics*. 2014; 30(9):1236-1240.

58 Evolution of *SET* Genes in Insects  
59  
60  
61  
62  
63  
64  
65

- 788 46. Katoh K, Asimenos G, Toh H. Multiple alignment of DNA sequences with  
789 MAFFT. *Methods Mol Biol.* 2009; 537:39-64.
- 790 47. Darriba D, Taboada GL, Doallo R, Posada D. ProtTest 3: fast selection of  
791 best-fit models of protein evolution. *Bioinformatics.* 2011; 27(8):1164-1165.
- 792 48. Ronquist F, Teslenko M, van der Mark P, Ayres DL, Darling A, Hohna S,  
793 Larget B, Liu L, Suchard MA, Huelsenbeck JP. MrBayes 3.2: efficient  
794 Bayesian phylogenetic inference and model choice across a large model space.  
795 *Syst Biol.* 2012; 61(3):539-542.
- 796 49. Simao FA, Waterhouse RM, Ioannidis P, Kriventseva EV, Zdobnov EM.  
797 BUSCO: assessing genome assembly and annotation completeness with  
798 single-copy orthologs. *Bioinformatics.* 2015; 31(19):3210-3212.
- 799 50. Bolger AM, Lohse M, Usadel B. Trimmomatic: a flexible trimmer for  
800 Illumina sequence data. *Bioinformatics.* 2014; 30(15):2114-2120.
- 801 51. Trapnell C, Pachter L, Salzberg SL. TopHat: discovering splice junctions with  
802 RNA-Seq. *Bioinformatics.* 2009; 25(9):1105-1111.
- 803 52. Robinson MD, Oshlack A. A scaling normalization method for differential  
804 expression analysis of RNA-seq data. *Genome Biol.* 2010; 11(3):R25.
- 805 53. Robinson MD, McCarthy DJ, Smyth GK. edgeR: a Bioconductor package for  
806 differential expression analysis of digital gene expression data.  
807 *Bioinformatics.* 2010; 26(1):139-140.
- 808 54. Kaplan EL, Meier P. Nonparametric-Estimation from Incomplete  
809 Observations. *J Am Stat Assoc.* 1958; 53(282):457-481.
- 810 55. Yang Z. PAML 4: phylogenetic analysis by maximum likelihood. *Mol Biol*  
811 *Evol.* 2007; 24(8):1586-1591.
- 812 56. Yang Z. Likelihood ratio tests for detecting positive selection and application  
813 to primate lysozyme evolution. *Mol Biol Evol.* 1998; 15(5):568-573.
- 814 57. Yang Z, Nielsen R. Synonymous and nonsynonymous rate variation in nuclear  
815 genes of mammals. *J Mol Evol.* 1998; 46(4):409-418.
- 816 58. Jiang F, Liu Q, Wang Y, Zhang J, Wang H, Song T, Yang M, Wang X, Kang  
817 L. Supporting data for “Comparative genomic analysis of SET-domain family  
818 reveals the origin, expansion, and putative function of the arthropod-specific  
819 SmydA genes as histone modifiers in insects”. *GigaScience Database.*  
820 2017.[<http://dx.doi.org/10.5524/100299>]  
821  
822

## 823 **Figures**

824 **Figure 1. Phylogenetic analysis of *SET* genes in insects.** A phylogeny using  
825 Bayesian inference is generated from the domain protein sequence of *SET* genes. One  
826 representative is elected for each order. The protein domains, which are labeled with  
827 different colors based on the domain type, are shown in the exterior circle of the  
828 phylogenetic tree. The length of the grey long line after each terminal is directly  
Evolution of *SET* Genes in Insects



829 proportional to the length of the corresponding *SET* gene. The branch colors of the  
 830 phylogenetic trees indicate the established *SET* gene classification which divides *SET*  
 831 genes into seven major conserved groups, namely: Suv, Ash, Trx, E(z), PRDM,  
 832 SMYD, and SETD. The *SET* genes labeled in black branches cannot be classified into  
 833 the seven major conserved groups, suggesting their arthropod origin. The  
 834 representative species include *Apis mellifera*, *Daphnia pule*, *Drosophila*  
 835 *melanogaster*, *Ixodes scapularis*, *Locusta migratoria*, *Pediculus humanus*, *Plutella*  
 836 *xylostella*, *Rhodnius prolixus*, *Tetranychus urticae*, *Timema cristinae* and *Tribolium*  
 837 *castaneum*.

838  
 839 **Figure 2. Diversification of arthropod-specific *SET* genes.** (A) Distribution pattern  
 840 of *SET* genes in arthropod orders. One representative is elected for each order. Red  
 841 color indicates presence of *SET* genes, and blue color indicates absence of *SET* genes.  
 842 (B) Inference of ancestral sets of *SET* homologous groups along the evolution of  
 843 insects. The gains and losses of *SET* homologous groups are indicated in the internal  
 844 nodes of the phylogenetic tree. The number in parentheses indicates the number of  
 845 species in each order. The bars indicate the number ranges of *SET* homologous groups  
 846 in each order.

847  
 848 **Figure 3. Evolution of *SmydA* genes in insects.** (A) Gene ontology categories of the  
 849 conserved and arthropod-specific groups of *SET* genes. The gene ontology categories,  
 850 which are only present in the arthropod-specific group, are highlighted in red. (B)  
 851 Phylogenetic tree of the SMYD gene family of the representative species selected  
 852 from each order. The representative species include *Apis mellifera*, *Daphnia pule*,

Evolution of *SET* Genes in Insects

853 *Drosophila melanogaster*, *Ixodes scapularis*, *Locusta migratoria*, *Pediculus humanus*,  
 854 *Plutella xylostella*, *Rhodnius prolixus*, *Tetranychus urticae*, *Timema cristinae* and  
 855 *Tribolium castaneum*. The phylogenetic tree is constructed using the Bayesian  
 856 inference method. The Bayesian posterior probability (PP) values are indicated only  
 857 for the internal nodes to improve clarity; consequently, the *SET* genes are grouped  
 858 into different monophyletic clades (SMYD subfamilies). Red and orange circles  
 859 indicate PP > 90% and PP > 70%, respectively. (C) Conserved synteny for *SmydA*  
 860 genes in four holometabolous species. Shown from top to bottom are *Drosophila*  
 861 *melanogaster*, *Anopheles gambiae*, *Tribolium castaneum* and *Apis mellifera*. (D)  
 862 Distributions of  $\omega$  ( $\omega = d_N/d_S$  ratio) values of the conserved SMYD and *SmydA* groups  
 863 of *SET* genes.

864  
 865 **Figure 4. Function approval of *SmydA-2* genes through experimental evidence.**

866 (A) *In vitro* methyltransferase assay of histone H3 of *SmydA-2* in locusts. Anti-pan  
 867 methyl lysine antibody recognizes histone H3 *in vitro* methylated with *SmydA-2*.  
 868 Anti-histone H3 serves as endogenous control for protein samples. The analyses were  
 869 carried out in three replicates. **\*\* $P < 0.01$** . (B) Expression evidence of *SmydA-2* in the  
 870 brain and cuticle of locusts via fluorescence *in situ* hybridization analysis. Green  
 871 signals indicate the expression of *SmydA-2* /control, and blue signals indicate nuclear  
 872 staining with Hoechst. (C) Relative gene expression of *SmydA-2* in the different  
 873 tissues. mRNA levels are quantified using the SYBR Green expression assays on a  
 874 LightCycler 480 instrument. The qPCR data are shown as the mean  $\pm$  SEM ( $n = 6$ ).  
 875 (D) Survival analysis of the locusts after *SmydA-2* double-strand RNA injection. Data

1  
2  
3  
4  
5  
6  
7  
8  
9  
10  
11  
12  
13  
14  
15  
16  
17  
18  
19  
20  
21  
22  
23  
24  
25  
26  
27  
28  
29  
30  
31  
32  
33  
34  
35  
36  
37  
38  
39  
40  
41  
42  
43  
44  
45  
46  
47  
48  
49  
50  
51  
52  
53  
54  
55  
56  
57  
58  
59  
60  
61  
62  
63  
64  
65

876 are analyzed through the Kaplan–Meier survival curve comparison of the *dsSmydA-2*  
877 and *dsGFP* groups for three replicates.

878

879 **Figure 5. Differential expression analysis in insects showing phenotype plasticity.**

880 Alternative phenotype includes gregarious and solitary phases in *Locusta migratoria*  
881 (LOCMI), asexual and sexual morphs in *Acyrtosiphon pisum* (ACYPI), queens and  
882 workers in *Apis mellifera* (APIME), and large workers and queens in *Acromyrmex*  
883 *echinator* (ACREC).

884

## 885 **Tables**

886 **Table 1. Summary of *SET* genes in insect genomes.**

887 **Table 2. Tests of rate heterogeneity acting on *SET* genes in insects.**

888 **Table 3. Signatures of selection acting on differentially expressed *SET* genes in**  
889 **response to phenotypic plasticity.**

890

## 891 **Supplementary Data**

892 **Supplementary Table S1. The arthropod genome data involved in this study.**

893 **Supplementary Table S2. *SET* genes in the 147 arthropod genomes.**

894 **Supplementary Table S3. Summary of *SET* genes in the 147 arthropod genomes.**

895 **Supplementary Table S4. Primers used in the study.**

896 **Supplementary Figure S1. Phylogenetic analysis of the *SET* genes in Lepidoptera**  
897 **using Maximum-likelihood inferences with PhyML. The *SET* gene families labeled**

Evolution of *SET* Genes in Insects

1  
2  
3  
4  
5  
6  
7  
8  
9  
10  
11  
12  
13  
14  
15  
16  
17  
18  
19  
20  
21  
22  
23  
24  
25  
26  
27  
28  
29  
30  
31  
32  
33  
34  
35  
36  
37  
38  
39  
40  
41  
42  
43  
44  
45  
46  
47  
48  
49  
50  
51  
52  
53  
54  
55  
56  
57  
58  
59  
60  
61  
62  
63  
64  
65

898 with different colors are shown in the exterior circle of the phylogenetic tree. The  
899 insect species involved are represented with different colors of the external branch.

900 **Supplementary Figure S2. Phylogenetic analysis of the *SET* genes in Diptera**

901 **using Maximum-likelihood inferences with PhyML.** The *SET* gene families labeled  
902 with different colors are shown in the exterior circle of the phylogenetic tree. The  
903 insect species involved are represented with different colors of the external branch.  
904 The representative species are selected to improve clarity.

905 **Supplementary Figure S3. Phylogenetic analysis of the *SET* genes in Hemiptera**

906 **using Maximum-likelihood inferences with PhyML.** The *SET* gene families labeled  
907 with different colors are shown in the exterior circle of the phylogenetic tree. The  
908 insect species involved are represented with different colors of the external branch.

909 **Supplementary Figure S4. Phylogenetic analysis of the *SET* genes in**

910 **Hymenoptera using Maximum-likelihood inferences with PhyML.** The *SET* gene  
911 families labeled with different colors are shown in the exterior circle of the  
912 phylogenetic tree. The insect species involved are represented with different colors of  
913 the external branch. The representative species are selected to improve clarity.

914 **Supplementary Figure S5. Phylogenetic analysis of the *SET* genes in Coleopteran**

915 **using Maximum-likelihood inferences with PhyML.** The *SET* gene families labeled  
916 with different colors are shown in the exterior circle of the phylogenetic tree. The  
917 insect species involved are represented with different colors of the external branch.

918 **Supplementary Figure S6. Effects of RNA interference of the mRNA expression**

919 **levels of *SmydA-2* in locust brains.** The locusts are injected with double-stranded  
920 RNAs into the second ventral segment of the abdomen. Due to the systemic RNA  
921 interference in locusts, the brain, which is spatially distant from the abdomen, is used

1  
2  
3  
4  
5  
6  
7  
8  
9  
10  
11  
12  
13  
14  
15  
16  
17  
18  
19  
20  
21  
22  
23  
24  
25  
26  
27  
28  
29  
30  
31  
32  
33  
34  
35  
36  
37  
38  
39  
40  
41  
42  
43  
44  
45  
46  
47  
48  
49  
50  
51  
52  
53  
54  
55  
56  
57  
58  
59  
60  
61  
62  
63  
64  
65

922 in qPCR assays to guarantee effective expression knockdown. qPCR data are shown  
923 as the mean  $\pm$  SEM (n = 6). \*\*P < 0.01.

924 **Supplementary Figure S7. Tree topology and branch labeling for tests of**  
925 **selection on *SET* genes.** APIME, *Apis mellifera*; ACREC, *Acromyrmex echinator*;  
926 LOCMI, *Locusta migratoria*. Supplementary Table S1 presents the abbreviation of  
927 insect species.

928

Table 1. Summary of *SET* genes in insect genomes.

| Order         | Genus                    | SMYD  | SETD | PRDM | Ash | Suv | Trx | Ez  | Other | Total |
|---------------|--------------------------|-------|------|------|-----|-----|-----|-----|-------|-------|
| Coleoptera    | <i>Agrilus</i> (1)       | 4     | 1    | 2    | 3   | 3   | 3   | 1   | 9     | 26    |
| Coleoptera    | <i>Anoplophora</i> (1)   | 7     | 1    | 2    | 3   | 3   | 3   | 2   | 7     | 28    |
| Coleoptera    | <i>Dendroctonus</i> (1)  | 5     | 1    | 1    | 3   | 3   | 3   | 1   | 12    | 29    |
| Coleoptera    | <i>Leptinotarsa</i> (1)  | 10    | 1    | 1    | 2   | 5   | 3   | 1   | 9     | 32    |
| Coleoptera    | <i>Onthophagus</i> (1)   | 4     | 1    | 1    | 3   | 4   | 3   | 1   | 10    | 27    |
| Coleoptera    | <i>Oryctes</i> (1)       | 6     | 1    | 1    | 3   | 3   | 1   | 1   | 9     | 25    |
| Coleoptera    | <i>Tribolium</i> (1)     | 6     | 2    | 1    | 3   | 3   | 3   | 1   | 15    | 34    |
| Phthiraptera  | <i>Pediculus</i> (1)     | 6     | 1    | 1    | 3   | 4   | 3   | 1   | 9     | 28    |
| Blattodea     | <i>Blattella</i> (1)     | 4     | 2    | 2    | 4   | 3   | 2   | 1   | 7     | 25    |
| Diptera       | <i>Aedes</i> (2)         | 11-12 | 1    | 2    | 3-4 | 2-3 | 3-4 | 1-2 | 11-12 | 34-38 |
| Diptera       | <i>Anopheles</i> (19)    | 6-19  | 1    | 1-2  | 1-3 | 2-3 | 2-3 | 1   | 4-11  | 20-37 |
| Diptera       | <i>Bactrocera</i> (2)    | 4-5   | 1    | 1-2  | 3-4 | 4   | 3-6 | 1-2 | 13-22 | 31-45 |
| Diptera       | <i>Ceratina</i> (1)      | 5     | 1    | 1    | 2   | 4   | 3   | 1   | 11    | 28    |
| Diptera       | <i>Ceratitis</i> (1)     | 5     | 1    | 1    | 3   | 3   | 3   | 1   | 14    | 31    |
| Diptera       | <i>Culex</i> (1)         | 40    | 1    | 1    | 13  | 2   | 9   | 1   | 14    | 81    |
| Diptera       | <i>Drosophila</i> (22)   | 4-5   | 1    | 1    | 3-4 | 3-5 | 2-4 | 1   | 7-14  | 24-31 |
| Diptera       | <i>Glossina</i> (6)      | 4-5   | 1    | 1    | 3-4 | 2-5 | 3-4 | 1   | 12-15 | 29-34 |
| Diptera       | <i>Lucilia</i> (1)       | 5     | 1    | 1    | 3   | 3   | 3   | 1   | 12    | 29    |
| Diptera       | <i>Lutzomyia</i> (1)     | 6     | 1    | 1    | 3   | 3   | 2   | 1   | 10    | 27    |
| Diptera       | <i>Mayetiola</i> (1)     | 13    | 1    | 1    | 9   | 6   | 4   | 1   | 25    | 60    |
| Diptera       | <i>Megaselia</i> (1)     | 2     | 1    | 1    | 3   | 2   | 1   | 1   | 5     | 16    |
| Diptera       | <i>Musca</i> (1)         | 5     | 1    | 1    | 3   | 3   | 3   | 1   | 20    | 37    |
| Diptera       | <i>Phlebotomus</i> (1)   | 5     | 1    | 1    | 4   | 3   | 3   | 1   | 6     | 24    |
| Diptera       | <i>Belgica</i> (1)       | 27    | 2    | 1    | 3   | 5   | 4   | 1   | 12    | 55    |
| Diptera       | <i>Stomoxys</i> (1)      | 5     | 1    | 1    | 3   | 2   | 3   | 1   | 16    | 32    |
| Ephemeroptera | <i>Ephemer</i> (1)       | 18    | 1    | 1    | 3   | 2   | 2   | 1   | 12    | 40    |
| Hemiptera     | <i>Acyrtosiphon</i> (1)  | 14    | 1    | 0    | 2   | 10  | 4   | 1   | 31    | 63    |
| Hemiptera     | <i>Cimex</i> (1)         | 4     | 1    | 2    | 3   | 5   | 3   | 1   | 5     | 24    |
| Hemiptera     | <i>Diaphorina</i> (1)    | 3     | 1    | 1    | 4   | 4   | 3   | 2   | 11    | 29    |
| Hemiptera     | <i>Gerris</i> (1)        | 6     | 1    | 1    | 3   | 3   | 3   | 1   | 8     | 26    |
| Hemiptera     | <i>Halyomorpha</i> (1)   | 5     | 1    | 1    | 2   | 5   | 3   | 1   | 8     | 26    |
| Hemiptera     | <i>Homalodisca</i> (1)   | 5     | 2    | 2    | 2   | 5   | 4   | 1   | 8     | 29    |
| Hemiptera     | <i>Nilaparvata</i> (1)   | 4     | 1    | 6    | 2   | 4   | 4   | 1   | 7     | 29    |
| Hemiptera     | <i>Oncopeltus</i> (1)    | 6     | 1    | 1    | 2   | 5   | 4   | 1   | 7     | 27    |
| Hemiptera     | <i>Pachypsylla</i> (1)   | 1     | 1    | 2    | 2   | 3   | 1   | 1   | 9     | 20    |
| Hemiptera     | <i>Rhodnius</i> (1)      | 6     | 1    | 1    | 2   | 2   | 2   | 1   | 6     | 21    |
| Hymenoptera   | <i>Acromyrmex</i> (1)    | 7     | 2    | 1    | 3   | 3   | 3   | 1   | 7     | 27    |
| Hymenoptera   | <i>Apis</i> (3)          | 6-7   | 1    | 1    | 3   | 3-4 | 1-3 | 1   | 7-9   | 22-29 |
| Hymenoptera   | <i>Athalia</i> (1)       | 7     | 1    | 2    | 2   | 3   | 2   | 1   | 8     | 26    |
| Hymenoptera   | <i>Atta</i> (1)          | 8     | 1    | 1    | 3   | 4   | 3   | 1   | 7     | 28    |
| Hymenoptera   | <i>Bombus</i> (2)        | 7-8   | 1    | 1    | 3   | 4   | 3   | 1   | 8-10  | 29-30 |
| Hymenoptera   | <i>Camponotus</i> (1)    | 8     | 2    | 1    | 2   | 3   | 2   | 1   | 8     | 27    |
| Hymenoptera   | <i>Cardiocondyla</i> (1) | 7     | 2    | 1    | 3   | 4   | 3   | 1   | 10    | 31    |
| Hymenoptera   | <i>Cephus</i> (1)        | 6     | 1    | 1    | 2   | 3   | 2   | 1   | 6     | 22    |
| Hymenoptera   | <i>Cerapachys</i> (1)    | 5     | 1    | 1    | 2   | 3   | 3   | 1   | 6     | 22    |
| Hymenoptera   | <i>Ceratosolen</i> (1)   | 8     | 1    | 1    | 3   | 3   | 2   | 1   | 9     | 28    |
| Hymenoptera   | <i>Copidosoma</i> (1)    | 17    | 1    | 1    | 3   | 4   | 2   | 1   | 16    | 45    |
| Hymenoptera   | <i>Dufourea</i> (1)      | 7     | 2    | 1    | 3   | 4   | 3   | 1   | 7     | 28    |

|               |                          |    |   |   |   |     |   |   |      |       |
|---------------|--------------------------|----|---|---|---|-----|---|---|------|-------|
| Hymenoptera   | <i>Eufriesea</i> (1)     | 6  | 2 | 1 | 3 | 4   | 3 | 1 | 8    | 28    |
| Hymenoptera   | <i>Fopius</i> (1)        | 9  | 1 | 1 | 3 | 4   | 1 | 1 | 9    | 29    |
| Hymenoptera   | <i>Habropoda</i> (1)     | 8  | 2 | 1 | 3 | 4   | 3 | 1 | 8    | 30    |
| Hymenoptera   | <i>Harpegnathos</i> (1)  | 8  | 2 | 0 | 1 | 2   | 1 | 1 | 8    | 23    |
| Hymenoptera   | <i>Linepithema</i> (1)   | 7  | 2 | 1 | 3 | 4   | 3 | 1 | 8    | 29    |
| Hymenoptera   | <i>Megachile</i> (1)     | 7  | 2 | 1 | 3 | 3   | 3 | 1 | 8    | 28    |
| Hymenoptera   | <i>Melipona</i> (1)      | 7  | 2 | 1 | 3 | 4   | 3 | 1 | 8    | 29    |
| Hymenoptera   | <i>Microplitis</i> (1)   | 18 | 1 | 1 | 3 | 4   | 3 | 2 | 8    | 40    |
| Hymenoptera   | <i>Monomorium</i> (1)    | 6  | 1 | 1 | 2 | 3   | 2 | 1 | 5    | 21    |
| Hymenoptera   | <i>Nasonia</i> (1)       | 17 | 1 | 1 | 3 | 4   | 2 | 1 | 23   | 52    |
| Hymenoptera   | <i>Orussus</i> (1)       | 11 | 2 | 1 | 2 | 3   | 3 | 1 | 7    | 30    |
| Hymenoptera   | <i>Pogonomyrmex</i> (1)  | 5  | 2 | 1 | 2 | 4   | 3 | 1 | 8    | 26    |
| Hymenoptera   | <i>Polistes</i> (1)      | 6  | 1 | 1 | 1 | 4   | 2 | 1 | 6    | 22    |
| Hymenoptera   | <i>Solenopsis</i> (1)    | 2  | 1 | 1 | 3 | 3   | 3 | 1 | 7    | 21    |
| Hymenoptera   | <i>Trichogramma</i> (1)  | 15 | 1 | 1 | 3 | 4   | 1 | 1 | 26   | 52    |
| Hymenoptera   | <i>Vollenhovia</i> (1)   | 6  | 1 | 1 | 3 | 4   | 2 | 1 | 3    | 21    |
| Hymenoptera   | <i>Lasioglossum</i> (1)  | 9  | 1 | 1 | 3 | 3   | 3 | 1 | 8    | 29    |
| Hymenoptera   | <i>Wasmannia</i> (1)     | 7  | 1 | 1 | 3 | 3   | 3 | 1 | 6    | 25    |
| Isoptera      | <i>Zootermopsis</i> (2)  | 6  | 1 | 2 | 2 | 4   | 3 | 1 | 10   | 29    |
| Lepidoptera   | <i>Bombyx</i> (1)        | 4  | 2 | 1 | 3 | 4   | 3 | 1 | 8    | 26    |
| Lepidoptera   | <i>Danaus</i> (1)        | 5  | 1 | 1 | 3 | 5   | 3 | 1 | 10   | 29    |
| Lepidoptera   | <i>Heliconius</i> (1)    | 5  | 1 | 1 | 2 | 4   | 3 | 1 | 6    | 23    |
| Lepidoptera   | <i>Papilio</i> (2)       | 6  | 1 | 1 | 3 | 2-4 | 2 | 1 | 9-11 | 26-27 |
| Lepidoptera   | <i>Lerema</i> (1)        | 4  | 1 | 2 | 3 | 3   | 3 | 1 | 10   | 27    |
| Lepidoptera   | <i>Melitaea</i> (1)      | 5  | 1 | 1 | 3 | 1   | 3 | 1 | 8    | 23    |
| Lepidoptera   | <i>Manduca</i> (1)       | 6  | 2 | 7 | 7 | 5   | 5 | 2 | 29   | 63    |
| Lepidoptera   | <i>Plutella</i> (1)      | 5  | 4 | 1 | 4 | 5   | 6 | 0 | 13   | 38    |
| Odonata       | <i>Ladona</i> (1)        | 3  | 2 | 2 | 3 | 4   | 3 | 1 | 9    | 27    |
| Orthoptera    | <i>Locusta</i> (1)       | 9  | 1 | 1 | 3 | 4   | 3 | 1 | 7    | 29    |
| Phasmatoptera | <i>Timema</i> (1)        | 3  | 1 | 1 | 3 | 5   | 3 | 1 | 6    | 23    |
| Thysanoptera  | <i>Frankliniella</i> (1) | 6  | 2 | 8 | 3 | 5   | 3 | 1 | 21   | 49    |
| Trichoptera   | <i>Limnephilus</i> (1)   | 3  | 1 | 0 | 2 | 3   | 2 | 1 | 6    | 18    |

used to represent the range of *SET* gene number in each genus. The exact gene numbers for different groups in a species are shown in the supplementary Table 3. Other, arthropod-specific and unclassified *SET* genes.

Table 2. Tests of rate heterogeneity acting on *SET* genes in insects.

|       | Gene               | One Ratio Likelihood | One Ratio $\omega$ | Free Ratio Likelihood | df | <i>P</i> |
|-------|--------------------|----------------------|--------------------|-----------------------|----|----------|
|       | <i>Smyd3</i>       | -4833.870633         | 0.055              | -4833.870633          | 16 | <0.001   |
| SMYD  | <i>Smyd4-1</i>     | -17270.85481         | 0.1627             | -17140.2931           | 58 | <0.001   |
|       | <i>Smyd4-2</i>     | -13187.36796         | 0.1125             | -13112.10598          | 44 | <0.001   |
|       | <i>Smyd4-3</i>     | -20488.96316         | 0.1069             | -20364.99139          | 66 | <0.001   |
|       | <i>Smyd4-4</i>     | -15552.36608         | 0.1112             | -15475.97917          | 44 | <0.001   |
|       | <i>Smyd5</i>       | -21495.43548         | 0.0633             | -21329.01303          | 64 | <0.001   |
|       | <i>upSET(MLL5)</i> | -7286.598116         | 0.0103             | -7247.800191          | 62 | 0.087    |
|       | <i>Set8</i>        | -6450.096636         | 0.0321             | -6386.997507          | 60 | <0.001   |
|       | <i>Hmt4-20</i>     | -3523.660744         | 0.0079             | -3478.339497          | 56 | <0.001   |
| SETD  | <i>SETD</i>        | -9030.115692         | 0.033              | -9009.972504          | 34 | 0.212    |
| PRDM  | <i>Blimp-1</i>     | -2679.981724         | 0.0051             | -2664.129882          | 52 | 0.988    |
|       | <i>Mes-4</i>       | -5530.425067         | 0.0163             | -5504.225668          | 56 | 0.612    |
| Ash   | <i>ash1</i>        | -4995.315864         | 0.0122             | -4947.987993          | 60 | <0.001   |
|       | <i>Set2</i>        | -5636.021533         | 0.0118             | -5570.266003          | 60 | <0.001   |
|       | <i>Su(var)3-9</i>  | -4351.473377         | 0.0212             | -4308.872564          | 32 | <0.001   |
| Suv   | <i>egg</i>         | -15308.27271         | 0.0624             | -15214.54477          | 54 | <0.001   |
|       | <i>CG4565</i>      | -7168.675146         | 0.056              | -7114.254055          | 46 | <0.001   |
|       | <i>G9a</i>         | -4641.585219         | 0.0091             | -4604.810574          | 54 | 0.040    |
|       | <i>trx</i>         | -3897.22035          | 0.0031             | -3877.624919          | 58 | 0.972    |
| Trx   | <i>Set1</i>        | -3733.003015         | 0.0026             | -3700.07484           | 60 | 0.281    |
|       | <i>trr</i>         | -4549.712            | 0.0114             | -4471.116449          | 60 | <0.001   |
| E(z)  | <i>Ez</i>          | -3368.302419         | 0.0007             | -3355.922925          | 61 | 1.000    |
|       | <i>SmydA-1</i>     | -10066.85883         | 0.0904             | -9995.276076          | 34 | <0.001   |
|       | <i>SmydA-2</i>     | -11858.79656         | 0.0052             | -11812.61641          | 30 | <0.001   |
|       | <i>SmydA-3</i>     | -13902.68842         | 0.0817             | -13842.81154          | 56 | <0.001   |
| SMYDA | <i>SmydA-4</i>     | -9602.742487         | 0.0254             | -9583.599425          | 26 | 0.057    |
|       | <i>SmydA-5</i>     | -13748.76916         | 0.1179             | -13656.26849          | 50 | <0.001   |
|       | <i>SmydA-6</i>     | -12142.19779         | 0.1623             | -12043.99319          | 42 | <0.001   |
|       | <i>SmydA-9</i>     | -13258.40628         | 0.1357             | -13193.53611          | 52 | <0.001   |



---

Note: Accounting for the unequal genome sequencing efforts between different insect families, we selected one species within each genus to be representative of the genus.

Table 3. Signatures of selection acting on differential expressed *SET* genes in response to phenotypic plasticity.

| Model-Parameters                  | APIME               |                | LOCMI          | ACREC          |                |                |
|-----------------------------------|---------------------|----------------|----------------|----------------|----------------|----------------|
|                                   | <i>SmydA-3</i>      | <i>SmydA-5</i> | <i>SmydA-1</i> | <i>SmydA-3</i> | <i>SmydA-5</i> | <i>SmydA-9</i> |
| <b>Basic models</b>               |                     |                |                |                |                |                |
| M0: $\omega$                      | 0.082               | 0.118          | 0.090          | 0.082          | 0.118          | 0.136          |
| <b>Branch models</b>              |                     |                |                |                |                |                |
| B0: lnL                           | -13914.741          | -13749.007     | -10088.904     | -13905.140     | -13749.047     | -13259.370     |
| B0: $\omega_0$ ( $\omega_1 = 1$ ) | 0.077               | 0.113          | 0.090          | 0.081          | 0.117          | 0.135          |
| BA: lnL                           | -13901.138          | -13745.405     | -10056.182     | -13901.922     | -13748.719     | -13258.338     |
| BA: $\omega_0, \omega_1$          | 0.080, 0.142        | 0.115, 0.313   | 0.095, 0.003   | 0.081, 0.177   | 0.118, 0.181   | 0.135, 0.186   |
| <b>Branch-site models</b>         |                     |                |                |                |                |                |
| A0: $p_{2a}$ ( $\omega_2 = 1$ )   | 0.078               | 0.059          | 0.111          | 0.082          | 0.155          | 0.096          |
| AA: $p_{2a}, \omega_2$            | 0.078, 1.000        | 0.025, 3.102   | 0.109, 8.895   | 0.082, 1.000   | 0.155, 1.000   | 0.011, 19.742  |
| Positively selected sites (BEB)   | 5 M 11 K 93 P 105 C |                |                |                |                |                |
| <b>LRT, P</b>                     |                     |                |                |                |                |                |
| M0 versus BA                      | 0.078               | 0.009          | <0.001         | 0.216          | 0.752          | 0.712          |
| BA versus B0                      | <0.001              | 0.007          | <0.001         | 0.011          | 0.418          | 0.151          |
| A0 versus AA                      | 1.000               | 0.802          | 0.022          | 1.000          | 1.000          | 0.082          |

$\omega$ , the ratios of nonsynonymous substitution per nonsynonymous site to synonymous substitution per synonymous site;  $\omega_0, \omega_1$ , background and foreground  $\omega$  values, respectively; APIME, *Apis mellifera*; ACREC, *Acromyrmex echinator*; LOCMI, *Locusta migratoria*.

Figure 1

[Click here to download Figure figure1\\_20161006.pdf](#)

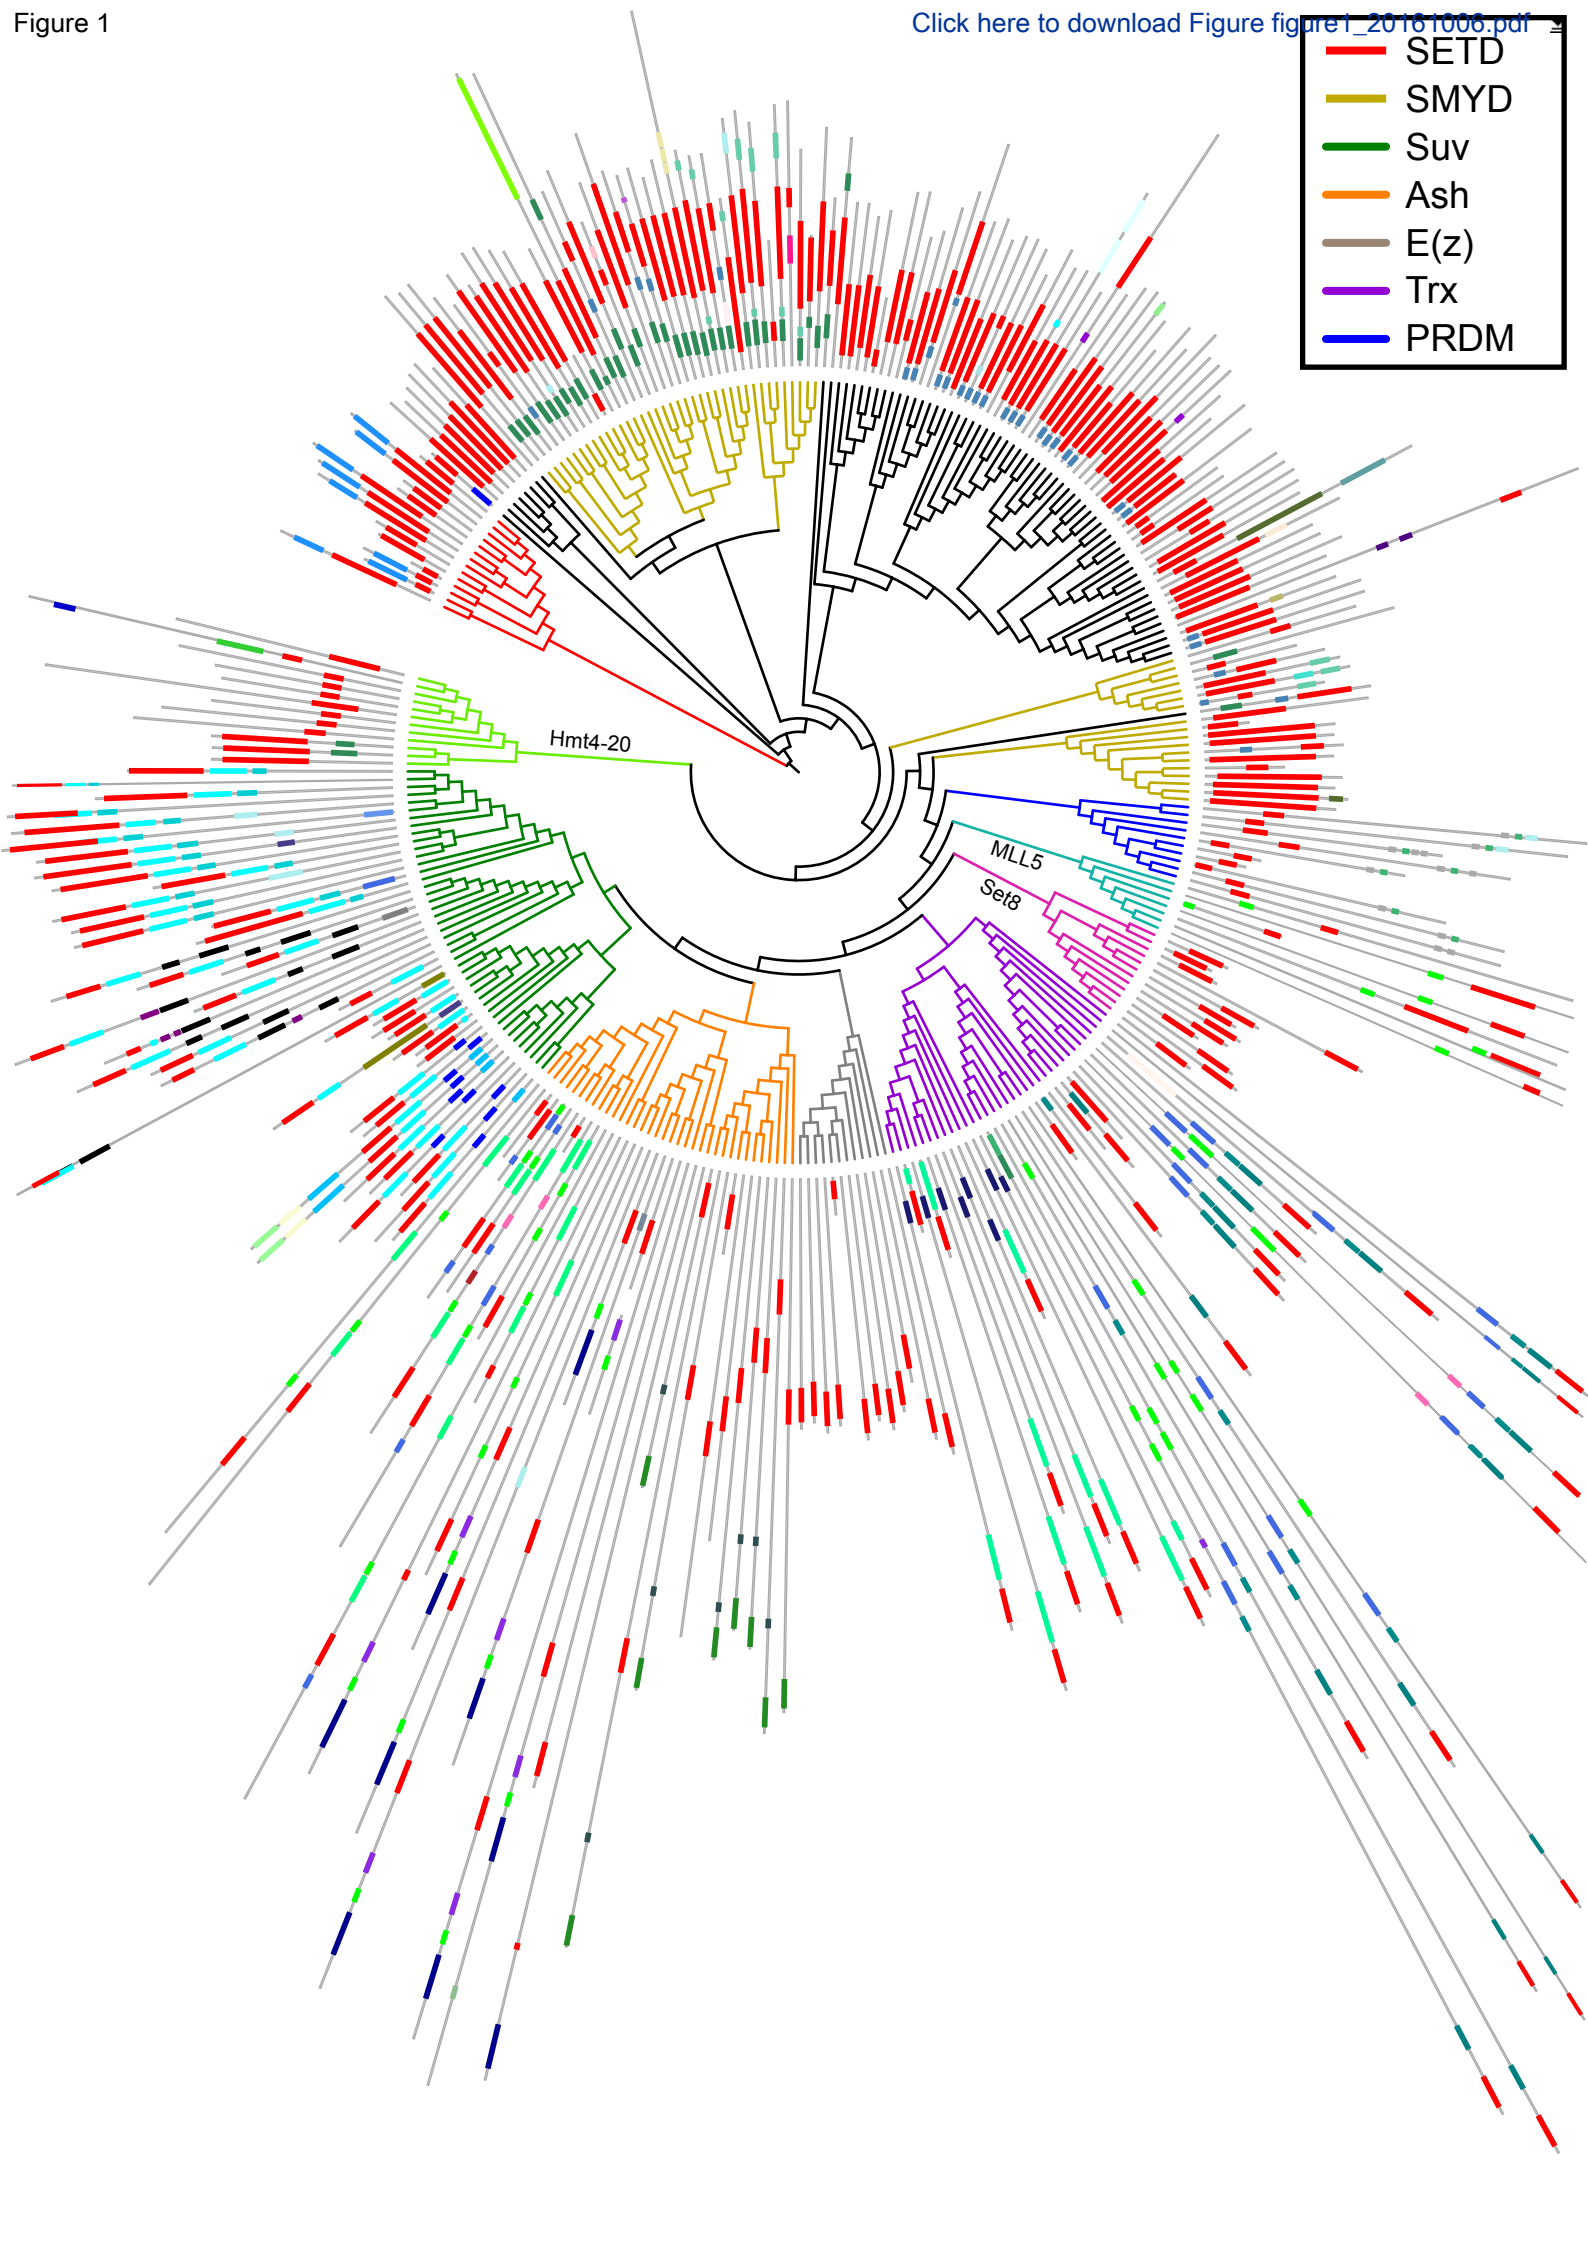

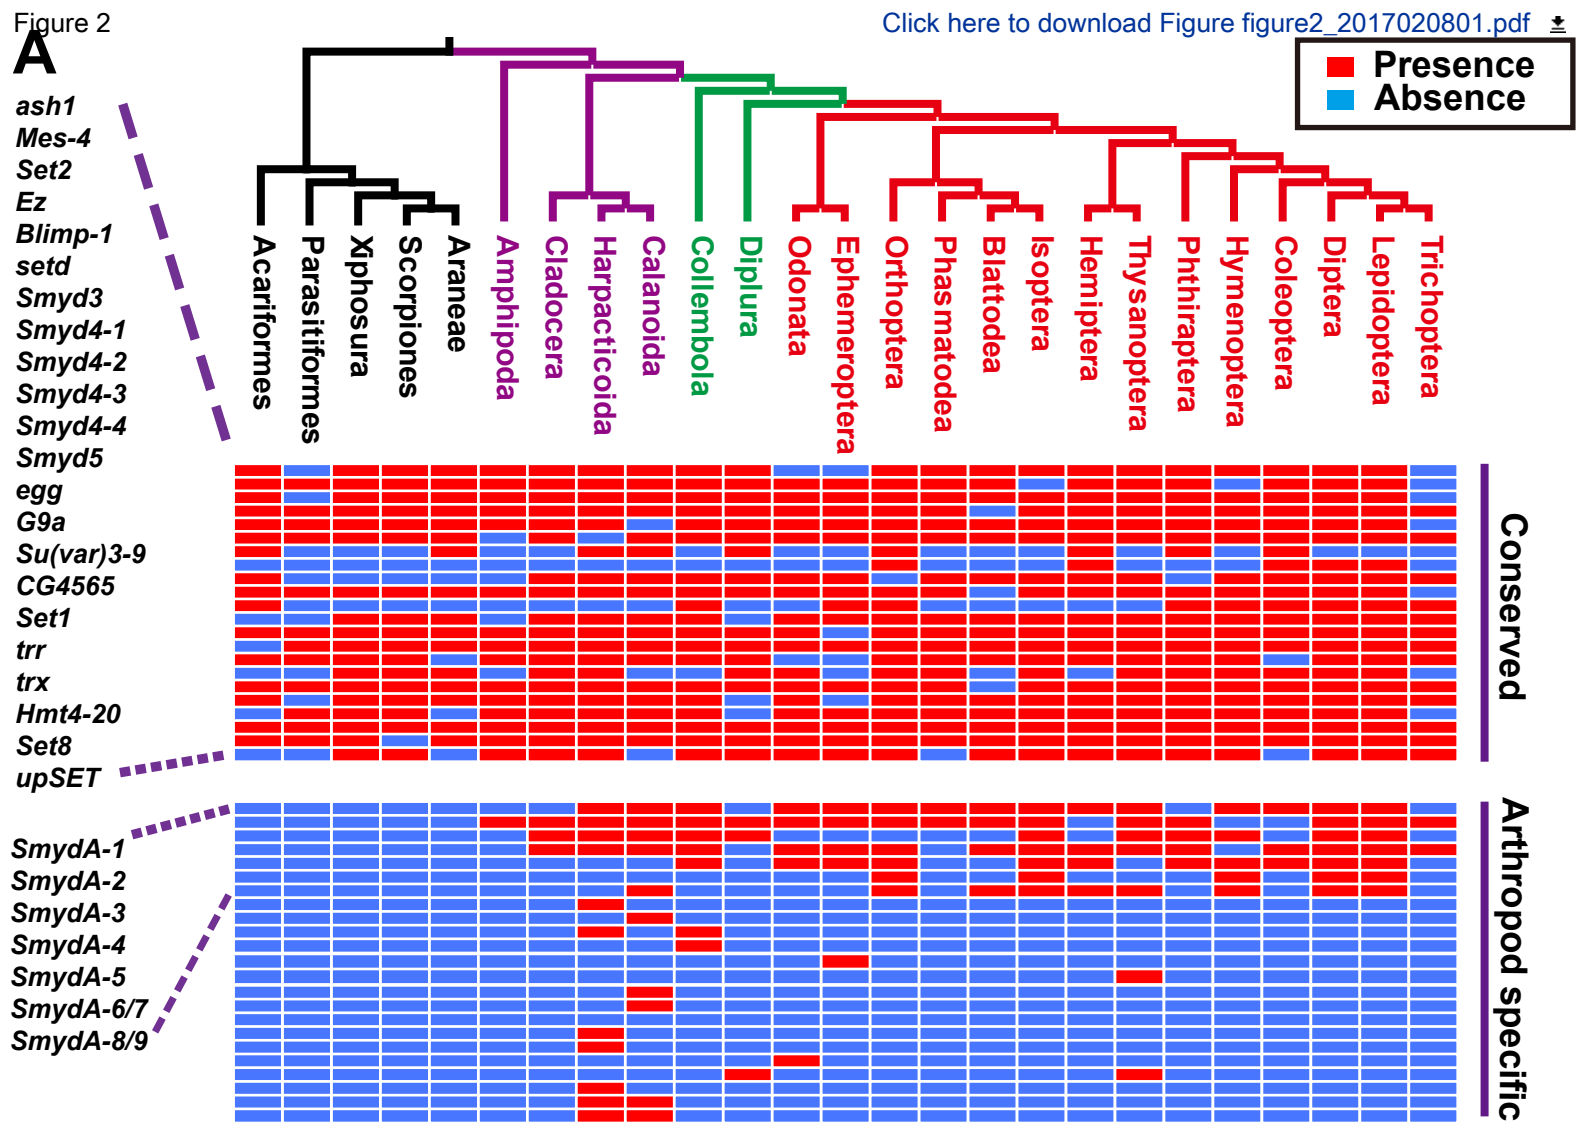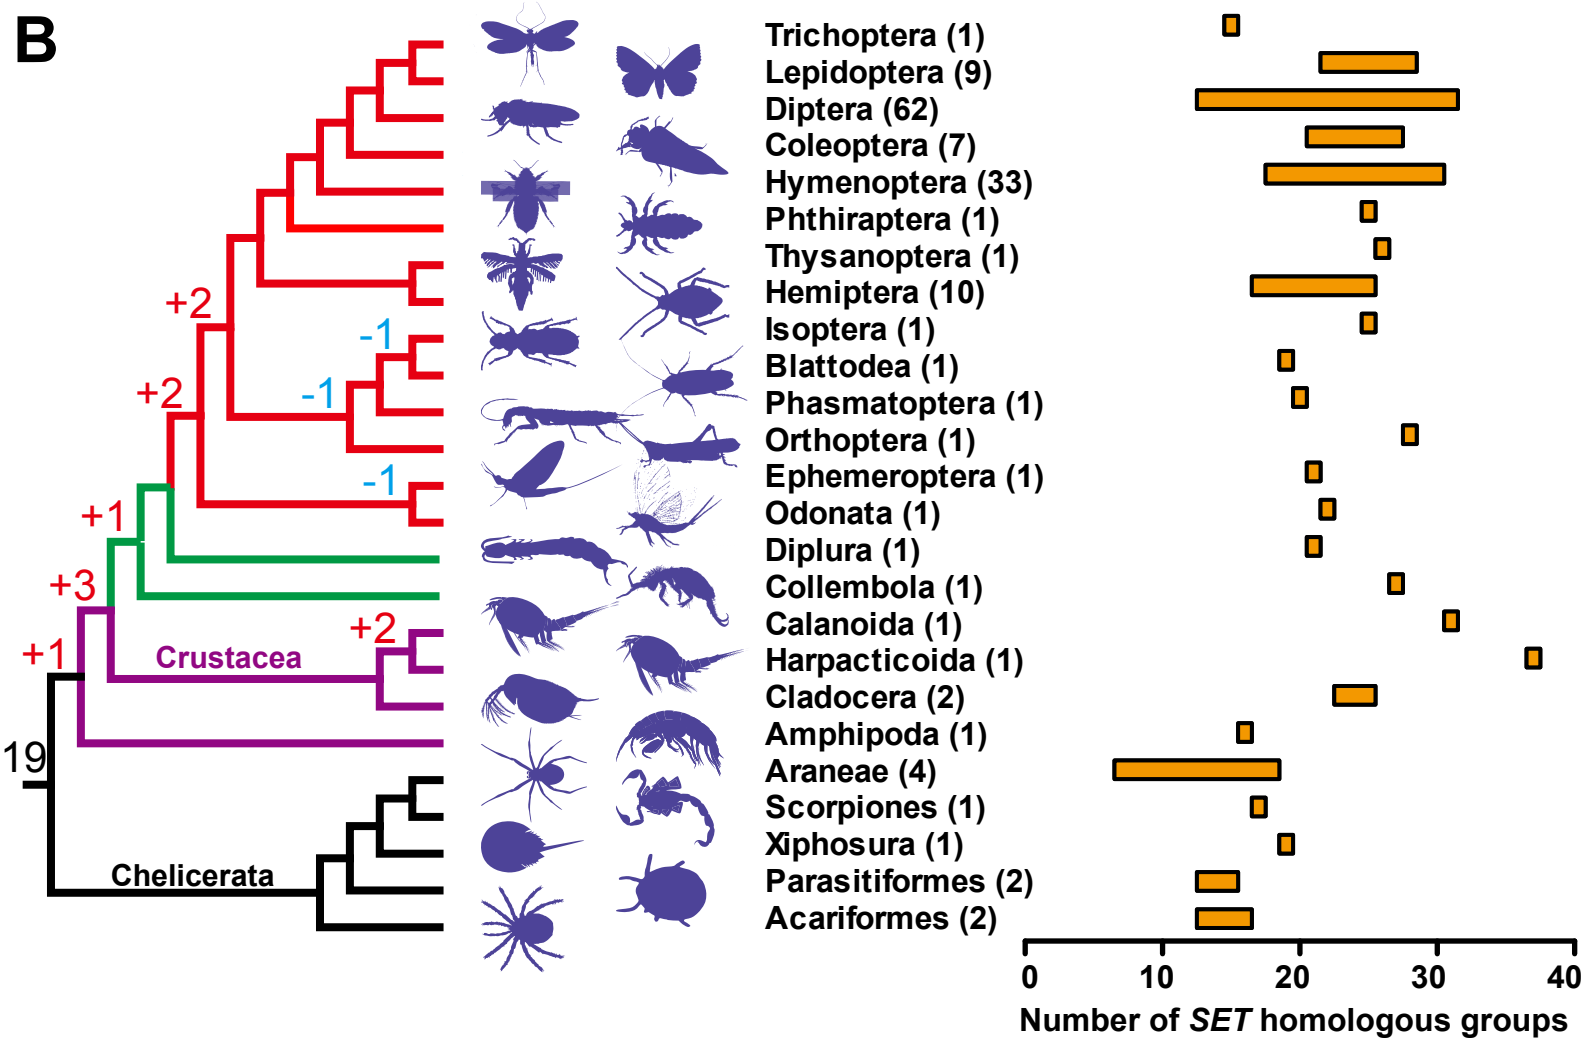

Figure 3

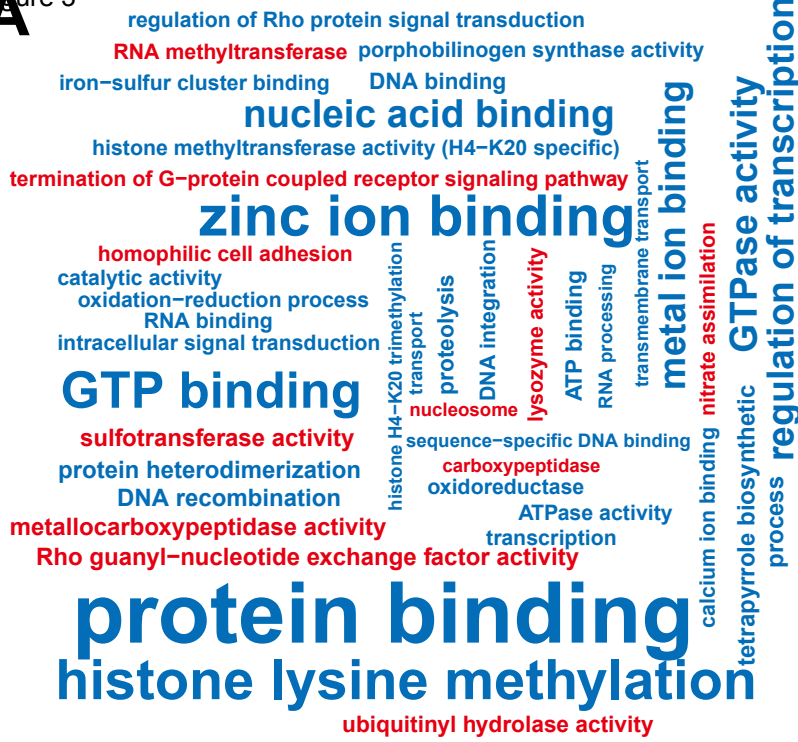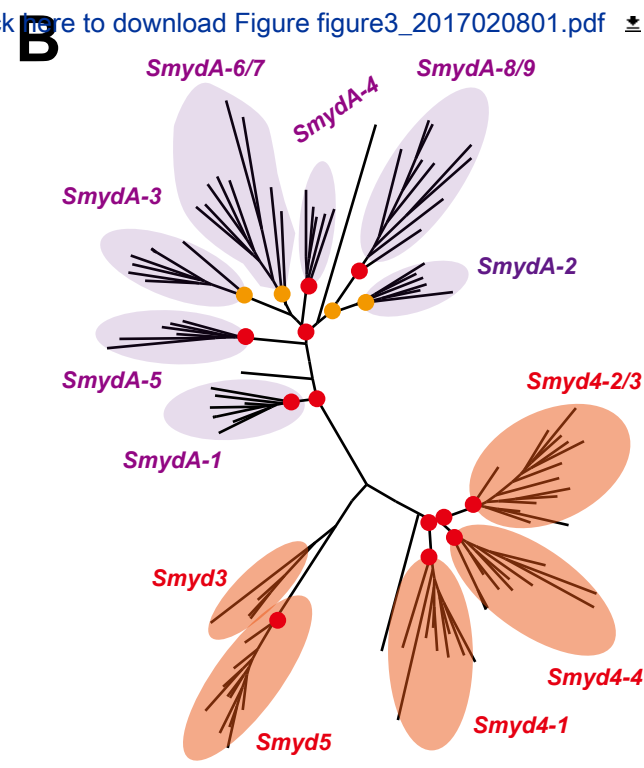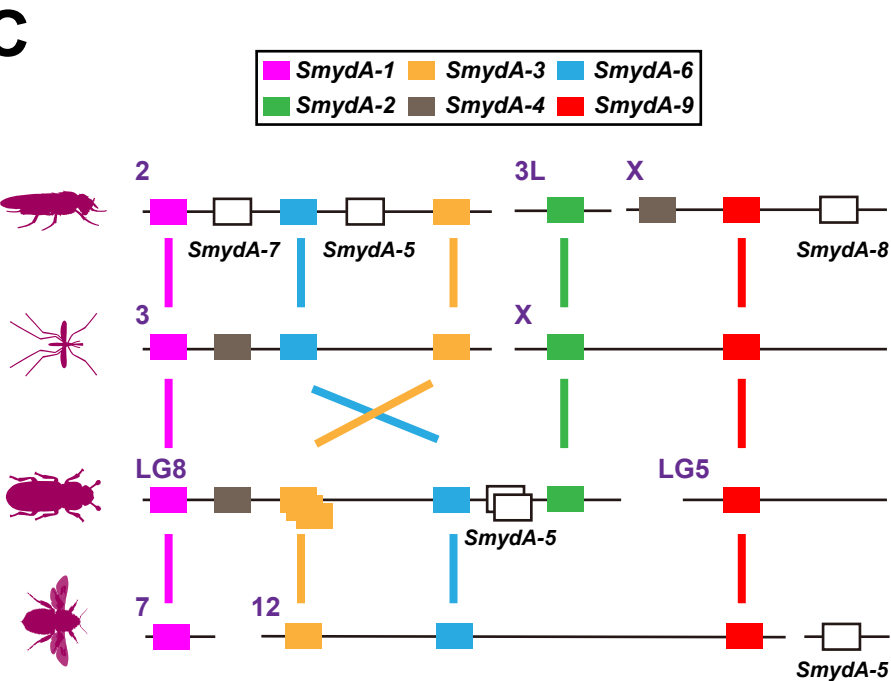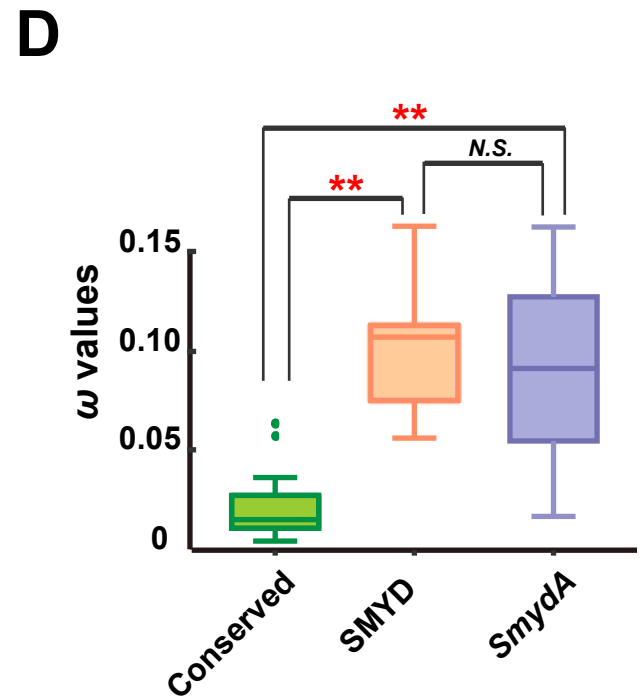

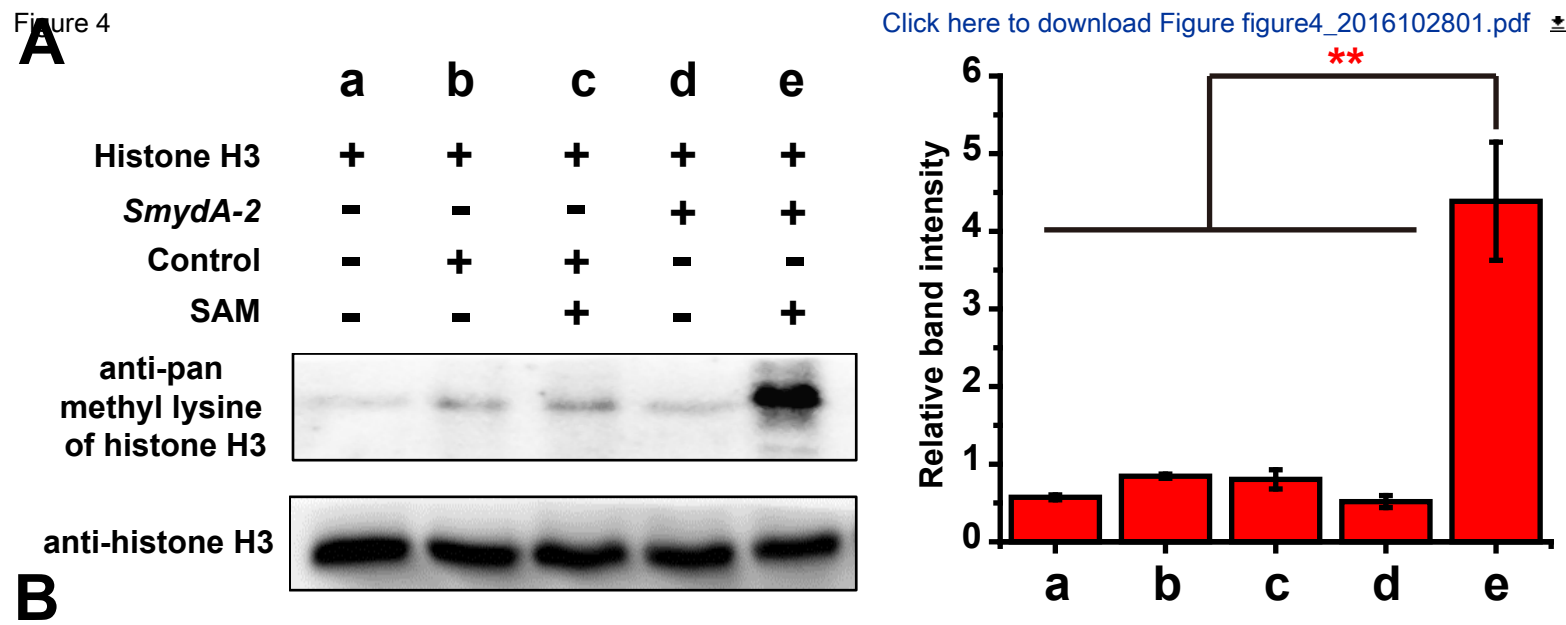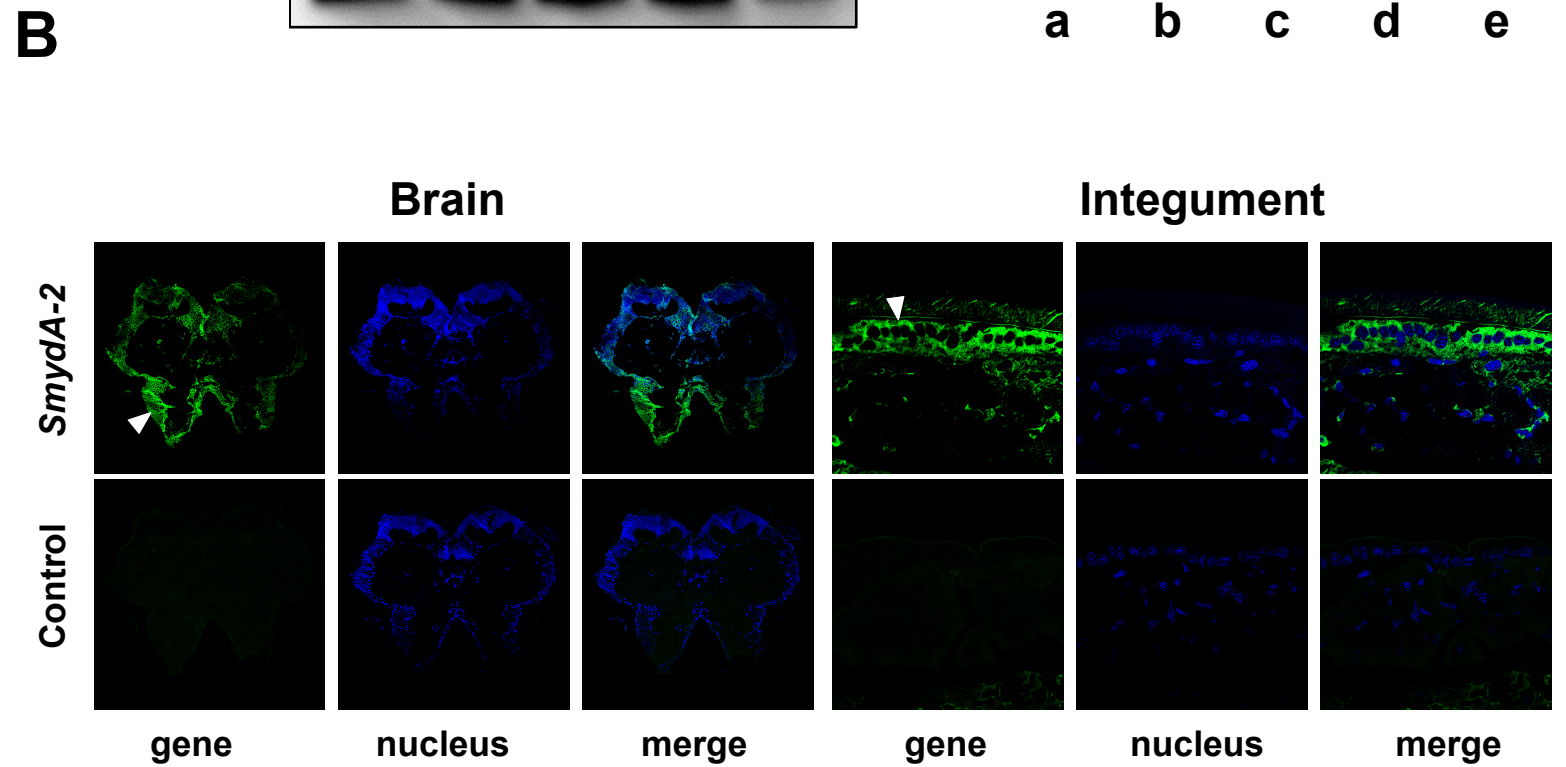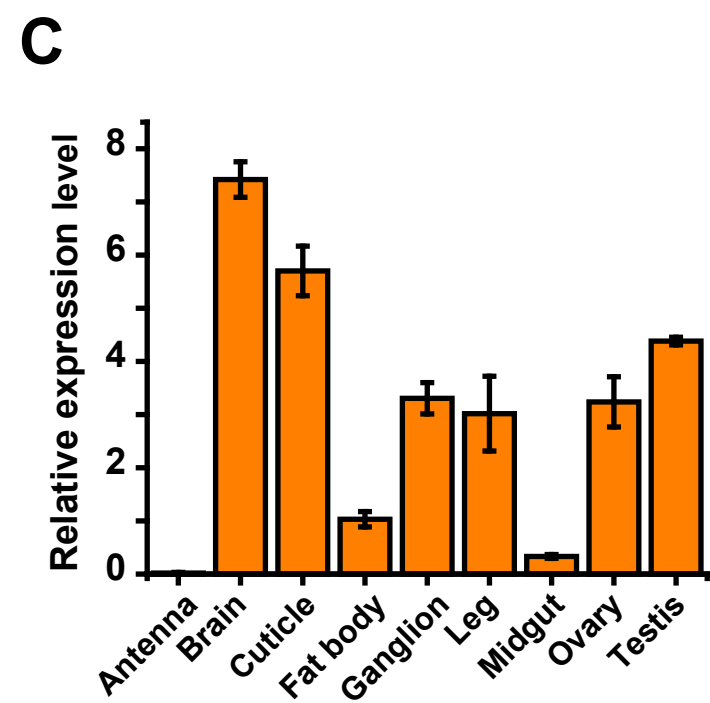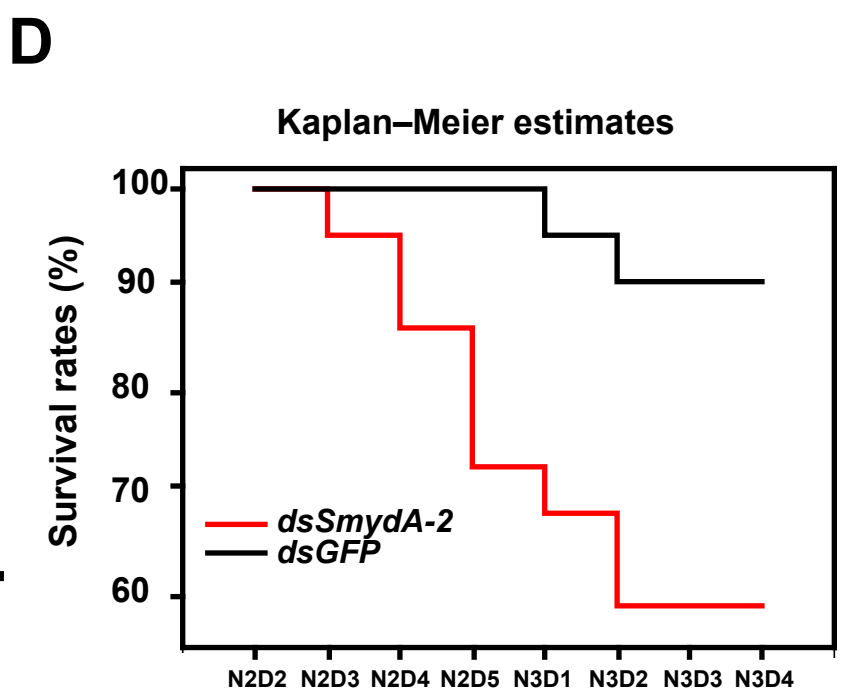

Figure 5

[Click here to download Figure figure5\\_2017020801.pdf](#)

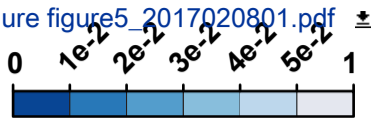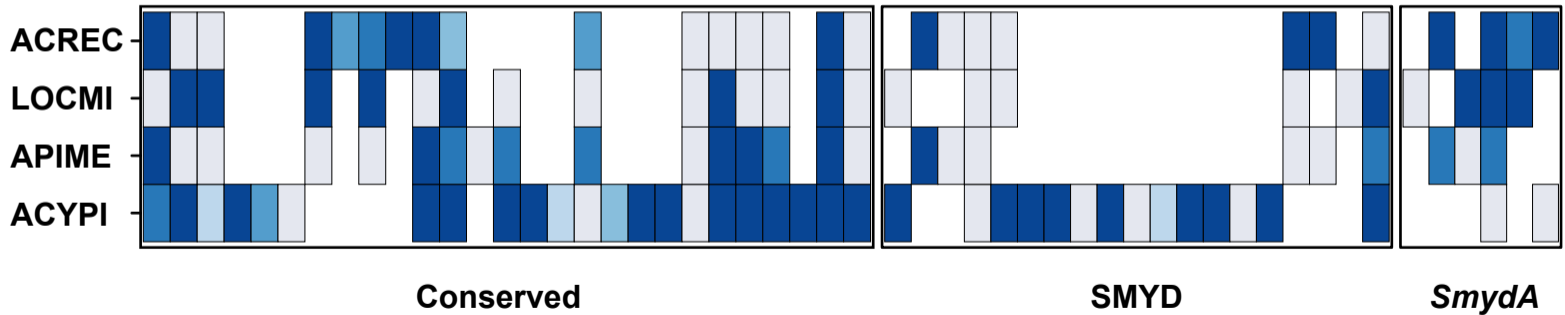

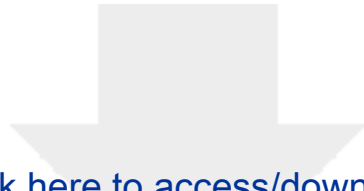

[Click here to access/download](#)

**Supplementary Material**

[insectsSetDomain\\_supply\\_giga\\_17021701.pdf](#)

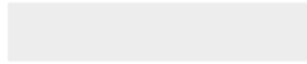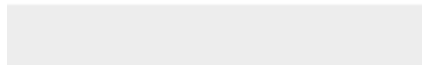

Supplement: gix031_GIGA-D-16-00127_Revision_2.pdf [file gix031_GIGA-D-16-00127_Revision_2.pdf]
