# Supplementary material for: Comparative genomic analysis of SET domain family reveals the origin, expansion, and putative function of the arthropod-specific SmydA genes as histone modifiers in insects
Source: PubMed Central journal article supplement (PMC5459927; doi:10.1093/gigascience/gix031), 2017-04-22
Supplement: gix031_Response_to_Reviewer_Comments_revision_1.pdf [file gix031_Response_to_Reviewer_Comments_revision_1.pdf]

Close

We addressed all the editorial concerns.
