# Supplementary material for: Comparative genomic analysis of SET domain family reveals the origin, expansion, and putative function of the arthropod-specific SmydA genes as histone modifiers in insects
Source: PubMed Central journal article supplement (PMC5459927; doi:10.1093/gigascience/gix031), 2017-04-22
Supplement: gix031_Supp.pdf [file gix031_Supp.pdf]

# Supplementary materials

**Comparative genomic analysis of *SET*-domain family reveals the origin, expansion, and putative function of the arthropod-specific *SmydA* genes as histone modifier in insects**

**Feng Jiang<sup>1,\*</sup>, Qing Liu<sup>1,2,\*</sup>, Yanli Wang<sup>2,3</sup>, Jie Zhang<sup>1</sup>, Huimin Wang<sup>1</sup>, Tianqi Song<sup>3</sup>, Meiling Yang<sup>2</sup>, Xianhui Wang<sup>2,#</sup>, Le Kang<sup>1,2,#</sup>**

<sup>1</sup> Beijing Institutes of Life Science, Chinese Academy of Sciences, Beijing, China

<sup>2</sup> Institute of Zoology, Chinese Academy of Sciences, Beijing, China

<sup>3</sup> Institute of Applied Biology, Shanxi University, Taiyuan, Shanxi, China

\*These authors contributed equally to this study.

Running head: Evolution of *SET* Genes in Insects

## Supplementary Tables

**Supplementary Table S1. The arthropod genome data involved in this study.**

| Species                          | Abbreviation | Database                                                                                                                                   | Version    |
|----------------------------------|--------------|--------------------------------------------------------------------------------------------------------------------------------------------|------------|
| <i>Pediculus humanus</i>         | PEDHU        | ftp.vectorbase.org/public_data/organism_data/phumanus/Geneset/phumanus.PEPTI<br>DES-PhumU1.2.fa.gz                                         | v1.2       |
| <i>Blattella germanica</i>       | BLAGE        | ftp://ftp.hgsc.bcm.edu/I5K-pilot/German_cockroach/maker_annotation/version_0.5.3/BGER.faa                                                  | v0.5.3     |
| <i>Agrilus planipennis</i>       | AGRPL        | ftp://ftp.hgsc.bcm.tmc.edu/I5K-pilot/Emerald_ash_borer/maker_annotation/version_0.5.3/APLA.faa                                             | v0.5.3     |
| <i>Anoplophora glabripennis</i>  | ANOGL        | ftp://ftp.hgsc.bcm.edu/I5K-pilot/Asian_long-horned_beetle/maker_annotation/version_0.5.3/AGLA.faa                                          | v0.5.3     |
| <i>Dendroctonus ponderosae</i>   | DENPO        | ftp://ftp.ensemblgenomes.org/pub/metazoa/release-32/fasta/dendroctonus_ponderosae/pep/Dendroctonus_ponderosae.GCA_000355655.1.pep.all.f.gz | ensembl-32 |
| <i>Leptinotarsa decemlineata</i> | LEPDE        | ftp://ftp.hgsc.bcm.edu/I5K-pilot/Colorado_Potato_Beetle/maker_annotation/version_0.5.3/LDEC.faa                                            | v0.5.3     |
| <i>Onthophagus taurus</i>        | ONTTA        | ftp://ftp.hgsc.bcm.edu/I5K-pilot/Bull-headed_Dung_beetle/maker_annotation/version_0.5.3/OTAU.faa                                           | v0.5.3     |
| <i>Oryctes borbonicus</i>        | ORYBO        | ftp://ftp.ncbi.nlm.nih.gov/genomes/all/GCA_001443705.1_ASM144370v1/GCA_001443705.1_ASM144370v1_protein.faa.gz                              | v1         |
| <i>Tribolium castaneum</i>       | TRICA        | http://nosil-lab.group.shef.ac.uk/wp-content/uploads/data/timema_cristinae_draft_2014_gff_prots.tar.bz2                                    | v3.0       |
| <i>Aedes aegypti</i>             | AEDAE        | ftp.vectorbase.org/public_data/organism_data/aaegypti/Geneset/aaegypti.PEPTIDE<br>S-AaegL1.2.f.gz                                          | v1.2       |
| <i>Aedes albopictus</i>          | AEDAL        | https://www.vectorbase.org/download/aedes-albopictus-foshanpeptidesaalof11f.gz                                                             | v1.1       |

|                               |       |                                                                                                                                                                                                                                                                 |            |
|-------------------------------|-------|-----------------------------------------------------------------------------------------------------------------------------------------------------------------------------------------------------------------------------------------------------------------|------------|
| <i>Anopheles albimanus</i>    | ANOAL | <a href="https://www.vectorbase.org/download/anopheles-albimanus-steclapeptidesaalbs13fagz">https://www.vectorbase.org/download/anopheles-albimanus-steclapeptidesaalbs13fagz</a>                                                                               | v1.3       |
| <i>Anopheles arabiensis</i>   | ANOAR | <a href="https://www.vectorbase.org/download/anopheles-arabiensis-dongolapeptidesaarad13fagz">https://www.vectorbase.org/download/anopheles-arabiensis-dongolapeptidesaarad13fagz</a>                                                                           | v1.3       |
| <i>Anopheles atroparvus</i>   | ANOAT | <a href="https://www.vectorbase.org/download/anopheles-atroparvus-ebropeptidesaatre13fagz">https://www.vectorbase.org/download/anopheles-atroparvus-ebropeptidesaatre13fagz</a>                                                                                 | v1.3       |
| <i>Anopheles christyi</i>     | ANOCH | <a href="https://www.vectorbase.org/download/anopheles-christyi-achkn1017peptidesachra13fagz">https://www.vectorbase.org/download/anopheles-christyi-achkn1017peptidesachra13fagz</a>                                                                           | v1.3       |
| <i>Anopheles coluzzii</i>     | ANOCO | <a href="https://www.vectorbase.org/download/anopheles-coluzzii-mali-nihpeptidesacolm13fagz">https://www.vectorbase.org/download/anopheles-coluzzii-mali-nihpeptidesacolm13fagz</a>                                                                             | v1.3       |
| <i>Anopheles culicifacies</i> | ANOCU | <a href="https://www.vectorbase.org/download/anopheles-culicifacies-37peptidesacula13fagz">https://www.vectorbase.org/download/anopheles-culicifacies-37peptidesacula13fagz</a>                                                                                 | v1.3       |
| <i>Anopheles darlingi</i>     | ANODA | <a href="ftp://ftp.ensemblgenomes.org/pub/metazoa/release-32/fasta/anopheles_darlingi/pep/Anopheles_darlingi.AdarC3.pep.all.fa.gz">ftp://ftp.ensemblgenomes.org/pub/metazoa/release-32/fasta/anopheles_darlingi/pep/Anopheles_darlingi.AdarC3.pep.all.fa.gz</a> | ensembl-32 |
| <i>Anopheles dirus</i>        | ANODI | <a href="https://www.vectorbase.org/download/anopheles-dirus-wrair2peptidesadirw13fagz">https://www.vectorbase.org/download/anopheles-dirus-wrair2peptidesadirw13fagz</a>                                                                                       | v1.3       |
| <i>Anopheles epiroticus</i>   | ANOEP | <a href="https://www.vectorbase.org/download/anopheles-epiroticus-epiroticus2peptidesaepie13fagz">https://www.vectorbase.org/download/anopheles-epiroticus-epiroticus2peptidesaepie13fagz</a>                                                                   | v1.3       |
| <i>Anopheles farauti</i>      | ANOFA | <a href="https://www.vectorbase.org/download/anopheles-farauti-far1peptidesafarf21fagz">https://www.vectorbase.org/download/anopheles-farauti-far1peptidesafarf21fagz</a>                                                                                       | v1.3       |
| <i>Anopheles funestus</i>     | ANOFU | <a href="https://www.vectorbase.org/download/anopheles-funestus-fumozpeptidesafunf13fagz">https://www.vectorbase.org/download/anopheles-funestus-fumozpeptidesafunf13fagz</a>                                                                                   | v1.3       |
| <i>Anopheles gambiae</i>      | ANOGA | <a href="ftp://ftp.vectorbase.org/public_data/organism_data/agambiae/Geneset/agambiae.PEPTIDES-AgamP3.6.fa.gz">ftp://ftp.vectorbase.org/public_data/organism_data/agambiae/Geneset/agambiae.PEPTIDES-AgamP3.6.fa.gz</a>                                         | v3.6       |

|                                  |       |                                                                                                                                                                                                                                                                                                                                                       |        |
|----------------------------------|-------|-------------------------------------------------------------------------------------------------------------------------------------------------------------------------------------------------------------------------------------------------------------------------------------------------------------------------------------------------------|--------|
| <i>Anopheles maculatus</i>       | ANOMA | <a href="https://www.vectorbase.org/download/anopheles-maculatus-maculatus3peptidesam">https://www.vectorbase.org/download/anopheles-maculatus-maculatus3peptidesam</a><br>acm13fagz                                                                                                                                                                  | v1.3   |
| <i>Anopheles melas</i>           | ANOME | <a href="https://www.vectorbase.org/download/anopheles-melas-cm1001059apeptidesamelc">https://www.vectorbase.org/download/anopheles-melas-cm1001059apeptidesamelc</a><br>21fagz                                                                                                                                                                       | v2.1   |
| <i>Anopheles merus</i>           | ANOMR | <a href="https://www.vectorbase.org/download/anopheles-merus-mafpeptidesamerm21fagz">https://www.vectorbase.org/download/anopheles-merus-mafpeptidesamerm21fagz</a><br><a href="https://www.vectorbase.org/download/anopheles-minimus-minimus1peptidesamin">https://www.vectorbase.org/download/anopheles-minimus-minimus1peptidesamin</a><br>m13fagz | v2.1   |
| <i>Anopheles minimus</i>         | ANOMI | <a href="https://www.vectorbase.org/download/anopheles-quadriannulatus-sangwepeptidesa">https://www.vectorbase.org/download/anopheles-quadriannulatus-sangwepeptidesa</a><br>quas13fagz                                                                                                                                                               | v1.3   |
| <i>Anopheles quadriannulatus</i> | ANOQU | <a href="https://www.vectorbase.org/download/anopheles-sinensis-sinensispeptidesasins21fa">https://www.vectorbase.org/download/anopheles-sinensis-sinensispeptidesasins21fa</a><br>gz                                                                                                                                                                 | v1.3   |
| <i>Anopheles sinensis</i>        | ANOSI | <a href="https://www.vectorbase.org/download/anopheles-stephensi-indianpeptidesastei22fa">https://www.vectorbase.org/download/anopheles-stephensi-indianpeptidesastei22fa</a><br>gz                                                                                                                                                                   | v2.1   |
| <i>Anopheles stephensi</i>       | ANOST | <a href="ftp://ftp.ncbi.nlm.nih.gov/genomes/all/GCF_000806345.1_ASM80634v1/GCF_000806345.1_ASM80634v1_protein.faa.gz">ftp://ftp.ncbi.nlm.nih.gov/genomes/all/GCF_000806345.1_ASM80634v1/GCF_000806345.1_ASM80634v1_protein.faa.gz</a>                                                                                                                 | v2.2   |
| <i>Bactrocera cucurbitae</i>     | BACCU | <a href="http://www.insect-genome.com/data/genome_download/Bactrocera_dorsalis/Bactrocera_dorsalis_protein.fasta.gz">http://www.insect-genome.com/data/genome_download/Bactrocera_dorsalis/Bactrocera_dorsalis_protein.fasta.gz</a>                                                                                                                   | v1     |
| <i>Bactrocera dorsalis</i>       | BACDO | <a href="ftp://ftp.ncbi.nlm.nih.gov/genomes/all/GCF_001652005.1_ASM165200v1/GCF_001652005.1_ASM165200v1_protein.faa.gz">ftp://ftp.ncbi.nlm.nih.gov/genomes/all/GCF_001652005.1_ASM165200v1/GCF_001652005.1_ASM165200v1_protein.faa.gz</a>                                                                                                             | v2.7   |
| <i>Ceratina calcarata</i>        | CERCA | <a href="ftp://ftp.hgsc.bcm.edu/I5K-pilot/Mediterranean_fruit_fly/maker_annotation/version_0.5.3/CCAP.faa">ftp://ftp.hgsc.bcm.edu/I5K-pilot/Mediterranean_fruit_fly/maker_annotation/version_0.5.3/CCAP.faa</a>                                                                                                                                       | v1.1   |
| <i>Ceratitis capitata</i>        | CERCP | <a href="ftp.vectorbase.org/public_data/organism_data/cquinquefasciatus/Geneset/cquinquefasciatus.BASEFEATURES_Johannesburg-CpipJ1.2.gff3.gz">ftp.vectorbase.org/public_data/organism_data/cquinquefasciatus/Geneset/cquinquefasciatus.BASEFEATURES_Johannesburg-CpipJ1.2.gff3.gz</a>                                                                 | v0.5.3 |
| <i>Culex quinquefasciatus</i>    | CULQU | <a href="ftp.vectorbase.org/public_data/organism_data/cquinquefasciatus/Geneset/cquinquefasciatus.BASEFEATURES_Johannesburg-CpipJ1.2.gff3.gz">ftp.vectorbase.org/public_data/organism_data/cquinquefasciatus/Geneset/cquinquefasciatus.BASEFEATURES_Johannesburg-CpipJ1.2.gff3.gz</a>                                                                 | v1.2   |

|                                |       |                                                                                                                                       |            |
|--------------------------------|-------|---------------------------------------------------------------------------------------------------------------------------------------|------------|
| <i>Drosophila ananassae</i>    | DROAN | ftp://ftp.ensemblgenomes.org/pub/metazoa/release-32/fasta/drosophila_ananassae/pep/Drosophila_ananassae.GCA_000005115.1.pep.all.fa.gz | ensembl-32 |
| <i>Drosophila biarmipes</i>    | DROBI | ftp://ftp.hgsc.bcm.edu/DmodENCODE/maker_annotation/Drosophila_biarmipes/version_0.5.3/DBIA.faa                                        | v0.5.3     |
| <i>Drosophila bipectinata</i>  | DROBP | ftp://ftp.hgsc.bcm.edu/DmodENCODE/maker_annotation/Drosophila_bipectinata/version_0.5.3/DBIP.faa                                      | v0.5.3     |
| <i>Drosophila elegans</i>      | DROEL | ftp://ftp.hgsc.bcm.edu/DmodENCODE/maker_annotation/Drosophila_elegans/version_0.5.3/DELE.faa                                          | v0.5.3     |
| <i>Drosophila erecta</i>       | DROER | ftp://ftp.ensemblgenomes.org/pub/metazoa/release-32/fasta/drosophila_erecta/pep/Drosophila_erecta.GCA_000005135.1.pep.all.fa.gz       | ensembl-32 |
| <i>Drosophila eugracilis</i>   | DROEU | ftp://ftp.hgsc.bcm.edu/DmodENCODE/maker_annotation/Drosophila_eugracilis/version_0.5.3/DEUG.faa                                       | v0.5.3     |
| <i>Drosophila ficusphila</i>   | DROFI | ftp://ftp.hgsc.bcm.edu/DmodENCODE/maker_annotation/Drosophila_ficusphila/version_0.5.3/DFIC.faa                                       | v0.5.3     |
| <i>Drosophila grimshawi</i>    | DROGR | ftp://ftp.ensemblgenomes.org/pub/metazoa/release-32/fasta/drosophila_grimshawi/pep/Drosophila_grimshawi.GCA_000005155.1.pep.all.fa.gz | ensembl-32 |
| <i>Drosophila kikkawai</i>     | DROKI | ftp://ftp.hgsc.bcm.edu/DmodENCODE/maker_annotation/Drosophila_kikkawai/version_0.5.3/DKIK.faa                                         | v0.5.3     |
| <i>Drosophila melanogaster</i> | DROME | ftp://ftp.flybase.net/genomes/Drosophila_melanogaster/dmel_r6.04_FB2015_01/fasta/dmel-all-translation-r6.04.fasta.gz                  | r6.04      |
| <i>Drosophila miranda</i>      | DROMI | ftp://ftp.ncbi.nih.gov/genomes/Drosophila_miranda/protein/Gnomon_prot.fsa.gz                                                          | v2.2       |
| <i>Drosophila mojavensis</i>   | DROMO | http://www.insect-genome.com/data/genome_download/Drosophila_mojavensis/Drosophila_mojavensis_protein.fasta.gz                        | v2         |

|                                 |       |                                                                                                                                                                                                                                                                                               |            |
|---------------------------------|-------|-----------------------------------------------------------------------------------------------------------------------------------------------------------------------------------------------------------------------------------------------------------------------------------------------|------------|
| <i>Drosophila persimilis</i>    | DROPE | <a href="ftp://ftp.ensemblgenomes.org/pub/metazoa/release-32/fasta/drosophila_persimilis/pep/Drosophila_persimilis.GCA_000005195.1.pep.all.fa.gz">ftp://ftp.ensemblgenomes.org/pub/metazoa/release-32/fasta/drosophila_persimilis/pep/Drosophila_persimilis.GCA_000005195.1.pep.all.fa.gz</a> | ensembl-32 |
| <i>Drosophila pseudoobscura</i> | DROPS | <a href="ftp.flybase.net/genomes/Drosophila_pseudoobscura/dpse_r2.10_FB2010_04/fasta/dpse-all-translation-r2.10.fasta.gz">ftp.flybase.net/genomes/Drosophila_pseudoobscura/dpse_r2.10_FB2010_04/fasta/dpse-all-translation-r2.10.fasta.gz</a>                                                 | r2.10      |
| <i>Drosophila rhopaloa</i>      | DRORH | <a href="ftp://ftp.hgsc.bcm.edu/DmodENCODE/maker_annotation/Drosophila_rhopaloa/version_0.5.3/DRHO.faa">ftp://ftp.hgsc.bcm.edu/DmodENCODE/maker_annotation/Drosophila_rhopaloa/version_0.5.3/DRHO.faa</a>                                                                                     | v0.5.3     |
| <i>Drosophila sechellia</i>     | DROSE | <a href="ftp://ftp.ensemblgenomes.org/pub/metazoa/release-32/fasta/drosophila_sechellia/pep/Drosophila_sechellia.GCA_000005215.1.pep.all.fa.gz">ftp://ftp.ensemblgenomes.org/pub/metazoa/release-32/fasta/drosophila_sechellia/pep/Drosophila_sechellia.GCA_000005215.1.pep.all.fa.gz</a>     | ensembl-32 |
| <i>Drosophila simulans</i>      | DROSI | <a href="ftp://ftp.ensemblgenomes.org/pub/metazoa/release-32/fasta/drosophila_simulans/pep/Drosophila_simulans.GCA_000259055.1.pep.all.fa.gz">ftp://ftp.ensemblgenomes.org/pub/metazoa/release-32/fasta/drosophila_simulans/pep/Drosophila_simulans.GCA_000259055.1.pep.all.fa.gz</a>         | ensembl-32 |
| <i>Drosophila suzukii</i>       | DROSU | <a href="ftp://ftp.ncbi.nih.gov/genomes/Drosophila_suzukii/protein/Gnomon_prot.fsa.gz">ftp://ftp.ncbi.nih.gov/genomes/Drosophila_suzukii/protein/Gnomon_prot.fsa.gz</a>                                                                                                                       | v1         |
| <i>Drosophila takahashii</i>    | DROTA | <a href="ftp://ftp.hgsc.bcm.edu/DmodENCODE/maker_annotation/Drosophila_takahashii/version_0.5.3/DTAK.faa">ftp://ftp.hgsc.bcm.edu/DmodENCODE/maker_annotation/Drosophila_takahashii/version_0.5.3/DTAK.faa</a>                                                                                 | v0.5.3     |
| <i>Drosophila virilis</i>       | DROVI | <a href="ftp://ftp.ensemblgenomes.org/pub/metazoa/release-32/fasta/drosophila_virilis/pep/Drosophila_virilis.GCA_000005245.1.pep.all.fa.gz">ftp://ftp.ensemblgenomes.org/pub/metazoa/release-32/fasta/drosophila_virilis/pep/Drosophila_virilis.GCA_000005245.1.pep.all.fa.gz</a>             | ensembl-32 |
| <i>Drosophila willistoni</i>    | DROWI | <a href="ftp://ftp.ensemblgenomes.org/pub/metazoa/release-32/fasta/drosophila_willistoni/pep/Drosophila_willistoni.GCA_000005925.1.pep.all.fa.gz">ftp://ftp.ensemblgenomes.org/pub/metazoa/release-32/fasta/drosophila_willistoni/pep/Drosophila_willistoni.GCA_000005925.1.pep.all.fa.gz</a> | ensembl-32 |
| <i>Drosophila yakuba</i>        | DROYA | <a href="ftp://ftp.flybase.net/genomes/Drosophila_yakuba/dyak_r1.3_FB2010_02/fasta/dyak-all-translation-r1.3.fasta.gz">ftp://ftp.flybase.net/genomes/Drosophila_yakuba/dyak_r1.3_FB2010_02/fasta/dyak-all-translation-r1.3.fasta.gz</a>                                                       | r5.27      |
| <i>Glossina austeni</i>         | GLOAU | <a href="https://www.vectorbase.org/download/glossina-austeni-ttripeptidesgaust13fagz">https://www.vectorbase.org/download/glossina-austeni-ttripeptidesgaust13fagz</a>                                                                                                                       | v1.3       |
| <i>Glossina brevipalpis</i>     | GLOBR | <a href="https://www.vectorbase.org/download/glossina-brevipalpis-iaeapeptidesgbrei13fagz">https://www.vectorbase.org/download/glossina-brevipalpis-iaeapeptidesgbrei13fagz</a>                                                                                                               | v1.3       |
| <i>Glossina fuscipes</i>        | GLOFU | <a href="https://www.vectorbase.org/download/glossina-fuscipes-iaeapeptidesgfusi13fagz">https://www.vectorbase.org/download/glossina-fuscipes-iaeapeptidesgfusi13fagz</a>                                                                                                                     | v1.3       |

|                              |       |                                                                                                                                                                                                                                                                                                                                                                                                                                                            |        |
|------------------------------|-------|------------------------------------------------------------------------------------------------------------------------------------------------------------------------------------------------------------------------------------------------------------------------------------------------------------------------------------------------------------------------------------------------------------------------------------------------------------|--------|
| <i>Glossina morsitans</i>    | GLOMO | <a href="https://www.vectorbase.org/download/glossina-morsitans-yalepeptidesgmory15fagz">https://www.vectorbase.org/download/glossina-morsitans-yalepeptidesgmory15fagz</a>                                                                                                                                                                                                                                                                                | v1.5   |
| <i>Glossina pallidipes</i>   | GLOPA | <a href="https://www.vectorbase.org/download/glossina-pallidipes-iaeapeptidesgpali13fagz">https://www.vectorbase.org/download/glossina-pallidipes-iaeapeptidesgpali13fagz</a>                                                                                                                                                                                                                                                                              | v1.3   |
| <i>Glossina palpalis</i>     | GLOPL | <a href="https://www.vectorbase.org/download/glossina-palpalis-iaeapeptidesgpapi11fagz">https://www.vectorbase.org/download/glossina-palpalis-iaeapeptidesgpapi11fagz</a><br><a href="ftp://ftp.hgsc.bcm.edu/I5K-pilot/Sheep_blowfly/maker_annotation/version_0.5.3/L">ftp://ftp.hgsc.bcm.edu/I5K-pilot/Sheep_blowfly/maker_annotation/version_0.5.3/L</a>                                                                                                 | v1.1   |
| <i>Lucilia cuprina</i>       | LUCCU | CUP.faa                                                                                                                                                                                                                                                                                                                                                                                                                                                    | v0.5.3 |
| <i>Lutzomyia longipalpis</i> | LUTLO | <a href="https://www.vectorbase.org/download/lutzomyia-longipalpis-jacobinapeptidesllonj12fagz">https://www.vectorbase.org/download/lutzomyia-longipalpis-jacobinapeptidesllonj12fagz</a><br><a href="ftp://ftp.ncbi.nlm.nih.gov/genomes/all/GCA/000/149/185/GCA_000149185.1_Mdes_1.0/GCA_000149185.1_Mdes_1.0_genomic.fna.gz">ftp://ftp.ncbi.nlm.nih.gov/genomes/all/GCA/000/149/185/GCA_000149185.1_Mdes_1.0/GCA_000149185.1_Mdes_1.0_genomic.fna.gz</a> | v1.2   |
| <i>Mayetiola destructor</i>  | MAYDE | <a href="ftp://ftp.ensemblgenomes.org/pub/release-32/metazoa/fasta/megaselia_scalaris/pep/Megaselia_scalaris.Mscal1.pep.all.faa.gz">ftp://ftp.ensemblgenomes.org/pub/release-32/metazoa/fasta/megaselia_scalaris/pep/Megaselia_scalaris.Mscal1.pep.all.faa.gz</a>                                                                                                                                                                                          | v1.0   |
| <i>Megaselia scalaris</i>    | MEGSC | <a href="https://www.vectorbase.org/download/musca-domestica-aabyspeptidesmdoma11fagz">https://www.vectorbase.org/download/musca-domestica-aabyspeptidesmdoma11fagz</a>                                                                                                                                                                                                                                                                                    | v1     |
| <i>Musca domestica</i>       | MUSDO | <a href="https://www.vectorbase.org/download/phlebotomus-papatasi-israelpeptidesppapi12fagz">https://www.vectorbase.org/download/phlebotomus-papatasi-israelpeptidesppapi12fagz</a>                                                                                                                                                                                                                                                                        | v1.1   |
| <i>Phlebotomus papatasi</i>  | PHLPA | <a href="https://www.vectorbase.org/download/stomoxys-calcitrans-usdapeptidesscalu11fagz">https://www.vectorbase.org/download/stomoxys-calcitrans-usdapeptidesscalu11fagz</a>                                                                                                                                                                                                                                                                              | v1.2   |
| <i>Stomoxys calcitrans</i>   | STOCA | <a href="ftp://ftp.hgsc.bcm.edu/I5K-pilot/Mayfly/maker_annotation/version_0.5.3/EDAN.faa">ftp://ftp.hgsc.bcm.edu/I5K-pilot/Mayfly/maker_annotation/version_0.5.3/EDAN.faa</a>                                                                                                                                                                                                                                                                              | v1.1   |
| <i>Ephemera danica</i>       | EPHDA |                                                                                                                                                                                                                                                                                                                                                                                                                                                            | v0.5.3 |
| <i>Acyrtosiphon pisum</i>    | ACYPI | <a href="http://bipaa.genouest.org/data/public/a_pisum/ACYPIprot.faa.bz2">http://bipaa.genouest.org/data/public/a_pisum/ACYPIprot.faa.bz2</a><br><a href="ftp://ftp.hgsc.bcm.edu/I5K-pilot/Bed_bug/maker_annotation/version_0.5.3/CLEC.faa">ftp://ftp.hgsc.bcm.edu/I5K-pilot/Bed_bug/maker_annotation/version_0.5.3/CLEC.faa</a>                                                                                                                           | v1.0   |
| <i>Cimex lectularius</i>     | CIMLE | aa                                                                                                                                                                                                                                                                                                                                                                                                                                                         | v0.5.3 |

|                                |       |                                                                                                                                                                                                                                                                                                                                                                                                   |        |
|--------------------------------|-------|---------------------------------------------------------------------------------------------------------------------------------------------------------------------------------------------------------------------------------------------------------------------------------------------------------------------------------------------------------------------------------------------------|--------|
| <i>Diaphorina citri</i>        | DIACI | <a href="ftp://ftp.ncbi.nlm.nih.gov/genomes/all/GCF/000/475/195/GCF_000475195.1_Diaci_psyllid_genome_assembly_version_1.1/GCF_000475195.1_Diaci_psyllid_genome_assembly_version_1.1_protein.faa.gz">ftp://ftp.ncbi.nlm.nih.gov/genomes/all/GCF/000/475/195/GCF_000475195.1_Diaci_psyllid_genome_assembly_version_1.1/GCF_000475195.1_Diaci_psyllid_genome_assembly_version_1.1_protein.faa.gz</a> | v1.1   |
| <i>Gerris buenoi</i>           | GERBU | <a href="ftp://ftp.hgsc.bcm.edu/I5K-pilot/Water_strider/maker_annotation/version_0.5.3/GBUE.faa">ftp://ftp.hgsc.bcm.edu/I5K-pilot/Water_strider/maker_annotation/version_0.5.3/GBUE.faa</a>                                                                                                                                                                                                       | v0.5.3 |
| <i>Halyomorpha halys</i>       | HALHA | <a href="ftp://ftp.hgsc.bcm.edu/I5K-pilot/Brown_marmorated_stink_bug/maker_annotation/version_0.5.3/HHAL.faa">ftp://ftp.hgsc.bcm.edu/I5K-pilot/Brown_marmorated_stink_bug/maker_annotation/version_0.5.3/HHAL.faa</a>                                                                                                                                                                             | v0.5.3 |
| <i>Homalodisca vitripennis</i> | HOMVI | <a href="ftp://ftp.hgsc.bcm.edu/I5K-pilot/Glassy-winged_sharpshooter/maker_annotation/version_0.5.3/HVIT.faa">ftp://ftp.hgsc.bcm.edu/I5K-pilot/Glassy-winged_sharpshooter/maker_annotation/version_0.5.3/HVIT.faa</a>                                                                                                                                                                             | v0.5.3 |
| <i>Nilaparvata lugens</i>      | NILLU | <a href="ftp://climb.genomics.cn/pub/10.5524/100001_101000/100139/Nlug_v1.1.faa1.Nchange.pep.gz">ftp://climb.genomics.cn/pub/10.5524/100001_101000/100139/Nlug_v1.1.faa1.Nchange.pep.gz</a>                                                                                                                                                                                                       | v1.1   |
| <i>Oncopeltus fasciatus</i>    | ONCFA | <a href="ftp://ftp.hgsc.bcm.edu/I5K-pilot/Milkweed_bug/maker_annotation/version_0.5.3/OFAS.faa">ftp://ftp.hgsc.bcm.edu/I5K-pilot/Milkweed_bug/maker_annotation/version_0.5.3/OFAS.faa</a>                                                                                                                                                                                                         | v0.5.3 |
| <i>Pachypsylla venusta</i>     | PACVE | <a href="ftp://ftp.hgsc.bcm.edu/I5K-pilot/Hackberry_petiole_gall_psyllid/maker_annotation/version_0.5.3/PVEN.faa">ftp://ftp.hgsc.bcm.edu/I5K-pilot/Hackberry_petiole_gall_psyllid/maker_annotation/version_0.5.3/PVEN.faa</a>                                                                                                                                                                     | v0.5.3 |
| <i>Rhodnius prolixus</i>       | RHOPR | <a href="https://www.vectorbase.org/download/rhodnius-prolixus-cdcpeptidesrproc31fagz">https://www.vectorbase.org/download/rhodnius-prolixus-cdcpeptidesrproc31fagz</a>                                                                                                                                                                                                                           | v3.1   |
| <i>Acromyrmex echinator</i>    | ACREC | <a href="http://www.antgenomes.org/downloads/proteins/Acromyrmex_echinatior/Aech_v3.8.pep.faa.gz">http://www.antgenomes.org/downloads/proteins/Acromyrmex_echinatior/Aech_v3.8.pep.faa.gz</a>                                                                                                                                                                                                     | v3.8   |
| <i>Apis dorsata</i>            | APIDO | <a href="ftp://ftp.ncbi.nlm.nih.gov/genomes/Apis_dorsata/protein/Gnomon_prot.fsa.gz">ftp://ftp.ncbi.nlm.nih.gov/genomes/Apis_dorsata/protein/Gnomon_prot.fsa.gz</a>                                                                                                                                                                                                                               | v1.3   |
| <i>Apis florea</i>             | APIFL | <a href="ftp://ftp.ncbi.nlm.nih.gov/genomes/all/GCF/000/184/785/GCF_000184785.2_Aflo_1.0/GCF_000184785.2_Aflo_1.0_protein.faa.gz">ftp://ftp.ncbi.nlm.nih.gov/genomes/all/GCF/000/184/785/GCF_000184785.2_Aflo_1.0/GCF_000184785.2_Aflo_1.0_protein.faa.gz</a>                                                                                                                                     | v1.0   |
| <i>Apis mellifera</i>          | APIME | <a href="http://hymenopteragenome.org/drupal/sites/hymenopteragenome.org.beebase/files/dاتا/Amel_pre_release2_OGS_pep.faa.gz">http://hymenopteragenome.org/drupal/sites/hymenopteragenome.org.beebase/files/dاتا/Amel_pre_release2_OGS_pep.faa.gz</a>                                                                                                                                             | v2.0   |



|                                |       |                                                                                                                                                                                                                                                                                             |        |
|--------------------------------|-------|---------------------------------------------------------------------------------------------------------------------------------------------------------------------------------------------------------------------------------------------------------------------------------------------|--------|
| <i>Athalia rosae</i>           | ATHRO | <a href="ftp://ftp.ncbi.nlm.nih.gov/genomes/all/GCF/000/344/095/GCF_000344095.1_Aros_1.0/GCF_000344095.1_Aros_1.0_protein.faa.gz">ftp://ftp.ncbi.nlm.nih.gov/genomes/all/GCF/000/344/095/GCF_000344095.1_Aros_1.0/GCF_000344095.1_Aros_1.0_protein.faa.gz</a>                               | v1.0   |
| <i>Atta cephalotes</i>         | ATTCE | <a href="http://www.antgenomes.org/downloads/annotations/Atta_cephalotes/GCA_000143395.2_Acep_genomic.gff.gz">http://www.antgenomes.org/downloads/annotations/Atta_cephalotes/GCA_000143395.2_Acep_genomic.gff.gz</a>                                                                       | v1.2   |
| <i>Bombus impatiens</i>        | BOMIM | <a href="http://hymenopteragenome.org/beebase/sites/hymenopteragenome.org.beebase/files/data/consortium_data/Bombus_impatiens_v1.2.pep.faa.gz">http://hymenopteragenome.org/beebase/sites/hymenopteragenome.org.beebase/files/data/consortium_data/Bombus_impatiens_v1.2.pep.faa.gz</a>     | v1.2   |
| <i>Bombus terrestris</i>       | BOMTE | <a href="http://hymenopteragenome.org/beebase/sites/hymenopteragenome.org.beebase/files/data/consortium_data/Bombus_terrestris_v1.3.pep.faa.gz">http://hymenopteragenome.org/beebase/sites/hymenopteragenome.org.beebase/files/data/consortium_data/Bombus_terrestris_v1.3.pep.faa.gz</a>   | v1.3   |
| <i>Camponotus floridanus</i>   | CAMFL | <a href="http://www.antgenomes.org/downloads/annotations/Camponotus_floridanus/GCA_000147175.1_Cflo_genomic.gff.gz">http://www.antgenomes.org/downloads/annotations/Camponotus_floridanus/GCA_000147175.1_Cflo_genomic.gff.gz</a>                                                           | v3.3   |
| <i>Cardiocondyla obscurior</i> | CAROB | <a href="http://hymenopteragenome.org/drupal/sites/hymenopteragenome.org.ant_genomes.c Cardiocondyla/files/data/Cobs_1.4_OGS_proteins.faa.gz">http://hymenopteragenome.org/drupal/sites/hymenopteragenome.org.ant_genomes.c Cardiocondyla/files/data/Cobs_1.4_OGS_proteins.faa.gz</a>       | v1.4   |
| <i>Cephus cinctus</i>          | CEPCI | <a href="ftp://ftp.ncbi.nlm.nih.gov/genomes/all/GCF/000/341/935/GCF_000341935.1_Ccin1/GCF_000341935.1_Ccin1_protein.faa.gz">ftp://ftp.ncbi.nlm.nih.gov/genomes/all/GCF/000/341/935/GCF_000341935.1_Ccin1/GCF_000341935.1_Ccin1_protein.faa.gz</a>                                           | v1     |
| <i>Cerapachys biroi</i>        | CERBI | <a href="ftp://ftp.ncbi.nlm.nih.gov/genomes/all/GCF/000/611/835/GCF_000611835.1_CerBir1.0/GCF_000611835.1_CerBir1.0_protein.faa.gz">ftp://ftp.ncbi.nlm.nih.gov/genomes/all/GCF/000/611/835/GCF_000611835.1_CerBir1.0/GCF_000611835.1_CerBir1.0_protein.faa.gz</a>                           | v1.0   |
| <i>Ceratosolen solmsi</i>      | CERSO | <a href="http://www.insect-genome.com/data/genome_download/Ceratosolen_solmsi/Ceratosolen_solmsi_protein.fasta.gz">http://www.insect-genome.com/data/genome_download/Ceratosolen_solmsi/Ceratosolen_solmsi_protein.fasta.gz</a>                                                             | v1.0   |
| <i>Copidosoma floridanum</i>   | COPFL | <a href="ftp://ftp.hgsc.bcm.edu/I5K-pilot/Copidosoma_floridanum/maker_annotation/version_0.5.3/CFLO.faa">ftp://ftp.hgsc.bcm.edu/I5K-pilot/Copidosoma_floridanum/maker_annotation/version_0.5.3/CFLO.faa</a>                                                                                 | v0.5.3 |
| <i>Dufourea novaeangliae</i>   | DUFNO | <a href="http://hymenopteragenome.org/beebase/sites/hymenopteragenome.org.beebase/files/data/consortium_data/Dufourea_novaeangliae_v1.1.pep.faa">http://hymenopteragenome.org/beebase/sites/hymenopteragenome.org.beebase/files/data/consortium_data/Dufourea_novaeangliae_v1.1.pep.faa</a> | v1.1   |
| <i>Eufriesea mexicana</i>      | EUFME | <a href="http://hymenopteragenome.org/beebase/sites/hymenopteragenome.org.beebase/files/data/consortium_data/Eufriesea_mexicana_v1.1.pep.faa.gz">http://hymenopteragenome.org/beebase/sites/hymenopteragenome.org.beebase/files/data/consortium_data/Eufriesea_mexicana_v1.1.pep.faa.gz</a> | v1.1   |

|                                |       |                                                                                                                                                                                                                                                                                                       |        |
|--------------------------------|-------|-------------------------------------------------------------------------------------------------------------------------------------------------------------------------------------------------------------------------------------------------------------------------------------------------------|--------|
| <i>Fopius arisanus</i>         | FOPAR | <a href="ftp://ftp.ncbi.nlm.nih.gov/genomes/all/GCF/000/806/365/GCF_000806365.1_ASM80636v1/GCF_000806365.1_ASM80636v1_protein.faa.gz">ftp://ftp.ncbi.nlm.nih.gov/genomes/all/GCF/000/806/365/GCF_000806365.1_ASM80636v1/GCF_000806365.1_ASM80636v1_protein.faa.gz</a>                                 | v1.0   |
| <i>Habropoda laboriosa</i>     | HABLA | <a href="http://hymenopteragenome.org/beebase/sites/hymenopteragenome.org.beebase/files/data/consortium_data/Habropoda_laboriosa_v1.2.pep.faa.gz">http://hymenopteragenome.org/beebase/sites/hymenopteragenome.org.beebase/files/data/consortium_data/Habropoda_laboriosa_v1.2.pep.faa.gz</a>         | v1.2   |
| <i>Harpegnathos saltator</i>   | HARSA | <a href="http://www.antgenomes.org/downloads/annotations/Harpegnathos_saltator/GCA_000147195.1_Hsal_genomic.gff.gz">http://www.antgenomes.org/downloads/annotations/Harpegnathos_saltator/GCA_000147195.1_Hsal_genomic.gff.gz</a>                                                                     | v3.3   |
| <i>Linepithema humile</i>      | LINHU | <a href="http://www.antgenomes.org/downloads/annotations/Linepithema_humile/GCA_000217595.1_Lhum_genomic.gff.gz">http://www.antgenomes.org/downloads/annotations/Linepithema_humile/GCA_000217595.1_Lhum_genomic.gff.gz</a>                                                                           | v1.2   |
| <i>Megachile rotundata</i>     | MEGRO | <a href="http://hymenopteragenome.org/beebase/sites/hymenopteragenome.org.beebase/files/data/consortium_data/Megachile_rotundata_v1.1.pep.faa.gz">http://hymenopteragenome.org/beebase/sites/hymenopteragenome.org.beebase/files/data/consortium_data/Megachile_rotundata_v1.1.pep.faa.gz</a>         | v1.1   |
| <i>Melipona quadrifasciata</i> | MELQU | <a href="http://hymenopteragenome.org/beebase/sites/hymenopteragenome.org.beebase/files/data/consortium_data/Melipona_quadrifasciata_v1.1.pep.faa.gz">http://hymenopteragenome.org/beebase/sites/hymenopteragenome.org.beebase/files/data/consortium_data/Melipona_quadrifasciata_v1.1.pep.faa.gz</a> | v1.1   |
| <i>Microplitis demolitor</i>   | MICDE | <a href="ftp://ftp.ncbi.nlm.nih.gov/genomes/all/GCF/000/572/035/GCF_000572035.2_Mdem2/GCF_000572035.2_Mdem2_protein.faa.gz">ftp://ftp.ncbi.nlm.nih.gov/genomes/all/GCF/000/572/035/GCF_000572035.2_Mdem2/GCF_000572035.2_Mdem2_protein.faa.gz</a>                                                     | v2.0   |
| <i>Monomorium pharaonis</i>    | MONPH | <a href="ftp://ftp.ncbi.nlm.nih.gov/genomes/all/GCF/000/980/195/GCF_000980195.1_M.pharaonis_V2.0/GCF_000980195.1_M.pharaonis_V2.0_protein.faa.gz">ftp://ftp.ncbi.nlm.nih.gov/genomes/all/GCF/000/980/195/GCF_000980195.1_M.pharaonis_V2.0/GCF_000980195.1_M.pharaonis_V2.0_protein.faa.gz</a>         | v2.0   |
| <i>Nasonia vitripennis</i>     | NASVI | <a href="http://genomes.arc.georgetown.edu/nasonia/nasonia_genome_consortium/data/Nvit_OGSv1.2_pep.faa.gz">http://genomes.arc.georgetown.edu/nasonia/nasonia_genome_consortium/data/Nvit_OGSv1.2_pep.faa.gz</a>                                                                                       | v1.2   |
| <i>Orussus abietinus</i>       | ORUAB | <a href="ftp://ftp.hgsc.bcm.edu/I5K-pilot/Parasitic_wood_wasp/maker_annotation/version_0.5.3/OABI.faa">ftp://ftp.hgsc.bcm.edu/I5K-pilot/Parasitic_wood_wasp/maker_annotation/version_0.5.3/OABI.faa</a>                                                                                               | v0.5.3 |
| <i>Pogonomyrmex barbatus</i>   | POGBA | <a href="http://www.antgenomes.org/downloads/annotations/Pogonomyrmex_barbatus/GCA_000187915.1_Pbar_genomic.gff.gz">http://www.antgenomes.org/downloads/annotations/Pogonomyrmex_barbatus/GCA_000187915.1_Pbar_genomic.gff.gz</a>                                                                     | v1.2   |
| <i>Polistes dominula</i>       | POLDO | <a href="ftp://ftp.ncbi.nlm.nih.gov/genomes/all/GCF/001/465/965.1_Pdom_r1.2/GCF_001465965.1_Pdom_r1.2_protein.faa.gz">ftp://ftp.ncbi.nlm.nih.gov/genomes/all/GCF/001/465/965.1_Pdom_r1.2/GCF_001465965.1_Pdom_r1.2_protein.faa.gz</a>                                                                 | v1.2   |

|                                |       |                                                                                                                                                                                                                                                                                           |        |
|--------------------------------|-------|-------------------------------------------------------------------------------------------------------------------------------------------------------------------------------------------------------------------------------------------------------------------------------------------|--------|
| <i>Solenopsis invicta</i>      | SOLIN | <a href="http://www.antgenomes.org/downloads/genome/Solenopsis_invicta/GCA_000188075.1_Sinv_genomic.fna.gz">http://www.antgenomes.org/downloads/genome/Solenopsis_invicta/GCA_000188075.1_Sinv_genomic.fna.gz</a>                                                                         | v2.2.3 |
| <i>Trichogramma pretiosum</i>  | TRIPR | <a href="ftp://ftp.hgsc.bcm.edu/I5K-pilot/Trichogramma_pretiosum/maker_annotation/version_0.5.3/TPRE.faa">ftp://ftp.hgsc.bcm.edu/I5K-pilot/Trichogramma_pretiosum/maker_annotation/version_0.5.3/TPRE.faa</a>                                                                             | v0.5.3 |
| <i>Vollenhovia emeryi</i>      | VOLEM | <a href="ftp://ftp.ncbi.nlm.nih.gov/genomes/all/GCF/000/949/405/GCF_000949405.1_V.emery_V1.0/GCF_000949405.1_V.emery_V1.0_protein.faa.gz">ftp://ftp.ncbi.nlm.nih.gov/genomes/all/GCF/000/949/405/GCF_000949405.1_V.emery_V1.0/GCF_000949405.1_V.emery_V1.0_protein.faa.gz</a>             | v1.0   |
| <i>Wasmannia auropunctata</i>  | WASAU | <a href="ftp://ftp.ncbi.nlm.nih.gov/genomes/all/GCF/000/956/235/GCF_000956235.1_wasmannia.A_1.0/GCF_000956235.1_wasmannia.A_1.0_protein.faa.gz">ftp://ftp.ncbi.nlm.nih.gov/genomes/all/GCF/000/956/235/GCF_000956235.1_wasmannia.A_1.0/GCF_000956235.1_wasmannia.A_1.0_protein.faa.gz</a> | v1.0   |
| <i>Zootermopsis nevadensis</i> | ZOONE | <a href="http://termitegenome.org/sites/www.termitegenome.org/files/data/Znev/Znev.OGS.v2.2.pep.gz">http://termitegenome.org/sites/www.termitegenome.org/files/data/Znev/Znev.OGS.v2.2.pep.gz</a>                                                                                         | v2.2   |
| <i>Bombyx mori</i>             | BOMMO | <a href="http://silkworm.genomics.org.cn/silkdb/genome/">http://silkworm.genomics.org.cn/silkdb/genome/</a>                                                                                                                                                                               | v2.0   |
| <i>Danaus plexippus</i>        | DANPL | <a href="ftp.jgi-psf.org/pub/JGI_data/Daphnia_pulex/v1.0/Daphnia_pulex.fasta.gz">ftp.jgi-psf.org/pub/JGI_data/Daphnia_pulex/v1.0/Daphnia_pulex.fasta.gz</a>                                                                                                                               | v1     |
| <i>Heliconius melpomene</i>    | HELME | <a href="http://butterflygenome.org/sites/default/files/HelEraLat10.tar">http://butterflygenome.org/sites/default/files/HelEraLat10.tar</a>                                                                                                                                               | v1.1   |
| <i>Papilio polytes</i>         | PAPPO | <a href="http://papilio.bio.titech.ac.jp/genome-browser//download/pp/Ppolytes.v1.0.0.pep.faa.gz">http://papilio.bio.titech.ac.jp/genome-browser//download/pp/Ppolytes.v1.0.0.pep.faa.gz</a>                                                                                               | v1.0.0 |
| <i>Papilio xuthus</i>          | PAPXU | <a href="http://papilio.bio.titech.ac.jp/genome-browser//download/px/Pxuthus.v1.0.0.pep.faa.gz">http://papilio.bio.titech.ac.jp/genome-browser//download/px/Pxuthus.v1.0.0.pep.faa.gz</a>                                                                                                 | v1.0.0 |
| <i>Plutella xylostella</i>     | PLUXY | <a href="http://iae.fafu.edu.cn/DBM/data/DBM-DB.v1.0/Gene/P.xylostella.pep.fasta.tar.gz">http://iae.fafu.edu.cn/DBM/data/DBM-DB.v1.0/Gene/P.xylostella.pep.fasta.tar.gz</a>                                                                                                               | v1.0   |
| <i>Ladona fulva</i>            | LADFU | <a href="ftp://ftp.hgsc.bcm.edu/I5K-pilot/Scarce_Chaser/maker_annotation/version_0.5.3/LFUL.faa">ftp://ftp.hgsc.bcm.edu/I5K-pilot/Scarce_Chaser/maker_annotation/version_0.5.3/LFUL.faa</a>                                                                                               | v0.5.3 |
| <i>Locusta migratoria</i>      | LOCMI | <a href="http://159.226.67.243/index.html">http://159.226.67.243/index.html</a>                                                                                                                                                                                                           | v2.4   |

|                                   |       |                                                                                                                                                                                                                                                                           |            |
|-----------------------------------|-------|---------------------------------------------------------------------------------------------------------------------------------------------------------------------------------------------------------------------------------------------------------------------------|------------|
| <i>Timema cristinae</i>           | TIMCR | <a href="http://nosil-lab.group.shef.ac.uk/wp-content/uploads/data/timema_cristinae_draft_2014_gff_prots.tar.bz2">http://nosil-lab.group.shef.ac.uk/wp-content/uploads/data/timema_cristinae_draft_2014_gff_prots.tar.bz2</a>                                             | v1.0       |
| <i>Frankliniella occidentalis</i> | FRAOC | <a href="ftp://ftp.hgsc.bcm.edu/I5K-pilot/Western_flower_thrips/maker_annotation/version_0.5.3/FOCC.faa">ftp://ftp.hgsc.bcm.edu/I5K-pilot/Western_flower_thrips/maker_annotation/version_0.5.3/FOCC.faa</a>                                                               | v0.5.3     |
| <i>Limnephilus lunatus</i>        | LIMLU | <a href="ftp://ftp.hgsc.bcm.edu/I5K-pilot/Caddisfly/maker_annotation/version_0.5.3/LLUN.faa">ftp://ftp.hgsc.bcm.edu/I5K-pilot/Caddisfly/maker_annotation/version_0.5.3/LLUN.faa</a>                                                                                       | v0.5.3     |
| <i>Manduca sexta</i>              | MANSE | <a href="ftp://ftp.bioinformatics.ksu.edu/pub/Manduca/OGS2/OGS2_20140407_proteins.faa">ftp://ftp.bioinformatics.ksu.edu/pub/Manduca/OGS2/OGS2_20140407_proteins.faa</a>                                                                                                   | v1.0       |
| <i>belgica antarctica</i>         | BELNT | <a href="ftp://ftp.ensemblgenomes.org/pub/release-32/metazoa/fasta/belgica_antarctica/pep/">ftp://ftp.ensemblgenomes.org/pub/release-32/metazoa/fasta/belgica_antarctica/pep/</a>                                                                                         | release-32 |
| <i>Lasioglossum albipes</i>       | LASAL | <a href="http://hymenopteragenome.org/beebase/sites/hymenopteragenome.org.beebase/files/data/consortium_data/Lalb_OGS_v5.42.pep.faa.gz">http://hymenopteragenome.org/beebase/sites/hymenopteragenome.org.beebase/files/data/consortium_data/Lalb_OGS_v5.42.pep.faa.gz</a> | v5.42      |
| <i>Lerema accius</i>              | LERAC | <a href="http://prodata.swmed.edu/LepDB/lac/annotation_V1.1.tar.gz">http://prodata.swmed.edu/LepDB/lac/annotation_V1.1.tar.gz</a>                                                                                                                                         | V1.1       |
| <i>Melitaea cinxia</i>            | MELCI | <a href="ftp://ftp.ensemblgenomes.org/pub/metazoa/release-32/fasta/melitaea_cinxia/pep/">ftp://ftp.ensemblgenomes.org/pub/metazoa/release-32/fasta/melitaea_cinxia/pep/</a>                                                                                               | release-32 |
| <i>Centruroides exilicauda</i>    | CENCE | <a href="ftp://ftp.hgsc.bcm.edu/I5K-pilot/Bark_scorpion/maker_annotation/version_0.5.3/CS_CU.faa">ftp://ftp.hgsc.bcm.edu/I5K-pilot/Bark_scorpion/maker_annotation/version_0.5.3/CS_CU.faa</a>                                                                             | v0.5.3     |
| <i>Ixodes scapularis</i>          | IXOSC | <a href="ftp://ftp.ncbi.nlm.nih.gov/genomes/all/GCF_000208615.1_JCVI_ISG_i3_1.0/GCF_000208615.1_JCVI_ISG_i3_1.0_protein.faa.gz">ftp://ftp.ncbi.nlm.nih.gov/genomes/all/GCF_000208615.1_JCVI_ISG_i3_1.0/GCF_000208615.1_JCVI_ISG_i3_1.0_protein.faa.gz</a>                 | v1.0       |
| <i>Latrodectus hesperus</i>       | LATHE | <a href="ftp://ftp.hgsc.bcm.edu/I5K-pilot/Western_black_widow_spider/maker_annotation/version_0.5.3/LHES.faa">ftp://ftp.hgsc.bcm.edu/I5K-pilot/Western_black_widow_spider/maker_annotation/version_0.5.3/LHES.faa</a>                                                     | v0.5.3     |
| <i>Loxosceles reclusa</i>         | LOCRE | <a href="ftp://ftp.hgsc.bcm.edu/I5K-pilot/Brown_recluse_spider/maker_annotation/version_0.5.3/LREC.faa">ftp://ftp.hgsc.bcm.edu/I5K-pilot/Brown_recluse_spider/maker_annotation/version_0.5.3/LREC.faa</a>                                                                 | v0.5.3     |
| <i>Metaseiulus occidentalis</i>   | METOC | <a href="ftp://ftp.ncbi.nlm.nih.gov/genomes/all/GCF_000255335.1_Mocc_1.0/GCF_000255335.1_Mocc_1.0_protein.faa.gz">ftp://ftp.ncbi.nlm.nih.gov/genomes/all/GCF_000255335.1_Mocc_1.0/GCF_000255335.1_Mocc_1.0_protein.faa.gz</a>                                             | v1.0       |

Evolution of *SET* Genes in Insects

|                                  |       |                                                                                                                                                                                                            |        |
|----------------------------------|-------|------------------------------------------------------------------------------------------------------------------------------------------------------------------------------------------------------------|--------|
| <i>Parasteatoda tepidariorum</i> | PARTE | ftp://ftp.hgsc.bcm.edu/I5K-pilot/Common_house_spider/maker_annotation/version_0.5.3/PTEP.faa                                                                                                               | v0.5.3 |
| <i>Sarcoptes scabiei</i>         | SARSC | ftp://ftp.ncbi.nlm.nih.gov/genomes/all/GCA_000828355.1_SarSca1.0/GCA_000828355.1_SarSca1.0_protein.faa.gz                                                                                                  | v1.0   |
| <i>Stegodyphus mimosarum</i>     | STEMI | ftp://ftp.ncbi.nlm.nih.gov/genomes/all/GCA_000611955.2_Stegodyphus_mimosarum_v1/GCA_000611955.2_Stegodyphus_mimosarum_v1_protein.faa.gz                                                                    | v1.0   |
| <i>Tetranychus urticae</i>       | TETUR | ftp://ftp.ncbi.nlm.nih.gov/genomes/all/GCF_000239435.1_ASM23943v1/GCF_000239435.1_ASM23943v1_protein.faa.gz                                                                                                | v1.0   |
| <i>Daphnia magna</i>             | DAPMA | ftp://ftp.ncbi.nlm.nih.gov/genomes/all/GCA_001632505.1_daphmag2.4/GCA_001632505.1_daphmag2.4_protein.faa.gz                                                                                                | v2.4   |
| <i>Daphnia pulex</i>             | DAPPU | ftp://ftp.ncbi.nlm.nih.gov/genomes/all/GCA_001632505.1_daphmag2.4/GCA_001632505.1_daphmag2.4_protein.faa.gz                                                                                                | v1.0   |
| <i>Orchesella cincta</i>         | ORCCI | ftp://ftp.ncbi.nlm.nih.gov/genomes/all/GCA_001718145.1_ASM171814v1/GCA_001718145.1_ASM171814v1_protein.faa.gz                                                                                              | v1.0   |
| <i>Catajapyx aquilonaris</i>     | CATAQ | ftp://ftp.hgsc.bcm.edu/I5K-pilot/Silvestris_Northern_Forcepstail/maker_annotation/version_0.5.3/CAQU.faa                                                                                                   | v0.5.3 |
| <i>Hyalella azteca</i>           | HYAAZ | ftp://ftp.hgsc.bcm.edu/I5K-pilot/Hyalella_azteca/maker_annotation/version_0.5.3/HAZT.faa                                                                                                                   | v0.5.3 |
| <i>Eurytemora affinis</i>        | EURAF | ftp://ftp.hgsc.bcm.edu/I5K-pilot/Eurytemora_affinis/maker_annotation/version_0.5.3/EAFF.faa                                                                                                                | v0.5.3 |
| <i>Tigriopus californicus</i>    | TIGCA | https://i5k.nal.usda.gov/sites/default/files/data/Arthropoda/tigcal-%28Tigriopus_californicus%29/Current%20Genome%20Assembly/2.Official%20or%20Primary%20Gene%20Set/TCALIF_v1.0/TCALIF_proteins_v1.0.fasta | v1.0   |
| <i>Limulus polyphemus</i>        | LIMPO | ftp://ftp.ncbi.nlm.nih.gov/genomes/all/GCF_000517525.1_Limulus_polyphemus-2.1.2/GCF_000517525.1_Limulus_polyphemus-2.1.2_protein.faa.gz                                                                    | v2.1.2 |

**Supplementary Table S2. SET genes in the 147 arthropod genomes.**

| Accession  | Gene               | Group | Species                     |
|------------|--------------------|-------|-----------------------------|
| Aech_10783 | <i>ash1</i>        | Ash   | <i>Acromyrmex echinator</i> |
| Aech_04466 | <i>Blimp-1</i>     | PRDM  | <i>Acromyrmex echinator</i> |
| Aech_15148 | <i>egg</i>         | Suv   | <i>Acromyrmex echinator</i> |
| Aech_00633 | <i>Ez</i>          | Ez    | <i>Acromyrmex echinator</i> |
| Aech_09941 | <i>G9a</i>         | Suv   | <i>Acromyrmex echinator</i> |
| Aech_03970 | <i>Hmt4-20</i>     | -     | <i>Acromyrmex echinator</i> |
| Aech_09491 | <i>Mes-4</i>       | Ash   | <i>Acromyrmex echinator</i> |
| Aech_01065 | <i>Set1</i>        | Trx   | <i>Acromyrmex echinator</i> |
| Aech_11841 | <i>Set2</i>        | Ash   | <i>Acromyrmex echinator</i> |
| Aech_17307 | <i>Set8</i>        | -     | <i>Acromyrmex echinator</i> |
| Aech_05094 | <i>setd</i>        | SETD  | <i>Acromyrmex echinator</i> |
| Aech_05096 | <i>setd</i>        | SETD  | <i>Acromyrmex echinator</i> |
| Aech_06259 | <i>Smyd4-2</i>     | SMYD  | <i>Acromyrmex echinator</i> |
| Aech_04646 | <i>Smyd4-2</i>     | SMYD  | <i>Acromyrmex echinator</i> |
| Aech_03712 | <i>Smyd4-3</i>     | SMYD  | <i>Acromyrmex echinator</i> |
| Aech_06416 | <i>Smyd4-3</i>     | SMYD  | <i>Acromyrmex echinator</i> |
| Aech_10190 | <i>Smyd4-4</i>     | SMYD  | <i>Acromyrmex echinator</i> |
| Aech_07361 | <i>Smyd4-4</i>     | SMYD  | <i>Acromyrmex echinator</i> |
| Aech_08327 | <i>Smyd5</i>       | SMYD  | <i>Acromyrmex echinator</i> |
| Aech_01678 | <i>SmydA-3</i>     | SmydA | <i>Acromyrmex echinator</i> |
| Aech_01677 | <i>SmydA-4</i>     | SmydA | <i>Acromyrmex echinator</i> |
| Aech_14789 | <i>SmydA-5</i>     | SmydA | <i>Acromyrmex echinator</i> |
| Aech_02287 | <i>SmydA-8</i>     | SmydA | <i>Acromyrmex echinator</i> |
| Aech_15245 | <i>suv</i>         | Suv   | <i>Acromyrmex echinator</i> |
| Aech_05334 | <i>trr</i>         | Trx   | <i>Acromyrmex echinator</i> |
| Aech_04399 | <i>trx</i>         | Trx   | <i>Acromyrmex echinator</i> |
| Aech_02461 | <i>upSET(MLL5)</i> | -     | <i>Acromyrmex echinator</i> |
| ACYPI20513 | -                  | -     | <i>Acyrrhosiphon pisum</i>  |
| ACYPI23756 | -                  | -     | <i>Acyrrhosiphon pisum</i>  |
| ACYPI23949 | -                  | -     | <i>Acyrrhosiphon pisum</i>  |
| ACYPI25437 | -                  | -     | <i>Acyrrhosiphon pisum</i>  |
| ACYPI26657 | -                  | -     | <i>Acyrrhosiphon pisum</i>  |
| ACYPI27009 | -                  | -     | <i>Acyrrhosiphon pisum</i>  |
| ACYPI27763 | -                  | -     | <i>Acyrrhosiphon pisum</i>  |
| ACYPI28709 | -                  | -     | <i>Acyrrhosiphon pisum</i>  |
| ACYPI29273 | -                  | -     | <i>Acyrrhosiphon pisum</i>  |
| ACYPI29294 | -                  | -     | <i>Acyrrhosiphon pisum</i>  |
| ACYPI31177 | -                  | -     | <i>Acyrrhosiphon pisum</i>  |
| ACYPI36619 | -                  | -     | <i>Acyrrhosiphon pisum</i>  |
| ACYPI38782 | -                  | -     | <i>Acyrrhosiphon pisum</i>  |
| ACYPI40728 | -                  | -     | <i>Acyrrhosiphon pisum</i>  |
| ACYPI41724 | -                  | -     | <i>Acyrrhosiphon pisum</i>  |

|             |                   |       |                           |
|-------------|-------------------|-------|---------------------------|
| ACYPI41861  | -                 | -     | <i>Acyrtosiphon pisum</i> |
| ACYPI45428  | -                 | -     | <i>Acyrtosiphon pisum</i> |
| ACYPI45529  | -                 | -     | <i>Acyrtosiphon pisum</i> |
| ACYPI45729  | -                 | -     | <i>Acyrtosiphon pisum</i> |
| ACYPI45935  | -                 | -     | <i>Acyrtosiphon pisum</i> |
| ACYPI45936  | -                 | -     | <i>Acyrtosiphon pisum</i> |
| ACYPI55972  | -                 | -     | <i>Acyrtosiphon pisum</i> |
| ACYPI006399 | <i>ash1</i>       | Ash   | <i>Acyrtosiphon pisum</i> |
| ACYPI006306 | <i>egg</i>        | Suv   | <i>Acyrtosiphon pisum</i> |
| ACYPI003603 | <i>egg</i>        | Suv   | <i>Acyrtosiphon pisum</i> |
| ACYPI003919 | <i>egg</i>        | Suv   | <i>Acyrtosiphon pisum</i> |
| ACYPI006182 | <i>egg</i>        | Suv   | <i>Acyrtosiphon pisum</i> |
| ACYPI22783  | <i>egg</i>        | Suv   | <i>Acyrtosiphon pisum</i> |
| ACYPI009110 | <i>Ez</i>         | Ez    | <i>Acyrtosiphon pisum</i> |
| ACYPI010108 | <i>G9a</i>        | Suv   | <i>Acyrtosiphon pisum</i> |
| ACYPI000868 | <i>Hmt4-20</i>    | -     | <i>Acyrtosiphon pisum</i> |
| ACYPI008948 | <i>Hmt4-20</i>    | -     | <i>Acyrtosiphon pisum</i> |
| ACYPI27385  | <i>Hmt4-20</i>    | -     | <i>Acyrtosiphon pisum</i> |
| ACYPI28025  | <i>Hmt4-20</i>    | -     | <i>Acyrtosiphon pisum</i> |
| ACYPI49460  | <i>Hmt4-20</i>    | -     | <i>Acyrtosiphon pisum</i> |
| ACYPI000557 | <i>Set1</i>       | Trx   | <i>Acyrtosiphon pisum</i> |
| ACYPI26224  | <i>Set1</i>       | Trx   | <i>Acyrtosiphon pisum</i> |
| ACYPI008644 | <i>Set2</i>       | Ash   | <i>Acyrtosiphon pisum</i> |
| ACYPI002722 | <i>Set8</i>       | -     | <i>Acyrtosiphon pisum</i> |
| ACYPI004578 | <i>Smyd3</i>      | SMYD  | <i>Acyrtosiphon pisum</i> |
| ACYPI000531 | <i>Smyd4-3</i>    | SMYD  | <i>Acyrtosiphon pisum</i> |
| ACYPI001574 | <i>Smyd4-3</i>    | SMYD  | <i>Acyrtosiphon pisum</i> |
| ACYPI004606 | <i>Smyd4-3</i>    | SMYD  | <i>Acyrtosiphon pisum</i> |
| ACYPI23878  | <i>Smyd4-3</i>    | SMYD  | <i>Acyrtosiphon pisum</i> |
| ACYPI25513  | <i>Smyd4-3</i>    | SMYD  | <i>Acyrtosiphon pisum</i> |
| ACYPI26757  | <i>Smyd4-3</i>    | SMYD  | <i>Acyrtosiphon pisum</i> |
| ACYPI27467  | <i>Smyd4-3</i>    | SMYD  | <i>Acyrtosiphon pisum</i> |
| ACYPI33312  | <i>Smyd4-3</i>    | SMYD  | <i>Acyrtosiphon pisum</i> |
| ACYPI48770  | <i>Smyd4-3</i>    | SMYD  | <i>Acyrtosiphon pisum</i> |
| ACYPI52471  | <i>Smyd4-3</i>    | SMYD  | <i>Acyrtosiphon pisum</i> |
| ACYPI52915  | <i>Smyd4-3</i>    | SMYD  | <i>Acyrtosiphon pisum</i> |
| ACYPI55839  | <i>Smyd4-3</i>    | SMYD  | <i>Acyrtosiphon pisum</i> |
| ACYPI001927 | <i>Smyd5</i>      | SMYD  | <i>Acyrtosiphon pisum</i> |
| ACYPI001902 | <i>SmydA-5</i>    | SmydA | <i>Acyrtosiphon pisum</i> |
| ACYPI44442  | <i>SmydA-8</i>    | SmydA | <i>Acyrtosiphon pisum</i> |
| ACYPI002814 | <i>Su(var)3-9</i> | Suv   | <i>Acyrtosiphon pisum</i> |
| ACYPI003098 | <i>Su(var)3-9</i> | Suv   | <i>Acyrtosiphon pisum</i> |
| ACYPI006256 | <i>Su(var)3-9</i> | Suv   | <i>Acyrtosiphon pisum</i> |
| ACYPI56420  | <i>suv</i>        | Suv   | <i>Acyrtosiphon pisum</i> |

|             |                    |       |                           |
|-------------|--------------------|-------|---------------------------|
| ACYPI001043 | <i>trr</i>         | Trx   | <i>Acyrtosiphon pisum</i> |
| ACYPI007793 | <i>trx</i>         | Trx   | <i>Acyrtosiphon pisum</i> |
| ACYPI002785 | <i>upSET(MLL5)</i> | -     | <i>Acyrtosiphon pisum</i> |
| AAEL009666  | <i>ash1</i>        | Ash   | <i>Aedes aegypti</i>      |
| AAEL004255  | <i>Blimp-1</i>     | PRDM  | <i>Aedes aegypti</i>      |
| AAEL013770  | <i>Blimp-1</i>     | PRDM  | <i>Aedes aegypti</i>      |
| AAEL004290  | <i>egg</i>         | Suv   | <i>Aedes aegypti</i>      |
| AAEL013213  | <i>Ez</i>          | Ez    | <i>Aedes aegypti</i>      |
| AAEL012995  | <i>Ez</i>          | Ez    | <i>Aedes aegypti</i>      |
| AAEL008027  | <i>Hmt4-20</i>     | -     | <i>Aedes aegypti</i>      |
| AAEL010414  | <i>Mes-4</i>       | Ash   | <i>Aedes aegypti</i>      |
| AAEL010807  | <i>Set1</i>        | Trx   | <i>Aedes aegypti</i>      |
| AAEL006013  | <i>Set2</i>        | Ash   | <i>Aedes aegypti</i>      |
| AAEL000193  | <i>Set8</i>        | -     | <i>Aedes aegypti</i>      |
| AAEL007348  | <i>Smyd4-1</i>     | SMYD  | <i>Aedes aegypti</i>      |
| AAEL007346  | <i>Smyd4-1</i>     | SMYD  | <i>Aedes aegypti</i>      |
| AAEL001050  | <i>Smyd4-2</i>     | SMYD  | <i>Aedes aegypti</i>      |
| AAEL003516  | <i>Smyd4-3</i>     | SMYD  | <i>Aedes aegypti</i>      |
| AAEL003527  | <i>Smyd4-3</i>     | SMYD  | <i>Aedes aegypti</i>      |
| AAEL003992  | <i>Smyd4-4</i>     | SMYD  | <i>Aedes aegypti</i>      |
| AAEL003447  | <i>Smyd4-4</i>     | SMYD  | <i>Aedes aegypti</i>      |
| AAEL009454  | <i>Smyd4-4</i>     | SMYD  | <i>Aedes aegypti</i>      |
| AAEL011836  | <i>Smyd4-4</i>     | SMYD  | <i>Aedes aegypti</i>      |
| AAEL011838  | <i>Smyd4-4</i>     | SMYD  | <i>Aedes aegypti</i>      |
| AAEL000436  | <i>Smyd5</i>       | SMYD  | <i>Aedes aegypti</i>      |
| AAEL001936  | <i>SmydA-1</i>     | SmydA | <i>Aedes aegypti</i>      |
| AAEL003788  | <i>SmydA-2</i>     | SmydA | <i>Aedes aegypti</i>      |
| AAEL001857  | <i>SmydA-3</i>     | SmydA | <i>Aedes aegypti</i>      |
| AAEL001920  | <i>SmydA-4</i>     | SmydA | <i>Aedes aegypti</i>      |
| AAEL003295  | <i>SmydA-5</i>     | SmydA | <i>Aedes aegypti</i>      |
| AAEL009751  | <i>SmydA-6</i>     | SmydA | <i>Aedes aegypti</i>      |
| AAEL009757  | <i>SmydA-6</i>     | SmydA | <i>Aedes aegypti</i>      |
| AAEL008032  | <i>SmydA-8</i>     | SmydA | <i>Aedes aegypti</i>      |
| AAEL010826  | <i>Su(var)3-9</i>  | Suv   | <i>Aedes aegypti</i>      |
| AAEL005380  | <i>trr</i>         | Trx   | <i>Aedes aegypti</i>      |
| AAEL010578  | <i>trx</i>         | Trx   | <i>Aedes aegypti</i>      |
| AAEL001147  | <i>upSET(MLL5)</i> | -     | <i>Aedes aegypti</i>      |
| AALF019942  | -                  | -     | <i>Aedes albopictus</i>   |
| AALF028009  | <i>ash1</i>        | Ash   | <i>Aedes albopictus</i>   |
| AALF005153  | <i>ash1</i>        | Ash   | <i>Aedes albopictus</i>   |
| AALF013866  | <i>Blimp-1</i>     | PRDM  | <i>Aedes albopictus</i>   |
| AALF019168  | <i>Blimp-1</i>     | PRDM  | <i>Aedes albopictus</i>   |
| AALF001369  | <i>egg</i>         | Suv   | <i>Aedes albopictus</i>   |
| AALF015398  | <i>egg</i>         | Suv   | <i>Aedes albopictus</i>   |



|            |                    |       |                            |
|------------|--------------------|-------|----------------------------|
| AALF024803 | <i>Ez</i>          | Ez    | <i>Aedes albopictus</i>    |
| AALF014060 | <i>Hmt4-20</i>     | -     | <i>Aedes albopictus</i>    |
| AALF017377 | <i>Mes-4</i>       | Ash   | <i>Aedes albopictus</i>    |
| AALF005355 | <i>Set1</i>        | Trx   | <i>Aedes albopictus</i>    |
| AALF012083 | <i>Set2</i>        | Ash   | <i>Aedes albopictus</i>    |
| AALF020875 | <i>Set8</i>        | -     | <i>Aedes albopictus</i>    |
| AALF026593 | <i>Smyd4-1</i>     | SMYD  | <i>Aedes albopictus</i>    |
| AALF027384 | <i>Smyd4-2</i>     | SMYD  | <i>Aedes albopictus</i>    |
| AALF021455 | <i>Smyd4-3</i>     | SMYD  | <i>Aedes albopictus</i>    |
| AALF018911 | <i>Smyd4-4</i>     | SMYD  | <i>Aedes albopictus</i>    |
| AALF004458 | <i>Smyd4-4</i>     | SMYD  | <i>Aedes albopictus</i>    |
| AALF006249 | <i>Smyd4-4</i>     | SMYD  | <i>Aedes albopictus</i>    |
| AALF015442 | <i>Smyd4-4</i>     | SMYD  | <i>Aedes albopictus</i>    |
| AALF015443 | <i>Smyd4-4</i>     | SMYD  | <i>Aedes albopictus</i>    |
| AALF025730 | <i>Smyd4-4</i>     | SMYD  | <i>Aedes albopictus</i>    |
| AALF026554 | <i>Smyd4-4</i>     | SMYD  | <i>Aedes albopictus</i>    |
| AALF016668 | <i>Smyd5</i>       | SMYD  | <i>Aedes albopictus</i>    |
| AALF022548 | <i>Smyd5</i>       | SMYD  | <i>Aedes albopictus</i>    |
| AALF008460 | <i>SmydA-1</i>     | SmydA | <i>Aedes albopictus</i>    |
| AALF003791 | <i>SmydA-1</i>     | SmydA | <i>Aedes albopictus</i>    |
| AALF003405 | <i>SmydA-2</i>     | SmydA | <i>Aedes albopictus</i>    |
| AALF003793 | <i>SmydA-4</i>     | SmydA | <i>Aedes albopictus</i>    |
| AALF008462 | <i>SmydA-4</i>     | SmydA | <i>Aedes albopictus</i>    |
| AALF018336 | <i>SmydA-5</i>     | SmydA | <i>Aedes albopictus</i>    |
| AALF025243 | <i>SmydA-6</i>     | SmydA | <i>Aedes albopictus</i>    |
| AALF014059 | <i>SmydA-8</i>     | SmydA | <i>Aedes albopictus</i>    |
| AALF025991 | <i>Su(var)3-9</i>  | Suv   | <i>Aedes albopictus</i>    |
| AALF017609 | <i>trr</i>         | Trx   | <i>Aedes albopictus</i>    |
| AALF015214 | <i>trx</i>         | Trx   | <i>Aedes albopictus</i>    |
| AALF009731 | <i>trx</i>         | Trx   | <i>Aedes albopictus</i>    |
| AALF014731 | <i>upSET(MLL5)</i> | -     | <i>Aedes albopictus</i>    |
| APLA000918 | -                  | -     | <i>Agrilus planipennis</i> |
| APLA001309 | <i>ash1</i>        | Ash   | <i>Agrilus planipennis</i> |
| APLA008065 | <i>Blimp-1</i>     | PRDM  | <i>Agrilus planipennis</i> |
| APLA013892 | <i>Blimp-1</i>     | PRDM  | <i>Agrilus planipennis</i> |
| APLA000603 | <i>egg</i>         | Suv   | <i>Agrilus planipennis</i> |
| APLA013399 | <i>Ez</i>          | Ez    | <i>Agrilus planipennis</i> |
| APLA012795 | <i>Hmt4-20</i>     | -     | <i>Agrilus planipennis</i> |
| APLA003315 | <i>Mes-4</i>       | Ash   | <i>Agrilus planipennis</i> |
| APLA009436 | <i>Set1</i>        | Trx   | <i>Agrilus planipennis</i> |
| APLA003597 | <i>Set2</i>        | Ash   | <i>Agrilus planipennis</i> |
| APLA008756 | <i>Set8</i>        | -     | <i>Agrilus planipennis</i> |
| APLA014062 | <i>setd</i>        | SETD  | <i>Agrilus planipennis</i> |
| APLA012316 | <i>Smyd4-2</i>     | SMYD  | <i>Agrilus planipennis</i> |

|            |                    |       |                             |
|------------|--------------------|-------|-----------------------------|
| APLA006512 | <i>Smyd4-3</i>     | SMYD  | <i>Agrilus planipennis</i>  |
| APLA001020 | <i>Smyd4-4</i>     | SMYD  | <i>Agrilus planipennis</i>  |
| APLA010567 | <i>Smyd5</i>       | SMYD  | <i>Agrilus planipennis</i>  |
| APLA007169 | <i>SmydA-1</i>     | SmydA | <i>Agrilus planipennis</i>  |
| APLA012086 | <i>SmydA-3</i>     | SmydA | <i>Agrilus planipennis</i>  |
| APLA000387 | <i>SmydA-4</i>     | SmydA | <i>Agrilus planipennis</i>  |
| APLA005739 | <i>SmydA-5</i>     | SmydA | <i>Agrilus planipennis</i>  |
| APLA005059 | <i>SmydA-6</i>     | SmydA | <i>Agrilus planipennis</i>  |
| APLA007967 | <i>Su(var)3-9</i>  | Suv   | <i>Agrilus planipennis</i>  |
| APLA011917 | <i>suv</i>         | Suv   | <i>Agrilus planipennis</i>  |
| APLA009473 | <i>trr</i>         | Trx   | <i>Agrilus planipennis</i>  |
| APLA006438 | <i>trx</i>         | Trx   | <i>Agrilus planipennis</i>  |
| APLA012611 | <i>upSET(MLL5)</i> | -     | <i>Agrilus planipennis</i>  |
| AALB004147 | -                  | -     | <i>Anopheles albimanus</i>  |
| AALB009144 | <i>ash1</i>        | Ash   | <i>Anopheles albimanus</i>  |
| AALB005061 | <i>Blimp-1</i>     | PRDM  | <i>Anopheles albimanus</i>  |
| AALB000320 | <i>egg</i>         | Suv   | <i>Anopheles albimanus</i>  |
| AALB007836 | <i>Ez</i>          | Ez    | <i>Anopheles albimanus</i>  |
| AALB009123 | <i>G9a</i>         | Suv   | <i>Anopheles albimanus</i>  |
| AALB007777 | <i>Hmt4-20</i>     | -     | <i>Anopheles albimanus</i>  |
| AALB002890 | <i>Mes-4</i>       | Ash   | <i>Anopheles albimanus</i>  |
| AALB009646 | <i>Set1</i>        | Trx   | <i>Anopheles albimanus</i>  |
| AALB010325 | <i>Set2</i>        | Ash   | <i>Anopheles albimanus</i>  |
| AALB007539 | <i>Set8</i>        | -     | <i>Anopheles albimanus</i>  |
| AALB007130 | <i>setd</i>        | SETD  | <i>Anopheles albimanus</i>  |
| AALB000850 | <i>Smyd4-1</i>     | SMYD  | <i>Anopheles albimanus</i>  |
| AALB009107 | <i>Smyd4-2</i>     | SMYD  | <i>Anopheles albimanus</i>  |
| AALB010491 | <i>Smyd4-2</i>     | SMYD  | <i>Anopheles albimanus</i>  |
| AALB000467 | <i>Smyd4-3</i>     | SMYD  | <i>Anopheles albimanus</i>  |
| AALB010380 | <i>Smyd4-4</i>     | SMYD  | <i>Anopheles albimanus</i>  |
| AALB010372 | <i>Smyd4-4</i>     | SMYD  | <i>Anopheles albimanus</i>  |
| AALB002270 | <i>Smyd5</i>       | SMYD  | <i>Anopheles albimanus</i>  |
| AALB010154 | <i>SmydA-1</i>     | SmydA | <i>Anopheles albimanus</i>  |
| AALB007436 | <i>SmydA-1</i>     | SmydA | <i>Anopheles albimanus</i>  |
| AALB003310 | <i>SmydA-2</i>     | SmydA | <i>Anopheles albimanus</i>  |
| AALB010147 | <i>SmydA-4</i>     | SmydA | <i>Anopheles albimanus</i>  |
| AALB001224 | <i>SmydA-5</i>     | SmydA | <i>Anopheles albimanus</i>  |
| AALB001227 | <i>SmydA-6</i>     | SmydA | <i>Anopheles albimanus</i>  |
| AALB007778 | <i>SmydA-8</i>     | SmydA | <i>Anopheles albimanus</i>  |
| AALB008184 | <i>Su(var)3-9</i>  | Suv   | <i>Anopheles albimanus</i>  |
| AALB010678 | <i>trr</i>         | Trx   | <i>Anopheles albimanus</i>  |
| AALB009472 | <i>trx</i>         | Trx   | <i>Anopheles albimanus</i>  |
| AALB010198 | <i>upSET(MLL5)</i> | -     | <i>Anopheles albimanus</i>  |
| AARA001981 | <i>ash1</i>        | Ash   | <i>Anopheles arabiensis</i> |

|            |                    |       |                             |
|------------|--------------------|-------|-----------------------------|
| AARA008466 | <i>Blimp-1</i>     | PRDM  | <i>Anopheles arabiensis</i> |
| AARA005146 | <i>egg</i>         | Suv   | <i>Anopheles arabiensis</i> |
| AARA009882 | <i>Ez</i>          | Ez    | <i>Anopheles arabiensis</i> |
| AARA004840 | <i>G9a</i>         | Suv   | <i>Anopheles arabiensis</i> |
| AARA001140 | <i>Hmt4-20</i>     | -     | <i>Anopheles arabiensis</i> |
| AARA010201 | <i>Mes-4</i>       | Ash   | <i>Anopheles arabiensis</i> |
| AARA006692 | <i>Set1</i>        | Trx   | <i>Anopheles arabiensis</i> |
| AARA000494 | <i>Set2</i>        | Ash   | <i>Anopheles arabiensis</i> |
| AARA012095 | <i>Set8</i>        | -     | <i>Anopheles arabiensis</i> |
| AARA000873 | <i>setd</i>        | SETD  | <i>Anopheles arabiensis</i> |
| AARA009514 | <i>Smyd3</i>       | SMYD  | <i>Anopheles arabiensis</i> |
| AARA009535 | <i>Smyd4-1</i>     | SMYD  | <i>Anopheles arabiensis</i> |
| AARA004823 | <i>Smyd4-2</i>     | SMYD  | <i>Anopheles arabiensis</i> |
| AARA009380 | <i>Smyd4-3</i>     | SMYD  | <i>Anopheles arabiensis</i> |
| AARA000650 | <i>Smyd4-4</i>     | SMYD  | <i>Anopheles arabiensis</i> |
| AARA000156 | <i>Smyd4-4</i>     | SMYD  | <i>Anopheles arabiensis</i> |
| AARA000157 | <i>Smyd4-4</i>     | SMYD  | <i>Anopheles arabiensis</i> |
| AARA000158 | <i>Smyd4-4</i>     | SMYD  | <i>Anopheles arabiensis</i> |
| AARA000159 | <i>Smyd4-4</i>     | SMYD  | <i>Anopheles arabiensis</i> |
| AARA000160 | <i>Smyd4-4</i>     | SMYD  | <i>Anopheles arabiensis</i> |
| AARA000189 | <i>Smyd4-4</i>     | SMYD  | <i>Anopheles arabiensis</i> |
| AARA002920 | <i>Smyd4-4</i>     | SMYD  | <i>Anopheles arabiensis</i> |
| AARA006296 | <i>Smyd4-4</i>     | SMYD  | <i>Anopheles arabiensis</i> |
| AARA010547 | <i>Smyd4-4</i>     | SMYD  | <i>Anopheles arabiensis</i> |
| AARA006612 | <i>Smyd5</i>       | SMYD  | <i>Anopheles arabiensis</i> |
| AARA002766 | <i>SmydA-1</i>     | SmydA | <i>Anopheles arabiensis</i> |
| AARA011762 | <i>SmydA-2</i>     | SmydA | <i>Anopheles arabiensis</i> |
| AARA011975 | <i>SmydA-3</i>     | SmydA | <i>Anopheles arabiensis</i> |
| AARA002772 | <i>SmydA-4</i>     | SmydA | <i>Anopheles arabiensis</i> |
| AARA005867 | <i>SmydA-5</i>     | SmydA | <i>Anopheles arabiensis</i> |
| AARA005864 | <i>SmydA-6</i>     | SmydA | <i>Anopheles arabiensis</i> |
| AARA001141 | <i>SmydA-8</i>     | SmydA | <i>Anopheles arabiensis</i> |
| AARA006655 | <i>Su(var)3-9</i>  | Suv   | <i>Anopheles arabiensis</i> |
| AARA000113 | <i>trr</i>         | Trx   | <i>Anopheles arabiensis</i> |
| AARA004103 | <i>trx</i>         | Trx   | <i>Anopheles arabiensis</i> |
| AARA003322 | <i>upSET(MLL5)</i> | -     | <i>Anopheles arabiensis</i> |
| AATE001986 | <i>ash1</i>        | Ash   | <i>Anopheles atroparvus</i> |
| AATE010559 | <i>Blimp-1</i>     | PRDM  | <i>Anopheles atroparvus</i> |
| AATE010215 | <i>Blimp-1</i>     | PRDM  | <i>Anopheles atroparvus</i> |
| AATE010754 | <i>egg</i>         | Suv   | <i>Anopheles atroparvus</i> |
| AATE012517 | <i>Ez</i>          | Ez    | <i>Anopheles atroparvus</i> |
| AATE018312 | <i>G9a</i>         | Suv   | <i>Anopheles atroparvus</i> |
| AATE021144 | <i>Hmt4-20</i>     | -     | <i>Anopheles atroparvus</i> |
| AATE002579 | <i>Hmt4-20</i>     | -     | <i>Anopheles atroparvus</i> |

|            |                    |       |                             |
|------------|--------------------|-------|-----------------------------|
| AATE009362 | <i>Mes-4</i>       | Ash   | <i>Anopheles atroparvus</i> |
| AATE011750 | <i>Set1</i>        | Trx   | <i>Anopheles atroparvus</i> |
| AATE013785 | <i>Set2</i>        | Ash   | <i>Anopheles atroparvus</i> |
| AATE001322 | <i>Set8</i>        | -     | <i>Anopheles atroparvus</i> |
| AATE007609 | <i>setd</i>        | SETD  | <i>Anopheles atroparvus</i> |
| AATE012285 | <i>Smyd4-2</i>     | SMYD  | <i>Anopheles atroparvus</i> |
| AATE018332 | <i>Smyd4-3</i>     | SMYD  | <i>Anopheles atroparvus</i> |
| AATE018076 | <i>Smyd4-3</i>     | SMYD  | <i>Anopheles atroparvus</i> |
| AATE008287 | <i>Smyd4-4</i>     | SMYD  | <i>Anopheles atroparvus</i> |
| AATE010823 | <i>Smyd4-4</i>     | SMYD  | <i>Anopheles atroparvus</i> |
| AATE017046 | <i>Smyd5</i>       | SMYD  | <i>Anopheles atroparvus</i> |
| AATE014042 | <i>SmydA-1</i>     | SmydA | <i>Anopheles atroparvus</i> |
| AATE000280 | <i>SmydA-2</i>     | SmydA | <i>Anopheles atroparvus</i> |
| AATE020573 | <i>SmydA-4</i>     | SmydA | <i>Anopheles atroparvus</i> |
| AATE008651 | <i>SmydA-8</i>     | SmydA | <i>Anopheles atroparvus</i> |
| AATE007975 | <i>trr</i>         | Trx   | <i>Anopheles atroparvus</i> |
| AATE019914 | <i>trx</i>         | Trx   | <i>Anopheles atroparvus</i> |
| AATE015475 | <i>upSET(MLL5)</i> | -     | <i>Anopheles atroparvus</i> |
| ACHR004150 | <i>ash1</i>        | Ash   | <i>Anopheles christyi</i>   |
| ACHR005333 | <i>Blimp-1</i>     | PRDM  | <i>Anopheles christyi</i>   |
| ACHR003313 | <i>egg</i>         | Suv   | <i>Anopheles christyi</i>   |
| ACHR006274 | <i>Ez</i>          | Ez    | <i>Anopheles christyi</i>   |
| ACHR004732 | <i>G9a</i>         | Suv   | <i>Anopheles christyi</i>   |
| ACHR005184 | <i>Hmt4-20</i>     | -     | <i>Anopheles christyi</i>   |
| ACHR003025 | <i>Mes-4</i>       | Ash   | <i>Anopheles christyi</i>   |
| ACHR001688 | <i>Set1</i>        | Trx   | <i>Anopheles christyi</i>   |
| ACHR002893 | <i>Set2</i>        | Ash   | <i>Anopheles christyi</i>   |
| ACHR006197 | <i>Set8</i>        | -     | <i>Anopheles christyi</i>   |
| ACHR004534 | <i>setd</i>        | SETD  | <i>Anopheles christyi</i>   |
| ACHR009346 | <i>Smyd4-1</i>     | SMYD  | <i>Anopheles christyi</i>   |
| ACHR003333 | <i>Smyd4-2</i>     | SMYD  | <i>Anopheles christyi</i>   |
| ACHR003962 | <i>Smyd4-3</i>     | SMYD  | <i>Anopheles christyi</i>   |
| ACHR003961 | <i>Smyd4-3</i>     | SMYD  | <i>Anopheles christyi</i>   |
| ACHR003375 | <i>Smyd4-4</i>     | SMYD  | <i>Anopheles christyi</i>   |
| ACHR006505 | <i>Smyd4-4</i>     | SMYD  | <i>Anopheles christyi</i>   |
| ACHR008883 | <i>Smyd4-4</i>     | SMYD  | <i>Anopheles christyi</i>   |
| ACHR001476 | <i>Smyd5</i>       | SMYD  | <i>Anopheles christyi</i>   |
| ACHR002501 | <i>SmydA-1</i>     | SmydA | <i>Anopheles christyi</i>   |
| ACHR009347 | <i>SmydA-2</i>     | SmydA | <i>Anopheles christyi</i>   |
| ACHR006880 | <i>SmydA-3</i>     | SmydA | <i>Anopheles christyi</i>   |
| ACHR005153 | <i>SmydA-4</i>     | SmydA | <i>Anopheles christyi</i>   |
| ACHR000441 | <i>SmydA-5</i>     | SmydA | <i>Anopheles christyi</i>   |
| ACHR000444 | <i>SmydA-6</i>     | SmydA | <i>Anopheles christyi</i>   |
| ACHR001130 | <i>Su(var)3-9</i>  | Suv   | <i>Anopheles christyi</i>   |

|            |                    |       |                               |
|------------|--------------------|-------|-------------------------------|
| ACHR000033 | <i>trr</i>         | Trx   | <i>Anopheles christyi</i>     |
| ACHR000512 | <i>trx</i>         | Trx   | <i>Anopheles christyi</i>     |
| ACHR002873 | <i>upSET(MLL5)</i> | -     | <i>Anopheles christyi</i>     |
| ACOM022824 | -                  | -     | <i>Anopheles coluzzii</i>     |
| ACOM039862 | -                  | -     | <i>Anopheles coluzzii</i>     |
| ACOM034264 | <i>ash1</i>        | Ash   | <i>Anopheles coluzzii</i>     |
| ACOM039487 | <i>Blimp-1</i>     | PRDM  | <i>Anopheles coluzzii</i>     |
| ACOM030721 | <i>egg</i>         | Suv   | <i>Anopheles coluzzii</i>     |
| ACOM036272 | <i>Ez</i>          | Ez    | <i>Anopheles coluzzii</i>     |
| ACOM037293 | <i>G9a</i>         | Suv   | <i>Anopheles coluzzii</i>     |
| ACOM041819 | <i>Mes-4</i>       | Ash   | <i>Anopheles coluzzii</i>     |
| ACOM031842 | <i>Mes-4</i>       | Ash   | <i>Anopheles coluzzii</i>     |
| ACOM041980 | <i>Set1</i>        | Trx   | <i>Anopheles coluzzii</i>     |
| ACOM038701 | <i>Set8</i>        | -     | <i>Anopheles coluzzii</i>     |
| ACOM037868 | <i>setd</i>        | SETD  | <i>Anopheles coluzzii</i>     |
| ACOM040598 | <i>Smyd3</i>       | SMYD  | <i>Anopheles coluzzii</i>     |
| ACOM040545 | <i>Smyd4-1</i>     | SMYD  | <i>Anopheles coluzzii</i>     |
| ACOM037316 | <i>Smyd4-2</i>     | SMYD  | <i>Anopheles coluzzii</i>     |
| ACOM024367 | <i>Smyd4-3</i>     | SMYD  | <i>Anopheles coluzzii</i>     |
| ACOM024363 | <i>Smyd4-3</i>     | SMYD  | <i>Anopheles coluzzii</i>     |
| ACOM035881 | <i>Smyd4-3</i>     | SMYD  | <i>Anopheles coluzzii</i>     |
| ACOM032081 | <i>Smyd4-4</i>     | SMYD  | <i>Anopheles coluzzii</i>     |
| ACOM026706 | <i>Smyd4-4</i>     | SMYD  | <i>Anopheles coluzzii</i>     |
| ACOM026707 | <i>Smyd4-4</i>     | SMYD  | <i>Anopheles coluzzii</i>     |
| ACOM032704 | <i>Smyd4-4</i>     | SMYD  | <i>Anopheles coluzzii</i>     |
| ACOM034648 | <i>Smyd4-4</i>     | SMYD  | <i>Anopheles coluzzii</i>     |
| ACOM038104 | <i>Smyd4-4</i>     | SMYD  | <i>Anopheles coluzzii</i>     |
| ACOM038110 | <i>Smyd4-4</i>     | SMYD  | <i>Anopheles coluzzii</i>     |
| ACOM038111 | <i>Smyd4-4</i>     | SMYD  | <i>Anopheles coluzzii</i>     |
| ACOM028568 | <i>Smyd5</i>       | SMYD  | <i>Anopheles coluzzii</i>     |
| ACOM041370 | <i>SmydA-1</i>     | SmydA | <i>Anopheles coluzzii</i>     |
| ACOM038485 | <i>SmydA-2</i>     | SmydA | <i>Anopheles coluzzii</i>     |
| ACOM031027 | <i>SmydA-3</i>     | SmydA | <i>Anopheles coluzzii</i>     |
| ACOM041390 | <i>SmydA-4</i>     | SmydA | <i>Anopheles coluzzii</i>     |
| ACOM028644 | <i>Su(var)3-9</i>  | Suv   | <i>Anopheles coluzzii</i>     |
| ACOM038199 | <i>trr</i>         | Trx   | <i>Anopheles coluzzii</i>     |
| ACOM036432 | <i>trx</i>         | Trx   | <i>Anopheles coluzzii</i>     |
| ACOM026402 | <i>upSET(MLL5)</i> | -     | <i>Anopheles coluzzii</i>     |
| ACUA005703 | <i>ash1</i>        | Ash   | <i>Anopheles culicifacies</i> |
| ACUA020082 | <i>Blimp-1</i>     | PRDM  | <i>Anopheles culicifacies</i> |
| ACUA006607 | <i>egg</i>         | Suv   | <i>Anopheles culicifacies</i> |
| ACUA021465 | <i>Ez</i>          | Ez    | <i>Anopheles culicifacies</i> |
| ACUA002190 | <i>G9a</i>         | Suv   | <i>Anopheles culicifacies</i> |
| ACUA027774 | <i>Hmt4-20</i>     | -     | <i>Anopheles culicifacies</i> |

|            |                    |       |                               |
|------------|--------------------|-------|-------------------------------|
| ACUA005751 | <i>Mes-4</i>       | Ash   | <i>Anopheles culicifacies</i> |
| ACUA004163 | <i>Set1</i>        | Trx   | <i>Anopheles culicifacies</i> |
| ACUA013249 | <i>Set2</i>        | Ash   | <i>Anopheles culicifacies</i> |
| ACUA026085 | <i>Set8</i>        | -     | <i>Anopheles culicifacies</i> |
| ACUA024866 | <i>setd</i>        | SETD  | <i>Anopheles culicifacies</i> |
| ACUA001952 | <i>Smyd3</i>       | SMYD  | <i>Anopheles culicifacies</i> |
| ACUA002159 | <i>Smyd4-1</i>     | SMYD  | <i>Anopheles culicifacies</i> |
| ACUA005214 | <i>Smyd4-2</i>     | SMYD  | <i>Anopheles culicifacies</i> |
| ACUA004563 | <i>Smyd4-3</i>     | SMYD  | <i>Anopheles culicifacies</i> |
| ACUA002830 | <i>Smyd4-4</i>     | SMYD  | <i>Anopheles culicifacies</i> |
| ACUA001970 | <i>Smyd5</i>       | SMYD  | <i>Anopheles culicifacies</i> |
| ACUA015444 | <i>SmydA-1</i>     | SmydA | <i>Anopheles culicifacies</i> |
| ACUA012854 | <i>SmydA-2</i>     | SmydA | <i>Anopheles culicifacies</i> |
| ACUA016822 | <i>SmydA-3</i>     | SmydA | <i>Anopheles culicifacies</i> |
| ACUA007419 | <i>SmydA-4</i>     | SmydA | <i>Anopheles culicifacies</i> |
| ACUA010941 | <i>SmydA-5</i>     | SmydA | <i>Anopheles culicifacies</i> |
| ACUA017098 | <i>SmydA-6</i>     | SmydA | <i>Anopheles culicifacies</i> |
| ACUA019898 | <i>SmydA-8</i>     | SmydA | <i>Anopheles culicifacies</i> |
| ACUA002140 | <i>Su(var)3-9</i>  | Suv   | <i>Anopheles culicifacies</i> |
| ACUA015706 | <i>trr</i>         | Trx   | <i>Anopheles culicifacies</i> |
| ACUA018535 | <i>trx</i>         | Trx   | <i>Anopheles culicifacies</i> |
| ACUA010722 | <i>upSET(MLL5)</i> | -     | <i>Anopheles culicifacies</i> |
| ADAC005679 | -                  | -     | <i>Anopheles darlingi</i>     |
| ADAC005034 | <i>ash1</i>        | Ash   | <i>Anopheles darlingi</i>     |
| ADAC005262 | <i>Blimp-1</i>     | PRDM  | <i>Anopheles darlingi</i>     |
| ADAC006910 | <i>egg</i>         | Suv   | <i>Anopheles darlingi</i>     |
| ADAC009901 | <i>G9a</i>         | Suv   | <i>Anopheles darlingi</i>     |
| ADAC000673 | <i>Hmt4-20</i>     | -     | <i>Anopheles darlingi</i>     |
| ADAC004648 | <i>Mes-4</i>       | Ash   | <i>Anopheles darlingi</i>     |
| ADAC009677 | <i>Set1</i>        | Trx   | <i>Anopheles darlingi</i>     |
| ADAC001196 | <i>Set2</i>        | Ash   | <i>Anopheles darlingi</i>     |
| ADAC006491 | <i>Set8</i>        | -     | <i>Anopheles darlingi</i>     |
| ADAC000960 | <i>Smyd4-1</i>     | SMYD  | <i>Anopheles darlingi</i>     |
| ADAC009912 | <i>Smyd4-2</i>     | SMYD  | <i>Anopheles darlingi</i>     |
| ADAC002530 | <i>Smyd4-3</i>     | SMYD  | <i>Anopheles darlingi</i>     |
| ADAC002531 | <i>Smyd4-3</i>     | SMYD  | <i>Anopheles darlingi</i>     |
| ADAC000007 | <i>Smyd4-4</i>     | SMYD  | <i>Anopheles darlingi</i>     |
| ADAC002843 | <i>Smyd4-4</i>     | SMYD  | <i>Anopheles darlingi</i>     |
| ADAC000301 | <i>Smyd5</i>       | SMYD  | <i>Anopheles darlingi</i>     |
| ADAC007277 | <i>SmydA-1</i>     | SmydA | <i>Anopheles darlingi</i>     |
| ADAC000885 | <i>SmydA-1</i>     | SmydA | <i>Anopheles darlingi</i>     |
| ADAC008279 | <i>SmydA-2</i>     | SmydA | <i>Anopheles darlingi</i>     |
| ADAC003680 | <i>SmydA-4</i>     | SmydA | <i>Anopheles darlingi</i>     |
| ADAC006043 | <i>SmydA-5</i>     | SmydA | <i>Anopheles darlingi</i>     |

|            |                    |       |                             |
|------------|--------------------|-------|-----------------------------|
| ADAC006045 | <i>SmydA-6</i>     | SmydA | <i>Anopheles darlingi</i>   |
| ADAC000669 | <i>SmydA-8</i>     | SmydA | <i>Anopheles darlingi</i>   |
| ADAC003826 | <i>Su(var)3-9</i>  | Suv   | <i>Anopheles darlingi</i>   |
| ADAC008315 | <i>trr</i>         | Trx   | <i>Anopheles darlingi</i>   |
| ADAC008354 | <i>trx</i>         | Trx   | <i>Anopheles darlingi</i>   |
| ADAC003698 | <i>upSET(MLL5)</i> | -     | <i>Anopheles darlingi</i>   |
| ADIR009886 | <i>ash1</i>        | Ash   | <i>Anopheles dirus</i>      |
| ADIR007386 | <i>Blimp-1</i>     | PRDM  | <i>Anopheles dirus</i>      |
| ADIR010998 | <i>egg</i>         | Suv   | <i>Anopheles dirus</i>      |
| ADIR009828 | <i>Ez</i>          | Ez    | <i>Anopheles dirus</i>      |
| ADIR003112 | <i>G9a</i>         | Suv   | <i>Anopheles dirus</i>      |
| ADIR001253 | <i>Hmt4-20</i>     | -     | <i>Anopheles dirus</i>      |
| ADIR009088 | <i>Mes-4</i>       | Ash   | <i>Anopheles dirus</i>      |
| ADIR008928 | <i>Set1</i>        | Trx   | <i>Anopheles dirus</i>      |
| ADIR001842 | <i>Set2</i>        | Ash   | <i>Anopheles dirus</i>      |
| ADIR003903 | <i>Set8</i>        | -     | <i>Anopheles dirus</i>      |
| ADIR003127 | <i>Smyd4-2</i>     | SMYD  | <i>Anopheles dirus</i>      |
| ADIR002333 | <i>Smyd4-2</i>     | SMYD  | <i>Anopheles dirus</i>      |
| ADIR011385 | <i>Smyd4-3</i>     | SMYD  | <i>Anopheles dirus</i>      |
| ADIR002334 | <i>Smyd4-4</i>     | SMYD  | <i>Anopheles dirus</i>      |
| ADIR000001 | <i>Smyd4-4</i>     | SMYD  | <i>Anopheles dirus</i>      |
| ADIR000003 | <i>Smyd4-4</i>     | SMYD  | <i>Anopheles dirus</i>      |
| ADIR000068 | <i>Smyd4-4</i>     | SMYD  | <i>Anopheles dirus</i>      |
| ADIR001442 | <i>Smyd4-4</i>     | SMYD  | <i>Anopheles dirus</i>      |
| ADIR002342 | <i>Smyd4-4</i>     | SMYD  | <i>Anopheles dirus</i>      |
| ADIR011543 | <i>Smyd4-4</i>     | SMYD  | <i>Anopheles dirus</i>      |
| ADIR010677 | <i>Smyd5</i>       | SMYD  | <i>Anopheles dirus</i>      |
| ADIR000317 | <i>SmydA-1</i>     | SmydA | <i>Anopheles dirus</i>      |
| ADIR002369 | <i>SmydA-2</i>     | SmydA | <i>Anopheles dirus</i>      |
| ADIR000311 | <i>SmydA-4</i>     | SmydA | <i>Anopheles dirus</i>      |
| ADIR005591 | <i>SmydA-5</i>     | SmydA | <i>Anopheles dirus</i>      |
| ADIR005594 | <i>SmydA-6</i>     | SmydA | <i>Anopheles dirus</i>      |
| ADIR001254 | <i>SmydA-8</i>     | SmydA | <i>Anopheles dirus</i>      |
| ADIR002622 | <i>Su(var)3-9</i>  | Suv   | <i>Anopheles dirus</i>      |
| ADIR000099 | <i>trr</i>         | Trx   | <i>Anopheles dirus</i>      |
| ADIR009916 | <i>trx</i>         | Trx   | <i>Anopheles dirus</i>      |
| ADIR009538 | <i>upSET(MLL5)</i> | -     | <i>Anopheles dirus</i>      |
| AEPI006170 | <i>ash1</i>        | Ash   | <i>Anopheles epiroticus</i> |
| AEPI008254 | <i>Blimp-1</i>     | PRDM  | <i>Anopheles epiroticus</i> |
| AEPI004820 | <i>egg</i>         | Suv   | <i>Anopheles epiroticus</i> |
| AEPI010708 | <i>Ez</i>          | Ez    | <i>Anopheles epiroticus</i> |
| AEPI002277 | <i>G9a</i>         | Suv   | <i>Anopheles epiroticus</i> |
| AEPI008601 | <i>Hmt4-20</i>     | -     | <i>Anopheles epiroticus</i> |
| AEPI010018 | <i>Mes-4</i>       | Ash   | <i>Anopheles epiroticus</i> |

|            |                    |       |                             |
|------------|--------------------|-------|-----------------------------|
| AEPI004718 | <i>Set1</i>        | Trx   | <i>Anopheles epiroticus</i> |
| AEPI004533 | <i>Set2</i>        | Ash   | <i>Anopheles epiroticus</i> |
| AEPI004984 | <i>Set8</i>        | -     | <i>Anopheles epiroticus</i> |
| AEPI005413 | <i>setd</i>        | SETD  | <i>Anopheles epiroticus</i> |
| AEPI008133 | <i>Smyd3</i>       | SMYD  | <i>Anopheles epiroticus</i> |
| AEPI011149 | <i>Smyd4-1</i>     | SMYD  | <i>Anopheles epiroticus</i> |
| AEPI007491 | <i>Smyd4-2</i>     | SMYD  | <i>Anopheles epiroticus</i> |
| AEPI008125 | <i>Smyd4-3</i>     | SMYD  | <i>Anopheles epiroticus</i> |
| AEPI011500 | <i>Smyd4-4</i>     | SMYD  | <i>Anopheles epiroticus</i> |
| AEPI001344 | <i>Smyd4-4</i>     | SMYD  | <i>Anopheles epiroticus</i> |
| AEPI006916 | <i>Smyd4-4</i>     | SMYD  | <i>Anopheles epiroticus</i> |
| AEPI006256 | <i>Smyd5</i>       | SMYD  | <i>Anopheles epiroticus</i> |
| AEPI010529 | <i>SmydA-1</i>     | SmydA | <i>Anopheles epiroticus</i> |
| AEPI006589 | <i>SmydA-2</i>     | SmydA | <i>Anopheles epiroticus</i> |
| AEPI007725 | <i>SmydA-4</i>     | SmydA | <i>Anopheles epiroticus</i> |
| AEPI010927 | <i>SmydA-5</i>     | SmydA | <i>Anopheles epiroticus</i> |
| AEPI010929 | <i>SmydA-6</i>     | SmydA | <i>Anopheles epiroticus</i> |
| AEPI008602 | <i>SmydA-8</i>     | SmydA | <i>Anopheles epiroticus</i> |
| AEPI003432 | <i>Su(var)3-9</i>  | Suv   | <i>Anopheles epiroticus</i> |
| AEPI000069 | <i>trr</i>         | Trx   | <i>Anopheles epiroticus</i> |
| AEPI010594 | <i>trx</i>         | Trx   | <i>Anopheles epiroticus</i> |
| AEPI004325 | <i>upSET(MLL5)</i> | -     | <i>Anopheles epiroticus</i> |
| AFAF004540 | -                  | -     | <i>Anopheles farauti</i>    |
| AFAF012871 | <i>ash1</i>        | Ash   | <i>Anopheles farauti</i>    |
| AFAF006673 | <i>Blimp-1</i>     | PRDM  | <i>Anopheles farauti</i>    |
| AFAF000218 | <i>egg</i>         | Suv   | <i>Anopheles farauti</i>    |
| AFAF007019 | <i>Ez</i>          | Ez    | <i>Anopheles farauti</i>    |
| AFAF014974 | <i>G9a</i>         | Suv   | <i>Anopheles farauti</i>    |
| AFAF003732 | <i>Hmt4-20</i>     | -     | <i>Anopheles farauti</i>    |
| AFAF010905 | <i>Mes-4</i>       | Ash   | <i>Anopheles farauti</i>    |
| AFAF014140 | <i>Set1</i>        | Trx   | <i>Anopheles farauti</i>    |
| AFAF010271 | <i>Set2</i>        | Ash   | <i>Anopheles farauti</i>    |
| AFAF005239 | <i>Set8</i>        | -     | <i>Anopheles farauti</i>    |
| AFAF003061 | <i>setd</i>        | SETD  | <i>Anopheles farauti</i>    |
| AFAF016704 | <i>Smyd4-2</i>     | SMYD  | <i>Anopheles farauti</i>    |
| AFAF016027 | <i>Smyd4-3</i>     | SMYD  | <i>Anopheles farauti</i>    |
| AFAF020148 | <i>Smyd4-4</i>     | SMYD  | <i>Anopheles farauti</i>    |
| AFAF000640 | <i>Smyd4-4</i>     | SMYD  | <i>Anopheles farauti</i>    |
| AFAF002619 | <i>Smyd5</i>       | SMYD  | <i>Anopheles farauti</i>    |
| AFAF016575 | <i>SmydA-1</i>     | SmydA | <i>Anopheles farauti</i>    |
| AFAF014816 | <i>SmydA-2</i>     | SmydA | <i>Anopheles farauti</i>    |
| AFAF018626 | <i>SmydA-4</i>     | SmydA | <i>Anopheles farauti</i>    |
| AFAF005036 | <i>SmydA-8</i>     | SmydA | <i>Anopheles farauti</i>    |
| AFAF013256 | <i>Su(var)3-9</i>  | Suv   | <i>Anopheles farauti</i>    |



|            |                    |       |                           |
|------------|--------------------|-------|---------------------------|
| AFAF010066 | <i>trr</i>         | Trx   | <i>Anopheles farauti</i>  |
| AFAF016439 | <i>trx</i>         | Trx   | <i>Anopheles farauti</i>  |
| AFUN001211 | <i>ash1</i>        | Ash   | <i>Anopheles funestus</i> |
| AFUN007598 | <i>Blimp-1</i>     | PRDM  | <i>Anopheles funestus</i> |
| AFUN006312 | <i>egg</i>         | Suv   | <i>Anopheles funestus</i> |
| AFUN006519 | <i>Ez</i>          | Ez    | <i>Anopheles funestus</i> |
| AFUN007895 | <i>G9a</i>         | Suv   | <i>Anopheles funestus</i> |
| AFUN000188 | <i>Hmt4-20</i>     | -     | <i>Anopheles funestus</i> |
| AFUN004497 | <i>Mes-4</i>       | Ash   | <i>Anopheles funestus</i> |
| AFUN005553 | <i>Set1</i>        | Trx   | <i>Anopheles funestus</i> |
| AFUN001027 | <i>Set2</i>        | Ash   | <i>Anopheles funestus</i> |
| AFUN009140 | <i>Set8</i>        | -     | <i>Anopheles funestus</i> |
| AFUN006555 | <i>Smyd3</i>       | SMYD  | <i>Anopheles funestus</i> |
| AFUN011643 | <i>Smyd4-1</i>     | SMYD  | <i>Anopheles funestus</i> |
| AFUN007912 | <i>Smyd4-2</i>     | SMYD  | <i>Anopheles funestus</i> |
| AFUN000998 | <i>Smyd4-3</i>     | SMYD  | <i>Anopheles funestus</i> |
| AFUN002591 | <i>Smyd4-4</i>     | SMYD  | <i>Anopheles funestus</i> |
| AFUN002599 | <i>Smyd4-4</i>     | SMYD  | <i>Anopheles funestus</i> |
| AFUN011040 | <i>Smyd4-4</i>     | SMYD  | <i>Anopheles funestus</i> |
| AFUN011934 | <i>Smyd4-4</i>     | SMYD  | <i>Anopheles funestus</i> |
| AFUN008689 | <i>SmydA-1</i>     | SmydA | <i>Anopheles funestus</i> |
| AFUN008074 | <i>SmydA-2</i>     | SmydA | <i>Anopheles funestus</i> |
| AFUN002498 | <i>SmydA-4</i>     | SmydA | <i>Anopheles funestus</i> |
| AFUN002646 | <i>SmydA-5</i>     | SmydA | <i>Anopheles funestus</i> |
| AFUN002649 | <i>SmydA-6</i>     | SmydA | <i>Anopheles funestus</i> |
| AFUN000189 | <i>SmydA-8</i>     | SmydA | <i>Anopheles funestus</i> |
| AFUN008215 | <i>Su(var)3-9</i>  | Suv   | <i>Anopheles funestus</i> |
| AFUN009566 | <i>trr</i>         | Trx   | <i>Anopheles funestus</i> |
| AFUN009401 | <i>trx</i>         | Trx   | <i>Anopheles funestus</i> |
| AFUN005366 | <i>upSET(MLL5)</i> | -     | <i>Anopheles funestus</i> |
| AGAP010931 | -                  | -     | <i>Anopheles gambiae</i>  |
| AGAP001535 | <i>ash1</i>        | Ash   | <i>Anopheles gambiae</i>  |
| AGAP006592 | <i>Blimp-1</i>     | PRDM  | <i>Anopheles gambiae</i>  |
| AGAP007978 | <i>egg</i>         | Suv   | <i>Anopheles gambiae</i>  |
| AGAP012516 | <i>Ez</i>          | Ez    | <i>Anopheles gambiae</i>  |
| AGAP003013 | <i>G9a</i>         | Suv   | <i>Anopheles gambiae</i>  |
| AGAP000042 | <i>Hmt4-20</i>     | -     | <i>Anopheles gambiae</i>  |
| AGAP004656 | <i>Mes-4</i>       | Ash   | <i>Anopheles gambiae</i>  |
| AGAP002246 | <i>Set1</i>        | Trx   | <i>Anopheles gambiae</i>  |
| AGAP011688 | <i>Set2</i>        | Ash   | <i>Anopheles gambiae</i>  |
| AGAP012610 | <i>Set8</i>        | -     | <i>Anopheles gambiae</i>  |
| AGAP013401 | <i>setd</i>        | SETD  | <i>Anopheles gambiae</i>  |
| AGAP008954 | <i>Smyd3</i>       | SMYD  | <i>Anopheles gambiae</i>  |
| AGAP008973 | <i>Smyd4-1</i>     | SMYD  | <i>Anopheles gambiae</i>  |

|            |                    |       |                            |
|------------|--------------------|-------|----------------------------|
| AGAP002999 | <i>Smyd4-2</i>     | SMYD  | <i>Anopheles gambiae</i>   |
| AGAP008839 | <i>Smyd4-3</i>     | SMYD  | <i>Anopheles gambiae</i>   |
| AGAP008840 | <i>Smyd4-3</i>     | SMYD  | <i>Anopheles gambiae</i>   |
| AGAP011835 | <i>Smyd4-4</i>     | SMYD  | <i>Anopheles gambiae</i>   |
| AGAP000216 | <i>Smyd4-4</i>     | SMYD  | <i>Anopheles gambiae</i>   |
| AGAP005253 | <i>Smyd4-4</i>     | SMYD  | <i>Anopheles gambiae</i>   |
| AGAP009448 | <i>Smyd4-4</i>     | SMYD  | <i>Anopheles gambiae</i>   |
| AGAP009449 | <i>Smyd4-4</i>     | SMYD  | <i>Anopheles gambiae</i>   |
| AGAP011232 | <i>Smyd4-4</i>     | SMYD  | <i>Anopheles gambiae</i>   |
| AGAP011234 | <i>Smyd4-4</i>     | SMYD  | <i>Anopheles gambiae</i>   |
| AGAP011235 | <i>Smyd4-4</i>     | SMYD  | <i>Anopheles gambiae</i>   |
| AGAP011237 | <i>Smyd4-4</i>     | SMYD  | <i>Anopheles gambiae</i>   |
| AGAP011238 | <i>Smyd4-4</i>     | SMYD  | <i>Anopheles gambiae</i>   |
| AGAP011257 | <i>Smyd4-4</i>     | SMYD  | <i>Anopheles gambiae</i>   |
| AGAP011267 | <i>Smyd4-4</i>     | SMYD  | <i>Anopheles gambiae</i>   |
| AGAP012638 | <i>Smyd4-4</i>     | SMYD  | <i>Anopheles gambiae</i>   |
| AGAP003552 | <i>Smyd5</i>       | SMYD  | <i>Anopheles gambiae</i>   |
| AGAP011530 | <i>SmydA-1</i>     | SmydA | <i>Anopheles gambiae</i>   |
| AGAP001025 | <i>SmydA-2</i>     | SmydA | <i>Anopheles gambiae</i>   |
| AGAP007779 | <i>SmydA-3</i>     | SmydA | <i>Anopheles gambiae</i>   |
| AGAP011523 | <i>SmydA-4</i>     | SmydA | <i>Anopheles gambiae</i>   |
| AGAP010377 | <i>SmydA-6</i>     | SmydA | <i>Anopheles gambiae</i>   |
| AGAP000041 | <i>SmydA-8</i>     | SmydA | <i>Anopheles gambiae</i>   |
| AGAP003597 | <i>Su(var)3-9</i>  | Suv   | <i>Anopheles gambiae</i>   |
| AGAP011192 | <i>trr</i>         | Trx   | <i>Anopheles gambiae</i>   |
| AGAP002741 | <i>trx</i>         | Trx   | <i>Anopheles gambiae</i>   |
| AGAP012236 | <i>upSET(MLL5)</i> | -     | <i>Anopheles gambiae</i>   |
| AMAM002900 | -                  | -     | <i>Anopheles maculatus</i> |
| AMAM020763 | <i>ash1</i>        | Ash   | <i>Anopheles maculatus</i> |
| AMAM018700 | <i>Blimp-1</i>     | PRDM  | <i>Anopheles maculatus</i> |
| AMAM008031 | <i>Blimp-1</i>     | PRDM  | <i>Anopheles maculatus</i> |
| AMAM007096 | <i>egg</i>         | Suv   | <i>Anopheles maculatus</i> |
| AMAM005984 | <i>Ez</i>          | Ez    | <i>Anopheles maculatus</i> |
| AMAM015900 | <i>G9a</i>         | Suv   | <i>Anopheles maculatus</i> |
| AMAM006905 | <i>Hmt4-20</i>     | -     | <i>Anopheles maculatus</i> |
| AMAM017586 | <i>Mes-4</i>       | Ash   | <i>Anopheles maculatus</i> |
| AMAM021419 | <i>Set1</i>        | Trx   | <i>Anopheles maculatus</i> |
| AMAM001199 | <i>Set2</i>        | Ash   | <i>Anopheles maculatus</i> |
| AMAM020524 | <i>Set8</i>        | -     | <i>Anopheles maculatus</i> |
| AMAM001066 | <i>Smyd4-1</i>     | SMYD  | <i>Anopheles maculatus</i> |
| AMAM001162 | <i>Smyd4-2</i>     | SMYD  | <i>Anopheles maculatus</i> |
| AMAM018902 | <i>Smyd4-3</i>     | SMYD  | <i>Anopheles maculatus</i> |
| AMAM020244 | <i>Smyd4-3</i>     | SMYD  | <i>Anopheles maculatus</i> |
| AMAM007489 | <i>Smyd4-4</i>     | SMYD  | <i>Anopheles maculatus</i> |

|            |                    |       |                            |
|------------|--------------------|-------|----------------------------|
| AMAM022944 | <i>Smyd4-4</i>     | SMYD  | <i>Anopheles maculatus</i> |
| AMAM023423 | <i>Smyd5</i>       | SMYD  | <i>Anopheles maculatus</i> |
| AMAM005241 | <i>SmydA-1</i>     | SmydA | <i>Anopheles maculatus</i> |
| AMAM002801 | <i>SmydA-4</i>     | SmydA | <i>Anopheles maculatus</i> |
| AMAM017767 | <i>SmydA-5</i>     | SmydA | <i>Anopheles maculatus</i> |
| AMAM009817 | <i>SmydA-6</i>     | SmydA | <i>Anopheles maculatus</i> |
| AMAM020034 | <i>SmydA-8</i>     | SmydA | <i>Anopheles maculatus</i> |
| AMAM020583 | <i>Su(var)3-9</i>  | Suv   | <i>Anopheles maculatus</i> |
| AMAM007797 | <i>trr</i>         | Trx   | <i>Anopheles maculatus</i> |
| AMAM004679 | <i>trx</i>         | Trx   | <i>Anopheles maculatus</i> |
| AMAM000855 | <i>upSET(MLL5)</i> | -     | <i>Anopheles maculatus</i> |
| AMEC013710 | -                  | -     | <i>Anopheles melas</i>     |
| AMEC000956 | <i>ash1</i>        | Ash   | <i>Anopheles melas</i>     |
| AMEC005588 | <i>Blimp-1</i>     | PRDM  | <i>Anopheles melas</i>     |
| AMEC011999 | <i>egg</i>         | Suv   | <i>Anopheles melas</i>     |
| AMEC009964 | <i>Ez</i>          | Ez    | <i>Anopheles melas</i>     |
| AMEC018244 | <i>G9a</i>         | Suv   | <i>Anopheles melas</i>     |
| AMEC012967 | <i>Hmt4-20</i>     | -     | <i>Anopheles melas</i>     |
| AMEC010344 | <i>Set1</i>        | Trx   | <i>Anopheles melas</i>     |
| AMEC021762 | <i>Set8</i>        | -     | <i>Anopheles melas</i>     |
| AMEC002500 | <i>setd</i>        | SETD  | <i>Anopheles melas</i>     |
| AMEC010777 | <i>Smyd3</i>       | SMYD  | <i>Anopheles melas</i>     |
| AMEC002271 | <i>Smyd4-1</i>     | SMYD  | <i>Anopheles melas</i>     |
| AMEC008223 | <i>Smyd4-2</i>     | SMYD  | <i>Anopheles melas</i>     |
| AMEC006734 | <i>Smyd4-3</i>     | SMYD  | <i>Anopheles melas</i>     |
| AMEC015873 | <i>Smyd4-3</i>     | SMYD  | <i>Anopheles melas</i>     |
| AMEC020580 | <i>Smyd4-3</i>     | SMYD  | <i>Anopheles melas</i>     |
| AMEC018820 | <i>Smyd4-4</i>     | SMYD  | <i>Anopheles melas</i>     |
| AMEC002177 | <i>Smyd4-4</i>     | SMYD  | <i>Anopheles melas</i>     |
| AMEC003887 | <i>Smyd4-4</i>     | SMYD  | <i>Anopheles melas</i>     |
| AMEC007489 | <i>Smyd4-4</i>     | SMYD  | <i>Anopheles melas</i>     |
| AMEC009251 | <i>Smyd4-4</i>     | SMYD  | <i>Anopheles melas</i>     |
| AMEC010448 | <i>Smyd4-4</i>     | SMYD  | <i>Anopheles melas</i>     |
| AMEC018563 | <i>Smyd4-4</i>     | SMYD  | <i>Anopheles melas</i>     |
| AMEC019207 | <i>Smyd4-4</i>     | SMYD  | <i>Anopheles melas</i>     |
| AMEC011282 | <i>Smyd5</i>       | SMYD  | <i>Anopheles melas</i>     |
| AMEC014136 | <i>SmydA-1</i>     | SmydA | <i>Anopheles melas</i>     |
| AMEC001953 | <i>SmydA-2</i>     | SmydA | <i>Anopheles melas</i>     |
| AMEC017226 | <i>SmydA-3</i>     | SmydA | <i>Anopheles melas</i>     |
| AMEC007461 | <i>SmydA-4</i>     | SmydA | <i>Anopheles melas</i>     |
| AMEC017763 | <i>SmydA-8</i>     | SmydA | <i>Anopheles melas</i>     |
| AMEC005849 | <i>Su(var)3-9</i>  | Suv   | <i>Anopheles melas</i>     |
| AMEC016519 | <i>trr</i>         | Trx   | <i>Anopheles melas</i>     |
| AMEC012661 | <i>trx</i>         | Trx   | <i>Anopheles melas</i>     |

|            |                    |       |                          |
|------------|--------------------|-------|--------------------------|
| AMEC010292 | <i>upSET(MLL5)</i> | -     | <i>Anopheles melas</i>   |
| AMEM001699 | -                  | -     | <i>Anopheles merus</i>   |
| AMEM011814 | -                  | -     | <i>Anopheles merus</i>   |
| AMEM016754 | -                  | -     | <i>Anopheles merus</i>   |
| AMEM017977 | -                  | -     | <i>Anopheles merus</i>   |
| AMEM011678 | <i>ash1</i>        | Ash   | <i>Anopheles merus</i>   |
| AMEM000073 | <i>Blimp-1</i>     | PRDM  | <i>Anopheles merus</i>   |
| AMEM015377 | <i>egg</i>         | Suv   | <i>Anopheles merus</i>   |
| AMEM002929 | <i>G9a</i>         | Suv   | <i>Anopheles merus</i>   |
| AMEM008445 | <i>Hmt4-20</i>     | -     | <i>Anopheles merus</i>   |
| AMEM012160 | <i>Mes-4</i>       | Ash   | <i>Anopheles merus</i>   |
| AMEM010011 | <i>Set1</i>        | Trx   | <i>Anopheles merus</i>   |
| AMEM016351 | <i>Set2</i>        | Ash   | <i>Anopheles merus</i>   |
| AMEM001840 | <i>Set8</i>        | -     | <i>Anopheles merus</i>   |
| AMEM016838 | <i>setd</i>        | SETD  | <i>Anopheles merus</i>   |
| AMEM017677 | <i>Smyd3</i>       | SMYD  | <i>Anopheles merus</i>   |
| AMEM006609 | <i>Smyd4-1</i>     | SMYD  | <i>Anopheles merus</i>   |
| AMEM017156 | <i>Smyd4-2</i>     | SMYD  | <i>Anopheles merus</i>   |
| AMEM003006 | <i>Smyd4-3</i>     | SMYD  | <i>Anopheles merus</i>   |
| AMEM016185 | <i>Smyd4-3</i>     | SMYD  | <i>Anopheles merus</i>   |
| AMEM007139 | <i>Smyd4-4</i>     | SMYD  | <i>Anopheles merus</i>   |
| AMEM000956 | <i>Smyd4-4</i>     | SMYD  | <i>Anopheles merus</i>   |
| AMEM001976 | <i>Smyd4-4</i>     | SMYD  | <i>Anopheles merus</i>   |
| AMEM004974 | <i>Smyd4-4</i>     | SMYD  | <i>Anopheles merus</i>   |
| AMEM006937 | <i>Smyd4-4</i>     | SMYD  | <i>Anopheles merus</i>   |
| AMEM007787 | <i>Smyd4-4</i>     | SMYD  | <i>Anopheles merus</i>   |
| AMEM009150 | <i>Smyd4-4</i>     | SMYD  | <i>Anopheles merus</i>   |
| AMEM011685 | <i>Smyd4-4</i>     | SMYD  | <i>Anopheles merus</i>   |
| AMEM016083 | <i>Smyd4-4</i>     | SMYD  | <i>Anopheles merus</i>   |
| AMEM004690 | <i>Smyd5</i>       | SMYD  | <i>Anopheles merus</i>   |
| AMEM017633 | <i>SmydA-1</i>     | SmydA | <i>Anopheles merus</i>   |
| AMEM005030 | <i>SmydA-2</i>     | SmydA | <i>Anopheles merus</i>   |
| AMEM004977 | <i>SmydA-3</i>     | SmydA | <i>Anopheles merus</i>   |
| AMEM008766 | <i>SmydA-4</i>     | SmydA | <i>Anopheles merus</i>   |
| AMEM005433 | <i>SmydA-8</i>     | SmydA | <i>Anopheles merus</i>   |
| AMEM015759 | <i>Su(var)3-9</i>  | Suv   | <i>Anopheles merus</i>   |
| AMEM009860 | <i>trr</i>         | Trx   | <i>Anopheles merus</i>   |
| AMIN002426 | <i>ash1</i>        | Ash   | <i>Anopheles minimus</i> |
| AMIN007801 | <i>Blimp-1</i>     | PRDM  | <i>Anopheles minimus</i> |
| AMIN006287 | <i>egg</i>         | Suv   | <i>Anopheles minimus</i> |
| AMIN007508 | <i>Ez</i>          | Ez    | <i>Anopheles minimus</i> |
| AMIN003720 | <i>G9a</i>         | Suv   | <i>Anopheles minimus</i> |
| AMIN002103 | <i>Hmt4-20</i>     | -     | <i>Anopheles minimus</i> |
| AMIN000101 | <i>Mes-4</i>       | Ash   | <i>Anopheles minimus</i> |

|            |                    |       |                                  |
|------------|--------------------|-------|----------------------------------|
| AMIN000158 | <i>Set1</i>        | Trx   | <i>Anopheles minimus</i>         |
| AMIN008770 | <i>Set2</i>        | Ash   | <i>Anopheles minimus</i>         |
| AMIN006460 | <i>Set8</i>        | -     | <i>Anopheles minimus</i>         |
| AMIN008001 | <i>setd</i>        | SETD  | <i>Anopheles minimus</i>         |
| AMIN009400 | <i>Smyd3</i>       | SMYD  | <i>Anopheles minimus</i>         |
| AMIN009414 | <i>Smyd4-1</i>     | SMYD  | <i>Anopheles minimus</i>         |
| AMIN003703 | <i>Smyd4-2</i>     | SMYD  | <i>Anopheles minimus</i>         |
| AMIN001595 | <i>Smyd4-3</i>     | SMYD  | <i>Anopheles minimus</i>         |
| AMIN004343 | <i>Smyd4-4</i>     | SMYD  | <i>Anopheles minimus</i>         |
| AMIN006792 | <i>Smyd4-4</i>     | SMYD  | <i>Anopheles minimus</i>         |
| AMIN007057 | <i>Smyd4-4</i>     | SMYD  | <i>Anopheles minimus</i>         |
| AMIN008359 | <i>Smyd4-4</i>     | SMYD  | <i>Anopheles minimus</i>         |
| AMIN000845 | <i>Smyd5</i>       | SMYD  | <i>Anopheles minimus</i>         |
| AMIN004523 | <i>SmydA-1</i>     | SmydA | <i>Anopheles minimus</i>         |
| AMIN005380 | <i>SmydA-2</i>     | SmydA | <i>Anopheles minimus</i>         |
| AMIN009066 | <i>SmydA-4</i>     | SmydA | <i>Anopheles minimus</i>         |
| AMIN006575 | <i>SmydA-5</i>     | SmydA | <i>Anopheles minimus</i>         |
| AMIN006572 | <i>SmydA-6</i>     | SmydA | <i>Anopheles minimus</i>         |
| AMIN002102 | <i>SmydA-8</i>     | SmydA | <i>Anopheles minimus</i>         |
| AMIN000200 | <i>Su(var)3-9</i>  | Suv   | <i>Anopheles minimus</i>         |
| AMIN008387 | <i>trr</i>         | Trx   | <i>Anopheles minimus</i>         |
| AMIN003572 | <i>trx</i>         | Trx   | <i>Anopheles minimus</i>         |
| AMIN006931 | <i>upSET(MLL5)</i> | -     | <i>Anopheles minimus</i>         |
| AQUA000404 | <i>ash1</i>        | Ash   | <i>Anopheles quadriannulatus</i> |
| AQUA004699 | <i>Blimp-1</i>     | PRDM  | <i>Anopheles quadriannulatus</i> |
| AQUA000686 | <i>egg</i>         | Suv   | <i>Anopheles quadriannulatus</i> |
| AQUA008909 | <i>Ez</i>          | Ez    | <i>Anopheles quadriannulatus</i> |
| AQUA000150 | <i>G9a</i>         | Suv   | <i>Anopheles quadriannulatus</i> |
| AQUA003948 | <i>Hmt4-20</i>     | -     | <i>Anopheles quadriannulatus</i> |
| AQUA004809 | <i>Mes-4</i>       | Ash   | <i>Anopheles quadriannulatus</i> |
| AQUA004272 | <i>Set1</i>        | Trx   | <i>Anopheles quadriannulatus</i> |
| AQUA010424 | <i>Set2</i>        | Ash   | <i>Anopheles quadriannulatus</i> |
| AQUA011894 | <i>Set8</i>        | -     | <i>Anopheles quadriannulatus</i> |
| AQUA011555 | <i>Smyd3</i>       | SMYD  | <i>Anopheles quadriannulatus</i> |
| AQUA002276 | <i>Smyd4-1</i>     | SMYD  | <i>Anopheles quadriannulatus</i> |
| AQUA000168 | <i>Smyd4-2</i>     | SMYD  | <i>Anopheles quadriannulatus</i> |
| AQUA007881 | <i>Smyd4-3</i>     | SMYD  | <i>Anopheles quadriannulatus</i> |
| AQUA009048 | <i>Smyd4-4</i>     | SMYD  | <i>Anopheles quadriannulatus</i> |
| AQUA006091 | <i>Smyd4-4</i>     | SMYD  | <i>Anopheles quadriannulatus</i> |
| AQUA006092 | <i>Smyd4-4</i>     | SMYD  | <i>Anopheles quadriannulatus</i> |
| AQUA006117 | <i>Smyd4-4</i>     | SMYD  | <i>Anopheles quadriannulatus</i> |
| AQUA007251 | <i>Smyd4-4</i>     | SMYD  | <i>Anopheles quadriannulatus</i> |
| AQUA009729 | <i>Smyd4-4</i>     | SMYD  | <i>Anopheles quadriannulatus</i> |
| AQUA011953 | <i>Smyd4-4</i>     | SMYD  | <i>Anopheles quadriannulatus</i> |

|            |                    |       |                                  |
|------------|--------------------|-------|----------------------------------|
| AQUA011962 | <i>Smyd4-4</i>     | SMYD  | <i>Anopheles quadriannulatus</i> |
| AQUA011963 | <i>Smyd4-4</i>     | SMYD  | <i>Anopheles quadriannulatus</i> |
| AQUA011967 | <i>Smyd4-4</i>     | SMYD  | <i>Anopheles quadriannulatus</i> |
| AQUA001660 | <i>Smyd5</i>       | SMYD  | <i>Anopheles quadriannulatus</i> |
| AQUA007380 | <i>SmydA-1</i>     | SmydA | <i>Anopheles quadriannulatus</i> |
| AQUA010849 | <i>SmydA-2</i>     | SmydA | <i>Anopheles quadriannulatus</i> |
| AQUA003637 | <i>SmydA-3</i>     | SmydA | <i>Anopheles quadriannulatus</i> |
| AQUA007386 | <i>SmydA-4</i>     | SmydA | <i>Anopheles quadriannulatus</i> |
| AQUA006709 | <i>SmydA-5</i>     | SmydA | <i>Anopheles quadriannulatus</i> |
| AQUA006712 | <i>SmydA-6</i>     | SmydA | <i>Anopheles quadriannulatus</i> |
| AQUA003949 | <i>SmydA-8</i>     | SmydA | <i>Anopheles quadriannulatus</i> |
| AQUA001617 | <i>Su(var)3-9</i>  | Suv   | <i>Anopheles quadriannulatus</i> |
| AQUA005076 | <i>trr</i>         | Trx   | <i>Anopheles quadriannulatus</i> |
| AQUA006747 | <i>trx</i>         | Trx   | <i>Anopheles quadriannulatus</i> |
| AQUA002891 | <i>upSET(MLL5)</i> | -     | <i>Anopheles quadriannulatus</i> |
| ASIS001853 | <i>ash1</i>        | Ash   | <i>Anopheles sinensis</i>        |
| ASIS005657 | <i>Blimp-1</i>     | PRDM  | <i>Anopheles sinensis</i>        |
| ASIS000823 | <i>egg</i>         | Suv   | <i>Anopheles sinensis</i>        |
| ASIS004256 | <i>Ez</i>          | Ez    | <i>Anopheles sinensis</i>        |
| ASIS008043 | <i>G9a</i>         | Suv   | <i>Anopheles sinensis</i>        |
| ASIS002039 | <i>Mes-4</i>       | Ash   | <i>Anopheles sinensis</i>        |
| ASIS019895 | <i>Set1</i>        | Trx   | <i>Anopheles sinensis</i>        |
| ASIS014568 | <i>Set8</i>        | -     | <i>Anopheles sinensis</i>        |
| ASIS003741 | <i>setd</i>        | SETD  | <i>Anopheles sinensis</i>        |
| ASIS016123 | <i>Smyd4-1</i>     | SMYD  | <i>Anopheles sinensis</i>        |
| ASIS023491 | <i>Smyd4-2</i>     | SMYD  | <i>Anopheles sinensis</i>        |
| ASIS011359 | <i>Smyd4-2</i>     | SMYD  | <i>Anopheles sinensis</i>        |
| ASIS014752 | <i>Smyd4-3</i>     | SMYD  | <i>Anopheles sinensis</i>        |
| ASIS005116 | <i>Smyd4-4</i>     | SMYD  | <i>Anopheles sinensis</i>        |
| ASIS003292 | <i>Smyd5</i>       | SMYD  | <i>Anopheles sinensis</i>        |
| ASIS007463 | <i>SmydA-1</i>     | SmydA | <i>Anopheles sinensis</i>        |
| ASIS008940 | <i>SmydA-5</i>     | SmydA | <i>Anopheles sinensis</i>        |
| ASIS012008 | <i>SmydA-8</i>     | SmydA | <i>Anopheles sinensis</i>        |
| ASIS023794 | <i>trr</i>         | Trx   | <i>Anopheles sinensis</i>        |
| ASIS003703 | <i>trx</i>         | Trx   | <i>Anopheles sinensis</i>        |
| ASTEI06781 | -                  | -     | <i>Anopheles stephensi</i>       |
| ASTEI10920 | -                  | -     | <i>Anopheles stephensi</i>       |
| ASTEI05450 | <i>ash1</i>        | Ash   | <i>Anopheles stephensi</i>       |
| ASTEI02700 | <i>Blimp-1</i>     | PRDM  | <i>Anopheles stephensi</i>       |
| ASTEI01744 | <i>egg</i>         | Suv   | <i>Anopheles stephensi</i>       |
| ASTEI11490 | <i>Ez</i>          | Ez    | <i>Anopheles stephensi</i>       |
| ASTEI03292 | <i>G9a</i>         | Suv   | <i>Anopheles stephensi</i>       |
| ASTEI01247 | <i>Hmt4-20</i>     | -     | <i>Anopheles stephensi</i>       |
| ASTEI06936 | <i>Mes-4</i>       | Ash   | <i>Anopheles stephensi</i>       |

|            |                    |       |                                 |
|------------|--------------------|-------|---------------------------------|
| ASTEI03436 | <i>Set1</i>        | Trx   | <i>Anopheles stephensi</i>      |
| ASTEI08574 | <i>Set2</i>        | Ash   | <i>Anopheles stephensi</i>      |
| ASTEI06658 | <i>Set8</i>        | -     | <i>Anopheles stephensi</i>      |
| ASTEI00369 | <i>setd</i>        | SETD  | <i>Anopheles stephensi</i>      |
| ASTEI01947 | <i>Smyd3</i>       | SMYD  | <i>Anopheles stephensi</i>      |
| ASTEI01959 | <i>Smyd4-1</i>     | SMYD  | <i>Anopheles stephensi</i>      |
| ASTEI03277 | <i>Smyd4-2</i>     | SMYD  | <i>Anopheles stephensi</i>      |
| ASTEI05014 | <i>Smyd4-3</i>     | SMYD  | <i>Anopheles stephensi</i>      |
| ASTEI05013 | <i>Smyd4-3</i>     | SMYD  | <i>Anopheles stephensi</i>      |
| ASTEI05052 | <i>Smyd4-4</i>     | SMYD  | <i>Anopheles stephensi</i>      |
| ASTEI11197 | <i>Smyd4-4</i>     | SMYD  | <i>Anopheles stephensi</i>      |
| ASTEI04392 | <i>Smyd5</i>       | SMYD  | <i>Anopheles stephensi</i>      |
| ASTEI03856 | <i>SmydA-1</i>     | SmydA | <i>Anopheles stephensi</i>      |
| ASTEI03536 | <i>SmydA-2</i>     | SmydA | <i>Anopheles stephensi</i>      |
| ASTEI10159 | <i>SmydA-4</i>     | SmydA | <i>Anopheles stephensi</i>      |
| ASTEI06743 | <i>SmydA-5</i>     | SmydA | <i>Anopheles stephensi</i>      |
| ASTEI06740 | <i>SmydA-6</i>     | SmydA | <i>Anopheles stephensi</i>      |
| ASTEI01245 | <i>SmydA-8</i>     | SmydA | <i>Anopheles stephensi</i>      |
| ASTEI04355 | <i>Su(var)3-9</i>  | Suv   | <i>Anopheles stephensi</i>      |
| ASTEI06814 | <i>trr</i>         | Trx   | <i>Anopheles stephensi</i>      |
| ASTEI03164 | <i>trx</i>         | Trx   | <i>Anopheles stephensi</i>      |
| ASTEI02464 | <i>upSET(MLL5)</i> | -     | <i>Anopheles stephensi</i>      |
| AGLA002233 | -                  | -     | <i>Anoplophora glabripennis</i> |
| AGLA006133 | <i>ash1</i>        | Ash   | <i>Anoplophora glabripennis</i> |
| AGLA005605 | <i>Blimp-1</i>     | PRDM  | <i>Anoplophora glabripennis</i> |
| AGLA021199 | <i>Blimp-1</i>     | PRDM  | <i>Anoplophora glabripennis</i> |
| AGLA015578 | <i>egg</i>         | Suv   | <i>Anoplophora glabripennis</i> |
| AGLA010746 | <i>Ez</i>          | Ez    | <i>Anoplophora glabripennis</i> |
| AGLA007097 | <i>Ez</i>          | Ez    | <i>Anoplophora glabripennis</i> |
| AGLA011365 | <i>G9a</i>         | Suv   | <i>Anoplophora glabripennis</i> |
| AGLA005255 | <i>Hmt4-20</i>     | -     | <i>Anoplophora glabripennis</i> |
| AGLA005108 | <i>Mes-4</i>       | Ash   | <i>Anoplophora glabripennis</i> |
| AGLA012456 | <i>Set1</i>        | Trx   | <i>Anoplophora glabripennis</i> |
| AGLA007361 | <i>Set2</i>        | Ash   | <i>Anoplophora glabripennis</i> |
| AGLA013595 | <i>Set8</i>        | -     | <i>Anoplophora glabripennis</i> |
| AGLA013594 | <i>Set8</i>        | -     | <i>Anoplophora glabripennis</i> |
| AGLA000708 | <i>setd</i>        | SETD  | <i>Anoplophora glabripennis</i> |
| AGLA005231 | <i>Smyd3</i>       | SMYD  | <i>Anoplophora glabripennis</i> |
| AGLA012467 | <i>Smyd4-1</i>     | SMYD  | <i>Anoplophora glabripennis</i> |
| AGLA008638 | <i>Smyd4-2</i>     | SMYD  | <i>Anoplophora glabripennis</i> |
| AGLA021486 | <i>Smyd4-2</i>     | SMYD  | <i>Anoplophora glabripennis</i> |
| AGLA000223 | <i>Smyd4-3</i>     | SMYD  | <i>Anoplophora glabripennis</i> |
| AGLA005552 | <i>Smyd4-4</i>     | SMYD  | <i>Anoplophora glabripennis</i> |
| AGLA021705 | <i>Smyd5</i>       | SMYD  | <i>Anoplophora glabripennis</i> |

|                |                    |       |                                 |
|----------------|--------------------|-------|---------------------------------|
| AGLA001654     | <i>SmydA-1</i>     | SmydA | <i>Anoplophora glabripennis</i> |
| AGLA001655     | <i>SmydA-4</i>     | SmydA | <i>Anoplophora glabripennis</i> |
| AGLA001231     | <i>SmydA-5</i>     | SmydA | <i>Anoplophora glabripennis</i> |
| AGLA001385     | <i>suv</i>         | Suv   | <i>Anoplophora glabripennis</i> |
| AGLA005070     | <i>trr</i>         | Trx   | <i>Anoplophora glabripennis</i> |
| AGLA000269     | <i>trx</i>         | Trx   | <i>Anoplophora glabripennis</i> |
| XP_006612780.1 | <i>ash1</i>        | Ash   | <i>Apis dorsata</i>             |
| XP_006621322.1 | <i>Blimp-1</i>     | PRDM  | <i>Apis dorsata</i>             |
| XP_006608998.1 | <i>egg</i>         | Suv   | <i>Apis dorsata</i>             |
| XP_006607899.1 | <i>Ez</i>          | Ez    | <i>Apis dorsata</i>             |
| XP_006614809.1 | <i>G9a</i>         | Suv   | <i>Apis dorsata</i>             |
| XP_006622888.1 | <i>Hmt4-20</i>     | -     | <i>Apis dorsata</i>             |
| XP_006607919.1 | <i>Mes-4</i>       | Ash   | <i>Apis dorsata</i>             |
| XP_006613374.1 | <i>Set1</i>        | Trx   | <i>Apis dorsata</i>             |
| XP_006608686.1 | <i>Set2</i>        | Ash   | <i>Apis dorsata</i>             |
| XP_006617682.1 | <i>Set8</i>        | -     | <i>Apis dorsata</i>             |
| XP_006610749.1 | <i>Smyd4-1</i>     | SMYD  | <i>Apis dorsata</i>             |
| XP_006622927.1 | <i>Smyd4-2</i>     | SMYD  | <i>Apis dorsata</i>             |
| XP_006622175.1 | <i>Smyd4-3</i>     | SMYD  | <i>Apis dorsata</i>             |
| XP_006622829.1 | <i>Smyd4-3</i>     | SMYD  | <i>Apis dorsata</i>             |
| XP_006619877.1 | <i>Smyd4-4</i>     | SMYD  | <i>Apis dorsata</i>             |
| XP_006608248.1 | <i>Smyd5</i>       | SMYD  | <i>Apis dorsata</i>             |
| XP_006615710.1 | <i>SmydA-3</i>     | SmydA | <i>Apis dorsata</i>             |
| XP_006615709.1 | <i>SmydA-4</i>     | SmydA | <i>Apis dorsata</i>             |
| XP_006618220.1 | <i>SmydA-5</i>     | SmydA | <i>Apis dorsata</i>             |
| XP_006612041.1 | <i>SmydA-8</i>     | SmydA | <i>Apis dorsata</i>             |
| XP_006620530.1 | <i>Su(var)3-9</i>  | Suv   | <i>Apis dorsata</i>             |
| XP_006609855.1 | <i>upSET(MLL5)</i> | -     | <i>Apis dorsata</i>             |
| XP_012343597.1 | <i>ash1</i>        | Ash   | <i>Apis florea</i>              |
| XP_012346985.1 | <i>Blimp-1</i>     | PRDM  | <i>Apis florea</i>              |
| XP_012348733.1 | <i>egg</i>         | Suv   | <i>Apis florea</i>              |
| XP_003698603.1 | <i>G9a</i>         | Suv   | <i>Apis florea</i>              |
| XP_003696886.1 | <i>Hmt4-20</i>     | -     | <i>Apis florea</i>              |
| XP_012348612.1 | <i>Mes-4</i>       | Ash   | <i>Apis florea</i>              |
| XP_003690574.1 | <i>Set1</i>        | Trx   | <i>Apis florea</i>              |
| XP_012341488.1 | <i>Set2</i>        | Ash   | <i>Apis florea</i>              |
| XP_012344335.1 | <i>Set8</i>        | -     | <i>Apis florea</i>              |
| XP_003691619.1 | <i>setd</i>        | SETD  | <i>Apis florea</i>              |
| XP_012350926.1 | <i>Smyd4-2</i>     | SMYD  | <i>Apis florea</i>              |
| XP_012348137.1 | <i>Smyd4-2</i>     | SMYD  | <i>Apis florea</i>              |
| XP_003691021.1 | <i>Smyd4-3</i>     | SMYD  | <i>Apis florea</i>              |
| XP_012349534.1 | <i>Smyd4-3</i>     | SMYD  | <i>Apis florea</i>              |
| XP_003694793.1 | <i>Smyd4-4</i>     | SMYD  | <i>Apis florea</i>              |
| XP_012342066.1 | <i>Smyd4-4</i>     | SMYD  | <i>Apis florea</i>              |



|                |                    |       |                       |
|----------------|--------------------|-------|-----------------------|
| XP_003692172.1 | <i>Smyd5</i>       | SMYD  | <i>Apis florea</i>    |
| XP_003693098.2 | <i>SmydA-1</i>     | SmydA | <i>Apis florea</i>    |
| XP_003695189.1 | <i>SmydA-3</i>     | SmydA | <i>Apis florea</i>    |
| XP_003695192.1 | <i>SmydA-4</i>     | SmydA | <i>Apis florea</i>    |
| XP_003697129.1 | <i>SmydA-5</i>     | SmydA | <i>Apis florea</i>    |
| XP_003695246.1 | <i>SmydA-8</i>     | SmydA | <i>Apis florea</i>    |
| XP_012347907.1 | <i>Su(var)3-9</i>  | Suv   | <i>Apis florea</i>    |
| XP_012347592.1 | <i>trx</i>         | Trx   | <i>Apis florea</i>    |
| XP_012342729.1 | <i>upSET(MLL5)</i> | -     | <i>Apis florea</i>    |
| GB11034        | -                  | -     | <i>Apis mellifera</i> |
| GB12658        | <i>ash1</i>        | Ash   | <i>Apis mellifera</i> |
| GB11750        | <i>Blimp-1</i>     | PRDM  | <i>Apis mellifera</i> |
| GB17661        | <i>egg</i>         | Suv   | <i>Apis mellifera</i> |
| GB15558        | <i>Ez</i>          | Ez    | <i>Apis mellifera</i> |
| GB18236        | <i>G9a</i>         | Suv   | <i>Apis mellifera</i> |
| GB19385        | <i>Hmt4-20</i>     | -     | <i>Apis mellifera</i> |
| GB15744        | <i>Set1</i>        | Trx   | <i>Apis mellifera</i> |
| GB10605        | <i>Set2</i>        | Ash   | <i>Apis mellifera</i> |
| GB15534        | <i>Set2</i>        | Ash   | <i>Apis mellifera</i> |
| GB15777        | <i>Set8</i>        | -     | <i>Apis mellifera</i> |
| GB14294        | <i>setd</i>        | SETD  | <i>Apis mellifera</i> |
| GB16596        | <i>Smyd4-2</i>     | SMYD  | <i>Apis mellifera</i> |
| GB19743        | <i>Smyd4-2</i>     | SMYD  | <i>Apis mellifera</i> |
| GB11612        | <i>Smyd4-3</i>     | SMYD  | <i>Apis mellifera</i> |
| GB17686        | <i>Smyd4-4</i>     | SMYD  | <i>Apis mellifera</i> |
| GB15540        | <i>Smyd4-4</i>     | SMYD  | <i>Apis mellifera</i> |
| GB15657        | <i>Smyd4-4</i>     | SMYD  | <i>Apis mellifera</i> |
| GB13751        | <i>Smyd5</i>       | SMYD  | <i>Apis mellifera</i> |
| GB14592        | <i>SmydA-1</i>     | SmydA | <i>Apis mellifera</i> |
| GB12331        | <i>SmydA-3</i>     | SmydA | <i>Apis mellifera</i> |
| GB17689        | <i>SmydA-4</i>     | SmydA | <i>Apis mellifera</i> |
| GB10954        | <i>SmydA-5</i>     | SmydA | <i>Apis mellifera</i> |
| GB17649        | <i>SmydA-8</i>     | SmydA | <i>Apis mellifera</i> |
| GB30073        | <i>Su(var)3-9</i>  | Suv   | <i>Apis mellifera</i> |
| GB13240        | <i>suv</i>         | Suv   | <i>Apis mellifera</i> |
| GB19436        | <i>trr</i>         | Trx   | <i>Apis mellifera</i> |
| GB16330        | <i>trx</i>         | Trx   | <i>Apis mellifera</i> |
| GB16847        | <i>upSET(MLL5)</i> | -     | <i>Apis mellifera</i> |
| XP_012267274.1 | -                  | -     | <i>Athalia rosae</i>  |
| XP_012250907.1 | <i>Blimp-1</i>     | PRDM  | <i>Athalia rosae</i>  |
| XP_012262309.1 | <i>Blimp-1</i>     | PRDM  | <i>Athalia rosae</i>  |
| XP_012269296.1 | <i>Ez</i>          | Ez    | <i>Athalia rosae</i>  |
| XP_012253973.1 | <i>G9a</i>         | Suv   | <i>Athalia rosae</i>  |
| XP_012264648.1 | <i>Hmt4-20</i>     | -     | <i>Athalia rosae</i>  |

|                |                   |       |                        |
|----------------|-------------------|-------|------------------------|
| XP_012266705.1 | <i>Mes-4</i>      | Ash   | <i>Athalia rosae</i>   |
| XP_012266861.1 | <i>Set1</i>       | Trx   | <i>Athalia rosae</i>   |
| XP_012256884.1 | <i>Set2</i>       | Ash   | <i>Athalia rosae</i>   |
| XP_012254429.1 | <i>Set8</i>       | -     | <i>Athalia rosae</i>   |
| XP_012256557.1 | <i>setd</i>       | SETD  | <i>Athalia rosae</i>   |
| XP_012251505.1 | <i>Smyd3</i>      | SMYD  | <i>Athalia rosae</i>   |
| XP_012251654.1 | <i>Smyd4-2</i>    | SMYD  | <i>Athalia rosae</i>   |
| XP_012268663.1 | <i>Smyd4-2</i>    | SMYD  | <i>Athalia rosae</i>   |
| XP_012257200.1 | <i>Smyd4-3</i>    | SMYD  | <i>Athalia rosae</i>   |
| XP_012267297.1 | <i>Smyd4-3</i>    | SMYD  | <i>Athalia rosae</i>   |
| XP_012267599.1 | <i>Smyd4-4</i>    | SMYD  | <i>Athalia rosae</i>   |
| XP_012261874.1 | <i>Smyd5</i>      | SMYD  | <i>Athalia rosae</i>   |
| XP_012267502.1 | <i>SmydA-1</i>    | SmydA | <i>Athalia rosae</i>   |
| XP_012268035.1 | <i>SmydA-3</i>    | SmydA | <i>Athalia rosae</i>   |
| XP_012258552.1 | <i>SmydA-5</i>    | SmydA | <i>Athalia rosae</i>   |
| XP_012268041.1 | <i>SmydA-6</i>    | SmydA | <i>Athalia rosae</i>   |
| XP_012254696.1 | <i>SmydA-8</i>    | SmydA | <i>Athalia rosae</i>   |
| XP_012258464.1 | <i>Su(var)3-9</i> | Suv   | <i>Athalia rosae</i>   |
| XP_012251946.1 | <i>suv</i>        | Suv   | <i>Athalia rosae</i>   |
| XP_012260877.1 | <i>trx</i>        | Trx   | <i>Athalia rosae</i>   |
| ACEP_00014871  | -                 | -     | <i>Atta cephalotes</i> |
| ACEP_00015005  | <i>ash1</i>       | Ash   | <i>Atta cephalotes</i> |
| ACEP_00011370  | <i>Blimp-1</i>    | PRDM  | <i>Atta cephalotes</i> |
| ACEP_00010437  | <i>egg</i>        | Suv   | <i>Atta cephalotes</i> |
| ACEP_00006353  | <i>Ez</i>         | Ez    | <i>Atta cephalotes</i> |
| ACEP_00008842  | <i>G9a</i>        | Suv   | <i>Atta cephalotes</i> |
| ACEP_00000745  | <i>Hmt4-20</i>    | -     | <i>Atta cephalotes</i> |
| ACEP_00011229  | <i>Mes-4</i>      | Ash   | <i>Atta cephalotes</i> |
| ACEP_00007263  | <i>Set1</i>       | Trx   | <i>Atta cephalotes</i> |
| ACEP_00012429  | <i>Set2</i>       | Ash   | <i>Atta cephalotes</i> |
| ACEP_00000026  | <i>Set8</i>       | -     | <i>Atta cephalotes</i> |
| ACEP_00007464  | <i>setd</i>       | SETD  | <i>Atta cephalotes</i> |
| ACEP_00008566  | <i>Smyd3</i>      | SMYD  | <i>Atta cephalotes</i> |
| ACEP_00014186  | <i>Smyd4-2</i>    | SMYD  | <i>Atta cephalotes</i> |
| ACEP_00013996  | <i>Smyd4-2</i>    | SMYD  | <i>Atta cephalotes</i> |
| ACEP_00007748  | <i>Smyd4-3</i>    | SMYD  | <i>Atta cephalotes</i> |
| ACEP_00007892  | <i>Smyd4-3</i>    | SMYD  | <i>Atta cephalotes</i> |
| ACEP_00014643  | <i>Smyd4-4</i>    | SMYD  | <i>Atta cephalotes</i> |
| ACEP_00015233  | <i>Smyd4-4</i>    | SMYD  | <i>Atta cephalotes</i> |
| ACEP_00016065  | <i>Smyd5</i>      | SMYD  | <i>Atta cephalotes</i> |
| ACEP_00002782  | <i>SmydA-3</i>    | SmydA | <i>Atta cephalotes</i> |
| ACEP_00010580  | <i>SmydA-5</i>    | SmydA | <i>Atta cephalotes</i> |
| ACEP_00006444  | <i>SmydA-8</i>    | SmydA | <i>Atta cephalotes</i> |
| ACEP_00014833  | <i>Su(var)3-9</i> | Suv   | <i>Atta cephalotes</i> |

|                |                    |       |                              |
|----------------|--------------------|-------|------------------------------|
| ACEP_00012166  | <i>suv</i>         | Suv   | <i>Atta cephalotes</i>       |
| ACEP_00016352  | <i>trr</i>         | Trx   | <i>Atta cephalotes</i>       |
| ACEP_00002886  | <i>trx</i>         | Trx   | <i>Atta cephalotes</i>       |
| ACEP_00011025  | <i>upSET(MLL5)</i> | -     | <i>Atta cephalotes</i>       |
| XP_011188148.1 | -                  | -     | <i>Bactrocera cucurbitae</i> |
| XP_011176622.1 | <i>ash1</i>        | Ash   | <i>Bactrocera cucurbitae</i> |
| XP_011195704.1 | <i>Blimp-1</i>     | PRDM  | <i>Bactrocera cucurbitae</i> |
| XP_011196290.1 | <i>egg</i>         | Suv   | <i>Bactrocera cucurbitae</i> |
| XP_011183791.1 | <i>Ez</i>          | Ez    | <i>Bactrocera cucurbitae</i> |
| XP_011176759.1 | <i>G9a</i>         | Suv   | <i>Bactrocera cucurbitae</i> |
| XP_011192804.1 | <i>Mes-4</i>       | Ash   | <i>Bactrocera cucurbitae</i> |
| XP_011188172.1 | <i>Set1</i>        | Trx   | <i>Bactrocera cucurbitae</i> |
| XP_011185204.1 | <i>Set2</i>        | Ash   | <i>Bactrocera cucurbitae</i> |
| XP_011181958.1 | <i>Set8</i>        | -     | <i>Bactrocera cucurbitae</i> |
| XP_011177109.1 | <i>setd</i>        | SETD  | <i>Bactrocera cucurbitae</i> |
| XP_011178847.1 | <i>Smyd4-1</i>     | SMYD  | <i>Bactrocera cucurbitae</i> |
| XP_011179663.1 | <i>Smyd4-2</i>     | SMYD  | <i>Bactrocera cucurbitae</i> |
| XP_011192734.1 | <i>Smyd4-3</i>     | SMYD  | <i>Bactrocera cucurbitae</i> |
| XP_011180406.1 | <i>Smyd4-4</i>     | SMYD  | <i>Bactrocera cucurbitae</i> |
| XP_011179116.1 | <i>Smyd5</i>       | SMYD  | <i>Bactrocera cucurbitae</i> |
| XP_011190850.1 | <i>SmydA-1</i>     | SmydA | <i>Bactrocera cucurbitae</i> |
| XP_011186389.1 | <i>SmydA-2</i>     | SmydA | <i>Bactrocera cucurbitae</i> |
| XP_011192453.1 | <i>SmydA-3</i>     | SmydA | <i>Bactrocera cucurbitae</i> |
| XP_011190535.1 | <i>SmydA-4</i>     | SmydA | <i>Bactrocera cucurbitae</i> |
| XP_011184464.1 | <i>SmydA-5</i>     | SmydA | <i>Bactrocera cucurbitae</i> |
| XP_011179434.1 | <i>SmydA-6</i>     | SmydA | <i>Bactrocera cucurbitae</i> |
| XP_011179432.1 | <i>SmydA-7</i>     | SmydA | <i>Bactrocera cucurbitae</i> |
| XP_011177534.1 | <i>SmydA-8</i>     | SmydA | <i>Bactrocera cucurbitae</i> |
| XP_011177535.1 | <i>SmydA-8</i>     | SmydA | <i>Bactrocera cucurbitae</i> |
| XP_011177548.1 | <i>SmydA-9</i>     | SmydA | <i>Bactrocera cucurbitae</i> |
| XP_011197020.1 | <i>Su(var)3-9</i>  | Suv   | <i>Bactrocera cucurbitae</i> |
| XP_011194965.1 | <i>suv</i>         | Suv   | <i>Bactrocera cucurbitae</i> |
| XP_011184577.1 | <i>trr</i>         | Trx   | <i>Bactrocera cucurbitae</i> |
| XP_011191289.1 | <i>trx</i>         | Trx   | <i>Bactrocera cucurbitae</i> |
| XP_011180383.1 | <i>upSET(MLL5)</i> | -     | <i>Bactrocera cucurbitae</i> |
| XP_011200269.1 | -                  | -     | <i>Bactrocera dorsalis</i>   |
| XP_011200270.1 | -                  | -     | <i>Bactrocera dorsalis</i>   |
| XP_011206237.1 | -                  | -     | <i>Bactrocera dorsalis</i>   |
| XP_011208048.1 | <i>ash1</i>        | Ash   | <i>Bactrocera dorsalis</i>   |
| XP_011208049.1 | <i>ash1</i>        | Ash   | <i>Bactrocera dorsalis</i>   |
| XP_011214596.1 | <i>Blimp-1</i>     | PRDM  | <i>Bactrocera dorsalis</i>   |
| XP_011214597.1 | <i>Blimp-1</i>     | PRDM  | <i>Bactrocera dorsalis</i>   |
| XP_011202233.1 | <i>egg</i>         | Suv   | <i>Bactrocera dorsalis</i>   |
| XP_011212967.1 | <i>Ez</i>          | Ez    | <i>Bactrocera dorsalis</i>   |

|                   |                    |       |                            |
|-------------------|--------------------|-------|----------------------------|
| XP_011212966.1    | <i>Ez</i>          | Ez    | <i>Bactrocera dorsalis</i> |
| XP_011211948.1    | <i>G9a</i>         | Suv   | <i>Bactrocera dorsalis</i> |
| XP_011213500.1    | <i>Hmt4-20</i>     | -     | <i>Bactrocera dorsalis</i> |
| XP_011213501.1    | <i>Hmt4-20</i>     | -     | <i>Bactrocera dorsalis</i> |
| XP_011213502.1    | <i>Hmt4-20</i>     | -     | <i>Bactrocera dorsalis</i> |
| XP_011213503.1    | <i>Hmt4-20</i>     | -     | <i>Bactrocera dorsalis</i> |
| XP_011213504.1    | <i>Hmt4-20</i>     | -     | <i>Bactrocera dorsalis</i> |
| XP_011213505.1    | <i>Hmt4-20</i>     | -     | <i>Bactrocera dorsalis</i> |
| XP_011198612.1    | <i>Mes-4</i>       | Ash   | <i>Bactrocera dorsalis</i> |
| XP_011200659.1    | <i>Set1</i>        | Trx   | <i>Bactrocera dorsalis</i> |
| XP_011201871.1    | <i>Set2</i>        | Ash   | <i>Bactrocera dorsalis</i> |
| XP_011208713.1    | <i>Set8</i>        | -     | <i>Bactrocera dorsalis</i> |
| XP_011212148.1    | <i>setd</i>        | SETD  | <i>Bactrocera dorsalis</i> |
| XP_011214100.1    | <i>Smyd4-1</i>     | SMYD  | <i>Bactrocera dorsalis</i> |
| XP_011213895.1    | <i>Smyd4-3</i>     | SMYD  | <i>Bactrocera dorsalis</i> |
| XP_011213000.1    | <i>Smyd4-4</i>     | SMYD  | <i>Bactrocera dorsalis</i> |
| XP_011203140.1    | <i>Smyd5</i>       | SMYD  | <i>Bactrocera dorsalis</i> |
| XP_011202123.1    | <i>SmydA-1</i>     | SmydA | <i>Bactrocera dorsalis</i> |
| XP_011199497.1    | <i>SmydA-2</i>     | SmydA | <i>Bactrocera dorsalis</i> |
| XP_011206159.1    | <i>SmydA-3</i>     | SmydA | <i>Bactrocera dorsalis</i> |
| XP_011206149.1    | <i>SmydA-3</i>     | SmydA | <i>Bactrocera dorsalis</i> |
| XP_011204895.1    | <i>SmydA-4</i>     | SmydA | <i>Bactrocera dorsalis</i> |
| XP_011206042.1    | <i>SmydA-5</i>     | SmydA | <i>Bactrocera dorsalis</i> |
| XP_011206043.1    | <i>SmydA-5</i>     | SmydA | <i>Bactrocera dorsalis</i> |
| XP_011204315.1    | <i>SmydA-6</i>     | SmydA | <i>Bactrocera dorsalis</i> |
| XP_011204314.1    | <i>SmydA-7</i>     | SmydA | <i>Bactrocera dorsalis</i> |
| XP_011207120.1    | <i>SmydA-8</i>     | SmydA | <i>Bactrocera dorsalis</i> |
| XP_011207121.1    | <i>SmydA-9</i>     | SmydA | <i>Bactrocera dorsalis</i> |
| XP_011203153.1    | <i>Su(var)3-9</i>  | Suv   | <i>Bactrocera dorsalis</i> |
| XP_011203390.1    | <i>suv</i>         | Suv   | <i>Bactrocera dorsalis</i> |
| XP_011206134.1    | <i>trr</i>         | Trx   | <i>Bactrocera dorsalis</i> |
| XP_011206135.1    | <i>trr</i>         | Trx   | <i>Bactrocera dorsalis</i> |
| XP_011206137.1    | <i>trr</i>         | Trx   | <i>Bactrocera dorsalis</i> |
| XP_011206138.1    | <i>trr</i>         | Trx   | <i>Bactrocera dorsalis</i> |
| XP_011199371.1    | <i>trx</i>         | Trx   | <i>Bactrocera dorsalis</i> |
| XP_011200268.1    | <i>upSET(MLL5)</i> | -     | <i>Bactrocera dorsalis</i> |
| IU25_04690-mRNA-1 | -                  | -     | <i>Belgica antarctica</i>  |
| IU25_10565-mRNA-1 | -                  | -     | <i>Belgica antarctica</i>  |
| IU25_00528-mRNA-1 | <i>ash1</i>        | Ash   | <i>Belgica antarctica</i>  |
| IU25_08656-mRNA-1 | <i>Blimp-1</i>     | PRDM  | <i>Belgica antarctica</i>  |
| IU25_07936-mRNA-1 | <i>egg</i>         | Suv   | <i>Belgica antarctica</i>  |
| IU25_02089-mRNA-1 | <i>G9a</i>         | Suv   | <i>Belgica antarctica</i>  |
| IU25_05679-mRNA-1 | <i>Hmt4-20</i>     | -     | <i>Belgica antarctica</i>  |
| IU25_00891-mRNA-1 | <i>Mes-4</i>       | Ash   | <i>Belgica antarctica</i>  |

## Evolution of *SET* Genes in Insects

|                   |                   |       |                           |
|-------------------|-------------------|-------|---------------------------|
| IU25_05451-mRNA-1 | <i>Set1</i>       | Trx   | <i>Belgica antarctica</i> |
| IU25_10271-mRNA-1 | <i>Set1</i>       | Trx   | <i>Belgica antarctica</i> |
| IU25_10678-mRNA-1 | <i>Set2</i>       | Ash   | <i>Belgica antarctica</i> |
| IU25_01859-mRNA-1 | <i>Set8</i>       | -     | <i>Belgica antarctica</i> |
| IU25_12091-mRNA-1 | <i>setd</i>       | SETD  | <i>Belgica antarctica</i> |
| IU25_11943-mRNA-1 | <i>setd</i>       | SETD  | <i>Belgica antarctica</i> |
| IU25_00642-mRNA-1 | <i>Smyd4-1</i>    | SMYD  | <i>Belgica antarctica</i> |
| IU25_08766-mRNA-1 | <i>Smyd4-2</i>    | SMYD  | <i>Belgica antarctica</i> |
| IU25_08031-mRNA-1 | <i>Smyd4-3</i>    | SMYD  | <i>Belgica antarctica</i> |
| IU25_03721-mRNA-1 | <i>Smyd4-4</i>    | SMYD  | <i>Belgica antarctica</i> |
| IU25_00723-mRNA-1 | <i>Smyd4-4</i>    | SMYD  | <i>Belgica antarctica</i> |
| IU25_00904-mRNA-1 | <i>Smyd4-4</i>    | SMYD  | <i>Belgica antarctica</i> |
| IU25_01068-mRNA-1 | <i>Smyd4-4</i>    | SMYD  | <i>Belgica antarctica</i> |
| IU25_01069-mRNA-1 | <i>Smyd4-4</i>    | SMYD  | <i>Belgica antarctica</i> |
| IU25_01260-mRNA-1 | <i>Smyd4-4</i>    | SMYD  | <i>Belgica antarctica</i> |
| IU25_01871-mRNA-1 | <i>Smyd4-4</i>    | SMYD  | <i>Belgica antarctica</i> |
| IU25_03606-mRNA-1 | <i>Smyd4-4</i>    | SMYD  | <i>Belgica antarctica</i> |
| IU25_05375-mRNA-1 | <i>Smyd4-4</i>    | SMYD  | <i>Belgica antarctica</i> |
| IU25_06006-mRNA-1 | <i>Smyd4-4</i>    | SMYD  | <i>Belgica antarctica</i> |
| IU25_06668-mRNA-1 | <i>Smyd4-4</i>    | SMYD  | <i>Belgica antarctica</i> |
| IU25_07270-mRNA-1 | <i>Smyd4-4</i>    | SMYD  | <i>Belgica antarctica</i> |
| IU25_07274-mRNA-1 | <i>Smyd4-4</i>    | SMYD  | <i>Belgica antarctica</i> |
| IU25_08842-mRNA-1 | <i>Smyd4-4</i>    | SMYD  | <i>Belgica antarctica</i> |
| IU25_10111-mRNA-1 | <i>Smyd4-4</i>    | SMYD  | <i>Belgica antarctica</i> |
| IU25_10113-mRNA-1 | <i>Smyd4-4</i>    | SMYD  | <i>Belgica antarctica</i> |
| IU25_10152-mRNA-1 | <i>Smyd4-4</i>    | SMYD  | <i>Belgica antarctica</i> |
| IU25_11387-mRNA-1 | <i>Smyd4-4</i>    | SMYD  | <i>Belgica antarctica</i> |
| IU25_11765-mRNA-1 | <i>Smyd4-4</i>    | SMYD  | <i>Belgica antarctica</i> |
| IU25_12237-mRNA-1 | <i>Smyd4-4</i>    | SMYD  | <i>Belgica antarctica</i> |
| IU25_12452-mRNA-1 | <i>Smyd4-4</i>    | SMYD  | <i>Belgica antarctica</i> |
| IU25_12491-mRNA-1 | <i>Smyd4-4</i>    | SMYD  | <i>Belgica antarctica</i> |
| IU25_12675-mRNA-1 | <i>Smyd4-4</i>    | SMYD  | <i>Belgica antarctica</i> |
| IU25_10269-mRNA-1 | <i>Smyd5</i>      | SMYD  | <i>Belgica antarctica</i> |
| IU25_09331-mRNA-1 | <i>SmydA-1</i>    | SmydA | <i>Belgica antarctica</i> |
| IU25_01008-mRNA-1 | <i>SmydA-2</i>    | SmydA | <i>Belgica antarctica</i> |
| IU25_07109-mRNA-1 | <i>SmydA-3</i>    | SmydA | <i>Belgica antarctica</i> |
| IU25_03751-mRNA-1 | <i>SmydA-4</i>    | SmydA | <i>Belgica antarctica</i> |
| IU25_02565-mRNA-1 | <i>SmydA-4</i>    | SmydA | <i>Belgica antarctica</i> |
| IU25_06201-mRNA-1 | <i>SmydA-5</i>    | SmydA | <i>Belgica antarctica</i> |
| IU25_12890-mRNA-1 | <i>SmydA-5</i>    | SmydA | <i>Belgica antarctica</i> |
| IU25_02010-mRNA-1 | <i>SmydA-8</i>    | SmydA | <i>Belgica antarctica</i> |
| IU25_06490-mRNA-1 | <i>Su(var)3-9</i> | Suv   | <i>Belgica antarctica</i> |
| IU25_01555-mRNA-1 | <i>Su(var)3-9</i> | Suv   | <i>Belgica antarctica</i> |
| IU25_09435-mRNA-1 | <i>suv</i>        | Suv   | <i>Belgica antarctica</i> |

## Evolution of *SET* Genes in Insects

|                   |                    |       |                            |
|-------------------|--------------------|-------|----------------------------|
| IU25_11118-mRNA-1 | <i>trr</i>         | Trx   | <i>Belgica antarctica</i>  |
| IU25_03226-mRNA-1 | <i>trx</i>         | Trx   | <i>Belgica antarctica</i>  |
| BGER006344        | <i>ash1</i>        | Ash   | <i>Blattella germanica</i> |
| BGER020182        | <i>Blimp-1</i>     | PRDM  | <i>Blattella germanica</i> |
| BGER002073        | <i>Blimp-1</i>     | PRDM  | <i>Blattella germanica</i> |
| BGER011023        | <i>egg</i>         | Suv   | <i>Blattella germanica</i> |
| BGER007156        | <i>G9a</i>         | Suv   | <i>Blattella germanica</i> |
| BGER002755        | <i>Hmt4-20</i>     | -     | <i>Blattella germanica</i> |
| BGER017642        | <i>Mes-4</i>       | Ash   | <i>Blattella germanica</i> |
| BGER027636        | <i>Mes-4</i>       | Ash   | <i>Blattella germanica</i> |
| BGER015052        | <i>Set2</i>        | Ash   | <i>Blattella germanica</i> |
| BGER016165        | <i>Set8</i>        | -     | <i>Blattella germanica</i> |
| BGER022530        | <i>setd</i>        | SETD  | <i>Blattella germanica</i> |
| BGER022529        | <i>setd</i>        | SETD  | <i>Blattella germanica</i> |
| BGER011879        | <i>Smyd4-2</i>     | SMYD  | <i>Blattella germanica</i> |
| BGER015689        | <i>Smyd4-2</i>     | SMYD  | <i>Blattella germanica</i> |
| BGER005639        | <i>Smyd4-2</i>     | SMYD  | <i>Blattella germanica</i> |
| BGER011191        | <i>Smyd5</i>       | SMYD  | <i>Blattella germanica</i> |
| BGER004943        | <i>SmydA-1</i>     | SmydA | <i>Blattella germanica</i> |
| BGER006802        | <i>SmydA-2</i>     | SmydA | <i>Blattella germanica</i> |
| BGER004944        | <i>SmydA-4</i>     | SmydA | <i>Blattella germanica</i> |
| BGER008636        | <i>SmydA-8</i>     | SmydA | <i>Blattella germanica</i> |
| BGER028006        | <i>Su(var)3-9</i>  | Suv   | <i>Blattella germanica</i> |
| BGER005717        | <i>trr</i>         | Trx   | <i>Blattella germanica</i> |
| BGER025951        | <i>trx</i>         | Trx   | <i>Blattella germanica</i> |
| BGER019382        | <i>upSET(MLL5)</i> | -     | <i>Blattella germanica</i> |
| Bimp04847         | -                  | -     | <i>Bombus impatiens</i>    |
| Bimp12520         | -                  | -     | <i>Bombus impatiens</i>    |
| Bimp11516         | <i>ash1</i>        | Ash   | <i>Bombus impatiens</i>    |
| Bimp08899         | <i>Blimp-1</i>     | PRDM  | <i>Bombus impatiens</i>    |
| Bimp02612         | <i>egg</i>         | Suv   | <i>Bombus impatiens</i>    |
| Bimp01437         | <i>Ez</i>          | Ez    | <i>Bombus impatiens</i>    |
| Bimp06854         | <i>G9a</i>         | Suv   | <i>Bombus impatiens</i>    |
| Bimp12779         | <i>Hmt4-20</i>     | -     | <i>Bombus impatiens</i>    |
| Bimp13077         | <i>Mes-4</i>       | Ash   | <i>Bombus impatiens</i>    |
| Bimp12329         | <i>Set1</i>        | Trx   | <i>Bombus impatiens</i>    |
| Bimp09037         | <i>Set2</i>        | Ash   | <i>Bombus impatiens</i>    |
| Bimp03899         | <i>Set8</i>        | -     | <i>Bombus impatiens</i>    |
| Bimp04211         | <i>setd</i>        | SETD  | <i>Bombus impatiens</i>    |
| Bimp08276         | <i>Smyd4-2</i>     | SMYD  | <i>Bombus impatiens</i>    |
| Bimp03415         | <i>Smyd4-3</i>     | SMYD  | <i>Bombus impatiens</i>    |
| Bimp08047         | <i>Smyd4-3</i>     | SMYD  | <i>Bombus impatiens</i>    |
| Bimp13566         | <i>Smyd4-3</i>     | SMYD  | <i>Bombus impatiens</i>    |
| Bimp10275         | <i>Smyd4-4</i>     | SMYD  | <i>Bombus impatiens</i>    |

|               |                    |       |                          |
|---------------|--------------------|-------|--------------------------|
| Bimp02797     | <i>Smyd4-4</i>     | SMYD  | <i>Bombus impatiens</i>  |
| Bimp02745     | <i>Smyd5</i>       | SMYD  | <i>Bombus impatiens</i>  |
| Bimp14104     | <i>SmydA-1</i>     | SmydA | <i>Bombus impatiens</i>  |
| Bimp02590     | <i>SmydA-3</i>     | SmydA | <i>Bombus impatiens</i>  |
| Bimp12013     | <i>SmydA-4</i>     | SmydA | <i>Bombus impatiens</i>  |
| Bimp12651     | <i>SmydA-5</i>     | SmydA | <i>Bombus impatiens</i>  |
| Bimp09996     | <i>SmydA-8</i>     | SmydA | <i>Bombus impatiens</i>  |
| Bimp05474     | <i>Su(var)3-9</i>  | Suv   | <i>Bombus impatiens</i>  |
| Bimp10158     | <i>suv</i>         | Suv   | <i>Bombus impatiens</i>  |
| Bimp12146     | <i>trr</i>         | Trx   | <i>Bombus impatiens</i>  |
| Bimp05951     | <i>trx</i>         | Trx   | <i>Bombus impatiens</i>  |
| Bimp09131     | <i>upSET(MLL5)</i> | -     | <i>Bombus impatiens</i>  |
| Bter05546     | -                  | -     | <i>Bombus terrestris</i> |
| Bter07245     | <i>ash1</i>        | Ash   | <i>Bombus terrestris</i> |
| Bter05279     | <i>Blimp-1</i>     | PRDM  | <i>Bombus terrestris</i> |
| Bter06631     | <i>egg</i>         | Suv   | <i>Bombus terrestris</i> |
| Bter04454     | <i>Ez</i>          | Ez    | <i>Bombus terrestris</i> |
| Bter01253     | <i>G9a</i>         | Suv   | <i>Bombus terrestris</i> |
| Bter09373     | <i>Hmt4-20</i>     | -     | <i>Bombus terrestris</i> |
| Bter10757     | <i>Mes-4</i>       | Ash   | <i>Bombus terrestris</i> |
| Bter10939     | <i>Set1</i>        | Trx   | <i>Bombus terrestris</i> |
| Bter08592     | <i>Set2</i>        | Ash   | <i>Bombus terrestris</i> |
| Bter04090     | <i>Set8</i>        | -     | <i>Bombus terrestris</i> |
| Bter05137     | <i>setd</i>        | SETD  | <i>Bombus terrestris</i> |
| Bter00208     | <i>Smyd4-2</i>     | SMYD  | <i>Bombus terrestris</i> |
| Bter09116     | <i>Smyd4-2</i>     | SMYD  | <i>Bombus terrestris</i> |
| Bter01460     | <i>Smyd4-3</i>     | SMYD  | <i>Bombus terrestris</i> |
| Bter05601     | <i>Smyd4-3</i>     | SMYD  | <i>Bombus terrestris</i> |
| Bter06829     | <i>Smyd4-3</i>     | SMYD  | <i>Bombus terrestris</i> |
| Bter07499     | <i>Smyd4-4</i>     | SMYD  | <i>Bombus terrestris</i> |
| Bter03698     | <i>Smyd4-4</i>     | SMYD  | <i>Bombus terrestris</i> |
| Bter07912     | <i>Smyd5</i>       | SMYD  | <i>Bombus terrestris</i> |
| Bter06604     | <i>SmydA-3</i>     | SmydA | <i>Bombus terrestris</i> |
| Bter06605     | <i>SmydA-4</i>     | SmydA | <i>Bombus terrestris</i> |
| Bter00806     | <i>SmydA-5</i>     | SmydA | <i>Bombus terrestris</i> |
| Bter12980     | <i>SmydA-8</i>     | SmydA | <i>Bombus terrestris</i> |
| Bter08904     | <i>Su(var)3-9</i>  | Suv   | <i>Bombus terrestris</i> |
| Bter08526     | <i>suv</i>         | Suv   | <i>Bombus terrestris</i> |
| Bter11235     | <i>trr</i>         | Trx   | <i>Bombus terrestris</i> |
| Bter00752     | <i>trx</i>         | Trx   | <i>Bombus terrestris</i> |
| Bter08547     | <i>upSET(MLL5)</i> | -     | <i>Bombus terrestris</i> |
| BGIBMGA001497 | <i>ash1</i>        | Ash   | <i>Bombyx mori</i>       |
| BGIBMGA000319 | <i>Blimp-1</i>     | PRDM  | <i>Bombyx mori</i>       |
| BGIBMGA011407 | <i>egg</i>         | Suv   | <i>Bombyx mori</i>       |

|               |                    |       |                              |
|---------------|--------------------|-------|------------------------------|
| BGIBMGA014476 | <i>Ez</i>          | Ez    | <i>Bombyx mori</i>           |
| BGIBMGA007949 | <i>G9a</i>         | Suv   | <i>Bombyx mori</i>           |
| BGIBMGA000919 | <i>Hmt4-20</i>     | -     | <i>Bombyx mori</i>           |
| BGIBMGA002246 | <i>Mes-4</i>       | Ash   | <i>Bombyx mori</i>           |
| BGIBMGA012978 | <i>Set1</i>        | Trx   | <i>Bombyx mori</i>           |
| BGIBMGA003106 | <i>Set2</i>        | Ash   | <i>Bombyx mori</i>           |
| BGIBMGA012853 | <i>Set8</i>        | -     | <i>Bombyx mori</i>           |
| BGIBMGA008518 | <i>setd</i>        | SETD  | <i>Bombyx mori</i>           |
| BGIBMGA008517 | <i>setd</i>        | SETD  | <i>Bombyx mori</i>           |
| BGIBMGA002076 | <i>Smyd4-2</i>     | SMYD  | <i>Bombyx mori</i>           |
| BGIBMGA007907 | <i>Smyd4-3</i>     | SMYD  | <i>Bombyx mori</i>           |
| BGIBMGA014048 | <i>Smyd4-4</i>     | SMYD  | <i>Bombyx mori</i>           |
| BGIBMGA011073 | <i>Smyd5</i>       | SMYD  | <i>Bombyx mori</i>           |
| BGIBMGA008839 | <i>SmydA-1</i>     | SmydA | <i>Bombyx mori</i>           |
| BGIBMGA008939 | <i>SmydA-2</i>     | SmydA | <i>Bombyx mori</i>           |
| BGIBMGA008923 | <i>SmydA-3</i>     | SmydA | <i>Bombyx mori</i>           |
| BGIBMGA008838 | <i>SmydA-4</i>     | SmydA | <i>Bombyx mori</i>           |
| BGIBMGA003139 | <i>SmydA-8</i>     | SmydA | <i>Bombyx mori</i>           |
| BGIBMGA011500 | <i>Su(var)3-9</i>  | Suv   | <i>Bombyx mori</i>           |
| BGIBMGA007557 | <i>suv</i>         | Suv   | <i>Bombyx mori</i>           |
| BGIBMGA002503 | <i>trr</i>         | Trx   | <i>Bombyx mori</i>           |
| BGIBMGA010221 | <i>trx</i>         | Trx   | <i>Bombyx mori</i>           |
| BGIBMGA004310 | <i>upSET(MLL5)</i> | -     | <i>Bombyx mori</i>           |
| Cflo_06609    | -                  | -     | <i>Camponotus floridanus</i> |
| Cflo_10932    | <i>ash1</i>        | Ash   | <i>Camponotus floridanus</i> |
| Cflo_04377    | <i>Blimp-1</i>     | PRDM  | <i>Camponotus floridanus</i> |
| Cflo_09617    | <i>egg</i>         | Suv   | <i>Camponotus floridanus</i> |
| Cflo_10335    | <i>Ez</i>          | Ez    | <i>Camponotus floridanus</i> |
| Cflo_12188    | <i>G9a</i>         | Suv   | <i>Camponotus floridanus</i> |
| Cflo_05373    | <i>Hmt4-20</i>     | -     | <i>Camponotus floridanus</i> |
| Cflo_01290    | <i>Mes-4</i>       | Ash   | <i>Camponotus floridanus</i> |
| Cflo_12528    | <i>Set1</i>        | Trx   | <i>Camponotus floridanus</i> |
| Cflo_04573    | <i>Set8</i>        | -     | <i>Camponotus floridanus</i> |
| Cflo_09803    | <i>setd</i>        | SETD  | <i>Camponotus floridanus</i> |
| Cflo_09801    | <i>setd</i>        | SETD  | <i>Camponotus floridanus</i> |
| Cflo_08673    | <i>Smyd3</i>       | SMYD  | <i>Camponotus floridanus</i> |
| Cflo_06032    | <i>Smyd4-2</i>     | SMYD  | <i>Camponotus floridanus</i> |
| Cflo_06938    | <i>Smyd4-2</i>     | SMYD  | <i>Camponotus floridanus</i> |
| Cflo_12246    | <i>Smyd4-2</i>     | SMYD  | <i>Camponotus floridanus</i> |
| Cflo_09007    | <i>Smyd4-3</i>     | SMYD  | <i>Camponotus floridanus</i> |
| Cflo_03939    | <i>Smyd4-4</i>     | SMYD  | <i>Camponotus floridanus</i> |
| Cflo_15030    | <i>Smyd4-4</i>     | SMYD  | <i>Camponotus floridanus</i> |
| Cflo_05356    | <i>Smyd5</i>       | SMYD  | <i>Camponotus floridanus</i> |
| Cflo_08953    | <i>SmydA-3</i>     | SmydA | <i>Camponotus floridanus</i> |



|            |                    |       |                                |
|------------|--------------------|-------|--------------------------------|
| Cflo_10149 | <i>SmydA-5</i>     | SmydA | <i>Camponotus floridanus</i>   |
| Cflo_08954 | <i>SmydA-6</i>     | SmydA | <i>Camponotus floridanus</i>   |
| Cflo_06803 | <i>SmydA-8</i>     | SmydA | <i>Camponotus floridanus</i>   |
| Cflo_12501 | <i>suv</i>         | Suv   | <i>Camponotus floridanus</i>   |
| Cflo_01543 | <i>trx</i>         | Trx   | <i>Camponotus floridanus</i>   |
| Cflo_12296 | <i>upSET(MLL5)</i> | -     | <i>Camponotus floridanus</i>   |
| Cobs_02028 | -                  | -     | <i>Cardiocondyla obscurior</i> |
| Cobs_13062 | -                  | -     | <i>Cardiocondyla obscurior</i> |
| Cobs_02243 | <i>ash1</i>        | Ash   | <i>Cardiocondyla obscurior</i> |
| Cobs_03004 | <i>Blimp-1</i>     | PRDM  | <i>Cardiocondyla obscurior</i> |
| Cobs_06230 | <i>egg</i>         | Suv   | <i>Cardiocondyla obscurior</i> |
| Cobs_09623 | <i>Ez</i>          | Ez    | <i>Cardiocondyla obscurior</i> |
| Cobs_07320 | <i>G9a</i>         | Suv   | <i>Cardiocondyla obscurior</i> |
| Cobs_11998 | <i>Hmt4-20</i>     | -     | <i>Cardiocondyla obscurior</i> |
| Cobs_15648 | <i>Mes-4</i>       | Ash   | <i>Cardiocondyla obscurior</i> |
| Cobs_03353 | <i>Set1</i>        | Trx   | <i>Cardiocondyla obscurior</i> |
| Cobs_15746 | <i>Set2</i>        | Ash   | <i>Cardiocondyla obscurior</i> |
| Cobs_12217 | <i>Set8</i>        | -     | <i>Cardiocondyla obscurior</i> |
| Cobs_12222 | <i>Set8</i>        | -     | <i>Cardiocondyla obscurior</i> |
| Cobs_00379 | <i>setd</i>        | SETD  | <i>Cardiocondyla obscurior</i> |
| Cobs_00400 | <i>setd</i>        | SETD  | <i>Cardiocondyla obscurior</i> |
| Cobs_11117 | <i>Smyd4-2</i>     | SMYD  | <i>Cardiocondyla obscurior</i> |
| Cobs_09466 | <i>Smyd4-2</i>     | SMYD  | <i>Cardiocondyla obscurior</i> |
| Cobs_03894 | <i>Smyd4-3</i>     | SMYD  | <i>Cardiocondyla obscurior</i> |
| Cobs_03955 | <i>Smyd4-3</i>     | SMYD  | <i>Cardiocondyla obscurior</i> |
| Cobs_13160 | <i>Smyd4-4</i>     | SMYD  | <i>Cardiocondyla obscurior</i> |
| Cobs_04265 | <i>Smyd4-4</i>     | SMYD  | <i>Cardiocondyla obscurior</i> |
| Cobs_02856 | <i>Smyd5</i>       | SMYD  | <i>Cardiocondyla obscurior</i> |
| Cobs_05676 | <i>SmydA-3</i>     | SmydA | <i>Cardiocondyla obscurior</i> |
| Cobs_14589 | <i>SmydA-4</i>     | SmydA | <i>Cardiocondyla obscurior</i> |
| Cobs_06124 | <i>SmydA-5</i>     | SmydA | <i>Cardiocondyla obscurior</i> |
| Cobs_06906 | <i>SmydA-8</i>     | SmydA | <i>Cardiocondyla obscurior</i> |
| Cobs_08762 | <i>Su(var)3-9</i>  | Suv   | <i>Cardiocondyla obscurior</i> |
| Cobs_05777 | <i>suv</i>         | Suv   | <i>Cardiocondyla obscurior</i> |
| Cobs_17490 | <i>trr</i>         | Trx   | <i>Cardiocondyla obscurior</i> |
| Cobs_02821 | <i>trx</i>         | Trx   | <i>Cardiocondyla obscurior</i> |
| Cobs_01120 | <i>upSET(MLL5)</i> | -     | <i>Cardiocondyla obscurior</i> |
| CAQU000974 | -                  | -     | <i>Catajapyx aquilonaris</i>   |
| CAQU003948 | -                  | -     | <i>Catajapyx aquilonaris</i>   |
| CAQU008317 | <i>ash1</i>        | Ash   | <i>Catajapyx aquilonaris</i>   |
| CAQU006987 | <i>Blimp-1</i>     | PRDM  | <i>Catajapyx aquilonaris</i>   |
| CAQU009584 | <i>egg</i>         | Suv   | <i>Catajapyx aquilonaris</i>   |
| CAQU006575 | <i>egg</i>         | Suv   | <i>Catajapyx aquilonaris</i>   |
| CAQU008672 | <i>egg</i>         | Suv   | <i>Catajapyx aquilonaris</i>   |

|            |                    |       |                                |
|------------|--------------------|-------|--------------------------------|
| CAQU009251 | <i>egg</i>         | Suv   | <i>Catajapyx aquilonaris</i>   |
| CAQU010052 | <i>egg</i>         | Suv   | <i>Catajapyx aquilonaris</i>   |
| CAQU003673 | <i>Ez</i>          | Ez    | <i>Catajapyx aquilonaris</i>   |
| CAQU006666 | <i>G9a</i>         | Suv   | <i>Catajapyx aquilonaris</i>   |
| CAQU004348 | <i>Hmt4-20</i>     | -     | <i>Catajapyx aquilonaris</i>   |
| CAQU003309 | <i>Mes-4</i>       | Ash   | <i>Catajapyx aquilonaris</i>   |
| CAQU006724 | <i>Mes-4</i>       | Ash   | <i>Catajapyx aquilonaris</i>   |
| CAQU007463 | <i>Mes-4</i>       | Ash   | <i>Catajapyx aquilonaris</i>   |
| CAQU005130 | <i>Set1</i>        | Trx   | <i>Catajapyx aquilonaris</i>   |
| CAQU002743 | <i>Set2</i>        | Ash   | <i>Catajapyx aquilonaris</i>   |
| CAQU004916 | <i>Set8</i>        | -     | <i>Catajapyx aquilonaris</i>   |
| CAQU001133 | <i>setd</i>        | SETD  | <i>Catajapyx aquilonaris</i>   |
| CAQU002086 | <i>Smyd3</i>       | SMYD  | <i>Catajapyx aquilonaris</i>   |
| CAQU002583 | <i>Smyd4-2</i>     | SMYD  | <i>Catajapyx aquilonaris</i>   |
| CAQU000020 | <i>Smyd4-3</i>     | SMYD  | <i>Catajapyx aquilonaris</i>   |
| CAQU007067 | <i>Smyd4-3</i>     | SMYD  | <i>Catajapyx aquilonaris</i>   |
| CAQU007929 | <i>Smyd4-3</i>     | SMYD  | <i>Catajapyx aquilonaris</i>   |
| CAQU008111 | <i>SmydA-2</i>     | SmydA | <i>Catajapyx aquilonaris</i>   |
| CAQU002468 | <i>SmydA-2</i>     | SmydA | <i>Catajapyx aquilonaris</i>   |
| CAQU006587 | <i>SmydA-3</i>     | SmydA | <i>Catajapyx aquilonaris</i>   |
| CAQU000051 | <i>Su(var)3-9</i>  | Suv   | <i>Catajapyx aquilonaris</i>   |
| CAQU008933 | <i>suv</i>         | Suv   | <i>Catajapyx aquilonaris</i>   |
| CAQU009228 | <i>upSET(MLL5)</i> | -     | <i>Catajapyx aquilonaris</i>   |
| CSCU016626 | <i>ash1</i>        | Ash   | <i>Centruroides exilicauda</i> |
| CSCU017888 | <i>Blimp-1</i>     | PRDM  | <i>Centruroides exilicauda</i> |
| CSCU012540 | <i>Blimp-1</i>     | PRDM  | <i>Centruroides exilicauda</i> |
| CSCU027036 | <i>Blimp-1</i>     | PRDM  | <i>Centruroides exilicauda</i> |
| CSCU019674 | <i>egg</i>         | Suv   | <i>Centruroides exilicauda</i> |
| CSCU027935 | <i>egg</i>         | Suv   | <i>Centruroides exilicauda</i> |
| CSCU003019 | <i>Ez</i>          | Ez    | <i>Centruroides exilicauda</i> |
| CSCU010330 | <i>G9a</i>         | Suv   | <i>Centruroides exilicauda</i> |
| CSCU006684 | <i>G9a</i>         | Suv   | <i>Centruroides exilicauda</i> |
| CSCU021696 | <i>Hmt4-20</i>     | -     | <i>Centruroides exilicauda</i> |
| CSCU016417 | <i>Mes-4</i>       | Ash   | <i>Centruroides exilicauda</i> |
| CSCU007994 | <i>Set1</i>        | Trx   | <i>Centruroides exilicauda</i> |
| CSCU003748 | <i>Set2</i>        | Ash   | <i>Centruroides exilicauda</i> |
| CSCU023248 | <i>setd</i>        | SETD  | <i>Centruroides exilicauda</i> |
| CSCU027284 | <i>Smyd4-3</i>     | SMYD  | <i>Centruroides exilicauda</i> |
| CSCU004980 | <i>Smyd5</i>       | SMYD  | <i>Centruroides exilicauda</i> |
| CSCU028343 | <i>Su(var)3-9</i>  | Suv   | <i>Centruroides exilicauda</i> |
| CSCU009512 | <i>suv</i>         | Suv   | <i>Centruroides exilicauda</i> |
| CSCU015241 | <i>trr</i>         | Trx   | <i>Centruroides exilicauda</i> |
| CSCU016579 | <i>trx</i>         | Trx   | <i>Centruroides exilicauda</i> |
| CSCU000650 | <i>upSET(MLL5)</i> | -     | <i>Centruroides exilicauda</i> |

|                |                    |       |                           |
|----------------|--------------------|-------|---------------------------|
| XP_015591864.1 | <i>Blimp-1</i>     | PRDM  | <i>Cephus cinctus</i>     |
| XP_015588809.1 | <i>egg</i>         | Suv   | <i>Cephus cinctus</i>     |
| XP_015608564.1 | <i>G9a</i>         | Suv   | <i>Cephus cinctus</i>     |
| XP_015593020.1 | <i>Set1</i>        | Trx   | <i>Cephus cinctus</i>     |
| XP_015606617.1 | <i>Set8</i>        | -     | <i>Cephus cinctus</i>     |
| XP_015587046.1 | <i>setd</i>        | SETD  | <i>Cephus cinctus</i>     |
| XP_015595002.1 | <i>Smyd4-1</i>     | SMYD  | <i>Cephus cinctus</i>     |
| XP_015585699.1 | <i>Smyd4-2</i>     | SMYD  | <i>Cephus cinctus</i>     |
| XP_015599275.1 | <i>Smyd4-3</i>     | SMYD  | <i>Cephus cinctus</i>     |
| XP_015598490.1 | <i>Smyd4-3</i>     | SMYD  | <i>Cephus cinctus</i>     |
| XP_015610301.1 | <i>Smyd4-4</i>     | SMYD  | <i>Cephus cinctus</i>     |
| XP_015597696.1 | <i>Smyd5</i>       | SMYD  | <i>Cephus cinctus</i>     |
| XP_015588255.1 | <i>SmydA-3</i>     | SmydA | <i>Cephus cinctus</i>     |
| XP_015588254.1 | <i>SmydA-4</i>     | SmydA | <i>Cephus cinctus</i>     |
| XP_015595619.1 | <i>SmydA-5</i>     | SmydA | <i>Cephus cinctus</i>     |
| XP_015607741.1 | <i>SmydA-8</i>     | SmydA | <i>Cephus cinctus</i>     |
| XP_015585211.1 | <i>Su(var)3-9</i>  | Suv   | <i>Cephus cinctus</i>     |
| XP_015609433.1 | <i>trx</i>         | Trx   | <i>Cephus cinctus</i>     |
| XP_015601121.1 | <i>upSET(MLL5)</i> | -     | <i>Cephus cinctus</i>     |
| XP_011351441.1 | <i>Blimp-1</i>     | PRDM  | <i>Cerapachys biroi</i>   |
| XP_011347842.1 | <i>Ez</i>          | Ez    | <i>Cerapachys biroi</i>   |
| XP_011347415.1 | <i>G9a</i>         | Suv   | <i>Cerapachys biroi</i>   |
| XP_011344661.1 | <i>Set1</i>        | Trx   | <i>Cerapachys biroi</i>   |
| XP_011341269.1 | <i>Set8</i>        | -     | <i>Cerapachys biroi</i>   |
| XP_011338544.1 | <i>setd</i>        | SETD  | <i>Cerapachys biroi</i>   |
| XP_011338883.1 | <i>Smyd4-3</i>     | SMYD  | <i>Cerapachys biroi</i>   |
| XP_011351984.1 | <i>Smyd4-3</i>     | SMYD  | <i>Cerapachys biroi</i>   |
| XP_011347284.1 | <i>Smyd4-4</i>     | SMYD  | <i>Cerapachys biroi</i>   |
| XP_011342209.1 | <i>Smyd4-4</i>     | SMYD  | <i>Cerapachys biroi</i>   |
| XP_011329713.1 | <i>Smyd5</i>       | SMYD  | <i>Cerapachys biroi</i>   |
| XP_011333272.1 | <i>SmydA-3</i>     | SmydA | <i>Cerapachys biroi</i>   |
| XP_011333274.1 | <i>SmydA-4</i>     | SmydA | <i>Cerapachys biroi</i>   |
| XP_011333700.1 | <i>SmydA-5</i>     | SmydA | <i>Cerapachys biroi</i>   |
| XP_011336875.1 | <i>SmydA-8</i>     | SmydA | <i>Cerapachys biroi</i>   |
| XP_011336738.1 | <i>Su(var)3-9</i>  | Suv   | <i>Cerapachys biroi</i>   |
| XP_011339538.1 | <i>suv</i>         | Suv   | <i>Cerapachys biroi</i>   |
| XP_011331544.1 | <i>trr</i>         | Trx   | <i>Cerapachys biroi</i>   |
| XP_011333299.1 | <i>trx</i>         | Trx   | <i>Cerapachys biroi</i>   |
| XP_011332728.1 | <i>upSET(MLL5)</i> | -     | <i>Cerapachys biroi</i>   |
| XP_012157287.1 | -                  | -     | <i>Ceratina calcarata</i> |
| XP_004537513.1 | <i>egg</i>         | Suv   | <i>Ceratina calcarata</i> |
| XP_004523769.1 | <i>Ez</i>          | Ez    | <i>Ceratina calcarata</i> |
| XP_012156247.1 | <i>G9a</i>         | Suv   | <i>Ceratina calcarata</i> |
| XP_004530722.1 | <i>Mes-4</i>       | Ash   | <i>Ceratina calcarata</i> |

|                |                   |       |                           |
|----------------|-------------------|-------|---------------------------|
| XP_004524249.1 | <i>Set1</i>       | Trx   | <i>Ceratina calcarata</i> |
| XP_004536421.1 | <i>Set2</i>       | Ash   | <i>Ceratina calcarata</i> |
| XP_004520416.1 | <i>setd</i>       | SETD  | <i>Ceratina calcarata</i> |
| XP_012160266.1 | <i>Smyd4-1</i>    | SMYD  | <i>Ceratina calcarata</i> |
| XP_004525269.1 | <i>Smyd4-2</i>    | SMYD  | <i>Ceratina calcarata</i> |
| XP_004535900.2 | <i>Smyd4-3</i>    | SMYD  | <i>Ceratina calcarata</i> |
| XP_004529963.1 | <i>Smyd4-4</i>    | SMYD  | <i>Ceratina calcarata</i> |
| XP_004519541.1 | <i>Smyd5</i>      | SMYD  | <i>Ceratina calcarata</i> |
| XP_004526552.1 | <i>SmydA-1</i>    | SmydA | <i>Ceratina calcarata</i> |
| XP_004530579.1 | <i>SmydA-2</i>    | SmydA | <i>Ceratina calcarata</i> |
| XP_004524764.1 | <i>SmydA-3</i>    | SmydA | <i>Ceratina calcarata</i> |
| XP_004535903.2 | <i>SmydA-4</i>    | SmydA | <i>Ceratina calcarata</i> |
| XP_004534872.1 | <i>SmydA-5</i>    | SmydA | <i>Ceratina calcarata</i> |
| XP_004517861.1 | <i>SmydA-6</i>    | SmydA | <i>Ceratina calcarata</i> |
| XP_004517860.1 | <i>SmydA-7</i>    | SmydA | <i>Ceratina calcarata</i> |
| XP_004529471.1 | <i>SmydA-8</i>    | SmydA | <i>Ceratina calcarata</i> |
| XP_012158904.1 | <i>SmydA-8</i>    | SmydA | <i>Ceratina calcarata</i> |
| XP_004529472.1 | <i>SmydA-9</i>    | SmydA | <i>Ceratina calcarata</i> |
| XP_004537028.1 | <i>Su(var)3-9</i> | Suv   | <i>Ceratina calcarata</i> |
| XP_004524323.1 | <i>suv</i>        | Suv   | <i>Ceratina calcarata</i> |
| XP_004534758.1 | <i>trr</i>        | Trx   | <i>Ceratina calcarata</i> |
| XP_004517984.2 | <i>trx</i>        | Trx   | <i>Ceratina calcarata</i> |
| CCAP005187     | -                 | -     | <i>Ceratitis capitata</i> |
| CCAP000782     | <i>ash1</i>       | Ash   | <i>Ceratitis capitata</i> |
| CCAP012803     | <i>Blimp-1</i>    | PRDM  | <i>Ceratitis capitata</i> |
| CCAP003621     | <i>egg</i>        | Suv   | <i>Ceratitis capitata</i> |
| CCAP012789     | <i>Ez</i>         | Ez    | <i>Ceratitis capitata</i> |
| CCAP013011     | <i>G9a</i>        | Suv   | <i>Ceratitis capitata</i> |
| CCAP004663     | <i>Hmt4-20</i>    | -     | <i>Ceratitis capitata</i> |
| CCAP008153     | <i>Mes-4</i>      | Ash   | <i>Ceratitis capitata</i> |
| CCAP014583     | <i>Set1</i>       | Trx   | <i>Ceratitis capitata</i> |
| CCAP004601     | <i>Set2</i>       | Ash   | <i>Ceratitis capitata</i> |
| CCAP007602     | <i>Set8</i>       | -     | <i>Ceratitis capitata</i> |
| CCAP014162     | <i>setd</i>       | SETD  | <i>Ceratitis capitata</i> |
| CCAP010479     | <i>Smyd4-1</i>    | SMYD  | <i>Ceratitis capitata</i> |
| CCAP000083     | <i>Smyd4-2</i>    | SMYD  | <i>Ceratitis capitata</i> |
| CCAP007274     | <i>Smyd4-3</i>    | SMYD  | <i>Ceratitis capitata</i> |
| CCAP007526     | <i>Smyd4-4</i>    | SMYD  | <i>Ceratitis capitata</i> |
| CCAP003276     | <i>Smyd5</i>      | SMYD  | <i>Ceratitis capitata</i> |
| CCAP006624     | <i>SmydA-1</i>    | SmydA | <i>Ceratitis capitata</i> |
| CCAP011991     | <i>SmydA-2</i>    | SmydA | <i>Ceratitis capitata</i> |
| CCAP006471     | <i>SmydA-3</i>    | SmydA | <i>Ceratitis capitata</i> |
| CCAP006469     | <i>SmydA-3</i>    | SmydA | <i>Ceratitis capitata</i> |
| CCAP007277     | <i>SmydA-4</i>    | SmydA | <i>Ceratitis capitata</i> |

|                |                    |       |                           |
|----------------|--------------------|-------|---------------------------|
| CCAP008432     | <i>SmydA-5</i>     | SmydA | <i>Ceratitis capitata</i> |
| CCAP002915     | <i>SmydA-7</i>     | SmydA | <i>Ceratitis capitata</i> |
| CCAP001315     | <i>SmydA-8</i>     | SmydA | <i>Ceratitis capitata</i> |
| CCAP001316     | <i>SmydA-8</i>     | SmydA | <i>Ceratitis capitata</i> |
| CCAP001317     | <i>SmydA-9</i>     | SmydA | <i>Ceratitis capitata</i> |
| CCAP004182     | <i>suv</i>         | Suv   | <i>Ceratitis capitata</i> |
| CCAP008476     | <i>trr</i>         | Trx   | <i>Ceratitis capitata</i> |
| CCAP001677     | <i>trx</i>         | Trx   | <i>Ceratitis capitata</i> |
| CCAP000593     | <i>upSET(MLL5)</i> | -     | <i>Ceratitis capitata</i> |
| XP_011502952.1 | -                  | -     | <i>Ceratosolen solmsi</i> |
| XP_011502301.1 | <i>ash1</i>        | Ash   | <i>Ceratosolen solmsi</i> |
| XP_011498682.1 | <i>Blimp-1</i>     | PRDM  | <i>Ceratosolen solmsi</i> |
| XP_011495749.1 | <i>egg</i>         | Suv   | <i>Ceratosolen solmsi</i> |
| XP_011505015.1 | <i>Ez</i>          | Ez    | <i>Ceratosolen solmsi</i> |
| XP_011498291.1 | <i>Hmt4-20</i>     | -     | <i>Ceratosolen solmsi</i> |
| XP_011503024.1 | <i>Mes-4</i>       | Ash   | <i>Ceratosolen solmsi</i> |
| XP_011500896.1 | <i>Set1</i>        | Trx   | <i>Ceratosolen solmsi</i> |
| XP_011506148.1 | <i>Set2</i>        | Ash   | <i>Ceratosolen solmsi</i> |
| XP_011506141.1 | <i>Set8</i>        | -     | <i>Ceratosolen solmsi</i> |
| XP_011493824.1 | <i>Set8</i>        | -     | <i>Ceratosolen solmsi</i> |
| XP_011503823.1 | <i>setd</i>        | SETD  | <i>Ceratosolen solmsi</i> |
| XP_011497960.1 | <i>Smyd4-2</i>     | SMYD  | <i>Ceratosolen solmsi</i> |
| XP_011498185.1 | <i>Smyd4-3</i>     | SMYD  | <i>Ceratosolen solmsi</i> |
| XP_011502289.1 | <i>Smyd4-3</i>     | SMYD  | <i>Ceratosolen solmsi</i> |
| XP_011502335.1 | <i>Smyd4-3</i>     | SMYD  | <i>Ceratosolen solmsi</i> |
| XP_011504410.1 | <i>Smyd4-3</i>     | SMYD  | <i>Ceratosolen solmsi</i> |
| XP_011493877.1 | <i>Smyd4-4</i>     | SMYD  | <i>Ceratosolen solmsi</i> |
| XP_011502672.1 | <i>Smyd4-4</i>     | SMYD  | <i>Ceratosolen solmsi</i> |
| XP_011496156.1 | <i>Smyd5</i>       | SMYD  | <i>Ceratosolen solmsi</i> |
| XP_011500086.1 | <i>SmydA-1</i>     | SmydA | <i>Ceratosolen solmsi</i> |
| XP_011506599.1 | <i>SmydA-3</i>     | SmydA | <i>Ceratosolen solmsi</i> |
| XP_011494674.1 | <i>SmydA-5</i>     | SmydA | <i>Ceratosolen solmsi</i> |
| XP_011506121.1 | <i>SmydA-8</i>     | SmydA | <i>Ceratosolen solmsi</i> |
| XP_011502402.1 | <i>Su(var)3-9</i>  | Suv   | <i>Ceratosolen solmsi</i> |
| XP_011495370.1 | <i>suv</i>         | Suv   | <i>Ceratosolen solmsi</i> |
| XP_011498084.1 | <i>trr</i>         | Trx   | <i>Ceratosolen solmsi</i> |
| XP_011495095.1 | <i>upSET(MLL5)</i> | -     | <i>Ceratosolen solmsi</i> |
| CLEC001585     | <i>ash1</i>        | Ash   | <i>Cimex lectularius</i>  |
| CLEC009125     | <i>Blimp-1</i>     | PRDM  | <i>Cimex lectularius</i>  |
| CLEC004308     | <i>Blimp-1</i>     | PRDM  | <i>Cimex lectularius</i>  |
| CLEC011550     | <i>egg</i>         | Suv   | <i>Cimex lectularius</i>  |
| CLEC007642     | <i>egg</i>         | Suv   | <i>Cimex lectularius</i>  |
| CLEC007569     | <i>Ez</i>          | Ez    | <i>Cimex lectularius</i>  |
| CLEC007326     | <i>G9a</i>         | Suv   | <i>Cimex lectularius</i>  |

|            |                    |       |                              |
|------------|--------------------|-------|------------------------------|
| CLEC009946 | <i>Hmt4-20</i>     | -     | <i>Cimex lectularius</i>     |
| CLEC000702 | <i>Mes-4</i>       | Ash   | <i>Cimex lectularius</i>     |
| CLEC007543 | <i>Set1</i>        | Trx   | <i>Cimex lectularius</i>     |
| CLEC005584 | <i>Set2</i>        | Ash   | <i>Cimex lectularius</i>     |
| CLEC003862 | <i>Set8</i>        | -     | <i>Cimex lectularius</i>     |
| CLEC011375 | <i>setd</i>        | SETD  | <i>Cimex lectularius</i>     |
| CLEC012489 | <i>Smyd4-2</i>     | SMYD  | <i>Cimex lectularius</i>     |
| CLEC007359 | <i>Smyd4-3</i>     | SMYD  | <i>Cimex lectularius</i>     |
| CLEC006827 | <i>Smyd4-3</i>     | SMYD  | <i>Cimex lectularius</i>     |
| CLEC002426 | <i>Smyd5</i>       | SMYD  | <i>Cimex lectularius</i>     |
| CLEC002375 | <i>SmydA-1</i>     | SmydA | <i>Cimex lectularius</i>     |
| CLEC006315 | <i>SmydA-5</i>     | SmydA | <i>Cimex lectularius</i>     |
| CLEC002827 | <i>Su(var)3-9</i>  | Suv   | <i>Cimex lectularius</i>     |
| CLEC013338 | <i>suv</i>         | Suv   | <i>Cimex lectularius</i>     |
| CLEC009783 | <i>trr</i>         | Trx   | <i>Cimex lectularius</i>     |
| CLEC009544 | <i>trx</i>         | Trx   | <i>Cimex lectularius</i>     |
| CLEC008463 | <i>upSET(MLL5)</i> | -     | <i>Cimex lectularius</i>     |
| CFLO002450 | -                  | -     | <i>Copidosoma floridanum</i> |
| CFLO006696 | -                  | -     | <i>Copidosoma floridanum</i> |
| CFLO013435 | -                  | -     | <i>Copidosoma floridanum</i> |
| CFLO014028 | -                  | -     | <i>Copidosoma floridanum</i> |
| CFLO014497 | -                  | -     | <i>Copidosoma floridanum</i> |
| CFLO016633 | -                  | -     | <i>Copidosoma floridanum</i> |
| CFLO019278 | -                  | -     | <i>Copidosoma floridanum</i> |
| CFLO013589 | -                  | -     | <i>Copidosoma floridanum</i> |
| CFLO018848 | <i>ash1</i>        | Ash   | <i>Copidosoma floridanum</i> |
| CFLO011457 | <i>Blimp-1</i>     | PRDM  | <i>Copidosoma floridanum</i> |
| CFLO000021 | <i>egg</i>         | Suv   | <i>Copidosoma floridanum</i> |
| CFLO001773 | <i>Ez</i>          | Ez    | <i>Copidosoma floridanum</i> |
| CFLO004788 | <i>G9a</i>         | Suv   | <i>Copidosoma floridanum</i> |
| CFLO002689 | <i>Hmt4-20</i>     | -     | <i>Copidosoma floridanum</i> |
| CFLO003741 | <i>Hmt4-20</i>     | -     | <i>Copidosoma floridanum</i> |
| CFLO013278 | <i>Mes-4</i>       | Ash   | <i>Copidosoma floridanum</i> |
| CFLO004334 | <i>Set1</i>        | Trx   | <i>Copidosoma floridanum</i> |
| CFLO010558 | <i>Set2</i>        | Ash   | <i>Copidosoma floridanum</i> |
| CFLO018760 | <i>Set8</i>        | -     | <i>Copidosoma floridanum</i> |
| CFLO018761 | <i>Set8</i>        | -     | <i>Copidosoma floridanum</i> |
| CFLO018087 | <i>setd</i>        | SETD  | <i>Copidosoma floridanum</i> |
| CFLO014410 | <i>Smyd3</i>       | SMYD  | <i>Copidosoma floridanum</i> |
| CFLO011986 | <i>Smyd4-2</i>     | SMYD  | <i>Copidosoma floridanum</i> |
| CFLO012996 | <i>Smyd4-2</i>     | SMYD  | <i>Copidosoma floridanum</i> |
| CFLO012031 | <i>Smyd4-3</i>     | SMYD  | <i>Copidosoma floridanum</i> |
| CFLO015820 | <i>Smyd4-3</i>     | SMYD  | <i>Copidosoma floridanum</i> |
| CFLO019277 | <i>Smyd4-3</i>     | SMYD  | <i>Copidosoma floridanum</i> |

|            |                   |       |                               |
|------------|-------------------|-------|-------------------------------|
| CFLO000957 | <i>Smyd4-4</i>    | SMYD  | <i>Copidosoma floridanum</i>  |
| CFLO000342 | <i>Smyd4-4</i>    | SMYD  | <i>Copidosoma floridanum</i>  |
| CFLO003138 | <i>Smyd4-4</i>    | SMYD  | <i>Copidosoma floridanum</i>  |
| CFLO003687 | <i>Smyd4-4</i>    | SMYD  | <i>Copidosoma floridanum</i>  |
| CFLO005082 | <i>Smyd4-4</i>    | SMYD  | <i>Copidosoma floridanum</i>  |
| CFLO009065 | <i>Smyd4-4</i>    | SMYD  | <i>Copidosoma floridanum</i>  |
| CFLO012998 | <i>Smyd4-4</i>    | SMYD  | <i>Copidosoma floridanum</i>  |
| CFLO016574 | <i>Smyd4-4</i>    | SMYD  | <i>Copidosoma floridanum</i>  |
| CFLO016948 | <i>Smyd4-4</i>    | SMYD  | <i>Copidosoma floridanum</i>  |
| CFLO019783 | <i>Smyd4-4</i>    | SMYD  | <i>Copidosoma floridanum</i>  |
| CFLO015317 | <i>Smyd5</i>      | SMYD  | <i>Copidosoma floridanum</i>  |
| CFLO006650 | <i>SmydA-1</i>    | SmydA | <i>Copidosoma floridanum</i>  |
| CFLO004895 | <i>SmydA-3</i>    | SmydA | <i>Copidosoma floridanum</i>  |
| CFLO007813 | <i>SmydA-5</i>    | SmydA | <i>Copidosoma floridanum</i>  |
| CFLO004833 | <i>SmydA-8</i>    | SmydA | <i>Copidosoma floridanum</i>  |
| CFLO018747 | <i>Su(var)3-9</i> | Suv   | <i>Copidosoma floridanum</i>  |
| CFLO007195 | <i>suv</i>        | Suv   | <i>Copidosoma floridanum</i>  |
| CFLO003342 | <i>trr</i>        | Trx   | <i>Copidosoma floridanum</i>  |
| CPIJ000813 | -                 | -     | <i>Culex quinquefasciatus</i> |
| CPIJ000814 | -                 | -     | <i>Culex quinquefasciatus</i> |
| CPIJ010019 | -                 | -     | <i>Culex quinquefasciatus</i> |
| CPIJ006423 | -                 | -     | <i>Culex quinquefasciatus</i> |
| CPIJ007342 | -                 | -     | <i>Culex quinquefasciatus</i> |
| CPIJ001202 | <i>ash1</i>       | Ash   | <i>Culex quinquefasciatus</i> |
| CPIJ007425 | <i>Blimp-1</i>    | PRDM  | <i>Culex quinquefasciatus</i> |
| CPIJ016652 | <i>egg</i>        | Suv   | <i>Culex quinquefasciatus</i> |
| CPIJ006484 | <i>Ez</i>         | Ez    | <i>Culex quinquefasciatus</i> |
| CPIJ018501 | <i>Hmt4-20</i>    | -     | <i>Culex quinquefasciatus</i> |
| CPIJ011088 | <i>Mes-4</i>      | Ash   | <i>Culex quinquefasciatus</i> |
| CPIJ004932 | <i>Mes-4</i>      | Ash   | <i>Culex quinquefasciatus</i> |
| CPIJ006629 | <i>Mes-4</i>      | Ash   | <i>Culex quinquefasciatus</i> |
| CPIJ013265 | <i>Mes-4</i>      | Ash   | <i>Culex quinquefasciatus</i> |
| CPIJ016171 | <i>Mes-4</i>      | Ash   | <i>Culex quinquefasciatus</i> |
| CPIJ016632 | <i>Mes-4</i>      | Ash   | <i>Culex quinquefasciatus</i> |
| CPIJ016840 | <i>Mes-4</i>      | Ash   | <i>Culex quinquefasciatus</i> |
| CPIJ017018 | <i>Mes-4</i>      | Ash   | <i>Culex quinquefasciatus</i> |
| CPIJ018290 | <i>Mes-4</i>      | Ash   | <i>Culex quinquefasciatus</i> |
| CPIJ019579 | <i>Mes-4</i>      | Ash   | <i>Culex quinquefasciatus</i> |
| CPIJ019697 | <i>Mes-4</i>      | Ash   | <i>Culex quinquefasciatus</i> |
| CPIJ013516 | <i>Set1</i>       | Trx   | <i>Culex quinquefasciatus</i> |
| CPIJ000435 | <i>Set1</i>       | Trx   | <i>Culex quinquefasciatus</i> |
| CPIJ009561 | <i>Set1</i>       | Trx   | <i>Culex quinquefasciatus</i> |
| CPIJ009853 | <i>Set1</i>       | Trx   | <i>Culex quinquefasciatus</i> |
| CPIJ011937 | <i>Set1</i>       | Trx   | <i>Culex quinquefasciatus</i> |

|            |                |      |                               |
|------------|----------------|------|-------------------------------|
| CPIJ013517 | <i>Set1</i>    | Trx  | <i>Culex quinquefasciatus</i> |
| CPIJ018240 | <i>Set1</i>    | Trx  | <i>Culex quinquefasciatus</i> |
| CPIJ005876 | <i>Set2</i>    | Ash  | <i>Culex quinquefasciatus</i> |
| CPIJ000732 | <i>Set8</i>    | -    | <i>Culex quinquefasciatus</i> |
| CPIJ009666 | <i>setd</i>    | SETD | <i>Culex quinquefasciatus</i> |
| CPIJ009352 | <i>Smyd4-1</i> | SMYD | <i>Culex quinquefasciatus</i> |
| CPIJ007239 | <i>Smyd4-2</i> | SMYD | <i>Culex quinquefasciatus</i> |
| CPIJ015708 | <i>Smyd4-3</i> | SMYD | <i>Culex quinquefasciatus</i> |
| CPIJ015707 | <i>Smyd4-3</i> | SMYD | <i>Culex quinquefasciatus</i> |
| CPIJ006452 | <i>Smyd4-4</i> | SMYD | <i>Culex quinquefasciatus</i> |
| CPIJ000744 | <i>Smyd4-4</i> | SMYD | <i>Culex quinquefasciatus</i> |
| CPIJ000812 | <i>Smyd4-4</i> | SMYD | <i>Culex quinquefasciatus</i> |
| CPIJ000815 | <i>Smyd4-4</i> | SMYD | <i>Culex quinquefasciatus</i> |
| CPIJ002821 | <i>Smyd4-4</i> | SMYD | <i>Culex quinquefasciatus</i> |
| CPIJ002828 | <i>Smyd4-4</i> | SMYD | <i>Culex quinquefasciatus</i> |
| CPIJ004426 | <i>Smyd4-4</i> | SMYD | <i>Culex quinquefasciatus</i> |
| CPIJ004427 | <i>Smyd4-4</i> | SMYD | <i>Culex quinquefasciatus</i> |
| CPIJ004428 | <i>Smyd4-4</i> | SMYD | <i>Culex quinquefasciatus</i> |
| CPIJ004429 | <i>Smyd4-4</i> | SMYD | <i>Culex quinquefasciatus</i> |
| CPIJ004431 | <i>Smyd4-4</i> | SMYD | <i>Culex quinquefasciatus</i> |
| CPIJ006454 | <i>Smyd4-4</i> | SMYD | <i>Culex quinquefasciatus</i> |
| CPIJ006490 | <i>Smyd4-4</i> | SMYD | <i>Culex quinquefasciatus</i> |
| CPIJ006632 | <i>Smyd4-4</i> | SMYD | <i>Culex quinquefasciatus</i> |
| CPIJ006635 | <i>Smyd4-4</i> | SMYD | <i>Culex quinquefasciatus</i> |
| CPIJ006636 | <i>Smyd4-4</i> | SMYD | <i>Culex quinquefasciatus</i> |
| CPIJ006637 | <i>Smyd4-4</i> | SMYD | <i>Culex quinquefasciatus</i> |
| CPIJ006638 | <i>Smyd4-4</i> | SMYD | <i>Culex quinquefasciatus</i> |
| CPIJ006641 | <i>Smyd4-4</i> | SMYD | <i>Culex quinquefasciatus</i> |
| CPIJ007544 | <i>Smyd4-4</i> | SMYD | <i>Culex quinquefasciatus</i> |
| CPIJ008045 | <i>Smyd4-4</i> | SMYD | <i>Culex quinquefasciatus</i> |
| CPIJ009784 | <i>Smyd4-4</i> | SMYD | <i>Culex quinquefasciatus</i> |
| CPIJ010143 | <i>Smyd4-4</i> | SMYD | <i>Culex quinquefasciatus</i> |
| CPIJ010371 | <i>Smyd4-4</i> | SMYD | <i>Culex quinquefasciatus</i> |
| CPIJ010372 | <i>Smyd4-4</i> | SMYD | <i>Culex quinquefasciatus</i> |
| CPIJ011021 | <i>Smyd4-4</i> | SMYD | <i>Culex quinquefasciatus</i> |
| CPIJ011686 | <i>Smyd4-4</i> | SMYD | <i>Culex quinquefasciatus</i> |
| CPIJ012096 | <i>Smyd4-4</i> | SMYD | <i>Culex quinquefasciatus</i> |
| CPIJ014755 | <i>Smyd4-4</i> | SMYD | <i>Culex quinquefasciatus</i> |
| CPIJ014756 | <i>Smyd4-4</i> | SMYD | <i>Culex quinquefasciatus</i> |
| CPIJ014757 | <i>Smyd4-4</i> | SMYD | <i>Culex quinquefasciatus</i> |
| CPIJ014758 | <i>Smyd4-4</i> | SMYD | <i>Culex quinquefasciatus</i> |
| CPIJ015565 | <i>Smyd4-4</i> | SMYD | <i>Culex quinquefasciatus</i> |
| CPIJ017838 | <i>Smyd4-4</i> | SMYD | <i>Culex quinquefasciatus</i> |
| CPIJ019668 | <i>Smyd4-4</i> | SMYD | <i>Culex quinquefasciatus</i> |



|              |                    |       |                               |
|--------------|--------------------|-------|-------------------------------|
| CPIJ007481   | <i>Smyd5</i>       | SMYD  | <i>Culex quinquefasciatus</i> |
| CPIJ015254   | <i>SmydA-2</i>     | SmydA | <i>Culex quinquefasciatus</i> |
| CPIJ000970   | <i>SmydA-3</i>     | SmydA | <i>Culex quinquefasciatus</i> |
| CPIJ013580   | <i>SmydA-4</i>     | SmydA | <i>Culex quinquefasciatus</i> |
| CPIJ014160   | <i>SmydA-6</i>     | SmydA | <i>Culex quinquefasciatus</i> |
| CPIJ018500   | <i>SmydA-8</i>     | SmydA | <i>Culex quinquefasciatus</i> |
| CPIJ008357   | <i>SmydA-8</i>     | SmydA | <i>Culex quinquefasciatus</i> |
| CPIJ019323   | <i>Su(var)3-9</i>  | Suv   | <i>Culex quinquefasciatus</i> |
| CPIJ011192   | <i>trr</i>         | Trx   | <i>Culex quinquefasciatus</i> |
| CPIJ013971   | <i>trx</i>         | Trx   | <i>Culex quinquefasciatus</i> |
| CPIJ005719   | <i>upSET(MLL5)</i> | -     | <i>Culex quinquefasciatus</i> |
| DPGLEAN13830 | <i>ash1</i>        | Ash   | <i>Danaus plexippus</i>       |
| DPGLEAN16647 | <i>Blimp-1</i>     | PRDM  | <i>Danaus plexippus</i>       |
| DPGLEAN01117 | <i>egg</i>         | Suv   | <i>Danaus plexippus</i>       |
| DPGLEAN22333 | <i>egg</i>         | Suv   | <i>Danaus plexippus</i>       |
| DPGLEAN10295 | <i>Ez</i>          | Ez    | <i>Danaus plexippus</i>       |
| DPGLEAN13671 | <i>G9a</i>         | Suv   | <i>Danaus plexippus</i>       |
| DPGLEAN05424 | <i>Hmt4-20</i>     | -     | <i>Danaus plexippus</i>       |
| DPGLEAN14526 | <i>Mes-4</i>       | Ash   | <i>Danaus plexippus</i>       |
| DPGLEAN15585 | <i>Set1</i>        | Trx   | <i>Danaus plexippus</i>       |
| DPGLEAN00591 | <i>Set2</i>        | Ash   | <i>Danaus plexippus</i>       |
| DPGLEAN15467 | <i>Set8</i>        | -     | <i>Danaus plexippus</i>       |
| DPGLEAN04058 | <i>setd</i>        | SETD  | <i>Danaus plexippus</i>       |
| DPGLEAN08794 | <i>Smyd4-1</i>     | SMYD  | <i>Danaus plexippus</i>       |
| DPGLEAN14035 | <i>Smyd4-2</i>     | SMYD  | <i>Danaus plexippus</i>       |
| DPGLEAN11275 | <i>Smyd4-3</i>     | SMYD  | <i>Danaus plexippus</i>       |
| DPGLEAN11009 | <i>Smyd4-4</i>     | SMYD  | <i>Danaus plexippus</i>       |
| DPGLEAN16822 | <i>Smyd5</i>       | SMYD  | <i>Danaus plexippus</i>       |
| DPGLEAN20849 | <i>SmydA-1</i>     | SmydA | <i>Danaus plexippus</i>       |
| DPGLEAN13875 | <i>SmydA-2</i>     | SmydA | <i>Danaus plexippus</i>       |
| DPGLEAN22194 | <i>SmydA-3</i>     | SmydA | <i>Danaus plexippus</i>       |
| DPGLEAN04190 | <i>SmydA-4</i>     | SmydA | <i>Danaus plexippus</i>       |
| DPGLEAN13877 | <i>SmydA-5</i>     | SmydA | <i>Danaus plexippus</i>       |
| DPGLEAN22198 | <i>SmydA-6</i>     | SmydA | <i>Danaus plexippus</i>       |
| DPGLEAN20152 | <i>SmydA-8</i>     | SmydA | <i>Danaus plexippus</i>       |
| DPGLEAN18698 | <i>Su(var)3-9</i>  | Suv   | <i>Danaus plexippus</i>       |
| DPGLEAN21423 | <i>suv</i>         | Suv   | <i>Danaus plexippus</i>       |
| DPGLEAN14792 | <i>trr</i>         | Trx   | <i>Danaus plexippus</i>       |
| DPGLEAN21663 | <i>trx</i>         | Trx   | <i>Danaus plexippus</i>       |
| DPGLEAN21857 | <i>upSET(MLL5)</i> | -     | <i>Danaus plexippus</i>       |
| KZS21850.1   | -                  | -     | <i>Daphnia magna</i>          |
| KZS04467.1   | -                  | -     | <i>Daphnia magna</i>          |
| KZS17141.1   | <i>ash1</i>        | Ash   | <i>Daphnia magna</i>          |
| KZS14461.1   | <i>Blimp-1</i>     | PRDM  | <i>Daphnia magna</i>          |

|            |                    |       |                      |
|------------|--------------------|-------|----------------------|
| KZS16476.1 | <i>egg</i>         | Suv   | <i>Daphnia magna</i> |
| KZS19503.1 | <i>egg</i>         | Suv   | <i>Daphnia magna</i> |
| KZS17283.1 | <i>Ez</i>          | Ez    | <i>Daphnia magna</i> |
| KZS14880.1 | <i>G9a</i>         | Suv   | <i>Daphnia magna</i> |
| KZS07084.1 | <i>Hmt4-20</i>     | -     | <i>Daphnia magna</i> |
| KZS12602.1 | <i>Mes-4</i>       | Ash   | <i>Daphnia magna</i> |
| KZS16419.1 | <i>Set1</i>        | Trx   | <i>Daphnia magna</i> |
| KZS07868.1 | <i>Set2</i>        | Ash   | <i>Daphnia magna</i> |
| KZS15065.1 | <i>Set8</i>        | -     | <i>Daphnia magna</i> |
| KZS12928.1 | <i>setd</i>        | SETD  | <i>Daphnia magna</i> |
| KZS21738.1 | <i>Smyd3</i>       | SMYD  | <i>Daphnia magna</i> |
| KZS11370.1 | <i>Smyd4-1</i>     | SMYD  | <i>Daphnia magna</i> |
| KZS12439.1 | <i>Smyd4-2</i>     | SMYD  | <i>Daphnia magna</i> |
| KZS18458.1 | <i>Smyd4-3</i>     | SMYD  | <i>Daphnia magna</i> |
| KZS08827.1 | <i>Smyd4-3</i>     | SMYD  | <i>Daphnia magna</i> |
| KZS12493.1 | <i>Smyd4-3</i>     | SMYD  | <i>Daphnia magna</i> |
| KZS15207.1 | <i>Smyd5</i>       | SMYD  | <i>Daphnia magna</i> |
| KZS05857.1 | <i>SmydA-2</i>     | SmydA | <i>Daphnia magna</i> |
| KZS13858.1 | <i>SmydA-2</i>     | SmydA | <i>Daphnia magna</i> |
| KZS13857.1 | <i>SmydA-3</i>     | SmydA | <i>Daphnia magna</i> |
| KZS11712.1 | <i>SmydA-4</i>     | SmydA | <i>Daphnia magna</i> |
| KZS11713.1 | <i>SmydA-4</i>     | SmydA | <i>Daphnia magna</i> |
| KZS18976.1 | <i>SmydA-4</i>     | SmydA | <i>Daphnia magna</i> |
| KZS16965.1 | <i>Su(var)3-9</i>  | Suv   | <i>Daphnia magna</i> |
| KZS17710.1 | <i>trr</i>         | Trx   | <i>Daphnia magna</i> |
| KZS15953.1 | <i>trx</i>         | Trx   | <i>Daphnia magna</i> |
| KZS05732.1 | <i>upSET(MLL5)</i> | -     | <i>Daphnia magna</i> |
| 58066      | -                  | -     | <i>Daphnia pulex</i> |
| 39415      | <i>ash1</i>        | Ash   | <i>Daphnia pulex</i> |
| 52261      | <i>Blimp-1</i>     | PRDM  | <i>Daphnia pulex</i> |
| 6489       | <i>Blimp-1</i>     | PRDM  | <i>Daphnia pulex</i> |
| 304216     | <i>egg</i>         | Suv   | <i>Daphnia pulex</i> |
| 303556     | <i>egg</i>         | Suv   | <i>Daphnia pulex</i> |
| 300071     | <i>Ez</i>          | Ez    | <i>Daphnia pulex</i> |
| 67185      | <i>Ez</i>          | Ez    | <i>Daphnia pulex</i> |
| 96728      | <i>G9a</i>         | Suv   | <i>Daphnia pulex</i> |
| 329141     | <i>Hmt4-20</i>     | -     | <i>Daphnia pulex</i> |
| 308851     | <i>Mes-4</i>       | Ash   | <i>Daphnia pulex</i> |
| 301653     | <i>Set1</i>        | Trx   | <i>Daphnia pulex</i> |
| 319776     | <i>Set2</i>        | Ash   | <i>Daphnia pulex</i> |
| 311914     | <i>Set8</i>        | -     | <i>Daphnia pulex</i> |
| 317395     | <i>setd</i>        | SETD  | <i>Daphnia pulex</i> |
| 309882     | <i>Smyd4-2</i>     | SMYD  | <i>Daphnia pulex</i> |
| 68494      | <i>Smyd4-3</i>     | SMYD  | <i>Daphnia pulex</i> |

|          |                    |                    |                                |                                |
|----------|--------------------|--------------------|--------------------------------|--------------------------------|
|          | 221129             | <i>Smyd4-3</i>     | SMYD                           | <i>Daphnia pulex</i>           |
|          | 305694             | <i>Smyd4-3</i>     | SMYD                           | <i>Daphnia pulex</i>           |
|          | 312722             | <i>Smyd4-3</i>     | SMYD                           | <i>Daphnia pulex</i>           |
|          | 300033             | <i>Smyd5</i>       | SMYD                           | <i>Daphnia pulex</i>           |
|          | 2393               | <i>SmydA-2</i>     | SmydA                          | <i>Daphnia pulex</i>           |
|          | 194440             | <i>SmydA-2</i>     | SmydA                          | <i>Daphnia pulex</i>           |
|          | 98275              | <i>SmydA-2</i>     | SmydA                          | <i>Daphnia pulex</i>           |
|          | 237516             | <i>SmydA-3</i>     | SmydA                          | <i>Daphnia pulex</i>           |
|          | 120473             | <i>SmydA-4</i>     | SmydA                          | <i>Daphnia pulex</i>           |
|          | 314752             | <i>SmydA-4</i>     | SmydA                          | <i>Daphnia pulex</i>           |
|          | 306854             | <i>Su(var)3-9</i>  | Suv                            | <i>Daphnia pulex</i>           |
|          | 41537              | <i>suv</i>         | Suv                            | <i>Daphnia pulex</i>           |
|          | 51465              | <i>trr</i>         | Trx                            | <i>Daphnia pulex</i>           |
|          | 105888             | <i>trx</i>         | Trx                            | <i>Daphnia pulex</i>           |
|          | 219571             | <i>upSET(MLL5)</i> | -                              | <i>Daphnia pulex</i>           |
| ENN71551 | -                  | -                  | -                              | <i>Dendroctonus ponderosae</i> |
| ENN74965 | <i>ash1</i>        | Ash                | <i>Dendroctonus ponderosae</i> |                                |
| ENN77198 | <i>Blimp-1</i>     | PRDM               | <i>Dendroctonus ponderosae</i> |                                |
| ENN78407 | <i>Ez</i>          | Ez                 | <i>Dendroctonus ponderosae</i> |                                |
| ENN73908 | <i>G9a</i>         | Suv                | <i>Dendroctonus ponderosae</i> |                                |
| ENN80962 | <i>Hmt4-20</i>     | -                  | <i>Dendroctonus ponderosae</i> |                                |
| ENN80424 | <i>Mes-4</i>       | Ash                | <i>Dendroctonus ponderosae</i> |                                |
| ENN77633 | <i>Set1</i>        | Trx                | <i>Dendroctonus ponderosae</i> |                                |
| ENN76193 | <i>Set2</i>        | Ash                | <i>Dendroctonus ponderosae</i> |                                |
| ENN71873 | <i>Set8</i>        | -                  | <i>Dendroctonus ponderosae</i> |                                |
| ENN71869 | <i>Set8</i>        | -                  | <i>Dendroctonus ponderosae</i> |                                |
| ENN78865 | <i>setd</i>        | SETD               | <i>Dendroctonus ponderosae</i> |                                |
| ENN79834 | <i>Smyd4-1</i>     | SMYD               | <i>Dendroctonus ponderosae</i> |                                |
| ENN76352 | <i>Smyd4-3</i>     | SMYD               | <i>Dendroctonus ponderosae</i> |                                |
| ENN71187 | <i>Smyd4-4</i>     | SMYD               | <i>Dendroctonus ponderosae</i> |                                |
| ENN70296 | <i>Smyd4-4</i>     | SMYD               | <i>Dendroctonus ponderosae</i> |                                |
| ENN81878 | <i>Smyd5</i>       | SMYD               | <i>Dendroctonus ponderosae</i> |                                |
| ENN77956 | <i>SmydA-1</i>     | SmydA              | <i>Dendroctonus ponderosae</i> |                                |
| ENN70601 | <i>SmydA-1</i>     | SmydA              | <i>Dendroctonus ponderosae</i> |                                |
| ENN76494 | <i>SmydA-3</i>     | SmydA              | <i>Dendroctonus ponderosae</i> |                                |
| ENN81700 | <i>SmydA-4</i>     | SmydA              | <i>Dendroctonus ponderosae</i> |                                |
| ENN70591 | <i>SmydA-4</i>     | SmydA              | <i>Dendroctonus ponderosae</i> |                                |
| ENN76549 | <i>SmydA-5</i>     | SmydA              | <i>Dendroctonus ponderosae</i> |                                |
| ENN76550 | <i>SmydA-5</i>     | SmydA              | <i>Dendroctonus ponderosae</i> |                                |
| ENN75282 | <i>Su(var)3-9</i>  | Suv                | <i>Dendroctonus ponderosae</i> |                                |
| ENN71731 | <i>suv</i>         | Suv                | <i>Dendroctonus ponderosae</i> |                                |
| ENN73813 | <i>trr</i>         | Trx                | <i>Dendroctonus ponderosae</i> |                                |
| ENN74118 | <i>trx</i>         | Trx                | <i>Dendroctonus ponderosae</i> |                                |
| ENN75450 | <i>upSET(MLL5)</i> | -                  | <i>Dendroctonus ponderosae</i> |                                |

|                |                    |       |                             |
|----------------|--------------------|-------|-----------------------------|
| XP_008482060.1 | -                  | -     | <i>Diaphorina citri</i>     |
| XP_017298542.1 | <i>Blimp-1</i>     | PRDM  | <i>Diaphorina citri</i>     |
| XP_008485751.1 | <i>egg</i>         | Suv   | <i>Diaphorina citri</i>     |
| XP_017304681.1 | <i>Ez</i>          | Ez    | <i>Diaphorina citri</i>     |
| XP_008486547.1 | <i>Ez</i>          | Ez    | <i>Diaphorina citri</i>     |
| XP_008472704.1 | <i>Hmt4-20</i>     | -     | <i>Diaphorina citri</i>     |
| XP_017305347.1 | <i>Mes-4</i>       | Ash   | <i>Diaphorina citri</i>     |
| XP_017305346.1 | <i>Mes-4</i>       | Ash   | <i>Diaphorina citri</i>     |
| XP_008476254.1 | <i>Set1</i>        | Trx   | <i>Diaphorina citri</i>     |
| XP_008472211.1 | <i>Set2</i>        | Ash   | <i>Diaphorina citri</i>     |
| XP_008486199.1 | <i>Set2</i>        | Ash   | <i>Diaphorina citri</i>     |
| XP_008471055.1 | <i>Set8</i>        | -     | <i>Diaphorina citri</i>     |
| XP_008473256.1 | <i>Smyd4-2</i>     | SMYD  | <i>Diaphorina citri</i>     |
| XP_017300041.1 | <i>Smyd4-3</i>     | SMYD  | <i>Diaphorina citri</i>     |
| XP_008478651.1 | <i>Smyd4-3</i>     | SMYD  | <i>Diaphorina citri</i>     |
| XP_017300620.1 | <i>SmydA-1</i>     | SmydA | <i>Diaphorina citri</i>     |
| XP_017302778.1 | <i>SmydA-2</i>     | SmydA | <i>Diaphorina citri</i>     |
| XP_017303780.1 | <i>SmydA-3</i>     | SmydA | <i>Diaphorina citri</i>     |
| XP_008480211.1 | <i>SmydA-4</i>     | SmydA | <i>Diaphorina citri</i>     |
| XP_008476173.1 | <i>SmydA-5</i>     | SmydA | <i>Diaphorina citri</i>     |
| XP_017303757.1 | <i>SmydA-6</i>     | SmydA | <i>Diaphorina citri</i>     |
| XP_008467522.1 | <i>SmydA-8</i>     | SmydA | <i>Diaphorina citri</i>     |
| XP_017297848.1 | <i>Su(var)3-9</i>  | Suv   | <i>Diaphorina citri</i>     |
| XP_017304938.1 | <i>Su(var)3-9</i>  | Suv   | <i>Diaphorina citri</i>     |
| XP_017300763.1 | <i>suv</i>         | Suv   | <i>Diaphorina citri</i>     |
| XP_008474986.1 | <i>trr</i>         | Trx   | <i>Diaphorina citri</i>     |
| XP_008467635.1 | <i>trx</i>         | Trx   | <i>Diaphorina citri</i>     |
| XP_017305099.1 | <i>upSET(MLL5)</i> | -     | <i>Diaphorina citri</i>     |
| GF10724        | <i>ash1</i>        | Ash   | <i>Drosophila ananassae</i> |
| GF23985        | <i>Blimp-1</i>     | PRDM  | <i>Drosophila ananassae</i> |
| GF11546        | <i>egg</i>         | Suv   | <i>Drosophila ananassae</i> |
| GF23825        | <i>Ez</i>          | Ez    | <i>Drosophila ananassae</i> |
| GF21998        | <i>G9a</i>         | Suv   | <i>Drosophila ananassae</i> |
| GF21991        | <i>Hmt4-20</i>     | -     | <i>Drosophila ananassae</i> |
| GF16138        | <i>Mes-4</i>       | Ash   | <i>Drosophila ananassae</i> |
| GF23123        | <i>Set1</i>        | Trx   | <i>Drosophila ananassae</i> |
| GF22528        | <i>Set2</i>        | Ash   | <i>Drosophila ananassae</i> |
| GF17507        | <i>Set8</i>        | -     | <i>Drosophila ananassae</i> |
| GF12496        | <i>Smyd4-1</i>     | SMYD  | <i>Drosophila ananassae</i> |
| GF24983        | <i>Smyd4-2</i>     | SMYD  | <i>Drosophila ananassae</i> |
| GF12554        | <i>Smyd4-3</i>     | SMYD  | <i>Drosophila ananassae</i> |
| GF12292        | <i>Smyd4-4</i>     | SMYD  | <i>Drosophila ananassae</i> |
| GF23162        | <i>Smyd5</i>       | SMYD  | <i>Drosophila ananassae</i> |
| GF13486        | <i>SmydA-1</i>     | SmydA | <i>Drosophila ananassae</i> |

|            |                    |       |                               |
|------------|--------------------|-------|-------------------------------|
| GF10789    | <i>SmydA-2</i>     | SmydA | <i>Drosophila ananassae</i>   |
| GF15829    | <i>SmydA-3</i>     | SmydA | <i>Drosophila ananassae</i>   |
| GF20287    | <i>SmydA-4</i>     | SmydA | <i>Drosophila ananassae</i>   |
| GF16861    | <i>SmydA-5</i>     | SmydA | <i>Drosophila ananassae</i>   |
| GF11433    | <i>SmydA-6</i>     | SmydA | <i>Drosophila ananassae</i>   |
| GF21975    | <i>SmydA-8</i>     | SmydA | <i>Drosophila ananassae</i>   |
| GF21974    | <i>SmydA-8</i>     | SmydA | <i>Drosophila ananassae</i>   |
| GF19100    | <i>SmydA-9</i>     | SmydA | <i>Drosophila ananassae</i>   |
| GF11769    | <i>Su(var)3-9</i>  | Suv   | <i>Drosophila ananassae</i>   |
| GF17909    | <i>suv</i>         | Suv   | <i>Drosophila ananassae</i>   |
| GF19475    | <i>trr</i>         | Trx   | <i>Drosophila ananassae</i>   |
| GF23177    | <i>trx</i>         | Trx   | <i>Drosophila ananassae</i>   |
| GF24057    | <i>upSET(MLL5)</i> | -     | <i>Drosophila ananassae</i>   |
| DBIA011526 | <i>ash1</i>        | Ash   | <i>Drosophila biarmipes</i>   |
| DBIA003686 | <i>Blimp-1</i>     | PRDM  | <i>Drosophila biarmipes</i>   |
| DBIA004550 | <i>egg</i>         | Suv   | <i>Drosophila biarmipes</i>   |
| DBIA000786 | <i>Ez</i>          | Ez    | <i>Drosophila biarmipes</i>   |
| DBIA005583 | <i>G9a</i>         | Suv   | <i>Drosophila biarmipes</i>   |
| DBIA005574 | <i>Hmt4-20</i>     | -     | <i>Drosophila biarmipes</i>   |
| DBIA005413 | <i>Mes-4</i>       | Ash   | <i>Drosophila biarmipes</i>   |
| DBIA014121 | <i>Set1</i>        | Trx   | <i>Drosophila biarmipes</i>   |
| DBIA010304 | <i>Set2</i>        | Ash   | <i>Drosophila biarmipes</i>   |
| DBIA015038 | <i>Set2</i>        | Ash   | <i>Drosophila biarmipes</i>   |
| DBIA005443 | <i>Set8</i>        | -     | <i>Drosophila biarmipes</i>   |
| DBIA005649 | <i>setd</i>        | SETD  | <i>Drosophila biarmipes</i>   |
| DBIA009626 | <i>Smyd4-1</i>     | SMYD  | <i>Drosophila biarmipes</i>   |
| DBIA000577 | <i>Smyd4-2</i>     | SMYD  | <i>Drosophila biarmipes</i>   |
| DBIA004220 | <i>Smyd4-3</i>     | SMYD  | <i>Drosophila biarmipes</i>   |
| DBIA006152 | <i>Smyd4-4</i>     | SMYD  | <i>Drosophila biarmipes</i>   |
| DBIA008708 | <i>Smyd5</i>       | SMYD  | <i>Drosophila biarmipes</i>   |
| DBIA012884 | <i>SmydA-2</i>     | SmydA | <i>Drosophila biarmipes</i>   |
| DBIA002575 | <i>SmydA-3</i>     | SmydA | <i>Drosophila biarmipes</i>   |
| DBIA007374 | <i>SmydA-4</i>     | SmydA | <i>Drosophila biarmipes</i>   |
| DBIA015092 | <i>SmydA-5</i>     | SmydA | <i>Drosophila biarmipes</i>   |
| DBIA004825 | <i>SmydA-6</i>     | SmydA | <i>Drosophila biarmipes</i>   |
| DBIA005690 | <i>SmydA-8</i>     | SmydA | <i>Drosophila biarmipes</i>   |
| DBIA001618 | <i>Su(var)3-9</i>  | Suv   | <i>Drosophila biarmipes</i>   |
| DBIA002203 | <i>suv</i>         | Suv   | <i>Drosophila biarmipes</i>   |
| DBIA005923 | <i>trr</i>         | Trx   | <i>Drosophila biarmipes</i>   |
| DBIA001478 | <i>trx</i>         | Trx   | <i>Drosophila biarmipes</i>   |
| DBIA000688 | <i>upSET(MLL5)</i> | -     | <i>Drosophila biarmipes</i>   |
| DBIP005101 | <i>ash1</i>        | Ash   | <i>Drosophila bipectinata</i> |
| DBIP003330 | <i>Blimp-1</i>     | PRDM  | <i>Drosophila bipectinata</i> |
| DBIP005298 | <i>egg</i>         | Suv   | <i>Drosophila bipectinata</i> |

|            |                    |            |                               |
|------------|--------------------|------------|-------------------------------|
| DBIP007894 | <i>Ez</i>          | <i>Ez</i>  | <i>Drosophila bipectinata</i> |
| DBIP010902 | <i>G9a</i>         | <i>Suv</i> | <i>Drosophila bipectinata</i> |
| DBIP010914 | <i>Hmt4-20</i>     | -          | <i>Drosophila bipectinata</i> |
| DBIP009384 | <i>Mes-4</i>       | <i>Ash</i> | <i>Drosophila bipectinata</i> |
| DBIP013590 | <i>Set1</i>        | <i>Trx</i> | <i>Drosophila bipectinata</i> |
| DBIP011040 | <i>Set2</i>        | <i>Ash</i> | <i>Drosophila bipectinata</i> |
| DBIP008532 | <i>Set8</i>        | -          | <i>Drosophila bipectinata</i> |
| DBIP010359 | <i>setd</i>        | SETD       | <i>Drosophila bipectinata</i> |
| DBIP002315 | <i>Smyd4-1</i>     | SMYD       | <i>Drosophila bipectinata</i> |
| DBIP005673 | <i>Smyd4-2</i>     | SMYD       | <i>Drosophila bipectinata</i> |
| DBIP002434 | <i>Smyd4-3</i>     | SMYD       | <i>Drosophila bipectinata</i> |
| DBIP003016 | <i>Smyd4-4</i>     | SMYD       | <i>Drosophila bipectinata</i> |
| DBIP007466 | <i>Smyd5</i>       | SMYD       | <i>Drosophila bipectinata</i> |
| DBIP006513 | <i>SmydA-1</i>     | SmydA      | <i>Drosophila bipectinata</i> |
| DBIP005205 | <i>SmydA-2</i>     | SmydA      | <i>Drosophila bipectinata</i> |
| DBIP009899 | <i>SmydA-4</i>     | SmydA      | <i>Drosophila bipectinata</i> |
| DBIP010612 | <i>SmydA-5</i>     | SmydA      | <i>Drosophila bipectinata</i> |
| DBIP002871 | <i>SmydA-6</i>     | SmydA      | <i>Drosophila bipectinata</i> |
| DBIP010941 | <i>SmydA-8</i>     | SmydA      | <i>Drosophila bipectinata</i> |
| DBIP006373 | <i>SmydA-9</i>     | SmydA      | <i>Drosophila bipectinata</i> |
| DBIP001170 | <i>Su(var)3-9</i>  | <i>Suv</i> | <i>Drosophila bipectinata</i> |
| DBIP000248 | <i>suv</i>         | <i>Suv</i> | <i>Drosophila bipectinata</i> |
| DBIP011959 | <i>trr</i>         | <i>Trx</i> | <i>Drosophila bipectinata</i> |
| DBIP007441 | <i>trx</i>         | <i>Trx</i> | <i>Drosophila bipectinata</i> |
| DBIP003443 | <i>upSET(MLL5)</i> | -          | <i>Drosophila bipectinata</i> |
| DELE000710 | <i>ash1</i>        | <i>Ash</i> | <i>Drosophila elegans</i>     |
| DELE010093 | <i>Blimp-1</i>     | PRDM       | <i>Drosophila elegans</i>     |
| DELE001080 | <i>egg</i>         | <i>Suv</i> | <i>Drosophila elegans</i>     |
| DELE006110 | <i>Ez</i>          | <i>Ez</i>  | <i>Drosophila elegans</i>     |
| DELE006766 | <i>G9a</i>         | <i>Suv</i> | <i>Drosophila elegans</i>     |
| DELE006756 | <i>Hmt4-20</i>     | -          | <i>Drosophila elegans</i>     |
| DELE002522 | <i>Mes-4</i>       | <i>Ash</i> | <i>Drosophila elegans</i>     |
| DELE014611 | <i>Set1</i>        | <i>Trx</i> | <i>Drosophila elegans</i>     |
| DELE005122 | <i>Set2</i>        | <i>Ash</i> | <i>Drosophila elegans</i>     |
| DELE007689 | <i>Set8</i>        | -          | <i>Drosophila elegans</i>     |
| DELE008681 | <i>setd</i>        | SETD       | <i>Drosophila elegans</i>     |
| DELE007991 | <i>Smyd4-1</i>     | SMYD       | <i>Drosophila elegans</i>     |
| DELE003489 | <i>Smyd4-2</i>     | SMYD       | <i>Drosophila elegans</i>     |
| DELE001156 | <i>Smyd4-3</i>     | SMYD       | <i>Drosophila elegans</i>     |
| DELE001241 | <i>Smyd4-4</i>     | SMYD       | <i>Drosophila elegans</i>     |
| DELE004218 | <i>Smyd5</i>       | SMYD       | <i>Drosophila elegans</i>     |
| DELE012077 | <i>SmydA-3</i>     | SmydA      | <i>Drosophila elegans</i>     |
| DELE009131 | <i>SmydA-4</i>     | SmydA      | <i>Drosophila elegans</i>     |
| DELE013895 | <i>SmydA-5</i>     | SmydA      | <i>Drosophila elegans</i>     |

|            |                    |       |                              |
|------------|--------------------|-------|------------------------------|
| DELE000984 | <i>SmydA-6</i>     | SmydA | <i>Drosophila elegans</i>    |
| DELE008544 | <i>SmydA-8</i>     | SmydA | <i>Drosophila elegans</i>    |
| DELE013607 | <i>SmydA-9</i>     | SmydA | <i>Drosophila elegans</i>    |
| DELE007522 | <i>Su(var)3-9</i>  | Suv   | <i>Drosophila elegans</i>    |
| DELE008495 | <i>trr</i>         | Trx   | <i>Drosophila elegans</i>    |
| DELE007695 | <i>trx</i>         | Trx   | <i>Drosophila elegans</i>    |
| DELE003651 | <i>upSET(MLL5)</i> | -     | <i>Drosophila elegans</i>    |
| GG13392    | <i>ash1</i>        | Ash   | <i>Drosophila erecta</i>     |
| GG15278    | <i>Blimp-1</i>     | PRDM  | <i>Drosophila erecta</i>     |
| GG19893    | <i>egg</i>         | Suv   | <i>Drosophila erecta</i>     |
| GG13968    | <i>Ez</i>          | Ez    | <i>Drosophila erecta</i>     |
| GG12774    | <i>G9a</i>         | Suv   | <i>Drosophila erecta</i>     |
| GG12748    | <i>Hmt4-20</i>     | -     | <i>Drosophila erecta</i>     |
| GG12082    | <i>Mes-4</i>       | Ash   | <i>Drosophila erecta</i>     |
| GG11901    | <i>Set1</i>        | Trx   | <i>Drosophila erecta</i>     |
| GG17783    | <i>Set2</i>        | Ash   | <i>Drosophila erecta</i>     |
| GG16850    | <i>Set8</i>        | -     | <i>Drosophila erecta</i>     |
| GG17647    | <i>setd</i>        | SETD  | <i>Drosophila erecta</i>     |
| GG25277    | <i>Smyd4-1</i>     | SMYD  | <i>Drosophila erecta</i>     |
| GG13835    | <i>Smyd4-2</i>     | SMYD  | <i>Drosophila erecta</i>     |
| GG20202    | <i>Smyd4-3</i>     | SMYD  | <i>Drosophila erecta</i>     |
| GG20247    | <i>Smyd4-4</i>     | SMYD  | <i>Drosophila erecta</i>     |
| GG14794    | <i>Smyd5</i>       | SMYD  | <i>Drosophila erecta</i>     |
| GG20436    | <i>SmydA-1</i>     | SmydA | <i>Drosophila erecta</i>     |
| GG13432    | <i>SmydA-2</i>     | SmydA | <i>Drosophila erecta</i>     |
| GG23681    | <i>SmydA-3</i>     | SmydA | <i>Drosophila erecta</i>     |
| GG18383    | <i>SmydA-4</i>     | SmydA | <i>Drosophila erecta</i>     |
| GG10833    | <i>SmydA-5</i>     | SmydA | <i>Drosophila erecta</i>     |
| GG20655    | <i>SmydA-6</i>     | SmydA | <i>Drosophila erecta</i>     |
| GG20654    | <i>SmydA-7</i>     | SmydA | <i>Drosophila erecta</i>     |
| GG12639    | <i>SmydA-8</i>     | SmydA | <i>Drosophila erecta</i>     |
| GG12637    | <i>SmydA-8</i>     | SmydA | <i>Drosophila erecta</i>     |
| GG18992    | <i>SmydA-9</i>     | SmydA | <i>Drosophila erecta</i>     |
| GG17759    | <i>suv</i>         | Suv   | <i>Drosophila erecta</i>     |
| GG12672    | <i>trr</i>         | Trx   | <i>Drosophila erecta</i>     |
| GG21380    | <i>trx</i>         | Trx   | <i>Drosophila erecta</i>     |
| GG15666    | <i>upSET(MLL5)</i> | -     | <i>Drosophila erecta</i>     |
| DEUG006429 | <i>ash1</i>        | Ash   | <i>Drosophila eugracilis</i> |
| DEUG002757 | <i>Blimp-1</i>     | PRDM  | <i>Drosophila eugracilis</i> |
| DEUG005809 | <i>egg</i>         | Suv   | <i>Drosophila eugracilis</i> |
| DEUG001284 | <i>Ez</i>          | Ez    | <i>Drosophila eugracilis</i> |
| DEUG006760 | <i>G9a</i>         | Suv   | <i>Drosophila eugracilis</i> |
| DEUG006748 | <i>Hmt4-20</i>     | -     | <i>Drosophila eugracilis</i> |
| DEUG005091 | <i>Mes-4</i>       | Ash   | <i>Drosophila eugracilis</i> |

|            |                    |       |                              |
|------------|--------------------|-------|------------------------------|
| DEUG013778 | <i>Set1</i>        | Trx   | <i>Drosophila eugracilis</i> |
| DEUG011891 | <i>Set2</i>        | Ash   | <i>Drosophila eugracilis</i> |
| DEUG010911 | <i>Set8</i>        | -     | <i>Drosophila eugracilis</i> |
| DEUG009864 | <i>Smyd4-1</i>     | SMYD  | <i>Drosophila eugracilis</i> |
| DEUG002891 | <i>Smyd4-2</i>     | SMYD  | <i>Drosophila eugracilis</i> |
| DEUG003145 | <i>Smyd4-3</i>     | SMYD  | <i>Drosophila eugracilis</i> |
| DEUG003059 | <i>Smyd4-4</i>     | SMYD  | <i>Drosophila eugracilis</i> |
| DEUG003355 | <i>SmydA-1</i>     | SmydA | <i>Drosophila eugracilis</i> |
| DEUG002172 | <i>SmydA-3</i>     | SmydA | <i>Drosophila eugracilis</i> |
| DEUG011681 | <i>SmydA-4</i>     | SmydA | <i>Drosophila eugracilis</i> |
| DEUG011558 | <i>SmydA-5</i>     | SmydA | <i>Drosophila eugracilis</i> |
| DEUG000277 | <i>SmydA-7</i>     | SmydA | <i>Drosophila eugracilis</i> |
| DEUG013190 | <i>SmydA-8</i>     | SmydA | <i>Drosophila eugracilis</i> |
| DEUG012784 | <i>SmydA-8</i>     | SmydA | <i>Drosophila eugracilis</i> |
| DEUG008906 | <i>SmydA-9</i>     | SmydA | <i>Drosophila eugracilis</i> |
| DEUG013066 | <i>Su(var)3-9</i>  | Suv   | <i>Drosophila eugracilis</i> |
| DEUG011271 | <i>trr</i>         | Trx   | <i>Drosophila eugracilis</i> |
| DEUG010918 | <i>trx</i>         | Trx   | <i>Drosophila eugracilis</i> |
| DEUG007119 | <i>upSET(MLL5)</i> | -     | <i>Drosophila eugracilis</i> |
| DFIC010692 | <i>ash1</i>        | Ash   | <i>Drosophila ficusphila</i> |
| DFIC008679 | <i>Blimp-1</i>     | PRDM  | <i>Drosophila ficusphila</i> |
| DFIC005281 | <i>egg</i>         | Suv   | <i>Drosophila ficusphila</i> |
| DFIC008708 | <i>Ez</i>          | Ez    | <i>Drosophila ficusphila</i> |
| DFIC006626 | <i>G9a</i>         | Suv   | <i>Drosophila ficusphila</i> |
| DFIC006613 | <i>Hmt4-20</i>     | -     | <i>Drosophila ficusphila</i> |
| DFIC007323 | <i>Mes-4</i>       | Ash   | <i>Drosophila ficusphila</i> |
| DFIC013431 | <i>Set1</i>        | Trx   | <i>Drosophila ficusphila</i> |
| DFIC005874 | <i>Set2</i>        | Ash   | <i>Drosophila ficusphila</i> |
| DFIC001678 | <i>Set8</i>        | -     | <i>Drosophila ficusphila</i> |
| DFIC006683 | <i>setd</i>        | SETD  | <i>Drosophila ficusphila</i> |
| DFIC005344 | <i>Smyd4-1</i>     | SMYD  | <i>Drosophila ficusphila</i> |
| DFIC004048 | <i>Smyd4-2</i>     | SMYD  | <i>Drosophila ficusphila</i> |
| DFIC011548 | <i>Smyd4-3</i>     | SMYD  | <i>Drosophila ficusphila</i> |
| DFIC008914 | <i>Smyd4-4</i>     | SMYD  | <i>Drosophila ficusphila</i> |
| DFIC006261 | <i>Smyd5</i>       | SMYD  | <i>Drosophila ficusphila</i> |
| DFIC010240 | <i>SmydA-2</i>     | SmydA | <i>Drosophila ficusphila</i> |
| DFIC009417 | <i>SmydA-3</i>     | SmydA | <i>Drosophila ficusphila</i> |
| DFIC007675 | <i>SmydA-4</i>     | SmydA | <i>Drosophila ficusphila</i> |
| DFIC001193 | <i>SmydA-8</i>     | SmydA | <i>Drosophila ficusphila</i> |
| DFIC005735 | <i>SmydA-9</i>     | SmydA | <i>Drosophila ficusphila</i> |
| DFIC006784 | <i>Su(var)3-9</i>  | Suv   | <i>Drosophila ficusphila</i> |
| DFIC001143 | <i>trr</i>         | Trx   | <i>Drosophila ficusphila</i> |
| DFIC001671 | <i>trx</i>         | Trx   | <i>Drosophila ficusphila</i> |
| DFIC009646 | <i>upSET(MLL5)</i> | -     | <i>Drosophila ficusphila</i> |



|            |                    |       |                             |
|------------|--------------------|-------|-----------------------------|
| GH16622    | -                  | -     | <i>Drosophila grimshawi</i> |
| GH14625    | <i>ash1</i>        | Ash   | <i>Drosophila grimshawi</i> |
| GH16462    | <i>Blimp-1</i>     | PRDM  | <i>Drosophila grimshawi</i> |
| GH21540    | <i>egg</i>         | Suv   | <i>Drosophila grimshawi</i> |
| GH16544    | <i>Ez</i>          | Ez    | <i>Drosophila grimshawi</i> |
| GH24232    | <i>G9a</i>         | Suv   | <i>Drosophila grimshawi</i> |
| GH17704    | <i>Hmt4-20</i>     | -     | <i>Drosophila grimshawi</i> |
| GH19166    | <i>Mes-4</i>       | Ash   | <i>Drosophila grimshawi</i> |
| GH22347    | <i>Set1</i>        | Trx   | <i>Drosophila grimshawi</i> |
| GH16034    | <i>Set2</i>        | Ash   | <i>Drosophila grimshawi</i> |
| GH17478    | <i>Set8</i>        | -     | <i>Drosophila grimshawi</i> |
| GH12451    | <i>setd</i>        | SETD  | <i>Drosophila grimshawi</i> |
| GH21957    | <i>Smyd4-1</i>     | SMYD  | <i>Drosophila grimshawi</i> |
| GH16068    | <i>Smyd4-2</i>     | SMYD  | <i>Drosophila grimshawi</i> |
| GH21386    | <i>Smyd4-3</i>     | SMYD  | <i>Drosophila grimshawi</i> |
| GH20862    | <i>Smyd4-4</i>     | SMYD  | <i>Drosophila grimshawi</i> |
| GH18189    | <i>Smyd5</i>       | SMYD  | <i>Drosophila grimshawi</i> |
| GH19808    | <i>SmydA-1</i>     | SmydA | <i>Drosophila grimshawi</i> |
| GH16955    | <i>SmydA-2</i>     | SmydA | <i>Drosophila grimshawi</i> |
| GH13590    | <i>SmydA-3</i>     | SmydA | <i>Drosophila grimshawi</i> |
| GH17917    | <i>SmydA-4</i>     | SmydA | <i>Drosophila grimshawi</i> |
| GH20950    | <i>SmydA-5</i>     | SmydA | <i>Drosophila grimshawi</i> |
| GH22837    | <i>SmydA-6</i>     | SmydA | <i>Drosophila grimshawi</i> |
| GH12314    | <i>SmydA-8</i>     | SmydA | <i>Drosophila grimshawi</i> |
| GH17754    | <i>SmydA-9</i>     | SmydA | <i>Drosophila grimshawi</i> |
| GH18750    | <i>Su(var)3-9</i>  | Suv   | <i>Drosophila grimshawi</i> |
| GH17848    | <i>trr</i>         | Trx   | <i>Drosophila grimshawi</i> |
| GH19675    | <i>trx</i>         | Trx   | <i>Drosophila grimshawi</i> |
| GH16924    | <i>upSET(MLL5)</i> | -     | <i>Drosophila grimshawi</i> |
| DKIK011252 | <i>ash1</i>        | Ash   | <i>Drosophila kikkawai</i>  |
| DKIK012019 | <i>Blimp-1</i>     | PRDM  | <i>Drosophila kikkawai</i>  |
| DKIK008447 | <i>egg</i>         | Suv   | <i>Drosophila kikkawai</i>  |
| DKIK007571 | <i>Ez</i>          | Ez    | <i>Drosophila kikkawai</i>  |
| DKIK003877 | <i>G9a</i>         | Suv   | <i>Drosophila kikkawai</i>  |
| DKIK003556 | <i>Hmt4-20</i>     | -     | <i>Drosophila kikkawai</i>  |
| DKIK002285 | <i>Mes-4</i>       | Ash   | <i>Drosophila kikkawai</i>  |
| DKIK013623 | <i>Set1</i>        | Trx   | <i>Drosophila kikkawai</i>  |
| DKIK005841 | <i>Set2</i>        | Ash   | <i>Drosophila kikkawai</i>  |
| DKIK002038 | <i>Set8</i>        | -     | <i>Drosophila kikkawai</i>  |
| DKIK003896 | <i>setd</i>        | SETD  | <i>Drosophila kikkawai</i>  |
| DKIK000112 | <i>Smyd4-1</i>     | SMYD  | <i>Drosophila kikkawai</i>  |
| DKIK005683 | <i>Smyd4-2</i>     | SMYD  | <i>Drosophila kikkawai</i>  |
| DKIK000033 | <i>Smyd4-3</i>     | SMYD  | <i>Drosophila kikkawai</i>  |
| DKIK003085 | <i>Smyd4-4</i>     | SMYD  | <i>Drosophila kikkawai</i>  |

|                |                    |       |                                |
|----------------|--------------------|-------|--------------------------------|
| DKIK011716     | <i>Smyd5</i>       | SMYD  | <i>Drosophila kikkawai</i>     |
| DKIK008438     | <i>SmydA-1</i>     | SmydA | <i>Drosophila kikkawai</i>     |
| DKIK012860     | <i>SmydA-2</i>     | SmydA | <i>Drosophila kikkawai</i>     |
| DKIK000670     | <i>SmydA-3</i>     | SmydA | <i>Drosophila kikkawai</i>     |
| DKIK011193     | <i>SmydA-4</i>     | SmydA | <i>Drosophila kikkawai</i>     |
| DKIK009956     | <i>SmydA-5</i>     | SmydA | <i>Drosophila kikkawai</i>     |
| DKIK004100     | <i>SmydA-8</i>     | SmydA | <i>Drosophila kikkawai</i>     |
| DKIK004389     | <i>SmydA-9</i>     | SmydA | <i>Drosophila kikkawai</i>     |
| DKIK002140     | <i>Su(var)3-9</i>  | Suv   | <i>Drosophila kikkawai</i>     |
| DKIK010545     | <i>suv</i>         | Suv   | <i>Drosophila kikkawai</i>     |
| DKIK005234     | <i>trr</i>         | Trx   | <i>Drosophila kikkawai</i>     |
| DKIK009928     | <i>trx</i>         | Trx   | <i>Drosophila kikkawai</i>     |
| DKIK001048     | <i>upSET(MLL5)</i> | -     | <i>Drosophila kikkawai</i>     |
| CG8887         | <i>ash1</i>        | Ash   | <i>Drosophila melanogaster</i> |
| CG5249         | <i>Blimp-1</i>     | PRDM  | <i>Drosophila melanogaster</i> |
| CG12196        | <i>egg</i>         | Suv   | <i>Drosophila melanogaster</i> |
| CG6502         | <i>Ez</i>          | Ez    | <i>Drosophila melanogaster</i> |
| CG2995         | <i>G9a</i>         | Suv   | <i>Drosophila melanogaster</i> |
| CG13363        | <i>Hmt4-20</i>     | -     | <i>Drosophila melanogaster</i> |
| CG4976         | <i>Mes-4</i>       | Ash   | <i>Drosophila melanogaster</i> |
| CG40351        | <i>Set1</i>        | Trx   | <i>Drosophila melanogaster</i> |
| CG1716         | <i>Set2</i>        | Ash   | <i>Drosophila melanogaster</i> |
| CG3307         | <i>Set8</i>        | -     | <i>Drosophila melanogaster</i> |
| CG32732        | <i>setd</i>        | SETD  | <i>Drosophila melanogaster</i> |
| CG1868         | <i>Smyd4-1</i>     | SMYD  | <i>Drosophila melanogaster</i> |
| CG14122        | <i>Smyd4-2</i>     | SMYD  | <i>Drosophila melanogaster</i> |
| CG7759         | <i>Smyd4-3</i>     | SMYD  | <i>Drosophila melanogaster</i> |
| CG8378         | <i>Smyd4-4</i>     | SMYD  | <i>Drosophila melanogaster</i> |
| CG3353         | <i>Smyd5</i>       | SMYD  | <i>Drosophila melanogaster</i> |
| CG8503         | <i>SmydA-1</i>     | SmydA | <i>Drosophila melanogaster</i> |
| CG18136        | <i>SmydA-2</i>     | SmydA | <i>Drosophila melanogaster</i> |
| CG43129        | <i>SmydA-3</i>     | SmydA | <i>Drosophila melanogaster</i> |
| CG11160        | <i>SmydA-4</i>     | SmydA | <i>Drosophila melanogaster</i> |
| CG14590        | <i>SmydA-5</i>     | SmydA | <i>Drosophila melanogaster</i> |
| CG9642         | <i>SmydA-6</i>     | SmydA | <i>Drosophila melanogaster</i> |
| CG9640         | <i>SmydA-7</i>     | SmydA | <i>Drosophila melanogaster</i> |
| CG33548        | <i>SmydA-8</i>     | SmydA | <i>Drosophila melanogaster</i> |
| CG12119        | <i>SmydA-9</i>     | SmydA | <i>Drosophila melanogaster</i> |
| CG43664        | <i>Su(var)3-9</i>  | Suv   | <i>Drosophila melanogaster</i> |
| CG4565         | <i>suv</i>         | Suv   | <i>Drosophila melanogaster</i> |
| CG3848         | <i>trr</i>         | Trx   | <i>Drosophila melanogaster</i> |
| CG8651         | <i>trx</i>         | Trx   | <i>Drosophila melanogaster</i> |
| CG9007         | <i>upSET(MLL5)</i> | -     | <i>Drosophila melanogaster</i> |
| XP_017135172.1 | <i>ash1</i>        | Ash   | <i>Drosophila miranda</i>      |

|                |                    |       |                              |
|----------------|--------------------|-------|------------------------------|
| XP_017147643.1 | <i>egg</i>         | Suv   | <i>Drosophila miranda</i>    |
| XP_017135503.1 | <i>Ez</i>          | Ez    | <i>Drosophila miranda</i>    |
| XP_017156014.1 | <i>Hmt4-20</i>     | -     | <i>Drosophila miranda</i>    |
| XP_017141202.1 | <i>Mes-4</i>       | Ash   | <i>Drosophila miranda</i>    |
| XP_017140974.1 | <i>Set1</i>        | Trx   | <i>Drosophila miranda</i>    |
| XP_017142962.1 | <i>Set2</i>        | Ash   | <i>Drosophila miranda</i>    |
| XP_017141104.1 | <i>Set8</i>        | -     | <i>Drosophila miranda</i>    |
| XP_017152710.1 | <i>setd</i>        | SETD  | <i>Drosophila miranda</i>    |
| XP_017145755.1 | <i>Smyd4-1</i>     | SMYD  | <i>Drosophila miranda</i>    |
| XP_017137452.1 | <i>Smyd4-2</i>     | SMYD  | <i>Drosophila miranda</i>    |
| XP_017150457.1 | <i>Smyd4-3</i>     | SMYD  | <i>Drosophila miranda</i>    |
| XP_017147620.1 | <i>Smyd4-4</i>     | SMYD  | <i>Drosophila miranda</i>    |
| XP_017141239.1 | <i>Smyd5</i>       | SMYD  | <i>Drosophila miranda</i>    |
| XP_017146532.1 | <i>SmydA-1</i>     | SmydA | <i>Drosophila miranda</i>    |
| XP_017134743.1 | <i>SmydA-2</i>     | SmydA | <i>Drosophila miranda</i>    |
| XP_017156586.1 | <i>SmydA-4</i>     | SmydA | <i>Drosophila miranda</i>    |
| XP_017149995.1 | <i>SmydA-5</i>     | SmydA | <i>Drosophila miranda</i>    |
| XP_017147812.1 | <i>SmydA-6</i>     | SmydA | <i>Drosophila miranda</i>    |
| XP_017148482.1 | <i>SmydA-8</i>     | SmydA | <i>Drosophila miranda</i>    |
| XP_017148473.1 | <i>SmydA-8</i>     | SmydA | <i>Drosophila miranda</i>    |
| XP_017138378.1 | <i>SmydA-9</i>     | SmydA | <i>Drosophila miranda</i>    |
| XP_017140697.1 | <i>Su(var)3-9</i>  | Suv   | <i>Drosophila miranda</i>    |
| XP_017139499.1 | <i>suv</i>         | Suv   | <i>Drosophila miranda</i>    |
| XP_017145180.1 | <i>trr</i>         | Trx   | <i>Drosophila miranda</i>    |
| XP_017141807.1 | <i>trx</i>         | Trx   | <i>Drosophila miranda</i>    |
| XP_017135809.1 | <i>upSET(MLL5)</i> | -     | <i>Drosophila miranda</i>    |
| GI12469        | -                  | -     | <i>Drosophila mojavensis</i> |
| GI13513        | <i>ash1</i>        | Ash   | <i>Drosophila mojavensis</i> |
| GI19513        | <i>egg</i>         | Suv   | <i>Drosophila mojavensis</i> |
| GI13833        | <i>Ez</i>          | Ez    | <i>Drosophila mojavensis</i> |
| GI21426        | <i>G9a</i>         | Suv   | <i>Drosophila mojavensis</i> |
| GI16112        | <i>Hmt4-20</i>     | -     | <i>Drosophila mojavensis</i> |
| GI23270        | <i>Mes-4</i>       | Ash   | <i>Drosophila mojavensis</i> |
| GI12297        | <i>Set2</i>        | Ash   | <i>Drosophila mojavensis</i> |
| GI15146        | <i>Set2</i>        | Ash   | <i>Drosophila mojavensis</i> |
| GI22805        | <i>Set8</i>        | -     | <i>Drosophila mojavensis</i> |
| GI21676        | <i>setd</i>        | SETD  | <i>Drosophila mojavensis</i> |
| GI19663        | <i>Smyd4-1</i>     | SMYD  | <i>Drosophila mojavensis</i> |
| GI12333        | <i>Smyd4-2</i>     | SMYD  | <i>Drosophila mojavensis</i> |
| GI18563        | <i>Smyd4-3</i>     | SMYD  | <i>Drosophila mojavensis</i> |
| GI20970        | <i>Smyd4-4</i>     | SMYD  | <i>Drosophila mojavensis</i> |
| GI10143        | <i>Smyd5</i>       | SMYD  | <i>Drosophila mojavensis</i> |
| GI19093        | <i>SmydA-1</i>     | SmydA | <i>Drosophila mojavensis</i> |
| GI11814        | <i>SmydA-2</i>     | SmydA | <i>Drosophila mojavensis</i> |

|         |                    |       |                                 |
|---------|--------------------|-------|---------------------------------|
| GI23580 | <i>SmydA-3</i>     | SmydA | <i>Drosophila mojavensis</i>    |
| GI16059 | <i>SmydA-4</i>     | SmydA | <i>Drosophila mojavensis</i>    |
| GI21287 | <i>SmydA-5</i>     | SmydA | <i>Drosophila mojavensis</i>    |
| GI21216 | <i>SmydA-6</i>     | SmydA | <i>Drosophila mojavensis</i>    |
| GI21214 | <i>SmydA-7</i>     | SmydA | <i>Drosophila mojavensis</i>    |
| GI21459 | <i>SmydA-8</i>     | SmydA | <i>Drosophila mojavensis</i>    |
| GI21458 | <i>SmydA-8</i>     | SmydA | <i>Drosophila mojavensis</i>    |
| GI15088 | <i>SmydA-9</i>     | SmydA | <i>Drosophila mojavensis</i>    |
| GI24667 | <i>Su(var)3-9</i>  | Suv   | <i>Drosophila mojavensis</i>    |
| GI21761 | <i>trr</i>         | Trx   | <i>Drosophila mojavensis</i>    |
| GI24532 | <i>trr</i>         | Trx   | <i>Drosophila mojavensis</i>    |
| GI13679 | <i>upSET(MLL5)</i> | -     | <i>Drosophila mojavensis</i>    |
| GL20883 | <i>ash1</i>        | Ash   | <i>Drosophila persimilis</i>    |
| GL12308 | <i>Blimp-1</i>     | PRDM  | <i>Drosophila persimilis</i>    |
| GL17699 | <i>egg</i>         | Suv   | <i>Drosophila persimilis</i>    |
| GL17700 | <i>egg</i>         | Suv   | <i>Drosophila persimilis</i>    |
| GL15590 | <i>Ez</i>          | Ez    | <i>Drosophila persimilis</i>    |
| GL13363 | <i>G9a</i>         | Suv   | <i>Drosophila persimilis</i>    |
| GL13360 | <i>Hmt4-20</i>     | -     | <i>Drosophila persimilis</i>    |
| GL23881 | <i>Mes-4</i>       | Ash   | <i>Drosophila persimilis</i>    |
| GL12290 | <i>Set1</i>        | Trx   | <i>Drosophila persimilis</i>    |
| GL27000 | <i>Set2</i>        | Ash   | <i>Drosophila persimilis</i>    |
| GL25818 | <i>Set2</i>        | Ash   | <i>Drosophila persimilis</i>    |
| GL23503 | <i>Set8</i>        | -     | <i>Drosophila persimilis</i>    |
| GL13316 | <i>setd</i>        | SETD  | <i>Drosophila persimilis</i>    |
| GL20110 | <i>Smyd4-1</i>     | SMYD  | <i>Drosophila persimilis</i>    |
| GL24960 | <i>Smyd4-2</i>     | SMYD  | <i>Drosophila persimilis</i>    |
| GL11690 | <i>Smyd4-3</i>     | SMYD  | <i>Drosophila persimilis</i>    |
| GL16991 | <i>Smyd4-4</i>     | SMYD  | <i>Drosophila persimilis</i>    |
| GL12277 | <i>Smyd5</i>       | SMYD  | <i>Drosophila persimilis</i>    |
| GL10122 | <i>SmydA-1</i>     | SmydA | <i>Drosophila persimilis</i>    |
| GL21959 | <i>SmydA-2</i>     | SmydA | <i>Drosophila persimilis</i>    |
| GL19122 | <i>SmydA-3</i>     | SmydA | <i>Drosophila persimilis</i>    |
| GL18252 | <i>SmydA-4</i>     | SmydA | <i>Drosophila persimilis</i>    |
| GL11805 | <i>SmydA-5</i>     | SmydA | <i>Drosophila persimilis</i>    |
| GL17552 | <i>SmydA-6</i>     | SmydA | <i>Drosophila persimilis</i>    |
| GL13396 | <i>SmydA-8</i>     | SmydA | <i>Drosophila persimilis</i>    |
| GL26796 | <i>SmydA-9</i>     | SmydA | <i>Drosophila persimilis</i>    |
| GL12073 | <i>Su(var)3-9</i>  | Suv   | <i>Drosophila persimilis</i>    |
| GL21921 | <i>suv</i>         | Suv   | <i>Drosophila persimilis</i>    |
| GL18348 | <i>trr</i>         | Trx   | <i>Drosophila persimilis</i>    |
| GL23289 | <i>trx</i>         | Trx   | <i>Drosophila persimilis</i>    |
| GL17957 | <i>upSET(MLL5)</i> | -     | <i>Drosophila persimilis</i>    |
| GA21391 | <i>ash1</i>        | Ash   | <i>Drosophila pseudoobscura</i> |

|            |                    |       |                                 |
|------------|--------------------|-------|---------------------------------|
| GA23469    | <i>Blimp-1</i>     | PRDM  | <i>Drosophila pseudoobscura</i> |
| GA24879    | <i>egg</i>         | Suv   | <i>Drosophila pseudoobscura</i> |
| GA19644    | <i>Ez</i>          | Ez    | <i>Drosophila pseudoobscura</i> |
| GA15565    | <i>G9a</i>         | Suv   | <i>Drosophila pseudoobscura</i> |
| GA22871    | <i>Hmt4-20</i>     | -     | <i>Drosophila pseudoobscura</i> |
| GA18567    | <i>Mes-4</i>       | Ash   | <i>Drosophila pseudoobscura</i> |
| GA14357    | <i>Mes-4</i>       | Ash   | <i>Drosophila pseudoobscura</i> |
| GA26260    | <i>Set1</i>        | Trx   | <i>Drosophila pseudoobscura</i> |
| GA25456    | <i>Set2</i>        | Ash   | <i>Drosophila pseudoobscura</i> |
| GA17259    | <i>Set8</i>        | -     | <i>Drosophila pseudoobscura</i> |
| GA17108    | <i>setd</i>        | SETD  | <i>Drosophila pseudoobscura</i> |
| GA24934    | <i>Smyd4-1</i>     | SMYD  | <i>Drosophila pseudoobscura</i> |
| GA12774    | <i>Smyd4-2</i>     | SMYD  | <i>Drosophila pseudoobscura</i> |
| GA20567    | <i>Smyd4-3</i>     | SMYD  | <i>Drosophila pseudoobscura</i> |
| GA21031    | <i>Smyd4-4</i>     | SMYD  | <i>Drosophila pseudoobscura</i> |
| GA17400    | <i>Smyd5</i>       | SMYD  | <i>Drosophila pseudoobscura</i> |
| GA25085    | <i>SmydA-1</i>     | SmydA | <i>Drosophila pseudoobscura</i> |
| GA14810    | <i>SmydA-2</i>     | SmydA | <i>Drosophila pseudoobscura</i> |
| GA14319    | <i>SmydA-3</i>     | SmydA | <i>Drosophila pseudoobscura</i> |
| GA10806    | <i>SmydA-4</i>     | SmydA | <i>Drosophila pseudoobscura</i> |
| GA13100    | <i>SmydA-5</i>     | SmydA | <i>Drosophila pseudoobscura</i> |
| GA21935    | <i>SmydA-6</i>     | SmydA | <i>Drosophila pseudoobscura</i> |
| GA22855    | <i>SmydA-8</i>     | SmydA | <i>Drosophila pseudoobscura</i> |
| GA11413    | <i>SmydA-9</i>     | SmydA | <i>Drosophila pseudoobscura</i> |
| GA19622    | <i>Su(var)3-9</i>  | Suv   | <i>Drosophila pseudoobscura</i> |
| GA18262    | <i>suv</i>         | Suv   | <i>Drosophila pseudoobscura</i> |
| GA17728    | <i>trr</i>         | Trx   | <i>Drosophila pseudoobscura</i> |
| GA27210    | <i>trx</i>         | Trx   | <i>Drosophila pseudoobscura</i> |
| GA21472    | <i>upSET(MLL5)</i> | -     | <i>Drosophila pseudoobscura</i> |
| DRHO008775 | <i>ash1</i>        | Ash   | <i>Drosophila rhopaloea</i>     |
| DRHO004459 | <i>Blimp-1</i>     | PRDM  | <i>Drosophila rhopaloea</i>     |
| DRHO003622 | <i>egg</i>         | Suv   | <i>Drosophila rhopaloea</i>     |
| DRHO001312 | <i>Ez</i>          | Ez    | <i>Drosophila rhopaloea</i>     |
| DRHO000257 | <i>G9a</i>         | Suv   | <i>Drosophila rhopaloea</i>     |
| DRHO000247 | <i>Hmt4-20</i>     | -     | <i>Drosophila rhopaloea</i>     |
| DRHO001671 | <i>Mes-4</i>       | Ash   | <i>Drosophila rhopaloea</i>     |
| DRHO003718 | <i>Set2</i>        | Ash   | <i>Drosophila rhopaloea</i>     |
| DRHO013383 | <i>Set8</i>        | -     | <i>Drosophila rhopaloea</i>     |
| DRHO002745 | <i>setd</i>        | SETD  | <i>Drosophila rhopaloea</i>     |
| DRHO001540 | <i>Smyd4-1</i>     | SMYD  | <i>Drosophila rhopaloea</i>     |
| DRHO007167 | <i>Smyd4-2</i>     | SMYD  | <i>Drosophila rhopaloea</i>     |
| DRHO003666 | <i>Smyd4-3</i>     | SMYD  | <i>Drosophila rhopaloea</i>     |
| DRHO002503 | <i>Smyd4-4</i>     | SMYD  | <i>Drosophila rhopaloea</i>     |
| DRHO005712 | <i>Smyd5</i>       | SMYD  | <i>Drosophila rhopaloea</i>     |

|            |                    |       |                             |
|------------|--------------------|-------|-----------------------------|
| DRHO009589 | <i>SmydA-3</i>     | SmydA | <i>Drosophila rhopaloa</i>  |
| DRHO004823 | <i>SmydA-4</i>     | SmydA | <i>Drosophila rhopaloa</i>  |
| DRHO000187 | <i>SmydA-8</i>     | SmydA | <i>Drosophila rhopaloa</i>  |
| DRHO000188 | <i>SmydA-8</i>     | SmydA | <i>Drosophila rhopaloa</i>  |
| DRHO012492 | <i>SmydA-9</i>     | SmydA | <i>Drosophila rhopaloa</i>  |
| DRHO012570 | <i>Su(var)3-9</i>  | Suv   | <i>Drosophila rhopaloa</i>  |
| DRHO012691 | <i>Su(var)3-9</i>  | Suv   | <i>Drosophila rhopaloa</i>  |
| DRHO009481 | <i>suv</i>         | Suv   | <i>Drosophila rhopaloa</i>  |
| DRHO000294 | <i>trr</i>         | Trx   | <i>Drosophila rhopaloa</i>  |
| DRHO009111 | <i>trx</i>         | Trx   | <i>Drosophila rhopaloa</i>  |
| DRHO006710 | <i>upSET(MLL5)</i> | -     | <i>Drosophila rhopaloa</i>  |
| GM17444    | <i>ash1</i>        | Ash   | <i>Drosophila sechellia</i> |
| GM14713    | <i>Blimp-1</i>     | PRDM  | <i>Drosophila sechellia</i> |
| GM11794    | <i>egg</i>         | Suv   | <i>Drosophila sechellia</i> |
| GM24804    | <i>Ez</i>          | Ez    | <i>Drosophila sechellia</i> |
| GM19051    | <i>G9a</i>         | Suv   | <i>Drosophila sechellia</i> |
| GM19029    | <i>Hmt4-20</i>     | -     | <i>Drosophila sechellia</i> |
| GM13547    | <i>Mes-4</i>       | Ash   | <i>Drosophila sechellia</i> |
| GM18767    | <i>Set1</i>        | Trx   | <i>Drosophila sechellia</i> |
| GM11634    | <i>Set2</i>        | Ash   | <i>Drosophila sechellia</i> |
| GM24161    | <i>Set8</i>        | -     | <i>Drosophila sechellia</i> |
| GM17489    | <i>setd</i>        | SETD  | <i>Drosophila sechellia</i> |
| GM20595    | <i>Smyd4-1</i>     | SMYD  | <i>Drosophila sechellia</i> |
| GM24661    | <i>Smyd4-2</i>     | SMYD  | <i>Drosophila sechellia</i> |
| GM21288    | <i>Smyd4-3</i>     | SMYD  | <i>Drosophila sechellia</i> |
| GM21333    | <i>Smyd4-4</i>     | SMYD  | <i>Drosophila sechellia</i> |
| GM15092    | <i>Smyd5</i>       | SMYD  | <i>Drosophila sechellia</i> |
| GM21522    | <i>SmydA-1</i>     | SmydA | <i>Drosophila sechellia</i> |
| GM14901    | <i>SmydA-2</i>     | SmydA | <i>Drosophila sechellia</i> |
| GM18755    | <i>SmydA-3</i>     | SmydA | <i>Drosophila sechellia</i> |
| GM11450    | <i>SmydA-4</i>     | SmydA | <i>Drosophila sechellia</i> |
| GM16483    | <i>SmydA-5</i>     | SmydA | <i>Drosophila sechellia</i> |
| GM21751    | <i>SmydA-6</i>     | SmydA | <i>Drosophila sechellia</i> |
| GM18906    | <i>SmydA-8</i>     | SmydA | <i>Drosophila sechellia</i> |
| GM11659    | <i>SmydA-9</i>     | SmydA | <i>Drosophila sechellia</i> |
| GM25792    | <i>Su(var)3-9</i>  | Suv   | <i>Drosophila sechellia</i> |
| GM23905    | <i>suv</i>         | Suv   | <i>Drosophila sechellia</i> |
| GM18944    | <i>trr</i>         | Trx   | <i>Drosophila sechellia</i> |
| GM25445    | <i>upSET(MLL5)</i> | -     | <i>Drosophila sechellia</i> |
| GD12268    | <i>ash1</i>        | Ash   | <i>Drosophila simulans</i>  |
| GD12857    | <i>Ez</i>          | Ez    | <i>Drosophila simulans</i>  |
| GD16494    | <i>G9a</i>         | Suv   | <i>Drosophila simulans</i>  |
| GD16466    | <i>Hmt4-20</i>     | -     | <i>Drosophila simulans</i>  |
| GD18047    | <i>Mes-4</i>       | Ash   | <i>Drosophila simulans</i>  |

|                |                    |       |                            |
|----------------|--------------------|-------|----------------------------|
| GD11928        | <i>Set1</i>        | Trx   | <i>Drosophila simulans</i> |
| GD17127        | <i>Set2</i>        | Ash   | <i>Drosophila simulans</i> |
| GD18957        | <i>Set8</i>        | -     | <i>Drosophila simulans</i> |
| GD16174        | <i>setd</i>        | SETD  | <i>Drosophila simulans</i> |
| GD10068        | <i>Smyd4-1</i>     | SMYD  | <i>Drosophila simulans</i> |
| GD12724        | <i>Smyd4-2</i>     | SMYD  | <i>Drosophila simulans</i> |
| GD10796        | <i>Smyd4-3</i>     | SMYD  | <i>Drosophila simulans</i> |
| GD10841        | <i>Smyd4-4</i>     | SMYD  | <i>Drosophila simulans</i> |
| GD19999        | <i>Smyd5</i>       | SMYD  | <i>Drosophila simulans</i> |
| GD12310        | <i>SmydA-2</i>     | SmydA | <i>Drosophila simulans</i> |
| GD23739        | <i>SmydA-3</i>     | SmydA | <i>Drosophila simulans</i> |
| GD16997        | <i>SmydA-4</i>     | SmydA | <i>Drosophila simulans</i> |
| GD10336        | <i>SmydA-5</i>     | SmydA | <i>Drosophila simulans</i> |
| GD11242        | <i>SmydA-6</i>     | SmydA | <i>Drosophila simulans</i> |
| GD16076        | <i>SmydA-9</i>     | SmydA | <i>Drosophila simulans</i> |
| GD20368        | <i>Su(var)3-9</i>  | Suv   | <i>Drosophila simulans</i> |
| GD18718        | <i>suv</i>         | Suv   | <i>Drosophila simulans</i> |
| GD16408        | <i>trr</i>         | Trx   | <i>Drosophila simulans</i> |
| GD20433        | <i>trx</i>         | Trx   | <i>Drosophila simulans</i> |
| GD14471        | <i>upSET(MLL5)</i> | -     | <i>Drosophila simulans</i> |
| XP_016931063.1 | <i>ash1</i>        | Ash   | <i>Drosophila suzukii</i>  |
| XP_016932019.1 | <i>Blimp-1</i>     | PRDM  | <i>Drosophila suzukii</i>  |
| XP_016930363.1 | <i>egg</i>         | Suv   | <i>Drosophila suzukii</i>  |
| XP_016934515.1 | <i>Ez</i>          | Ez    | <i>Drosophila suzukii</i>  |
| XP_016939221.1 | <i>G9a</i>         | Suv   | <i>Drosophila suzukii</i>  |
| XP_016939119.1 | <i>Hmt4-20</i>     | -     | <i>Drosophila suzukii</i>  |
| XP_016940034.1 | <i>Mes-4</i>       | Ash   | <i>Drosophila suzukii</i>  |
| XP_016940252.1 | <i>Set1</i>        | Trx   | <i>Drosophila suzukii</i>  |
| XP_016939483.1 | <i>Set1</i>        | Trx   | <i>Drosophila suzukii</i>  |
| XP_016923155.1 | <i>Set2</i>        | Ash   | <i>Drosophila suzukii</i>  |
| XP_016940022.1 | <i>Set8</i>        | -     | <i>Drosophila suzukii</i>  |
| XP_016939300.1 | <i>setd</i>        | SETD  | <i>Drosophila suzukii</i>  |
| XP_016928575.1 | <i>Smyd4-1</i>     | SMYD  | <i>Drosophila suzukii</i>  |
| XP_016933469.1 | <i>Smyd4-2</i>     | SMYD  | <i>Drosophila suzukii</i>  |
| XP_016929914.1 | <i>Smyd4-3</i>     | SMYD  | <i>Drosophila suzukii</i>  |
| XP_016930447.1 | <i>Smyd4-4</i>     | SMYD  | <i>Drosophila suzukii</i>  |
| XP_016923380.1 | <i>Smyd5</i>       | SMYD  | <i>Drosophila suzukii</i>  |
| XP_016927879.1 | <i>SmydA-1</i>     | SmydA | <i>Drosophila suzukii</i>  |
| XP_016938466.1 | <i>SmydA-2</i>     | SmydA | <i>Drosophila suzukii</i>  |
| XP_016945453.1 | <i>SmydA-3</i>     | SmydA | <i>Drosophila suzukii</i>  |
| XP_016931479.1 | <i>SmydA-5</i>     | SmydA | <i>Drosophila suzukii</i>  |
| XP_016928680.1 | <i>SmydA-6</i>     | SmydA | <i>Drosophila suzukii</i>  |
| XP_016938707.1 | <i>SmydA-8</i>     | SmydA | <i>Drosophila suzukii</i>  |
| XP_016938911.1 | <i>SmydA-8</i>     | SmydA | <i>Drosophila suzukii</i>  |

|                |                    |       |                              |
|----------------|--------------------|-------|------------------------------|
| XP_016936678.1 | <i>SmydA-9</i>     | SmydA | <i>Drosophila suzukii</i>    |
| XP_016923509.1 | <i>Su(var)3-9</i>  | Suv   | <i>Drosophila suzukii</i>    |
| XP_016941346.1 | <i>suv</i>         | Suv   | <i>Drosophila suzukii</i>    |
| XP_016939208.1 | <i>trr</i>         | Trx   | <i>Drosophila suzukii</i>    |
| XP_016938534.1 | <i>trx</i>         | Trx   | <i>Drosophila suzukii</i>    |
| DTAK011320     | <i>ash1</i>        | Ash   | <i>Drosophila takahashii</i> |
| DTAK002609     | <i>Blimp-1</i>     | PRDM  | <i>Drosophila takahashii</i> |
| DTAK004246     | <i>egg</i>         | Suv   | <i>Drosophila takahashii</i> |
| DTAK008728     | <i>Ez</i>          | Ez    | <i>Drosophila takahashii</i> |
| DTAK007517     | <i>G9a</i>         | Suv   | <i>Drosophila takahashii</i> |
| DTAK006501     | <i>Hmt4-20</i>     | -     | <i>Drosophila takahashii</i> |
| DTAK001799     | <i>Mes-4</i>       | Ash   | <i>Drosophila takahashii</i> |
| DTAK012585     | <i>Set1</i>        | Trx   | <i>Drosophila takahashii</i> |
| DTAK009746     | <i>Set2</i>        | Ash   | <i>Drosophila takahashii</i> |
| DTAK005184     | <i>Set8</i>        | -     | <i>Drosophila takahashii</i> |
| DTAK004856     | <i>setd</i>        | SETD  | <i>Drosophila takahashii</i> |
| DTAK001101     | <i>Smyd4-1</i>     | SMYD  | <i>Drosophila takahashii</i> |
| DTAK009537     | <i>Smyd4-3</i>     | SMYD  | <i>Drosophila takahashii</i> |
| DTAK009631     | <i>Smyd4-4</i>     | SMYD  | <i>Drosophila takahashii</i> |
| DTAK003239     | <i>Smyd5</i>       | SMYD  | <i>Drosophila takahashii</i> |
| DTAK009409     | <i>SmydA-2</i>     | SmydA | <i>Drosophila takahashii</i> |
| DTAK008828     | <i>SmydA-3</i>     | SmydA | <i>Drosophila takahashii</i> |
| DTAK000988     | <i>SmydA-4</i>     | SmydA | <i>Drosophila takahashii</i> |
| DTAK010973     | <i>SmydA-9</i>     | SmydA | <i>Drosophila takahashii</i> |
| DTAK001868     | <i>Su(var)3-9</i>  | Suv   | <i>Drosophila takahashii</i> |
| DTAK003541     | <i>suv</i>         | Suv   | <i>Drosophila takahashii</i> |
| DTAK000910     | <i>trr</i>         | Trx   | <i>Drosophila takahashii</i> |
| DTAK000774     | <i>trx</i>         | Trx   | <i>Drosophila takahashii</i> |
| DTAK004471     | <i>upSET(MLL5)</i> | -     | <i>Drosophila takahashii</i> |
| GJ14055        | -                  | -     | <i>Drosophila virilis</i>    |
| GJ11874        | <i>ash1</i>        | Ash   | <i>Drosophila virilis</i>    |
| GJ13412        | <i>Blimp-1</i>     | PRDM  | <i>Drosophila virilis</i>    |
| GJ21082        | <i>egg</i>         | Suv   | <i>Drosophila virilis</i>    |
| GJ11699        | <i>Ez</i>          | Ez    | <i>Drosophila virilis</i>    |
| GJ16443        | <i>G9a</i>         | Suv   | <i>Drosophila virilis</i>    |
| GJ15764        | <i>Hmt4-20</i>     | -     | <i>Drosophila virilis</i>    |
| GJ10771        | <i>Mes-4</i>       | Ash   | <i>Drosophila virilis</i>    |
| GJ23622        | <i>Set1</i>        | Trx   | <i>Drosophila virilis</i>    |
| GJ13235        | <i>Set2</i>        | Ash   | <i>Drosophila virilis</i>    |
| GJ19006        | <i>Set2</i>        | Ash   | <i>Drosophila virilis</i>    |
| GJ22807        | <i>Set8</i>        | -     | <i>Drosophila virilis</i>    |
| GJ16703        | <i>setd</i>        | SETD  | <i>Drosophila virilis</i>    |
| GJ15028        | <i>Smyd4-1</i>     | SMYD  | <i>Drosophila virilis</i>    |
| GJ12224        | <i>Smyd4-2</i>     | SMYD  | <i>Drosophila virilis</i>    |



|         |                    |       |                              |
|---------|--------------------|-------|------------------------------|
| GJ20356 | <i>Smyd4-3</i>     | SMYD  | <i>Drosophila virilis</i>    |
| GJ20689 | <i>Smyd4-4</i>     | SMYD  | <i>Drosophila virilis</i>    |
| GJ23360 | <i>Smyd5</i>       | SMYD  | <i>Drosophila virilis</i>    |
| GJ20068 | <i>SmydA-1</i>     | SmydA | <i>Drosophila virilis</i>    |
| GJ13517 | <i>SmydA-2</i>     | SmydA | <i>Drosophila virilis</i>    |
| GJ20777 | <i>SmydA-3</i>     | SmydA | <i>Drosophila virilis</i>    |
| GJ15632 | <i>SmydA-4</i>     | SmydA | <i>Drosophila virilis</i>    |
| GJ20889 | <i>SmydA-5</i>     | SmydA | <i>Drosophila virilis</i>    |
| GJ20818 | <i>SmydA-6</i>     | SmydA | <i>Drosophila virilis</i>    |
| GJ16480 | <i>SmydA-8</i>     | SmydA | <i>Drosophila virilis</i>    |
| GJ18896 | <i>SmydA-9</i>     | SmydA | <i>Drosophila virilis</i>    |
| GJ24041 | <i>Su(var)3-9</i>  | Suv   | <i>Drosophila virilis</i>    |
| GJ10588 | <i>suv</i>         | Suv   | <i>Drosophila virilis</i>    |
| GJ19853 | <i>trr</i>         | Trx   | <i>Drosophila virilis</i>    |
| GJ19139 | <i>trr</i>         | Trx   | <i>Drosophila virilis</i>    |
| trx     | <i>trx</i>         | Trx   | <i>Drosophila virilis</i>    |
| GJ14017 | <i>upSET(MLL5)</i> | -     | <i>Drosophila virilis</i>    |
| GK20252 | <i>ash1</i>        | Ash   | <i>Drosophila willistoni</i> |
| GK17303 | <i>Blimp-1</i>     | PRDM  | <i>Drosophila willistoni</i> |
| GK21652 | <i>egg</i>         | Suv   | <i>Drosophila willistoni</i> |
| GK12358 | <i>Ez</i>          | Ez    | <i>Drosophila willistoni</i> |
| GK24998 | <i>G9a</i>         | Suv   | <i>Drosophila willistoni</i> |
| GK16179 | <i>Hmt4-20</i>     | -     | <i>Drosophila willistoni</i> |
| GK14418 | <i>Mes-4</i>       | Ash   | <i>Drosophila willistoni</i> |
| GK12911 | <i>Set1</i>        | Trx   | <i>Drosophila willistoni</i> |
| GK11134 | <i>Set1</i>        | Trx   | <i>Drosophila willistoni</i> |
| GK25076 | <i>Set2</i>        | Ash   | <i>Drosophila willistoni</i> |
| GK10941 | <i>Set8</i>        | -     | <i>Drosophila willistoni</i> |
| GK16171 | <i>setd</i>        | SETD  | <i>Drosophila willistoni</i> |
| GK21490 | <i>Smyd4-1</i>     | SMYD  | <i>Drosophila willistoni</i> |
| GK20590 | <i>Smyd4-2</i>     | SMYD  | <i>Drosophila willistoni</i> |
| GK19653 | <i>Smyd4-4</i>     | SMYD  | <i>Drosophila willistoni</i> |
| GK12748 | <i>Smyd5</i>       | SMYD  | <i>Drosophila willistoni</i> |
| GK20779 | <i>SmydA-1</i>     | SmydA | <i>Drosophila willistoni</i> |
| GK12548 | <i>SmydA-2</i>     | SmydA | <i>Drosophila willistoni</i> |
| GK19981 | <i>SmydA-4</i>     | SmydA | <i>Drosophila willistoni</i> |
| GK21998 | <i>SmydA-5</i>     | SmydA | <i>Drosophila willistoni</i> |
| GK17864 | <i>SmydA-6</i>     | SmydA | <i>Drosophila willistoni</i> |
| GK21977 | <i>SmydA-7</i>     | SmydA | <i>Drosophila willistoni</i> |
| GK23578 | <i>SmydA-8</i>     | SmydA | <i>Drosophila willistoni</i> |
| GK25543 | <i>SmydA-9</i>     | SmydA | <i>Drosophila willistoni</i> |
| GK12089 | <i>Su(var)3-9</i>  | Suv   | <i>Drosophila willistoni</i> |
| GK25046 | <i>Su(var)3-9</i>  | Suv   | <i>Drosophila willistoni</i> |
| GK13904 | <i>suv</i>         | Suv   | <i>Drosophila willistoni</i> |

|           |                    |       |                              |
|-----------|--------------------|-------|------------------------------|
| GK16377   | <i>trr</i>         | Trx   | <i>Drosophila willistoni</i> |
| GK10891   | <i>trx</i>         | Trx   | <i>Drosophila willistoni</i> |
| GK16792   | <i>upSET(MLL5)</i> | -     | <i>Drosophila willistoni</i> |
| GE22484   | <i>ash1</i>        | Ash   | <i>Drosophila yakuba</i>     |
| GE21501   | <i>Blimp-1</i>     | PRDM  | <i>Drosophila yakuba</i>     |
| GE11418   | <i>egg</i>         | Suv   | <i>Drosophila yakuba</i>     |
| GE20265   | <i>Ez</i>          | Ez    | <i>Drosophila yakuba</i>     |
| GE16600   | <i>G9a</i>         | Suv   | <i>Drosophila yakuba</i>     |
| GE16574   | <i>Hmt4-20</i>     | -     | <i>Drosophila yakuba</i>     |
| GE10528   | <i>Mes-4</i>       | Ash   | <i>Drosophila yakuba</i>     |
| GE25383   | <i>Set1</i>        | Trx   | <i>Drosophila yakuba</i>     |
| GE17076   | <i>Set2</i>        | Ash   | <i>Drosophila yakuba</i>     |
| GE24231   | <i>Set8</i>        | -     | <i>Drosophila yakuba</i>     |
| GE17555   | <i>setd</i>        | SETD  | <i>Drosophila yakuba</i>     |
| GE22225   | <i>Smyd4-1</i>     | SMYD  | <i>Drosophila yakuba</i>     |
| GE20125   | <i>Smyd4-2</i>     | SMYD  | <i>Drosophila yakuba</i>     |
| GE12361   | <i>Smyd4-3</i>     | SMYD  | <i>Drosophila yakuba</i>     |
| GE12406   | <i>Smyd4-4</i>     | SMYD  | <i>Drosophila yakuba</i>     |
| GE25007   | <i>Smyd5</i>       | SMYD  | <i>Drosophila yakuba</i>     |
| GE13567   | <i>SmydA-1</i>     | SmydA | <i>Drosophila yakuba</i>     |
| GE22530   | <i>SmydA-2</i>     | SmydA | <i>Drosophila yakuba</i>     |
| GE18493   | <i>SmydA-3</i>     | SmydA | <i>Drosophila yakuba</i>     |
| GE15901   | <i>SmydA-4</i>     | SmydA | <i>Drosophila yakuba</i>     |
| GE19428   | <i>SmydA-5</i>     | SmydA | <i>Drosophila yakuba</i>     |
| GE11640   | <i>SmydA-6</i>     | SmydA | <i>Drosophila yakuba</i>     |
| GE16967   | <i>SmydA-8</i>     | SmydA | <i>Drosophila yakuba</i>     |
| GE15465   | <i>SmydA-9</i>     | SmydA | <i>Drosophila yakuba</i>     |
| GE26397   | <i>Su(var)3-9</i>  | Suv   | <i>Drosophila yakuba</i>     |
| GE26056   | <i>suv</i>         | Suv   | <i>Drosophila yakuba</i>     |
| GE16999   | <i>trr</i>         | Trx   | <i>Drosophila yakuba</i>     |
| GE26460   | <i>trx</i>         | Trx   | <i>Drosophila yakuba</i>     |
| GE21994   | <i>upSET(MLL5)</i> | -     | <i>Drosophila yakuba</i>     |
| Dnov03720 | <i>ash1</i>        | Ash   | <i>Dufourea novaeangliae</i> |
| Dnov07772 | <i>Blimp-1</i>     | PRDM  | <i>Dufourea novaeangliae</i> |
| Dnov01361 | <i>egg</i>         | Suv   | <i>Dufourea novaeangliae</i> |
| Dnov12361 | <i>Ez</i>          | Ez    | <i>Dufourea novaeangliae</i> |
| Dnov03119 | <i>G9a</i>         | Suv   | <i>Dufourea novaeangliae</i> |
| Dnov12237 | <i>Hmt4-20</i>     | -     | <i>Dufourea novaeangliae</i> |
| Dnov12368 | <i>Mes-4</i>       | Ash   | <i>Dufourea novaeangliae</i> |
| Dnov10243 | <i>Set1</i>        | Trx   | <i>Dufourea novaeangliae</i> |
| Dnov07842 | <i>Set2</i>        | Ash   | <i>Dufourea novaeangliae</i> |
| Dnov04181 | <i>Set8</i>        | -     | <i>Dufourea novaeangliae</i> |
| Dnov08929 | <i>setd</i>        | SETD  | <i>Dufourea novaeangliae</i> |
| Dnov08926 | <i>setd</i>        | SETD  | <i>Dufourea novaeangliae</i> |

|            |                    |       |                              |
|------------|--------------------|-------|------------------------------|
| Dnov11007  | <i>Smyd4-2</i>     | SMYD  | <i>Dufourea novaeangliae</i> |
| Dnov01731  | <i>Smyd4-2</i>     | SMYD  | <i>Dufourea novaeangliae</i> |
| Dnov00419  | <i>Smyd4-3</i>     | SMYD  | <i>Dufourea novaeangliae</i> |
| Dnov09445  | <i>Smyd4-3</i>     | SMYD  | <i>Dufourea novaeangliae</i> |
| Dnov10364  | <i>Smyd4-3</i>     | SMYD  | <i>Dufourea novaeangliae</i> |
| Dnov04775  | <i>Smyd4-4</i>     | SMYD  | <i>Dufourea novaeangliae</i> |
| Dnov01975  | <i>Smyd5</i>       | SMYD  | <i>Dufourea novaeangliae</i> |
| Dnov11385  | <i>SmydA-1</i>     | SmydA | <i>Dufourea novaeangliae</i> |
| Dnov05910  | <i>SmydA-3</i>     | SmydA | <i>Dufourea novaeangliae</i> |
| Dnov02443  | <i>SmydA-5</i>     | SmydA | <i>Dufourea novaeangliae</i> |
| Dnov05916  | <i>SmydA-8</i>     | SmydA | <i>Dufourea novaeangliae</i> |
| Dnov12047  | <i>Su(var)3-9</i>  | Suv   | <i>Dufourea novaeangliae</i> |
| Dnov03047  | <i>suv</i>         | Suv   | <i>Dufourea novaeangliae</i> |
| Dnov12588  | <i>trr</i>         | Trx   | <i>Dufourea novaeangliae</i> |
| Dnov10256  | <i>trx</i>         | Trx   | <i>Dufourea novaeangliae</i> |
| Dnov11710  | <i>upSET(MLL5)</i> | -     | <i>Dufourea novaeangliae</i> |
| EDAN016298 | -                  | -     | <i>Ephemera danica</i>       |
| EDAN016560 | -                  | -     | <i>Ephemera danica</i>       |
| EDAN017729 | <i>Blimp-1</i>     | PRDM  | <i>Ephemera danica</i>       |
| EDAN002594 | <i>Ez</i>          | Ez    | <i>Ephemera danica</i>       |
| EDAN015366 | <i>G9a</i>         | Suv   | <i>Ephemera danica</i>       |
| EDAN002811 | <i>Hmt4-20</i>     | -     | <i>Ephemera danica</i>       |
| EDAN010512 | <i>Mes-4</i>       | Ash   | <i>Ephemera danica</i>       |
| EDAN000752 | <i>Set1</i>        | Trx   | <i>Ephemera danica</i>       |
| EDAN006371 | <i>Set2</i>        | Ash   | <i>Ephemera danica</i>       |
| EDAN007195 | <i>Set8</i>        | -     | <i>Ephemera danica</i>       |
| EDAN019105 | <i>Set8</i>        | -     | <i>Ephemera danica</i>       |
| EDAN010686 | <i>setd</i>        | SETD  | <i>Ephemera danica</i>       |
| EDAN010505 | <i>Smyd4-2</i>     | SMYD  | <i>Ephemera danica</i>       |
| EDAN000998 | <i>Smyd4-2</i>     | SMYD  | <i>Ephemera danica</i>       |
| EDAN015875 | <i>Smyd4-2</i>     | SMYD  | <i>Ephemera danica</i>       |
| EDAN012149 | <i>Smyd4-3</i>     | SMYD  | <i>Ephemera danica</i>       |
| EDAN007659 | <i>Smyd4-3</i>     | SMYD  | <i>Ephemera danica</i>       |
| EDAN007660 | <i>Smyd4-3</i>     | SMYD  | <i>Ephemera danica</i>       |
| EDAN008466 | <i>Smyd4-3</i>     | SMYD  | <i>Ephemera danica</i>       |
| EDAN008467 | <i>Smyd4-3</i>     | SMYD  | <i>Ephemera danica</i>       |
| EDAN011068 | <i>Smyd4-3</i>     | SMYD  | <i>Ephemera danica</i>       |
| EDAN012148 | <i>Smyd4-3</i>     | SMYD  | <i>Ephemera danica</i>       |
| EDAN013890 | <i>Smyd4-3</i>     | SMYD  | <i>Ephemera danica</i>       |
| EDAN015693 | <i>Smyd4-3</i>     | SMYD  | <i>Ephemera danica</i>       |
| EDAN003791 | <i>Smyd4-4</i>     | SMYD  | <i>Ephemera danica</i>       |
| EDAN007661 | <i>Smyd4-4</i>     | SMYD  | <i>Ephemera danica</i>       |
| EDAN010840 | <i>Smyd4-4</i>     | SMYD  | <i>Ephemera danica</i>       |
| EDAN013130 | <i>Smyd4-4</i>     | SMYD  | <i>Ephemera danica</i>       |

|            |                    |       |                           |
|------------|--------------------|-------|---------------------------|
| EDAN016991 | <i>Smyd4-4</i>     | SMYD  | <i>Ephemera danica</i>    |
| EDAN004206 | <i>Smyd5</i>       | SMYD  | <i>Ephemera danica</i>    |
| EDAN006746 | <i>SmydA-1</i>     | SmydA | <i>Ephemera danica</i>    |
| EDAN007589 | <i>SmydA-2</i>     | SmydA | <i>Ephemera danica</i>    |
| EDAN015154 | <i>SmydA-2</i>     | SmydA | <i>Ephemera danica</i>    |
| EDAN006745 | <i>SmydA-4</i>     | SmydA | <i>Ephemera danica</i>    |
| EDAN004899 | <i>SmydA-4</i>     | SmydA | <i>Ephemera danica</i>    |
| EDAN008547 | <i>SmydA-5</i>     | SmydA | <i>Ephemera danica</i>    |
| EDAN006919 | <i>trx</i>         | Trx   | <i>Ephemera danica</i>    |
| EDAN009703 | <i>upSET(MLL5)</i> | -     | <i>Ephemera danica</i>    |
| Emex05073  | <i>ash1</i>        | Ash   | <i>Eufriesea mexicana</i> |
| Emex04823  | <i>Blimp-1</i>     | PRDM  | <i>Eufriesea mexicana</i> |
| Emex06112  | <i>egg</i>         | Suv   | <i>Eufriesea mexicana</i> |
| Emex01995  | <i>Ez</i>          | Ez    | <i>Eufriesea mexicana</i> |
| Emex06893  | <i>G9a</i>         | Suv   | <i>Eufriesea mexicana</i> |
| Emex01515  | <i>Hmt4-20</i>     | -     | <i>Eufriesea mexicana</i> |
| Emex01990  | <i>Mes-4</i>       | Ash   | <i>Eufriesea mexicana</i> |
| Emex12982  | <i>Set1</i>        | Trx   | <i>Eufriesea mexicana</i> |
| Emex04264  | <i>Set2</i>        | Ash   | <i>Eufriesea mexicana</i> |
| Emex10641  | <i>Set8</i>        | -     | <i>Eufriesea mexicana</i> |
| Emex03503  | <i>setd</i>        | SETD  | <i>Eufriesea mexicana</i> |
| Emex03505  | <i>setd</i>        | SETD  | <i>Eufriesea mexicana</i> |
| Emex09003  | <i>Smyd4-2</i>     | SMYD  | <i>Eufriesea mexicana</i> |
| Emex07171  | <i>Smyd4-3</i>     | SMYD  | <i>Eufriesea mexicana</i> |
| Emex01964  | <i>Smyd4-3</i>     | SMYD  | <i>Eufriesea mexicana</i> |
| Emex02218  | <i>Smyd4-3</i>     | SMYD  | <i>Eufriesea mexicana</i> |
| Emex04615  | <i>Smyd4-4</i>     | SMYD  | <i>Eufriesea mexicana</i> |
| Emex11447  | <i>Smyd5</i>       | SMYD  | <i>Eufriesea mexicana</i> |
| Emex11626  | <i>SmydA-1</i>     | SmydA | <i>Eufriesea mexicana</i> |
| Emex12315  | <i>SmydA-3</i>     | SmydA | <i>Eufriesea mexicana</i> |
| Emex12316  | <i>SmydA-4</i>     | SmydA | <i>Eufriesea mexicana</i> |
| Emex03889  | <i>SmydA-5</i>     | SmydA | <i>Eufriesea mexicana</i> |
| Emex07597  | <i>SmydA-8</i>     | SmydA | <i>Eufriesea mexicana</i> |
| Emex07120  | <i>Su(var)3-9</i>  | Suv   | <i>Eufriesea mexicana</i> |
| Emex06408  | <i>suv</i>         | Suv   | <i>Eufriesea mexicana</i> |
| Emex12886  | <i>trr</i>         | Trx   | <i>Eufriesea mexicana</i> |
| Emex06429  | <i>trx</i>         | Trx   | <i>Eufriesea mexicana</i> |
| Emex10451  | <i>upSET(MLL5)</i> | -     | <i>Eufriesea mexicana</i> |
| EAFF003172 | -                  | -     | <i>Eurytemora affinis</i> |
| EAFF012068 | -                  | -     | <i>Eurytemora affinis</i> |
| EAFF020546 | -                  | -     | <i>Eurytemora affinis</i> |
| EAFF024985 | -                  | -     | <i>Eurytemora affinis</i> |
| EAFF026995 | -                  | -     | <i>Eurytemora affinis</i> |
| EAFF001510 | -                  | -     | <i>Eurytemora affinis</i> |

|            |                |       |                           |
|------------|----------------|-------|---------------------------|
| EAFF004620 | -              | -     | <i>Eurytemora affinis</i> |
| EAFF014203 | -              | -     | <i>Eurytemora affinis</i> |
| EAFF022901 | -              | -     | <i>Eurytemora affinis</i> |
| EAFF023714 | -              | -     | <i>Eurytemora affinis</i> |
| EAFF024293 | -              | -     | <i>Eurytemora affinis</i> |
| EAFF028510 | -              | -     | <i>Eurytemora affinis</i> |
| EAFF026430 | <i>ash1</i>    | Ash   | <i>Eurytemora affinis</i> |
| EAFF004919 | <i>egg</i>     | Suv   | <i>Eurytemora affinis</i> |
| EAFF026919 | <i>Ez</i>      | Ez    | <i>Eurytemora affinis</i> |
| EAFF023801 | <i>Ez</i>      | Ez    | <i>Eurytemora affinis</i> |
| EAFF019469 | <i>G9a</i>     | Suv   | <i>Eurytemora affinis</i> |
| EAFF005171 | <i>Hmt4-20</i> | -     | <i>Eurytemora affinis</i> |
| EAFF015538 | <i>Mes-4</i>   | Ash   | <i>Eurytemora affinis</i> |
| EAFF001212 | <i>Set1</i>    | Trx   | <i>Eurytemora affinis</i> |
| EAFF023546 | <i>Set2</i>    | Ash   | <i>Eurytemora affinis</i> |
| EAFF001410 | <i>Set8</i>    | -     | <i>Eurytemora affinis</i> |
| EAFF023406 | <i>Set8</i>    | -     | <i>Eurytemora affinis</i> |
| EAFF006688 | <i>setd</i>    | SETD  | <i>Eurytemora affinis</i> |
| EAFF026654 | <i>Smyd3</i>   | SMYD  | <i>Eurytemora affinis</i> |
| EAFF010233 | <i>Smyd4-2</i> | SMYD  | <i>Eurytemora affinis</i> |
| EAFF016439 | <i>Smyd4-3</i> | SMYD  | <i>Eurytemora affinis</i> |
| EAFF004118 | <i>Smyd4-3</i> | SMYD  | <i>Eurytemora affinis</i> |
| EAFF006548 | <i>Smyd4-3</i> | SMYD  | <i>Eurytemora affinis</i> |
| EAFF009472 | <i>Smyd4-3</i> | SMYD  | <i>Eurytemora affinis</i> |
| EAFF011278 | <i>Smyd4-3</i> | SMYD  | <i>Eurytemora affinis</i> |
| EAFF011550 | <i>Smyd4-3</i> | SMYD  | <i>Eurytemora affinis</i> |
| EAFF011786 | <i>Smyd4-3</i> | SMYD  | <i>Eurytemora affinis</i> |
| EAFF012755 | <i>Smyd4-3</i> | SMYD  | <i>Eurytemora affinis</i> |
| EAFF017677 | <i>Smyd4-3</i> | SMYD  | <i>Eurytemora affinis</i> |
| EAFF018167 | <i>Smyd4-3</i> | SMYD  | <i>Eurytemora affinis</i> |
| EAFF019388 | <i>Smyd4-3</i> | SMYD  | <i>Eurytemora affinis</i> |
| EAFF021221 | <i>Smyd4-3</i> | SMYD  | <i>Eurytemora affinis</i> |
| EAFF022204 | <i>Smyd4-3</i> | SMYD  | <i>Eurytemora affinis</i> |
| EAFF023364 | <i>Smyd4-3</i> | SMYD  | <i>Eurytemora affinis</i> |
| EAFF025830 | <i>Smyd4-3</i> | SMYD  | <i>Eurytemora affinis</i> |
| EAFF026138 | <i>Smyd4-3</i> | SMYD  | <i>Eurytemora affinis</i> |
| EAFF018754 | <i>Smyd5</i>   | SMYD  | <i>Eurytemora affinis</i> |
| EAFF001987 | <i>SmydA-1</i> | SmydA | <i>Eurytemora affinis</i> |
| EAFF009709 | <i>SmydA-1</i> | SmydA | <i>Eurytemora affinis</i> |
| EAFF027622 | <i>SmydA-1</i> | SmydA | <i>Eurytemora affinis</i> |
| EAFF010234 | <i>SmydA-2</i> | SmydA | <i>Eurytemora affinis</i> |
| EAFF013875 | <i>SmydA-2</i> | SmydA | <i>Eurytemora affinis</i> |
| EAFF018214 | <i>SmydA-2</i> | SmydA | <i>Eurytemora affinis</i> |
| EAFF024128 | <i>SmydA-3</i> | SmydA | <i>Eurytemora affinis</i> |

|                |                    |       |                                   |
|----------------|--------------------|-------|-----------------------------------|
| EAFF025544     | <i>SmydA-3</i>     | SmydA | <i>Eurytemora affinis</i>         |
| EAFF016441     | <i>SmydA-4</i>     | SmydA | <i>Eurytemora affinis</i>         |
| EAFF014843     | <i>SmydA-4</i>     | SmydA | <i>Eurytemora affinis</i>         |
| EAFF025365     | <i>SmydA-4</i>     | SmydA | <i>Eurytemora affinis</i>         |
| EAFF026939     | <i>SmydA-4</i>     | SmydA | <i>Eurytemora affinis</i>         |
| EAFF009720     | <i>SmydA-8</i>     | SmydA | <i>Eurytemora affinis</i>         |
| EAFF018143     | <i>SmydA-9</i>     | SmydA | <i>Eurytemora affinis</i>         |
| EAFF024909     | <i>SmydA-9</i>     | SmydA | <i>Eurytemora affinis</i>         |
| EAFF023098     | <i>Su(var)3-9</i>  | Suv   | <i>Eurytemora affinis</i>         |
| EAFF017106     | <i>trr</i>         | Trx   | <i>Eurytemora affinis</i>         |
| EAFF025797     | <i>trr</i>         | Trx   | <i>Eurytemora affinis</i>         |
| EAFF024134     | <i>trx</i>         | Trx   | <i>Eurytemora affinis</i>         |
| XP_011299370.1 | -                  | -     | <i>Fopius arisanus</i>            |
| XP_011314430.1 | <i>ash1</i>        | Ash   | <i>Fopius arisanus</i>            |
| XP_011300368.1 | <i>Blimp-1</i>     | PRDM  | <i>Fopius arisanus</i>            |
| XP_011305877.1 | <i>egg</i>         | Suv   | <i>Fopius arisanus</i>            |
| XP_011301065.1 | <i>Ez</i>          | Ez    | <i>Fopius arisanus</i>            |
| XP_011300240.1 | <i>G9a</i>         | Suv   | <i>Fopius arisanus</i>            |
| XP_011297760.1 | <i>Hmt4-20</i>     | -     | <i>Fopius arisanus</i>            |
| XP_011300581.1 | <i>Mes-4</i>       | Ash   | <i>Fopius arisanus</i>            |
| XP_011304506.1 | <i>Set2</i>        | Ash   | <i>Fopius arisanus</i>            |
| XP_011297550.1 | <i>Set8</i>        | -     | <i>Fopius arisanus</i>            |
| XP_011312838.1 | <i>setd</i>        | SETD  | <i>Fopius arisanus</i>            |
| XP_011312104.1 | <i>Smyd4-1</i>     | SMYD  | <i>Fopius arisanus</i>            |
| XP_011307080.1 | <i>Smyd4-2</i>     | SMYD  | <i>Fopius arisanus</i>            |
| XP_011300905.1 | <i>Smyd4-2</i>     | SMYD  | <i>Fopius arisanus</i>            |
| XP_011314323.1 | <i>Smyd4-3</i>     | SMYD  | <i>Fopius arisanus</i>            |
| XP_011304562.1 | <i>Smyd4-3</i>     | SMYD  | <i>Fopius arisanus</i>            |
| XP_011311122.1 | <i>Smyd4-3</i>     | SMYD  | <i>Fopius arisanus</i>            |
| XP_011297539.1 | <i>Smyd4-4</i>     | SMYD  | <i>Fopius arisanus</i>            |
| XP_011304229.1 | <i>Smyd4-4</i>     | SMYD  | <i>Fopius arisanus</i>            |
| XP_011304682.1 | <i>Smyd5</i>       | SMYD  | <i>Fopius arisanus</i>            |
| XP_011312778.1 | <i>SmydA-1</i>     | SmydA | <i>Fopius arisanus</i>            |
| XP_011302347.1 | <i>SmydA-3</i>     | SmydA | <i>Fopius arisanus</i>            |
| XP_011307379.1 | <i>SmydA-5</i>     | SmydA | <i>Fopius arisanus</i>            |
| XP_011302346.1 | <i>SmydA-6</i>     | SmydA | <i>Fopius arisanus</i>            |
| XP_011306058.1 | <i>SmydA-8</i>     | SmydA | <i>Fopius arisanus</i>            |
| XP_011309925.1 | <i>Su(var)3-9</i>  | Suv   | <i>Fopius arisanus</i>            |
| XP_011306771.1 | <i>suv</i>         | Suv   | <i>Fopius arisanus</i>            |
| XP_011298309.1 | <i>trx</i>         | Trx   | <i>Fopius arisanus</i>            |
| XP_011297554.1 | <i>upSET(MLL5)</i> | -     | <i>Fopius arisanus</i>            |
| FOCC003770     | -                  | -     | <i>Frankliniella occidentalis</i> |
| FOCC010071     | -                  | -     | <i>Frankliniella occidentalis</i> |
| FOCC010072     | -                  | -     | <i>Frankliniella occidentalis</i> |

|            |                   |       |                                   |
|------------|-------------------|-------|-----------------------------------|
| FOCC010076 | -                 | -     | <i>Frankliniella occidentalis</i> |
| FOCC010077 | -                 | -     | <i>Frankliniella occidentalis</i> |
| FOCC010073 | -                 | -     | <i>Frankliniella occidentalis</i> |
| FOCC013086 | -                 | -     | <i>Frankliniella occidentalis</i> |
| FOCC012844 | -                 | -     | <i>Frankliniella occidentalis</i> |
| FOCC007955 | <i>ash1</i>       | Ash   | <i>Frankliniella occidentalis</i> |
| FOCC002283 | <i>Blimp-1</i>    | PRDM  | <i>Frankliniella occidentalis</i> |
| FOCC006171 | <i>Blimp-1</i>    | PRDM  | <i>Frankliniella occidentalis</i> |
| FOCC008985 | <i>Blimp-1</i>    | PRDM  | <i>Frankliniella occidentalis</i> |
| FOCC010349 | <i>Blimp-1</i>    | PRDM  | <i>Frankliniella occidentalis</i> |
| FOCC010364 | <i>Blimp-1</i>    | PRDM  | <i>Frankliniella occidentalis</i> |
| FOCC011749 | <i>Blimp-1</i>    | PRDM  | <i>Frankliniella occidentalis</i> |
| FOCC013507 | <i>Blimp-1</i>    | PRDM  | <i>Frankliniella occidentalis</i> |
| FOCC016863 | <i>Blimp-1</i>    | PRDM  | <i>Frankliniella occidentalis</i> |
| FOCC008815 | <i>egg</i>        | Suv   | <i>Frankliniella occidentalis</i> |
| FOCC008607 | <i>Ez</i>         | Ez    | <i>Frankliniella occidentalis</i> |
| FOCC016801 | <i>G9a</i>        | Suv   | <i>Frankliniella occidentalis</i> |
| FOCC002018 | <i>Hmt4-20</i>    | -     | <i>Frankliniella occidentalis</i> |
| FOCC001774 | <i>Mes-4</i>      | Ash   | <i>Frankliniella occidentalis</i> |
| FOCC010613 | <i>Set1</i>       | Trx   | <i>Frankliniella occidentalis</i> |
| FOCC009751 | <i>Set2</i>       | Ash   | <i>Frankliniella occidentalis</i> |
| FOCC009082 | <i>Set8</i>       | -     | <i>Frankliniella occidentalis</i> |
| FOCC015943 | <i>Set8</i>       | -     | <i>Frankliniella occidentalis</i> |
| FOCC016014 | <i>Set8</i>       | -     | <i>Frankliniella occidentalis</i> |
| FOCC016329 | <i>Set8</i>       | -     | <i>Frankliniella occidentalis</i> |
| FOCC001761 | <i>setd</i>       | SETD  | <i>Frankliniella occidentalis</i> |
| FOCC001759 | <i>setd</i>       | SETD  | <i>Frankliniella occidentalis</i> |
| FOCC017034 | <i>Smyd4-2</i>    | SMYD  | <i>Frankliniella occidentalis</i> |
| FOCC016997 | <i>Smyd4-2</i>    | SMYD  | <i>Frankliniella occidentalis</i> |
| FOCC005340 | <i>Smyd4-3</i>    | SMYD  | <i>Frankliniella occidentalis</i> |
| FOCC005014 | <i>Smyd4-3</i>    | SMYD  | <i>Frankliniella occidentalis</i> |
| FOCC007055 | <i>Smyd4-3</i>    | SMYD  | <i>Frankliniella occidentalis</i> |
| FOCC009401 | <i>Smyd5</i>      | SMYD  | <i>Frankliniella occidentalis</i> |
| FOCC010914 | <i>SmydA-1</i>    | SmydA | <i>Frankliniella occidentalis</i> |
| FOCC013277 | <i>SmydA-2</i>    | SmydA | <i>Frankliniella occidentalis</i> |
| FOCC013364 | <i>SmydA-2</i>    | SmydA | <i>Frankliniella occidentalis</i> |
| FOCC016039 | <i>SmydA-2</i>    | SmydA | <i>Frankliniella occidentalis</i> |
| FOCC016968 | <i>SmydA-3</i>    | SmydA | <i>Frankliniella occidentalis</i> |
| FOCC011484 | <i>SmydA-4</i>    | SmydA | <i>Frankliniella occidentalis</i> |
| FOCC017528 | <i>SmydA-8</i>    | SmydA | <i>Frankliniella occidentalis</i> |
| FOCC002677 | <i>Su(var)3-9</i> | Suv   | <i>Frankliniella occidentalis</i> |
| FOCC005471 | <i>Su(var)3-9</i> | Suv   | <i>Frankliniella occidentalis</i> |
| FOCC017059 | <i>suv</i>        | Suv   | <i>Frankliniella occidentalis</i> |
| FOCC010246 | <i>trr</i>        | Trx   | <i>Frankliniella occidentalis</i> |

|            |                    |       |                                   |
|------------|--------------------|-------|-----------------------------------|
| FOCC004505 | <i>trx</i>         | Trx   | <i>Frankliniella occidentalis</i> |
| FOCC008579 | <i>upSET(MLL5)</i> | -     | <i>Frankliniella occidentalis</i> |
| GBUE009708 | <i>ash1</i>        | Ash   | <i>Gerris buenoi</i>              |
| GBUE018405 | <i>Blimp-1</i>     | PRDM  | <i>Gerris buenoi</i>              |
| GBUE008804 | <i>egg</i>         | Suv   | <i>Gerris buenoi</i>              |
| GBUE017226 | <i>Ez</i>          | Ez    | <i>Gerris buenoi</i>              |
| GBUE005309 | <i>G9a</i>         | Suv   | <i>Gerris buenoi</i>              |
| GBUE006374 | <i>Hmt4-20</i>     | -     | <i>Gerris buenoi</i>              |
| GBUE012764 | <i>Mes-4</i>       | Ash   | <i>Gerris buenoi</i>              |
| GBUE019960 | <i>Set1</i>        | Trx   | <i>Gerris buenoi</i>              |
| GBUE000965 | <i>Set2</i>        | Ash   | <i>Gerris buenoi</i>              |
| GBUE013626 | <i>Set8</i>        | -     | <i>Gerris buenoi</i>              |
| GBUE010864 | <i>setd</i>        | SETD  | <i>Gerris buenoi</i>              |
| GBUE006756 | <i>Smyd3</i>       | SMYD  | <i>Gerris buenoi</i>              |
| GBUE017035 | <i>Smyd4-1</i>     | SMYD  | <i>Gerris buenoi</i>              |
| GBUE018953 | <i>Smyd4-2</i>     | SMYD  | <i>Gerris buenoi</i>              |
| GBUE003862 | <i>Smyd4-3</i>     | SMYD  | <i>Gerris buenoi</i>              |
| GBUE009762 | <i>Smyd4-3</i>     | SMYD  | <i>Gerris buenoi</i>              |
| GBUE004495 | <i>Smyd5</i>       | SMYD  | <i>Gerris buenoi</i>              |
| GBUE000004 | <i>SmydA-1</i>     | SmydA | <i>Gerris buenoi</i>              |
| GBUE000005 | <i>SmydA-4</i>     | SmydA | <i>Gerris buenoi</i>              |
| GBUE013250 | <i>SmydA-5</i>     | SmydA | <i>Gerris buenoi</i>              |
| GBUE017346 | <i>SmydA-8</i>     | SmydA | <i>Gerris buenoi</i>              |
| GBUE017347 | <i>SmydA-9</i>     | SmydA | <i>Gerris buenoi</i>              |
| GBUE007007 | <i>Su(var)3-9</i>  | Suv   | <i>Gerris buenoi</i>              |
| GBUE002656 | <i>trr</i>         | Trx   | <i>Gerris buenoi</i>              |
| GBUE010721 | <i>trx</i>         | Trx   | <i>Gerris buenoi</i>              |
| GBUE006188 | <i>upSET(MLL5)</i> | -     | <i>Gerris buenoi</i>              |
| GAUT000965 | -                  | -     | <i>Glossina austeni</i>           |
| GAUT039134 | -                  | -     | <i>Glossina austeni</i>           |
| GAUT003569 | <i>ash1</i>        | Ash   | <i>Glossina austeni</i>           |
| GAUT037360 | <i>Blimp-1</i>     | PRDM  | <i>Glossina austeni</i>           |
| GAUT051764 | <i>Ez</i>          | Ez    | <i>Glossina austeni</i>           |
| GAUT014335 | <i>G9a</i>         | Suv   | <i>Glossina austeni</i>           |
| GAUT021127 | <i>Hmt4-20</i>     | -     | <i>Glossina austeni</i>           |
| GAUT007110 | <i>Mes-4</i>       | Ash   | <i>Glossina austeni</i>           |
| GAUT010050 | <i>Set1</i>        | Trx   | <i>Glossina austeni</i>           |
| GAUT042724 | <i>Set2</i>        | Ash   | <i>Glossina austeni</i>           |
| GAUT051725 | <i>Set8</i>        | -     | <i>Glossina austeni</i>           |
| GAUT008299 | <i>setd</i>        | SETD  | <i>Glossina austeni</i>           |
| GAUT003063 | <i>Smyd4-1</i>     | SMYD  | <i>Glossina austeni</i>           |
| GAUT015030 | <i>Smyd4-2</i>     | SMYD  | <i>Glossina austeni</i>           |
| GAUT006445 | <i>Smyd4-3</i>     | SMYD  | <i>Glossina austeni</i>           |
| GAUT005982 | <i>Smyd5</i>       | SMYD  | <i>Glossina austeni</i>           |



|            |                   |       |                             |
|------------|-------------------|-------|-----------------------------|
| GAUT028521 | <i>SmydA-1</i>    | SmydA | <i>Glossina austeni</i>     |
| GAUT003878 | <i>SmydA-2</i>    | SmydA | <i>Glossina austeni</i>     |
| GAUT012548 | <i>SmydA-3</i>    | SmydA | <i>Glossina austeni</i>     |
| GAUT050092 | <i>SmydA-4</i>    | SmydA | <i>Glossina austeni</i>     |
| GAUT023068 | <i>SmydA-5</i>    | SmydA | <i>Glossina austeni</i>     |
| GAUT015085 | <i>SmydA-6</i>    | SmydA | <i>Glossina austeni</i>     |
| GAUT020408 | <i>SmydA-6</i>    | SmydA | <i>Glossina austeni</i>     |
| GAUT015280 | <i>SmydA-8</i>    | SmydA | <i>Glossina austeni</i>     |
| GAUT015283 | <i>SmydA-8</i>    | SmydA | <i>Glossina austeni</i>     |
| GAUT015281 | <i>SmydA-9</i>    | SmydA | <i>Glossina austeni</i>     |
| GAUT002773 | <i>suv</i>        | Suv   | <i>Glossina austeni</i>     |
| GAUT039876 | <i>trr</i>        | Trx   | <i>Glossina austeni</i>     |
| GAUT028766 | <i>trx</i>        | Trx   | <i>Glossina austeni</i>     |
| GBRI006832 | -                 | -     | <i>Glossina brevipalpis</i> |
| GBRI008909 | -                 | -     | <i>Glossina brevipalpis</i> |
| GBRI030513 | <i>ash1</i>       | Ash   | <i>Glossina brevipalpis</i> |
| GBRI006374 | <i>Blimp-1</i>    | PRDM  | <i>Glossina brevipalpis</i> |
| GBRI044332 | <i>egg</i>        | Suv   | <i>Glossina brevipalpis</i> |
| GBRI031107 | <i>Ez</i>         | Ez    | <i>Glossina brevipalpis</i> |
| GBRI045079 | <i>G9a</i>        | Suv   | <i>Glossina brevipalpis</i> |
| GBRI014412 | <i>Hmt4-20</i>    | -     | <i>Glossina brevipalpis</i> |
| GBRI036913 | <i>Mes-4</i>      | Ash   | <i>Glossina brevipalpis</i> |
| GBRI009791 | <i>Set1</i>       | Trx   | <i>Glossina brevipalpis</i> |
| GBRI021201 | <i>Set2</i>       | Ash   | <i>Glossina brevipalpis</i> |
| GBRI044844 | <i>Set2</i>       | Ash   | <i>Glossina brevipalpis</i> |
| GBRI021014 | <i>Set8</i>       | -     | <i>Glossina brevipalpis</i> |
| GBRI007875 | <i>setd</i>       | SETD  | <i>Glossina brevipalpis</i> |
| GBRI009726 | <i>Smyd4-1</i>    | SMYD  | <i>Glossina brevipalpis</i> |
| GBRI029322 | <i>Smyd4-2</i>    | SMYD  | <i>Glossina brevipalpis</i> |
| GBRI026790 | <i>Smyd4-3</i>    | SMYD  | <i>Glossina brevipalpis</i> |
| GBRI029821 | <i>Smyd5</i>      | SMYD  | <i>Glossina brevipalpis</i> |
| GBRI025958 | <i>SmydA-1</i>    | SmydA | <i>Glossina brevipalpis</i> |
| GBRI012014 | <i>SmydA-2</i>    | SmydA | <i>Glossina brevipalpis</i> |
| GBRI026624 | <i>SmydA-3</i>    | SmydA | <i>Glossina brevipalpis</i> |
| GBRI033680 | <i>SmydA-4</i>    | SmydA | <i>Glossina brevipalpis</i> |
| GBRI005440 | <i>SmydA-6</i>    | SmydA | <i>Glossina brevipalpis</i> |
| GBRI043141 | <i>SmydA-6</i>    | SmydA | <i>Glossina brevipalpis</i> |
| GBRI044001 | <i>SmydA-8</i>    | SmydA | <i>Glossina brevipalpis</i> |
| GBRI044006 | <i>SmydA-8</i>    | SmydA | <i>Glossina brevipalpis</i> |
| GBRI044002 | <i>SmydA-9</i>    | SmydA | <i>Glossina brevipalpis</i> |
| GBRI043534 | <i>Su(var)3-9</i> | Suv   | <i>Glossina brevipalpis</i> |
| GBRI014352 | <i>Su(var)3-9</i> | Suv   | <i>Glossina brevipalpis</i> |
| GBRI031809 | <i>suv</i>        | Suv   | <i>Glossina brevipalpis</i> |
| GBRI003992 | <i>trr</i>        | Trx   | <i>Glossina brevipalpis</i> |

|            |                    |       |                             |
|------------|--------------------|-------|-----------------------------|
| GBRI019428 | <i>trx</i>         | Trx   | <i>Glossina brevipalpis</i> |
| GBRI030568 | <i>upSET(MLL5)</i> | -     | <i>Glossina brevipalpis</i> |
| GFUI032853 | -                  | -     | <i>Glossina fuscipes</i>    |
| GFUI022615 | -                  | -     | <i>Glossina fuscipes</i>    |
| GFUI025617 | <i>ash1</i>        | Ash   | <i>Glossina fuscipes</i>    |
| GFUI020100 | <i>Blimp-1</i>     | PRDM  | <i>Glossina fuscipes</i>    |
| GFUI017483 | <i>egg</i>         | Suv   | <i>Glossina fuscipes</i>    |
| GFUI014956 | <i>G9a</i>         | Suv   | <i>Glossina fuscipes</i>    |
| GFUI051362 | <i>Hmt4-20</i>     | -     | <i>Glossina fuscipes</i>    |
| GFUI009308 | <i>Mes-4</i>       | Ash   | <i>Glossina fuscipes</i>    |
| GFUI010890 | <i>Set1</i>        | Trx   | <i>Glossina fuscipes</i>    |
| GFUI024474 | <i>Set2</i>        | Ash   | <i>Glossina fuscipes</i>    |
| GFUI035687 | <i>Set8</i>        | -     | <i>Glossina fuscipes</i>    |
| GFUI020620 | <i>setd</i>        | SETD  | <i>Glossina fuscipes</i>    |
| GFUI046686 | <i>Smyd4-1</i>     | SMYD  | <i>Glossina fuscipes</i>    |
| GFUI031085 | <i>Smyd4-1</i>     | SMYD  | <i>Glossina fuscipes</i>    |
| GFUI002338 | <i>Smyd4-2</i>     | SMYD  | <i>Glossina fuscipes</i>    |
| GFUI050271 | <i>Smyd4-3</i>     | SMYD  | <i>Glossina fuscipes</i>    |
| GFUI000464 | <i>Smyd5</i>       | SMYD  | <i>Glossina fuscipes</i>    |
| GFUI017459 | <i>SmydA-1</i>     | SmydA | <i>Glossina fuscipes</i>    |
| GFUI044864 | <i>SmydA-2</i>     | SmydA | <i>Glossina fuscipes</i>    |
| GFUI023273 | <i>SmydA-3</i>     | SmydA | <i>Glossina fuscipes</i>    |
| GFUI051070 | <i>SmydA-4</i>     | SmydA | <i>Glossina fuscipes</i>    |
| GFUI011622 | <i>SmydA-5</i>     | SmydA | <i>Glossina fuscipes</i>    |
| GFUI043484 | <i>SmydA-6</i>     | SmydA | <i>Glossina fuscipes</i>    |
| GFUI026980 | <i>SmydA-6</i>     | SmydA | <i>Glossina fuscipes</i>    |
| GFUI013391 | <i>SmydA-8</i>     | SmydA | <i>Glossina fuscipes</i>    |
| GFUI013397 | <i>SmydA-8</i>     | SmydA | <i>Glossina fuscipes</i>    |
| GFUI013396 | <i>SmydA-9</i>     | SmydA | <i>Glossina fuscipes</i>    |
| GFUI002253 | <i>Su(var)3-9</i>  | Suv   | <i>Glossina fuscipes</i>    |
| GFUI033386 | <i>suv</i>         | Suv   | <i>Glossina fuscipes</i>    |
| GFUI052279 | <i>suv</i>         | Suv   | <i>Glossina fuscipes</i>    |
| GFUI003837 | <i>trr</i>         | Trx   | <i>Glossina fuscipes</i>    |
| GFUI033201 | <i>trr</i>         | Trx   | <i>Glossina fuscipes</i>    |
| GFUI040605 | <i>trx</i>         | Trx   | <i>Glossina fuscipes</i>    |
| GFUI009588 | <i>upSET(MLL5)</i> | -     | <i>Glossina fuscipes</i>    |
| GMOY002463 | -                  | -     | <i>Glossina morsitans</i>   |
| GMOY005928 | <i>ash1</i>        | Ash   | <i>Glossina morsitans</i>   |
| GMOY001750 | <i>Blimp-1</i>     | PRDM  | <i>Glossina morsitans</i>   |
| GMOY012045 | <i>egg</i>         | Suv   | <i>Glossina morsitans</i>   |
| GMOY001127 | <i>Ez</i>          | Ez    | <i>Glossina morsitans</i>   |
| GMOY006982 | <i>G9a</i>         | Suv   | <i>Glossina morsitans</i>   |
| GMOY000051 | <i>Hmt4-20</i>     | -     | <i>Glossina morsitans</i>   |
| GMOY006253 | <i>Mes-4</i>       | Ash   | <i>Glossina morsitans</i>   |

|            |                    |       |                            |
|------------|--------------------|-------|----------------------------|
| GMOY007151 | <i>Set1</i>        | Trx   | <i>Glossina morsitans</i>  |
| GMOY010695 | <i>Set2</i>        | Ash   | <i>Glossina morsitans</i>  |
| GMOY005450 | <i>Set8</i>        | -     | <i>Glossina morsitans</i>  |
| GMOY005462 | <i>setd</i>        | SETD  | <i>Glossina morsitans</i>  |
| GMOY000548 | <i>Smyd4-1</i>     | SMYD  | <i>Glossina morsitans</i>  |
| GMOY003979 | <i>Smyd4-2</i>     | SMYD  | <i>Glossina morsitans</i>  |
| GMOY007161 | <i>Smyd4-3</i>     | SMYD  | <i>Glossina morsitans</i>  |
| GMOY003547 | <i>Smyd5</i>       | SMYD  | <i>Glossina morsitans</i>  |
| GMOY007823 | <i>SmydA-2</i>     | SmydA | <i>Glossina morsitans</i>  |
| GMOY003089 | <i>SmydA-3</i>     | SmydA | <i>Glossina morsitans</i>  |
| GMOY001698 | <i>SmydA-4</i>     | SmydA | <i>Glossina morsitans</i>  |
| GMOY009115 | <i>SmydA-5</i>     | SmydA | <i>Glossina morsitans</i>  |
| GMOY007184 | <i>SmydA-6</i>     | SmydA | <i>Glossina morsitans</i>  |
| GMOY011379 | <i>SmydA-6</i>     | SmydA | <i>Glossina morsitans</i>  |
| GMOY004217 | <i>SmydA-8</i>     | SmydA | <i>Glossina morsitans</i>  |
| GMOY004216 | <i>SmydA-9</i>     | SmydA | <i>Glossina morsitans</i>  |
| GMOY011471 | <i>Su(var)3-9</i>  | Suv   | <i>Glossina morsitans</i>  |
| GMOY009260 | <i>Su(var)3-9</i>  | Suv   | <i>Glossina morsitans</i>  |
| GMOY004169 | <i>trr</i>         | Trx   | <i>Glossina morsitans</i>  |
| GMOY002816 | <i>trx</i>         | Trx   | <i>Glossina morsitans</i>  |
| GMOY004407 | <i>upSET(MLL5)</i> | -     | <i>Glossina morsitans</i>  |
| GPAI006159 | -                  | -     | <i>Glossina pallidipes</i> |
| GPAI017683 | <i>ash1</i>        | Ash   | <i>Glossina pallidipes</i> |
| GPAI007592 | <i>Blimp-1</i>     | PRDM  | <i>Glossina pallidipes</i> |
| GPAI043842 | <i>egg</i>         | Suv   | <i>Glossina pallidipes</i> |
| GPAI005269 | <i>G9a</i>         | Suv   | <i>Glossina pallidipes</i> |
| GPAI046219 | <i>Hmt4-20</i>     | -     | <i>Glossina pallidipes</i> |
| GPAI007879 | <i>Mes-4</i>       | Ash   | <i>Glossina pallidipes</i> |
| GPAI039142 | <i>Set1</i>        | Trx   | <i>Glossina pallidipes</i> |
| GPAI036866 | <i>Set2</i>        | Ash   | <i>Glossina pallidipes</i> |
| GPAI045113 | <i>Set8</i>        | -     | <i>Glossina pallidipes</i> |
| GPAI040696 | <i>setd</i>        | SETD  | <i>Glossina pallidipes</i> |
| GPAI045330 | <i>Smyd4-1</i>     | SMYD  | <i>Glossina pallidipes</i> |
| GPAI013502 | <i>Smyd4-2</i>     | SMYD  | <i>Glossina pallidipes</i> |
| GPAI038323 | <i>Smyd4-3</i>     | SMYD  | <i>Glossina pallidipes</i> |
| GPAI032096 | <i>Smyd4-4</i>     | SMYD  | <i>Glossina pallidipes</i> |
| GPAI010418 | <i>Smyd5</i>       | SMYD  | <i>Glossina pallidipes</i> |
| GPAI049087 | <i>SmydA-1</i>     | SmydA | <i>Glossina pallidipes</i> |
| GPAI025288 | <i>SmydA-2</i>     | SmydA | <i>Glossina pallidipes</i> |
| GPAI033687 | <i>SmydA-3</i>     | SmydA | <i>Glossina pallidipes</i> |
| GPAI031397 | <i>SmydA-4</i>     | SmydA | <i>Glossina pallidipes</i> |
| GPAI044832 | <i>SmydA-5</i>     | SmydA | <i>Glossina pallidipes</i> |
| GPAI015004 | <i>SmydA-6</i>     | SmydA | <i>Glossina pallidipes</i> |
| GPAI040524 | <i>SmydA-6</i>     | SmydA | <i>Glossina pallidipes</i> |

|            |                    |       |                            |
|------------|--------------------|-------|----------------------------|
| GPAI009323 | <i>SmydA-8</i>     | SmydA | <i>Glossina pallidipes</i> |
| GPAI009327 | <i>SmydA-8</i>     | SmydA | <i>Glossina pallidipes</i> |
| GPAI009335 | <i>SmydA-9</i>     | SmydA | <i>Glossina pallidipes</i> |
| GPAI047623 | <i>Su(var)3-9</i>  | Suv   | <i>Glossina pallidipes</i> |
| GPAI035612 | <i>suv</i>         | Suv   | <i>Glossina pallidipes</i> |
| GPAI026359 | <i>trr</i>         | Trx   | <i>Glossina pallidipes</i> |
| GPAI030239 | <i>trx</i>         | Trx   | <i>Glossina pallidipes</i> |
| GPAI017716 | <i>upSET(MLL5)</i> | -     | <i>Glossina pallidipes</i> |
| GPPI011201 | -                  | -     | <i>Glossina palpalis</i>   |
| GPPI022844 | -                  | -     | <i>Glossina palpalis</i>   |
| GPPI035533 | <i>ash1</i>        | Ash   | <i>Glossina palpalis</i>   |
| GPPI031332 | <i>Blimp-1</i>     | PRDM  | <i>Glossina palpalis</i>   |
| GPPI038391 | <i>egg</i>         | Suv   | <i>Glossina palpalis</i>   |
| GPPI023005 | <i>Ez</i>          | Ez    | <i>Glossina palpalis</i>   |
| GPPI020075 | <i>G9a</i>         | Suv   | <i>Glossina palpalis</i>   |
| GPPI027364 | <i>Mes-4</i>       | Ash   | <i>Glossina palpalis</i>   |
| GPPI023174 | <i>Set1</i>        | Trx   | <i>Glossina palpalis</i>   |
| GPPI024774 | <i>Set2</i>        | Ash   | <i>Glossina palpalis</i>   |
| GPPI020621 | <i>Set8</i>        | -     | <i>Glossina palpalis</i>   |
| GPPI042244 | <i>setd</i>        | SETD  | <i>Glossina palpalis</i>   |
| GPPI046802 | <i>Smyd4-1</i>     | SMYD  | <i>Glossina palpalis</i>   |
| GPPI040565 | <i>Smyd4-1</i>     | SMYD  | <i>Glossina palpalis</i>   |
| GPPI039669 | <i>Smyd4-2</i>     | SMYD  | <i>Glossina palpalis</i>   |
| GPPI031007 | <i>Smyd4-3</i>     | SMYD  | <i>Glossina palpalis</i>   |
| GPPI035949 | <i>Smyd5</i>       | SMYD  | <i>Glossina palpalis</i>   |
| GPPI001551 | <i>SmydA-1</i>     | SmydA | <i>Glossina palpalis</i>   |
| GPPI020866 | <i>SmydA-2</i>     | SmydA | <i>Glossina palpalis</i>   |
| GPPI003369 | <i>SmydA-3</i>     | SmydA | <i>Glossina palpalis</i>   |
| GPPI012558 | <i>SmydA-4</i>     | SmydA | <i>Glossina palpalis</i>   |
| GPPI016194 | <i>SmydA-5</i>     | SmydA | <i>Glossina palpalis</i>   |
| GPPI041869 | <i>SmydA-6</i>     | SmydA | <i>Glossina palpalis</i>   |
| GPPI044611 | <i>SmydA-6</i>     | SmydA | <i>Glossina palpalis</i>   |
| GPPI000369 | <i>SmydA-8</i>     | SmydA | <i>Glossina palpalis</i>   |
| GPPI001276 | <i>SmydA-8</i>     | SmydA | <i>Glossina palpalis</i>   |
| GPPI051160 | <i>SmydA-9</i>     | SmydA | <i>Glossina palpalis</i>   |
| GPPI028098 | <i>Su(var)3-9</i>  | Suv   | <i>Glossina palpalis</i>   |
| GPPI047825 | <i>suv</i>         | Suv   | <i>Glossina palpalis</i>   |
| GPPI037952 | <i>trr</i>         | Trx   | <i>Glossina palpalis</i>   |
| GPPI040878 | <i>trx</i>         | Trx   | <i>Glossina palpalis</i>   |
| Hlab06559  | <i>ash1</i>        | Ash   | <i>Habropoda laboriosa</i> |
| Hlab06779  | <i>Blimp-1</i>     | PRDM  | <i>Habropoda laboriosa</i> |
| Hlab05635  | <i>egg</i>         | Suv   | <i>Habropoda laboriosa</i> |
| Hlab13037  | <i>Ez</i>          | Ez    | <i>Habropoda laboriosa</i> |
| Hlab12868  | <i>G9a</i>         | Suv   | <i>Habropoda laboriosa</i> |

|            |                    |       |                            |
|------------|--------------------|-------|----------------------------|
| Hlab11520  | <i>Hmt4-20</i>     | -     | <i>Habropoda laboriosa</i> |
| Hlab01507  | <i>Mes-4</i>       | Ash   | <i>Habropoda laboriosa</i> |
| Hlab06030  | <i>Set1</i>        | Trx   | <i>Habropoda laboriosa</i> |
| Hlab07675  | <i>Set2</i>        | Ash   | <i>Habropoda laboriosa</i> |
| Hlab10749  | <i>Set8</i>        | -     | <i>Habropoda laboriosa</i> |
| Hlab08772  | <i>setd</i>        | SETD  | <i>Habropoda laboriosa</i> |
| Hlab08770  | <i>setd</i>        | SETD  | <i>Habropoda laboriosa</i> |
| Hlab10869  | <i>Smyd4-2</i>     | SMYD  | <i>Habropoda laboriosa</i> |
| Hlab03265  | <i>Smyd4-2</i>     | SMYD  | <i>Habropoda laboriosa</i> |
| Hlab02978  | <i>Smyd4-3</i>     | SMYD  | <i>Habropoda laboriosa</i> |
| Hlab06401  | <i>Smyd4-3</i>     | SMYD  | <i>Habropoda laboriosa</i> |
| Hlab10576  | <i>Smyd4-3</i>     | SMYD  | <i>Habropoda laboriosa</i> |
| Hlab03516  | <i>Smyd4-4</i>     | SMYD  | <i>Habropoda laboriosa</i> |
| Hlab08038  | <i>Smyd4-4</i>     | SMYD  | <i>Habropoda laboriosa</i> |
| Hlab11342  | <i>Smyd5</i>       | SMYD  | <i>Habropoda laboriosa</i> |
| Hlab11165  | <i>SmydA-1</i>     | SmydA | <i>Habropoda laboriosa</i> |
| Hlab13506  | <i>SmydA-3</i>     | SmydA | <i>Habropoda laboriosa</i> |
| Hlab13511  | <i>SmydA-4</i>     | SmydA | <i>Habropoda laboriosa</i> |
| Hlab02530  | <i>SmydA-5</i>     | SmydA | <i>Habropoda laboriosa</i> |
| Hlab11466  | <i>SmydA-8</i>     | SmydA | <i>Habropoda laboriosa</i> |
| Hlab05757  | <i>Su(var)3-9</i>  | Suv   | <i>Habropoda laboriosa</i> |
| Hlab05767  | <i>suv</i>         | Suv   | <i>Habropoda laboriosa</i> |
| Hlab13473  | <i>trr</i>         | Trx   | <i>Habropoda laboriosa</i> |
| Hlab13391  | <i>trx</i>         | Trx   | <i>Habropoda laboriosa</i> |
| Hlab11190  | <i>upSET(MLL5)</i> | -     | <i>Habropoda laboriosa</i> |
| HHAL006761 | -                  | -     | <i>Halyomorpha halys</i>   |
| HHAL002221 | <i>Blimp-1</i>     | PRDM  | <i>Halyomorpha halys</i>   |
| HHAL006241 | <i>egg</i>         | Suv   | <i>Halyomorpha halys</i>   |
| HHAL006240 | <i>egg</i>         | Suv   | <i>Halyomorpha halys</i>   |
| HHAL005772 | <i>Ez</i>          | Ez    | <i>Halyomorpha halys</i>   |
| HHAL006963 | <i>G9a</i>         | Suv   | <i>Halyomorpha halys</i>   |
| HHAL009894 | <i>Hmt4-20</i>     | -     | <i>Halyomorpha halys</i>   |
| HHAL000815 | <i>Mes-4</i>       | Ash   | <i>Halyomorpha halys</i>   |
| HHAL005878 | <i>Set1</i>        | Trx   | <i>Halyomorpha halys</i>   |
| HHAL006642 | <i>Set2</i>        | Ash   | <i>Halyomorpha halys</i>   |
| HHAL003401 | <i>Set8</i>        | -     | <i>Halyomorpha halys</i>   |
| HHAL007456 | <i>setd</i>        | SETD  | <i>Halyomorpha halys</i>   |
| HHAL009003 | <i>Smyd3</i>       | SMYD  | <i>Halyomorpha halys</i>   |
| HHAL000090 | <i>Smyd4-3</i>     | SMYD  | <i>Halyomorpha halys</i>   |
| HHAL004593 | <i>Smyd4-3</i>     | SMYD  | <i>Halyomorpha halys</i>   |
| HHAL003302 | <i>Smyd4-4</i>     | SMYD  | <i>Halyomorpha halys</i>   |
| HHAL001411 | <i>Smyd5</i>       | SMYD  | <i>Halyomorpha halys</i>   |
| HHAL000853 | <i>SmydA-1</i>     | SmydA | <i>Halyomorpha halys</i>   |
| HHAL003743 | <i>SmydA-3</i>     | SmydA | <i>Halyomorpha halys</i>   |

|            |                    |       |                              |
|------------|--------------------|-------|------------------------------|
| HHAL000852 | <i>SmydA-4</i>     | SmydA | <i>Halyomorpha halys</i>     |
| HHAL007047 | <i>SmydA-5</i>     | SmydA | <i>Halyomorpha halys</i>     |
| HHAL002785 | <i>SmydA-8</i>     | SmydA | <i>Halyomorpha halys</i>     |
| HHAL008217 | <i>Su(var)3-9</i>  | Suv   | <i>Halyomorpha halys</i>     |
| HHAL007301 | <i>suv</i>         | Suv   | <i>Halyomorpha halys</i>     |
| HHAL009337 | <i>trr</i>         | Trx   | <i>Halyomorpha halys</i>     |
| HHAL002662 | <i>trx</i>         | Trx   | <i>Halyomorpha halys</i>     |
| Hsal_10489 | -                  | -     | <i>Harpegnathos saltator</i> |
| Hsal_10054 | <i>ash1</i>        | Ash   | <i>Harpegnathos saltator</i> |
| Hsal_05330 | <i>Ez</i>          | Ez    | <i>Harpegnathos saltator</i> |
| Hsal_12111 | <i>G9a</i>         | Suv   | <i>Harpegnathos saltator</i> |
| Hsal_07893 | <i>Hmt4-20</i>     | -     | <i>Harpegnathos saltator</i> |
| Hsal_01244 | <i>Set1</i>        | Trx   | <i>Harpegnathos saltator</i> |
| Hsal_05593 | <i>Set8</i>        | -     | <i>Harpegnathos saltator</i> |
| Hsal_06751 | <i>setd</i>        | SETD  | <i>Harpegnathos saltator</i> |
| Hsal_06753 | <i>setd</i>        | SETD  | <i>Harpegnathos saltator</i> |
| Hsal_07051 | <i>Smyd4-2</i>     | SMYD  | <i>Harpegnathos saltator</i> |
| Hsal_11656 | <i>Smyd4-2</i>     | SMYD  | <i>Harpegnathos saltator</i> |
| Hsal_08142 | <i>Smyd4-3</i>     | SMYD  | <i>Harpegnathos saltator</i> |
| Hsal_00516 | <i>Smyd4-3</i>     | SMYD  | <i>Harpegnathos saltator</i> |
| Hsal_10487 | <i>Smyd4-3</i>     | SMYD  | <i>Harpegnathos saltator</i> |
| Hsal_10488 | <i>Smyd4-3</i>     | SMYD  | <i>Harpegnathos saltator</i> |
| Hsal_10252 | <i>Smyd4-4</i>     | SMYD  | <i>Harpegnathos saltator</i> |
| Hsal_14332 | <i>Smyd5</i>       | SMYD  | <i>Harpegnathos saltator</i> |
| Hsal_03432 | <i>SmydA-3</i>     | SmydA | <i>Harpegnathos saltator</i> |
| Hsal_03431 | <i>SmydA-4</i>     | SmydA | <i>Harpegnathos saltator</i> |
| Hsal_08938 | <i>SmydA-5</i>     | SmydA | <i>Harpegnathos saltator</i> |
| Hsal_14941 | <i>SmydA-8</i>     | SmydA | <i>Harpegnathos saltator</i> |
| Hsal_14066 | <i>suv</i>         | Suv   | <i>Harpegnathos saltator</i> |
| Hsal_08754 | <i>upSET(MLL5)</i> | -     | <i>Harpegnathos saltator</i> |
| HMEL007072 | <i>Blimp-1</i>     | PRDM  | <i>Heliconius melpomene</i>  |
| HMEL014564 | <i>egg</i>         | Suv   | <i>Heliconius melpomene</i>  |
| HMEL005664 | <i>Ez</i>          | Ez    | <i>Heliconius melpomene</i>  |
| HMEL015424 | <i>G9a</i>         | Suv   | <i>Heliconius melpomene</i>  |
| HMEL017733 | <i>Hmt4-20</i>     | -     | <i>Heliconius melpomene</i>  |
| HMEL016949 | <i>Mes-4</i>       | Ash   | <i>Heliconius melpomene</i>  |
| HMEL006851 | <i>Set1</i>        | Trx   | <i>Heliconius melpomene</i>  |
| HMEL017250 | <i>Set2</i>        | Ash   | <i>Heliconius melpomene</i>  |
| HMEL006860 | <i>Set8</i>        | -     | <i>Heliconius melpomene</i>  |
| HMEL015094 | <i>Smyd3</i>       | SMYD  | <i>Heliconius melpomene</i>  |
| HMEL007274 | <i>Smyd4-1</i>     | SMYD  | <i>Heliconius melpomene</i>  |
| HMEL010330 | <i>Smyd4-3</i>     | SMYD  | <i>Heliconius melpomene</i>  |
| HMEL003425 | <i>Smyd4-4</i>     | SMYD  | <i>Heliconius melpomene</i>  |
| HMEL016221 | <i>Smyd5</i>       | SMYD  | <i>Heliconius melpomene</i>  |

|            |                    |       |                                |
|------------|--------------------|-------|--------------------------------|
| HMEL008018 | <i>SmydA-2</i>     | SmydA | <i>Heliconius melpomene</i>    |
| HMEL005185 | <i>SmydA-4</i>     | SmydA | <i>Heliconius melpomene</i>    |
| HMEL017192 | <i>SmydA-8</i>     | SmydA | <i>Heliconius melpomene</i>    |
| HMEL006496 | <i>Su(var)3-9</i>  | Suv   | <i>Heliconius melpomene</i>    |
| HMEL003313 | <i>suv</i>         | Suv   | <i>Heliconius melpomene</i>    |
| HMEL004761 | <i>trr</i>         | Trx   | <i>Heliconius melpomene</i>    |
| HMEL013536 | <i>trx</i>         | Trx   | <i>Heliconius melpomene</i>    |
| HMEL016751 | <i>upSET(MLL5)</i> | -     | <i>Heliconius melpomene</i>    |
| HVIT000975 | <i>Blimp-1</i>     | PRDM  | <i>Homalodisca vitripennis</i> |
| HVIT015263 | <i>Blimp-1</i>     | PRDM  | <i>Homalodisca vitripennis</i> |
| HVIT026928 | <i>egg</i>         | Suv   | <i>Homalodisca vitripennis</i> |
| HVIT032230 | <i>egg</i>         | Suv   | <i>Homalodisca vitripennis</i> |
| HVIT002875 | <i>Ez</i>          | Ez    | <i>Homalodisca vitripennis</i> |
| HVIT004712 | <i>G9a</i>         | Suv   | <i>Homalodisca vitripennis</i> |
| HVIT021329 | <i>Hmt4-20</i>     | -     | <i>Homalodisca vitripennis</i> |
| HVIT010716 | <i>Mes-4</i>       | Ash   | <i>Homalodisca vitripennis</i> |
| HVIT010088 | <i>Set1</i>        | Trx   | <i>Homalodisca vitripennis</i> |
| HVIT015244 | <i>Set1</i>        | Trx   | <i>Homalodisca vitripennis</i> |
| HVIT015536 | <i>Set2</i>        | Ash   | <i>Homalodisca vitripennis</i> |
| HVIT016239 | <i>Set8</i>        | -     | <i>Homalodisca vitripennis</i> |
| HVIT026895 | <i>setd</i>        | SETD  | <i>Homalodisca vitripennis</i> |
| HVIT026896 | <i>setd</i>        | SETD  | <i>Homalodisca vitripennis</i> |
| HVIT001096 | <i>Smyd4-2</i>     | SMYD  | <i>Homalodisca vitripennis</i> |
| HVIT000155 | <i>Smyd4-3</i>     | SMYD  | <i>Homalodisca vitripennis</i> |
| HVIT007220 | <i>Smyd4-3</i>     | SMYD  | <i>Homalodisca vitripennis</i> |
| HVIT022921 | <i>Smyd4-3</i>     | SMYD  | <i>Homalodisca vitripennis</i> |
| HVIT003655 | <i>Smyd5</i>       | SMYD  | <i>Homalodisca vitripennis</i> |
| HVIT005436 | <i>SmydA-1</i>     | SmydA | <i>Homalodisca vitripennis</i> |
| HVIT004981 | <i>SmydA-2</i>     | SmydA | <i>Homalodisca vitripennis</i> |
| HVIT019774 | <i>SmydA-2</i>     | SmydA | <i>Homalodisca vitripennis</i> |
| HVIT005437 | <i>SmydA-4</i>     | SmydA | <i>Homalodisca vitripennis</i> |
| HVIT004968 | <i>SmydA-5</i>     | SmydA | <i>Homalodisca vitripennis</i> |
| HVIT021581 | <i>SmydA-8</i>     | SmydA | <i>Homalodisca vitripennis</i> |
| HVIT015553 | <i>Su(var)3-9</i>  | Suv   | <i>Homalodisca vitripennis</i> |
| HVIT018813 | <i>suv</i>         | Suv   | <i>Homalodisca vitripennis</i> |
| HVIT011515 | <i>trr</i>         | Trx   | <i>Homalodisca vitripennis</i> |
| HVIT018408 | <i>trx</i>         | Trx   | <i>Homalodisca vitripennis</i> |
| HAZT011949 | <i>ash1</i>        | Ash   | <i>Hyalella azteca</i>         |
| HAZT009026 | <i>Blimp-1</i>     | PRDM  | <i>Hyalella azteca</i>         |
| HAZT001775 | <i>egg</i>         | Suv   | <i>Hyalella azteca</i>         |
| HAZT005646 | <i>Ez</i>          | Ez    | <i>Hyalella azteca</i>         |
| HAZT000211 | <i>Ez</i>          | Ez    | <i>Hyalella azteca</i>         |
| HAZT012700 | <i>G9a</i>         | Suv   | <i>Hyalella azteca</i>         |
| HAZT002495 | <i>Hmt4-20</i>     | -     | <i>Hyalella azteca</i>         |

|            |                    |       |                          |
|------------|--------------------|-------|--------------------------|
| HAZT012332 | <i>Mes-4</i>       | Ash   | <i>Hyaella azteca</i>    |
| HAZT002193 | <i>Set1</i>        | Trx   | <i>Hyaella azteca</i>    |
| HAZT001741 | <i>Set2</i>        | Ash   | <i>Hyaella azteca</i>    |
| HAZT003710 | <i>Set8</i>        | -     | <i>Hyaella azteca</i>    |
| HAZT003709 | <i>Set8</i>        | -     | <i>Hyaella azteca</i>    |
| HAZT005237 | <i>Smyd4-3</i>     | SMYD  | <i>Hyaella azteca</i>    |
| HAZT011103 | <i>SmydA-2</i>     | SmydA | <i>Hyaella azteca</i>    |
| HAZT002301 | <i>SmydA-2</i>     | SmydA | <i>Hyaella azteca</i>    |
| HAZT002302 | <i>SmydA-2</i>     | SmydA | <i>Hyaella azteca</i>    |
| HAZT011434 | <i>Su(var)3-9</i>  | Suv   | <i>Hyaella azteca</i>    |
| HAZT011295 | <i>trr</i>         | Trx   | <i>Hyaella azteca</i>    |
| HAZT000729 | <i>trx</i>         | Trx   | <i>Hyaella azteca</i>    |
| HAZT011847 | <i>trx</i>         | Trx   | <i>Hyaella azteca</i>    |
| HAZT004622 | <i>upSET(MLL5)</i> | -     | <i>Hyaella azteca</i>    |
| ISCW020125 | -                  | -     | <i>Ixodes scapularis</i> |
| ISCW005314 | <i>ash1</i>        | Ash   | <i>Ixodes scapularis</i> |
| ISCW001711 | <i>egg</i>         | Suv   | <i>Ixodes scapularis</i> |
| ISCW005550 | <i>egg</i>         | Suv   | <i>Ixodes scapularis</i> |
| ISCW020151 | <i>Ez</i>          | Ez    | <i>Ixodes scapularis</i> |
| ISCW019618 | <i>G9a</i>         | Suv   | <i>Ixodes scapularis</i> |
| ISCW004542 | <i>Mes-4</i>       | Ash   | <i>Ixodes scapularis</i> |
| ISCW009292 | <i>Set1</i>        | Trx   | <i>Ixodes scapularis</i> |
| ISCW013039 | <i>Set2</i>        | Ash   | <i>Ixodes scapularis</i> |
| ISCW020034 | <i>Set8</i>        | -     | <i>Ixodes scapularis</i> |
| ISCW011867 | <i>setd</i>        | SETD  | <i>Ixodes scapularis</i> |
| ISCW000409 | <i>Smyd4-3</i>     | SMYD  | <i>Ixodes scapularis</i> |
| ISCW000706 | <i>Smyd5</i>       | SMYD  | <i>Ixodes scapularis</i> |
| ISCW021420 | <i>suv</i>         | Suv   | <i>Ixodes scapularis</i> |
| ISCW020985 | <i>trx</i>         | Trx   | <i>Ixodes scapularis</i> |
| ISCW020685 | <i>trx</i>         | Trx   | <i>Ixodes scapularis</i> |
| ISCW020048 | <i>upSET(MLL5)</i> | -     | <i>Ixodes scapularis</i> |
| LFUL019513 | -                  | -     | <i>Ladona fulva</i>      |
| LFUL005820 | <i>Blimp-1</i>     | PRDM  | <i>Ladona fulva</i>      |
| LFUL018789 | <i>Blimp-1</i>     | PRDM  | <i>Ladona fulva</i>      |
| LFUL002871 | <i>egg</i>         | Suv   | <i>Ladona fulva</i>      |
| LFUL002215 | <i>Ez</i>          | Ez    | <i>Ladona fulva</i>      |
| LFUL012693 | <i>G9a</i>         | Suv   | <i>Ladona fulva</i>      |
| LFUL015879 | <i>Hmt4-20</i>     | -     | <i>Ladona fulva</i>      |
| LFUL016378 | <i>Mes-4</i>       | Ash   | <i>Ladona fulva</i>      |
| LFUL015175 | <i>Set1</i>        | Trx   | <i>Ladona fulva</i>      |
| LFUL000349 | <i>Set2</i>        | Ash   | <i>Ladona fulva</i>      |
| LFUL016302 | <i>Set8</i>        | -     | <i>Ladona fulva</i>      |
| LFUL004830 | <i>setd</i>        | SETD  | <i>Ladona fulva</i>      |
| LFUL004829 | <i>setd</i>        | SETD  | <i>Ladona fulva</i>      |



|            |                    |       |                             |
|------------|--------------------|-------|-----------------------------|
| LFUL017126 | <i>Smyd4-2</i>     | SMYD  | <i>Ladona fulva</i>         |
| LFUL005942 | <i>Smyd4-3</i>     | SMYD  | <i>Ladona fulva</i>         |
| LFUL003129 | <i>Smyd5</i>       | SMYD  | <i>Ladona fulva</i>         |
| LFUL012204 | <i>SmydA-1</i>     | SmydA | <i>Ladona fulva</i>         |
| LFUL010707 | <i>SmydA-2</i>     | SmydA | <i>Ladona fulva</i>         |
| LFUL017916 | <i>SmydA-4</i>     | SmydA | <i>Ladona fulva</i>         |
| LFUL012672 | <i>SmydA-4</i>     | SmydA | <i>Ladona fulva</i>         |
| LFUL010708 | <i>SmydA-5</i>     | SmydA | <i>Ladona fulva</i>         |
| LFUL013113 | <i>suv</i>         | Suv   | <i>Ladona fulva</i>         |
| LFUL012798 | <i>trr</i>         | Trx   | <i>Ladona fulva</i>         |
| LFUL001593 | <i>trx</i>         | Trx   | <i>Ladona fulva</i>         |
| LFUL007711 | <i>upSET(MLL5)</i> | -     | <i>Ladona fulva</i>         |
| Lalb_02950 | <i>ash1</i>        | Ash   | <i>Lasioglossum albipes</i> |
| Lalb_08394 | <i>Blimp-1</i>     | PRDM  | <i>Lasioglossum albipes</i> |
| Lalb_06607 | <i>egg</i>         | Suv   | <i>Lasioglossum albipes</i> |
| Lalb_11002 | <i>Ez</i>          | Ez    | <i>Lasioglossum albipes</i> |
| Lalb_10338 | <i>G9a</i>         | Suv   | <i>Lasioglossum albipes</i> |
| Lalb_12269 | <i>Hmt4-20</i>     | -     | <i>Lasioglossum albipes</i> |
| Lalb_07870 | <i>Mes-4</i>       | Ash   | <i>Lasioglossum albipes</i> |
| Lalb_10938 | <i>Set1</i>        | Trx   | <i>Lasioglossum albipes</i> |
| Lalb_03409 | <i>Set2</i>        | Ash   | <i>Lasioglossum albipes</i> |
| Lalb_03480 | <i>Set8</i>        | -     | <i>Lasioglossum albipes</i> |
| Lalb_08206 | <i>setd</i>        | SETD  | <i>Lasioglossum albipes</i> |
| Lalb_03770 | <i>Smyd4-1</i>     | SMYD  | <i>Lasioglossum albipes</i> |
| Lalb_06589 | <i>Smyd4-2</i>     | SMYD  | <i>Lasioglossum albipes</i> |
| Lalb_08174 | <i>Smyd4-2</i>     | SMYD  | <i>Lasioglossum albipes</i> |
| Lalb_11136 | <i>Smyd4-2</i>     | SMYD  | <i>Lasioglossum albipes</i> |
| Lalb_10295 | <i>Smyd4-3</i>     | SMYD  | <i>Lasioglossum albipes</i> |
| Lalb_13863 | <i>Smyd4-3</i>     | SMYD  | <i>Lasioglossum albipes</i> |
| Lalb_10247 | <i>Smyd4-4</i>     | SMYD  | <i>Lasioglossum albipes</i> |
| Lalb_03197 | <i>Smyd4-4</i>     | SMYD  | <i>Lasioglossum albipes</i> |
| Lalb_10800 | <i>Smyd5</i>       | SMYD  | <i>Lasioglossum albipes</i> |
| Lalb_11488 | <i>SmydA-1</i>     | SmydA | <i>Lasioglossum albipes</i> |
| Lalb_00738 | <i>SmydA-3</i>     | SmydA | <i>Lasioglossum albipes</i> |
| Lalb_00739 | <i>SmydA-4</i>     | SmydA | <i>Lasioglossum albipes</i> |
| Lalb_03057 | <i>SmydA-5</i>     | SmydA | <i>Lasioglossum albipes</i> |
| Lalb_06677 | <i>SmydA-8</i>     | SmydA | <i>Lasioglossum albipes</i> |
| Lalb_06260 | <i>suv</i>         | Suv   | <i>Lasioglossum albipes</i> |
| Lalb_11951 | <i>trr</i>         | Trx   | <i>Lasioglossum albipes</i> |
| Lalb_07949 | <i>trx</i>         | Trx   | <i>Lasioglossum albipes</i> |
| Lalb_00628 | <i>upSET(MLL5)</i> | -     | <i>Lasioglossum albipes</i> |
| LHES001197 | <i>Blimp-1</i>     | PRDM  | <i>Latrodectus hesperus</i> |
| LHES003642 | <i>Blimp-1</i>     | PRDM  | <i>Latrodectus hesperus</i> |
| LHES003277 | <i>egg</i>         | Suv   | <i>Latrodectus hesperus</i> |

|            |                   |       |                                  |
|------------|-------------------|-------|----------------------------------|
| LHES001690 | <i>Ez</i>         | Ez    | <i>Latrodectus hesperus</i>      |
| LHES004109 | <i>G9a</i>        | Suv   | <i>Latrodectus hesperus</i>      |
| LHES000806 | <i>Hmt4-20</i>    | -     | <i>Latrodectus hesperus</i>      |
| LHES001458 | <i>Hmt4-20</i>    | -     | <i>Latrodectus hesperus</i>      |
| LHES011056 | <i>Mes-4</i>      | Ash   | <i>Latrodectus hesperus</i>      |
| LHES001912 | <i>Mes-4</i>      | Ash   | <i>Latrodectus hesperus</i>      |
| LHES003432 | <i>Set1</i>       | Trx   | <i>Latrodectus hesperus</i>      |
| LHES006360 | <i>Set2</i>       | Ash   | <i>Latrodectus hesperus</i>      |
| LHES006058 | <i>Set8</i>       | -     | <i>Latrodectus hesperus</i>      |
| LHES011089 | <i>setd</i>       | SETD  | <i>Latrodectus hesperus</i>      |
| LHES005367 | <i>Smyd5</i>      | SMYD  | <i>Latrodectus hesperus</i>      |
| LHES002320 | <i>Su(var)3-9</i> | Suv   | <i>Latrodectus hesperus</i>      |
| LHES014148 | <i>suv</i>        | Suv   | <i>Latrodectus hesperus</i>      |
| LHES010899 | <i>trr</i>        | Trx   | <i>Latrodectus hesperus</i>      |
| LHES007730 | <i>trx</i>        | Trx   | <i>Latrodectus hesperus</i>      |
| LDEC014806 | -                 | -     | <i>Leptinotarsa decemlineata</i> |
| LDEC016729 | <i>ash1</i>       | Ash   | <i>Leptinotarsa decemlineata</i> |
| LDEC016433 | <i>Blimp-1</i>    | PRDM  | <i>Leptinotarsa decemlineata</i> |
| LDEC019415 | <i>egg</i>        | Suv   | <i>Leptinotarsa decemlineata</i> |
| LDEC019416 | <i>egg</i>        | Suv   | <i>Leptinotarsa decemlineata</i> |
| LDEC016953 | <i>Ez</i>         | Ez    | <i>Leptinotarsa decemlineata</i> |
| LDEC018674 | <i>G9a</i>        | Suv   | <i>Leptinotarsa decemlineata</i> |
| LDEC000081 | <i>Hmt4-20</i>    | -     | <i>Leptinotarsa decemlineata</i> |
| LDEC003201 | <i>Set1</i>       | Trx   | <i>Leptinotarsa decemlineata</i> |
| LDEC014818 | <i>Set2</i>       | Ash   | <i>Leptinotarsa decemlineata</i> |
| LDEC002537 | <i>Set8</i>       | -     | <i>Leptinotarsa decemlineata</i> |
| LDEC006090 | <i>setd</i>       | SETD  | <i>Leptinotarsa decemlineata</i> |
| LDEC003561 | <i>Smyd3</i>      | SMYD  | <i>Leptinotarsa decemlineata</i> |
| LDEC011103 | <i>Smyd4-1</i>    | SMYD  | <i>Leptinotarsa decemlineata</i> |
| LDEC001055 | <i>Smyd4-3</i>    | SMYD  | <i>Leptinotarsa decemlineata</i> |
| LDEC003781 | <i>Smyd4-3</i>    | SMYD  | <i>Leptinotarsa decemlineata</i> |
| LDEC004316 | <i>Smyd4-3</i>    | SMYD  | <i>Leptinotarsa decemlineata</i> |
| LDEC011170 | <i>Smyd4-3</i>    | SMYD  | <i>Leptinotarsa decemlineata</i> |
| LDEC015452 | <i>Smyd4-3</i>    | SMYD  | <i>Leptinotarsa decemlineata</i> |
| LDEC018848 | <i>Smyd4-4</i>    | SMYD  | <i>Leptinotarsa decemlineata</i> |
| LDEC018236 | <i>Smyd4-4</i>    | SMYD  | <i>Leptinotarsa decemlineata</i> |
| LDEC014032 | <i>Smyd5</i>      | SMYD  | <i>Leptinotarsa decemlineata</i> |
| LDEC023571 | <i>SmydA-1</i>    | SmydA | <i>Leptinotarsa decemlineata</i> |
| LDEC004931 | <i>SmydA-3</i>    | SmydA | <i>Leptinotarsa decemlineata</i> |
| LDEC015232 | <i>SmydA-4</i>    | SmydA | <i>Leptinotarsa decemlineata</i> |
| LDEC009677 | <i>SmydA-5</i>    | SmydA | <i>Leptinotarsa decemlineata</i> |
| LDEC012304 | <i>SmydA-6</i>    | SmydA | <i>Leptinotarsa decemlineata</i> |
| LDEC001146 | <i>SmydA-8</i>    | SmydA | <i>Leptinotarsa decemlineata</i> |
| LDEC013064 | <i>Su(var)3-9</i> | Suv   | <i>Leptinotarsa decemlineata</i> |

|              |                    |       |                                  |
|--------------|--------------------|-------|----------------------------------|
| LDEC007312   | <i>suv</i>         | Suv   | <i>Leptinotarsa decemlineata</i> |
| LDEC013318   | <i>trr</i>         | Trx   | <i>Leptinotarsa decemlineata</i> |
| LDEC011089   | <i>trx</i>         | Trx   | <i>Leptinotarsa decemlineata</i> |
| lac992.17    | <i>ash1</i>        | Ash   | <i>Lerema accius</i>             |
| lac899.18    | <i>Blimp-1</i>     | PRDM  | <i>Lerema accius</i>             |
| lac346.12    | <i>Blimp-1</i>     | PRDM  | <i>Lerema accius</i>             |
| lac54.25     | <i>egg</i>         | Suv   | <i>Lerema accius</i>             |
| lac157.11    | <i>Ez</i>          | Ez    | <i>Lerema accius</i>             |
| lac615.13    | <i>G9a</i>         | Suv   | <i>Lerema accius</i>             |
| lac161926.6  | <i>Hmt4-20</i>     | -     | <i>Lerema accius</i>             |
| lac7082.4    | <i>Mes-4</i>       | Ash   | <i>Lerema accius</i>             |
| lac1066.30   | <i>Set1</i>        | Trx   | <i>Lerema accius</i>             |
| lac393.2     | <i>Set2</i>        | Ash   | <i>Lerema accius</i>             |
| lac677.30    | <i>Set8</i>        | -     | <i>Lerema accius</i>             |
| lac251.21    | <i>setd</i>        | SETD  | <i>Lerema accius</i>             |
| lac203.8     | <i>Smyd3</i>       | SMYD  | <i>Lerema accius</i>             |
| lac2058.2    | <i>Smyd4-3</i>     | SMYD  | <i>Lerema accius</i>             |
| lac160671.79 | <i>Smyd4-4</i>     | SMYD  | <i>Lerema accius</i>             |
| lac930.2     | <i>Smyd5</i>       | SMYD  | <i>Lerema accius</i>             |
| lac2099.9    | <i>SmydA-1</i>     | SmydA | <i>Lerema accius</i>             |
| lac380.5     | <i>SmydA-2</i>     | SmydA | <i>Lerema accius</i>             |
| lac2099.8    | <i>SmydA-4</i>     | SmydA | <i>Lerema accius</i>             |
| lac380.4     | <i>SmydA-5</i>     | SmydA | <i>Lerema accius</i>             |
| lac380.31    | <i>SmydA-6</i>     | SmydA | <i>Lerema accius</i>             |
| lac289.26    | <i>SmydA-8</i>     | SmydA | <i>Lerema accius</i>             |
| lac289.25    | <i>SmydA-8</i>     | SmydA | <i>Lerema accius</i>             |
| lac751.34    | <i>Su(var)3-9</i>  | Suv   | <i>Lerema accius</i>             |
| lac90767.1   | <i>trr</i>         | Trx   | <i>Lerema accius</i>             |
| lac34.38     | <i>trx</i>         | Trx   | <i>Lerema accius</i>             |
| lac643.37    | <i>upSET(MLL5)</i> | -     | <i>Lerema accius</i>             |
| LLUN005950   | <i>egg</i>         | Suv   | <i>Limnephilus lunatus</i>       |
| LLUN005250   | <i>Ez</i>          | Ez    | <i>Limnephilus lunatus</i>       |
| LLUN012587   | <i>G9a</i>         | Suv   | <i>Limnephilus lunatus</i>       |
| LLUN003118   | <i>Hmt4-20</i>     | -     | <i>Limnephilus lunatus</i>       |
| LLUN009442   | <i>Set1</i>        | Trx   | <i>Limnephilus lunatus</i>       |
| LLUN006029   | <i>Set8</i>        | -     | <i>Limnephilus lunatus</i>       |
| LLUN012732   | <i>setd</i>        | SETD  | <i>Limnephilus lunatus</i>       |
| LLUN011247   | <i>Smyd4-2</i>     | SMYD  | <i>Limnephilus lunatus</i>       |
| LLUN006391   | <i>Smyd4-4</i>     | SMYD  | <i>Limnephilus lunatus</i>       |
| LLUN002435   | <i>Smyd5</i>       | SMYD  | <i>Limnephilus lunatus</i>       |
| LLUN007945   | <i>SmydA-2</i>     | SmydA | <i>Limnephilus lunatus</i>       |
| LLUN003965   | <i>SmydA-4</i>     | SmydA | <i>Limnephilus lunatus</i>       |
| LLUN002737   | <i>SmydA-4</i>     | SmydA | <i>Limnephilus lunatus</i>       |
| LLUN012350   | <i>Su(var)3-9</i>  | Suv   | <i>Limnephilus lunatus</i>       |

|                |                    |      |                            |
|----------------|--------------------|------|----------------------------|
| LLUN008584     | <i>trr</i>         | Trx  | <i>Limnephilus lunatus</i> |
| LLUN012029     | <i>upSET(MLL5)</i> | -    | <i>Limnephilus lunatus</i> |
| XP_013774094.1 | -                  | -    | <i>Limulus polyphemus</i>  |
| XP_013779563.1 | <i>ash1</i>        | Ash  | <i>Limulus polyphemus</i>  |
| XP_013780438.1 | <i>Blimp-1</i>     | PRDM | <i>Limulus polyphemus</i>  |
| XP_013782728.1 | <i>Blimp-1</i>     | PRDM | <i>Limulus polyphemus</i>  |
| XP_013791986.1 | <i>Blimp-1</i>     | PRDM | <i>Limulus polyphemus</i>  |
| XP_013794286.1 | <i>Blimp-1</i>     | PRDM | <i>Limulus polyphemus</i>  |
| XP_013774016.1 | <i>egg</i>         | Suv  | <i>Limulus polyphemus</i>  |
| XP_013777692.1 | <i>Ez</i>          | Ez   | <i>Limulus polyphemus</i>  |
| XP_013777216.1 | <i>Ez</i>          | Ez   | <i>Limulus polyphemus</i>  |
| XP_013793296.1 | <i>G9a</i>         | Suv  | <i>Limulus polyphemus</i>  |
| XP_013792649.1 | <i>G9a</i>         | Suv  | <i>Limulus polyphemus</i>  |
| XP_013780359.1 | <i>Hmt4-20</i>     | -    | <i>Limulus polyphemus</i>  |
| XP_013777413.1 | <i>Hmt4-20</i>     | -    | <i>Limulus polyphemus</i>  |
| XP_013784275.1 | <i>Mes-4</i>       | Ash  | <i>Limulus polyphemus</i>  |
| XP_013775697.1 | <i>Mes-4</i>       | Ash  | <i>Limulus polyphemus</i>  |
| XP_013780692.1 | <i>Set1</i>        | Trx  | <i>Limulus polyphemus</i>  |
| XP_013773324.1 | <i>Set2</i>        | Ash  | <i>Limulus polyphemus</i>  |
| XP_013788393.1 | <i>Set8</i>        | -    | <i>Limulus polyphemus</i>  |
| XP_013782031.1 | <i>setd</i>        | SETD | <i>Limulus polyphemus</i>  |
| XP_013777393.1 | <i>Smyd4-3</i>     | SMYD | <i>Limulus polyphemus</i>  |
| XP_013788365.1 | <i>Smyd5</i>       | SMYD | <i>Limulus polyphemus</i>  |
| XP_013772199.1 | <i>Su(var)3-9</i>  | Suv  | <i>Limulus polyphemus</i>  |
| XP_013782805.1 | <i>suv</i>         | Suv  | <i>Limulus polyphemus</i>  |
| XP_013784687.1 | <i>trr</i>         | Trx  | <i>Limulus polyphemus</i>  |
| XP_013779655.1 | <i>trr</i>         | Trx  | <i>Limulus polyphemus</i>  |
| XP_013772143.1 | <i>trx</i>         | Trx  | <i>Limulus polyphemus</i>  |
| XP_013792816.1 | <i>upSET(MLL5)</i> | -    | <i>Limulus polyphemus</i>  |
| XP_013791181.1 | <i>upSET(MLL5)</i> | -    | <i>Limulus polyphemus</i>  |
| LH22354        | -                  | -    | <i>Linepithema humile</i>  |
| LH15972        | <i>ash1</i>        | Ash  | <i>Linepithema humile</i>  |
| LH13683        | <i>Blimp-1</i>     | PRDM | <i>Linepithema humile</i>  |
| LH15981        | <i>egg</i>         | Suv  | <i>Linepithema humile</i>  |
| LH16500        | <i>Ez</i>          | Ez   | <i>Linepithema humile</i>  |
| LH21466        | <i>G9a</i>         | Suv  | <i>Linepithema humile</i>  |
| LH18409        | <i>Hmt4-20</i>     | -    | <i>Linepithema humile</i>  |
| LH12300        | <i>Mes-4</i>       | Ash  | <i>Linepithema humile</i>  |
| LH17913        | <i>Set1</i>        | Trx  | <i>Linepithema humile</i>  |
| LH24846        | <i>Set2</i>        | Ash  | <i>Linepithema humile</i>  |
| LH18657        | <i>Set8</i>        | -    | <i>Linepithema humile</i>  |
| LH19541        | <i>setd</i>        | SETD | <i>Linepithema humile</i>  |
| LH19539        | <i>setd</i>        | SETD | <i>Linepithema humile</i>  |
| LH15882        | <i>Smyd4-2</i>     | SMYD | <i>Linepithema humile</i>  |

|               |                    |       |                           |
|---------------|--------------------|-------|---------------------------|
| LH18872       | <i>Smyd4-3</i>     | SMYD  | <i>Linepithema humile</i> |
| LH16275       | <i>Smyd4-3</i>     | SMYD  | <i>Linepithema humile</i> |
| LH24578       | <i>Smyd4-3</i>     | SMYD  | <i>Linepithema humile</i> |
| LH24608       | <i>Smyd4-3</i>     | SMYD  | <i>Linepithema humile</i> |
| LH15269       | <i>Smyd4-4</i>     | SMYD  | <i>Linepithema humile</i> |
| LH12468       | <i>Smyd5</i>       | SMYD  | <i>Linepithema humile</i> |
| LH25024       | <i>SmydA-3</i>     | SmydA | <i>Linepithema humile</i> |
| LH25025       | <i>SmydA-4</i>     | SmydA | <i>Linepithema humile</i> |
| LH16369       | <i>SmydA-5</i>     | SmydA | <i>Linepithema humile</i> |
| LH21230       | <i>SmydA-8</i>     | SmydA | <i>Linepithema humile</i> |
| LH17627       | <i>Su(var)3-9</i>  | Suv   | <i>Linepithema humile</i> |
| LH14306       | <i>suv</i>         | Suv   | <i>Linepithema humile</i> |
| LH18978       | <i>trr</i>         | Trx   | <i>Linepithema humile</i> |
| LH13352       | <i>trx</i>         | Trx   | <i>Linepithema humile</i> |
| LH15211       | <i>upSET(MLL5)</i> | -     | <i>Linepithema humile</i> |
| LOCMi00787    | -                  | -     | <i>Locusta miratoria</i>  |
| LOCMi09053    | <i>ash1</i>        | Ash   | <i>Locusta miratoria</i>  |
| LOCMi03971    | <i>Blimp-1</i>     | PRDM  | <i>Locusta miratoria</i>  |
| LOCMi07997    | <i>egg</i>         | Suv   | <i>Locusta miratoria</i>  |
| LOCMi08045    | <i>Ez</i>          | Ez    | <i>Locusta miratoria</i>  |
| LOCMi03117    | <i>G9a</i>         | Suv   | <i>Locusta miratoria</i>  |
| LOCMi10213    | <i>Hmt4-20</i>     | -     | <i>Locusta miratoria</i>  |
| locmi_mes_4   | <i>Mes-4</i>       | Ash   | <i>Locusta miratoria</i>  |
| LOCMi05868    | <i>Set1</i>        | Trx   | <i>Locusta miratoria</i>  |
| LOCMi16575    | <i>Set2</i>        | Ash   | <i>Locusta miratoria</i>  |
| LOCMi08077    | <i>Set8</i>        | -     | <i>Locusta miratoria</i>  |
| LOCMi03802    | <i>setd</i>        | SETD  | <i>Locusta miratoria</i>  |
| LOCMi09401    | <i>Smyd3</i>       | SMYD  | <i>Locusta miratoria</i>  |
| LOCMi09977    | <i>Smyd4-1</i>     | SMYD  | <i>Locusta miratoria</i>  |
| LOCMi09668    | <i>Smyd4-3</i>     | SMYD  | <i>Locusta miratoria</i>  |
| LOCMi08571    | <i>Smyd4-3</i>     | SMYD  | <i>Locusta miratoria</i>  |
| LOCMi03856    | <i>Smyd4-4</i>     | SMYD  | <i>Locusta miratoria</i>  |
| LOCMi01890    | <i>Smyd5</i>       | SMYD  | <i>Locusta miratoria</i>  |
| LOCMi00956    | <i>SmydA-1</i>     | SmydA | <i>Locusta miratoria</i>  |
| locmi_smydA_2 | <i>SmydA-2</i>     | SmydA | <i>Locusta miratoria</i>  |
| LOCMi13222    | <i>SmydA-4</i>     | SmydA | <i>Locusta miratoria</i>  |
| LOCMi04115    | <i>SmydA-5</i>     | SmydA | <i>Locusta miratoria</i>  |
| LOCMi02722    | <i>SmydA-6</i>     | SmydA | <i>Locusta miratoria</i>  |
| LOCMi13608    | <i>SmydA-8</i>     | SmydA | <i>Locusta miratoria</i>  |
| locmi_suv     | <i>Su(var)3-9</i>  | Suv   | <i>Locusta miratoria</i>  |
| LOCMi02447    | <i>suv</i>         | Suv   | <i>Locusta miratoria</i>  |
| LOCMi06593    | <i>trr</i>         | Trx   | <i>Locusta miratoria</i>  |
| LOCMi08240    | <i>trx</i>         | Trx   | <i>Locusta miratoria</i>  |
| LOCMi04755    | <i>upSET(MLL5)</i> | -     | <i>Locusta miratoria</i>  |

|            |                    |       |                              |
|------------|--------------------|-------|------------------------------|
| LREC013115 | -                  | -     | <i>Loxosceles reclusa</i>    |
| LREC012179 | <i>Blimp-1</i>     | PRDM  | <i>Loxosceles reclusa</i>    |
| LREC005103 | <i>Mes-4</i>       | Ash   | <i>Loxosceles reclusa</i>    |
| LREC018244 | <i>Mes-4</i>       | Ash   | <i>Loxosceles reclusa</i>    |
| LREC012138 | <i>Set2</i>        | Ash   | <i>Loxosceles reclusa</i>    |
| LREC002897 | <i>Set2</i>        | Ash   | <i>Loxosceles reclusa</i>    |
| LREC020476 | <i>Set8</i>        | -     | <i>Loxosceles reclusa</i>    |
| LREC020590 | <i>Su(var)3-9</i>  | Suv   | <i>Loxosceles reclusa</i>    |
| LREC001799 | <i>trx</i>         | Trx   | <i>Loxosceles reclusa</i>    |
| LCUP000283 | -                  | -     | <i>Lucilia cuprina</i>       |
| LCUP018392 | <i>ash1</i>        | Ash   | <i>Lucilia cuprina</i>       |
| LCUP008191 | <i>Blimp-1</i>     | PRDM  | <i>Lucilia cuprina</i>       |
| LCUP015817 | <i>egg</i>         | Suv   | <i>Lucilia cuprina</i>       |
| LCUP005952 | <i>Ez</i>          | Ez    | <i>Lucilia cuprina</i>       |
| LCUP011706 | <i>G9a</i>         | Suv   | <i>Lucilia cuprina</i>       |
| LCUP009707 | <i>Hmt4-20</i>     | -     | <i>Lucilia cuprina</i>       |
| LCUP000697 | <i>Mes-4</i>       | Ash   | <i>Lucilia cuprina</i>       |
| LCUP011687 | <i>Set1</i>        | Trx   | <i>Lucilia cuprina</i>       |
| LCUP013762 | <i>Set2</i>        | Ash   | <i>Lucilia cuprina</i>       |
| LCUP000915 | <i>Set8</i>        | -     | <i>Lucilia cuprina</i>       |
| LCUP004880 | <i>setd</i>        | SETD  | <i>Lucilia cuprina</i>       |
| LCUP001038 | <i>Smyd4-1</i>     | SMYD  | <i>Lucilia cuprina</i>       |
| LCUP007217 | <i>Smyd4-2</i>     | SMYD  | <i>Lucilia cuprina</i>       |
| LCUP012337 | <i>Smyd4-3</i>     | SMYD  | <i>Lucilia cuprina</i>       |
| LCUP010325 | <i>Smyd4-4</i>     | SMYD  | <i>Lucilia cuprina</i>       |
| LCUP002371 | <i>Smyd5</i>       | SMYD  | <i>Lucilia cuprina</i>       |
| LCUP008487 | <i>SmydA-1</i>     | SmydA | <i>Lucilia cuprina</i>       |
| LCUP001566 | <i>SmydA-2</i>     | SmydA | <i>Lucilia cuprina</i>       |
| LCUP002115 | <i>SmydA-3</i>     | SmydA | <i>Lucilia cuprina</i>       |
| LCUP004708 | <i>SmydA-4</i>     | SmydA | <i>Lucilia cuprina</i>       |
| LCUP007602 | <i>SmydA-5</i>     | SmydA | <i>Lucilia cuprina</i>       |
| LCUP002665 | <i>SmydA-8</i>     | SmydA | <i>Lucilia cuprina</i>       |
| LCUP002666 | <i>SmydA-8</i>     | SmydA | <i>Lucilia cuprina</i>       |
| LCUP002667 | <i>SmydA-9</i>     | SmydA | <i>Lucilia cuprina</i>       |
| LCUP000300 | <i>suv</i>         | Suv   | <i>Lucilia cuprina</i>       |
| LCUP001960 | <i>trr</i>         | Trx   | <i>Lucilia cuprina</i>       |
| LCUP010760 | <i>trx</i>         | Trx   | <i>Lucilia cuprina</i>       |
| LCUP018340 | <i>upSET(MLL5)</i> | -     | <i>Lucilia cuprina</i>       |
| LLOJ001507 | -                  | -     | <i>Lutzomyia longipalpis</i> |
| LLOJ006340 | -                  | -     | <i>Lutzomyia longipalpis</i> |
| LLOJ009331 | -                  | -     | <i>Lutzomyia longipalpis</i> |
| LLOJ004268 | <i>Blimp-1</i>     | PRDM  | <i>Lutzomyia longipalpis</i> |
| LLOJ009396 | <i>egg</i>         | Suv   | <i>Lutzomyia longipalpis</i> |
| LLOJ006291 | <i>Ez</i>          | Ez    | <i>Lutzomyia longipalpis</i> |

|                |                    |       |                              |
|----------------|--------------------|-------|------------------------------|
| LLOJ002505     | <i>G9a</i>         | Suv   | <i>Lutzomyia longipalpis</i> |
| LLOJ001900     | <i>Hmt4-20</i>     | -     | <i>Lutzomyia longipalpis</i> |
| LLOJ007114     | <i>Mes-4</i>       | Ash   | <i>Lutzomyia longipalpis</i> |
| LLOJ007115     | <i>Mes-4</i>       | Ash   | <i>Lutzomyia longipalpis</i> |
| LLOJ004596     | <i>Set2</i>        | Ash   | <i>Lutzomyia longipalpis</i> |
| LLOJ002416     | <i>setd</i>        | SETD  | <i>Lutzomyia longipalpis</i> |
| LLOJ007749     | <i>Smyd4-3</i>     | SMYD  | <i>Lutzomyia longipalpis</i> |
| LLOJ005009     | <i>Smyd4-4</i>     | SMYD  | <i>Lutzomyia longipalpis</i> |
| LLOJ005920     | <i>Smyd4-4</i>     | SMYD  | <i>Lutzomyia longipalpis</i> |
| LLOJ005921     | <i>Smyd4-4</i>     | SMYD  | <i>Lutzomyia longipalpis</i> |
| LLOJ009604     | <i>Smyd4-4</i>     | SMYD  | <i>Lutzomyia longipalpis</i> |
| LLOJ004165     | <i>Smyd5</i>       | SMYD  | <i>Lutzomyia longipalpis</i> |
| LLOJ003243     | <i>SmydA-1</i>     | SmydA | <i>Lutzomyia longipalpis</i> |
| LLOJ002820     | <i>SmydA-2</i>     | SmydA | <i>Lutzomyia longipalpis</i> |
| LLOJ008798     | <i>SmydA-3</i>     | SmydA | <i>Lutzomyia longipalpis</i> |
| LLOJ000942     | <i>SmydA-4</i>     | SmydA | <i>Lutzomyia longipalpis</i> |
| LLOJ007771     | <i>SmydA-8</i>     | SmydA | <i>Lutzomyia longipalpis</i> |
| LLOJ000788     | <i>Su(var)3-9</i>  | Suv   | <i>Lutzomyia longipalpis</i> |
| LLOJ000371     | <i>trr</i>         | Trx   | <i>Lutzomyia longipalpis</i> |
| LLOJ006848     | <i>trx</i>         | Trx   | <i>Lutzomyia longipalpis</i> |
| LLOJ007512     | <i>upSET(MLL5)</i> | -     | <i>Lutzomyia longipalpis</i> |
| Msex2.11575-RA | <i>ash1</i>        | Ash   | <i>Manduca sexta</i>         |
| Msex2.11575-RB | <i>ash1</i>        | Ash   | <i>Manduca sexta</i>         |
| Msex2.11575-RC | <i>ash1</i>        | Ash   | <i>Manduca sexta</i>         |
| Msex2.11575-RD | <i>ash1</i>        | Ash   | <i>Manduca sexta</i>         |
| Msex2.11575-RE | <i>ash1</i>        | Ash   | <i>Manduca sexta</i>         |
| Msex2.06346-RA | <i>Blimp-1</i>     | PRDM  | <i>Manduca sexta</i>         |
| Msex2.06346-RB | <i>Blimp-1</i>     | PRDM  | <i>Manduca sexta</i>         |
| Msex2.06346-RC | <i>Blimp-1</i>     | PRDM  | <i>Manduca sexta</i>         |
| Msex2.06346-RD | <i>Blimp-1</i>     | PRDM  | <i>Manduca sexta</i>         |
| Msex2.06346-RE | <i>Blimp-1</i>     | PRDM  | <i>Manduca sexta</i>         |
| Msex2.06346-RF | <i>Blimp-1</i>     | PRDM  | <i>Manduca sexta</i>         |
| Msex2.10962-RA | <i>Blimp-1</i>     | PRDM  | <i>Manduca sexta</i>         |
| Msex2.10437-RA | <i>egg</i>         | Suv   | <i>Manduca sexta</i>         |
| Msex2.12341-RA | <i>Ez</i>          | Ez    | <i>Manduca sexta</i>         |
| Msex2.12341-RB | <i>Ez</i>          | Ez    | <i>Manduca sexta</i>         |
| Msex2.10252-RC | <i>G9a</i>         | Suv   | <i>Manduca sexta</i>         |
| Msex2.10252-RA | <i>G9a</i>         | Suv   | <i>Manduca sexta</i>         |
| Msex2.10252-RB | <i>G9a</i>         | Suv   | <i>Manduca sexta</i>         |
| Msex2.06794-RA | <i>Hmt4-20</i>     | -     | <i>Manduca sexta</i>         |
| Msex2.06794-RB | <i>Hmt4-20</i>     | -     | <i>Manduca sexta</i>         |
| Msex2.03620-RA | <i>Set1</i>        | Trx   | <i>Manduca sexta</i>         |
| Msex2.03620-RB | <i>Set1</i>        | Trx   | <i>Manduca sexta</i>         |
| Msex2.05433-RA | <i>Set2</i>        | Ash   | <i>Manduca sexta</i>         |

|                |                    |       |                             |
|----------------|--------------------|-------|-----------------------------|
| Msex2.05433-RB | <i>Set2</i>        | Ash   | <i>Manduca sexta</i>        |
| Msex2.03628-RA | <i>Set8</i>        | -     | <i>Manduca sexta</i>        |
| Msex2.05202-RA | <i>setd</i>        | SETD  | <i>Manduca sexta</i>        |
| Msex2.11948-RA | <i>setd</i>        | SETD  | <i>Manduca sexta</i>        |
| Msex2.14358-RA | <i>Smyd4-3</i>     | SMYD  | <i>Manduca sexta</i>        |
| Msex2.03698-RA | <i>Smyd4-3</i>     | SMYD  | <i>Manduca sexta</i>        |
| Msex2.07730-RA | <i>Smyd4-4</i>     | SMYD  | <i>Manduca sexta</i>        |
| Msex2.03357-RA | <i>Smyd4-4</i>     | SMYD  | <i>Manduca sexta</i>        |
| Msex2.03357-RB | <i>Smyd4-4</i>     | SMYD  | <i>Manduca sexta</i>        |
| Msex2.07382-RA | <i>Smyd5</i>       | SMYD  | <i>Manduca sexta</i>        |
| Msex2.03393-RA | <i>SmydA-1</i>     | SmydA | <i>Manduca sexta</i>        |
| Msex2.06019-RB | <i>SmydA-2</i>     | SmydA | <i>Manduca sexta</i>        |
| Msex2.06019-RA | <i>SmydA-2</i>     | SmydA | <i>Manduca sexta</i>        |
| Msex2.06043-RA | <i>SmydA-3</i>     | SmydA | <i>Manduca sexta</i>        |
| Msex2.03394-RC | <i>SmydA-4</i>     | SmydA | <i>Manduca sexta</i>        |
| Msex2.03394-RA | <i>SmydA-4</i>     | SmydA | <i>Manduca sexta</i>        |
| Msex2.03394-RB | <i>SmydA-4</i>     | SmydA | <i>Manduca sexta</i>        |
| Msex2.03394-RD | <i>SmydA-4</i>     | SmydA | <i>Manduca sexta</i>        |
| Msex2.05529-RB | <i>SmydA-5</i>     | SmydA | <i>Manduca sexta</i>        |
| Msex2.05529-RA | <i>SmydA-5</i>     | SmydA | <i>Manduca sexta</i>        |
| Msex2.06047-RA | <i>SmydA-6</i>     | SmydA | <i>Manduca sexta</i>        |
| Msex2.09238-RA | <i>SmydA-8</i>     | SmydA | <i>Manduca sexta</i>        |
| Msex2.09239-RA | <i>SmydA-8</i>     | SmydA | <i>Manduca sexta</i>        |
| Msex2.07042-RA | <i>suv</i>         | Suv   | <i>Manduca sexta</i>        |
| Msex2.08650-RA | <i>trr</i>         | Trx   | <i>Manduca sexta</i>        |
| Msex2.08650-RB | <i>trr</i>         | Trx   | <i>Manduca sexta</i>        |
| Msex2.08650-RC | <i>trr</i>         | Trx   | <i>Manduca sexta</i>        |
| Msex2.11099-RA | <i>upSET(MLL5)</i> | -     | <i>Manduca sexta</i>        |
| Msex2.11099-RB | <i>upSET(MLL5)</i> | -     | <i>Manduca sexta</i>        |
| Msex2.11099-RC | <i>upSET(MLL5)</i> | -     | <i>Manduca sexta</i>        |
| Msex2.11099-RD | <i>upSET(MLL5)</i> | -     | <i>Manduca sexta</i>        |
| Msex2.11099-RE | <i>upSET(MLL5)</i> | -     | <i>Manduca sexta</i>        |
| Msex2.11099-RF | <i>upSET(MLL5)</i> | -     | <i>Manduca sexta</i>        |
| Msex2.11099-RG | <i>upSET(MLL5)</i> | -     | <i>Manduca sexta</i>        |
| Msex2.11099-RH | <i>upSET(MLL5)</i> | -     | <i>Manduca sexta</i>        |
| Msex2.11099-RI | <i>upSET(MLL5)</i> | -     | <i>Manduca sexta</i>        |
| Msex2.11099-RJ | <i>upSET(MLL5)</i> | -     | <i>Manduca sexta</i>        |
| Msex2.11099-RK | <i>upSET(MLL5)</i> | -     | <i>Manduca sexta</i>        |
| Msex2.11099-RL | <i>upSET(MLL5)</i> | -     | <i>Manduca sexta</i>        |
| Msex2.11099-RM | <i>upSET(MLL5)</i> | -     | <i>Manduca sexta</i>        |
| MDES004780     | -                  | -     | <i>Mayetiola destructor</i> |
| MDES015892     | -                  | -     | <i>Mayetiola destructor</i> |
| MDES017515     | -                  | -     | <i>Mayetiola destructor</i> |
| MDES017724     | -                  | -     | <i>Mayetiola destructor</i> |



|            |                |      |                             |
|------------|----------------|------|-----------------------------|
| MDES018075 | -              | -    | <i>Mayetiola destructor</i> |
| MDES018152 | -              | -    | <i>Mayetiola destructor</i> |
| MDES018517 | -              | -    | <i>Mayetiola destructor</i> |
| MDES018884 | -              | -    | <i>Mayetiola destructor</i> |
| MDES019051 | -              | -    | <i>Mayetiola destructor</i> |
| MDES019196 | -              | -    | <i>Mayetiola destructor</i> |
| MDES019384 | -              | -    | <i>Mayetiola destructor</i> |
| MDES019442 | -              | -    | <i>Mayetiola destructor</i> |
| MDES019564 | -              | -    | <i>Mayetiola destructor</i> |
| MDES019629 | -              | -    | <i>Mayetiola destructor</i> |
| MDES019647 | -              | -    | <i>Mayetiola destructor</i> |
| MDES020064 | -              | -    | <i>Mayetiola destructor</i> |
| MDES005927 | -              | -    | <i>Mayetiola destructor</i> |
| MDES009322 | <i>ash1</i>    | Ash  | <i>Mayetiola destructor</i> |
| MDES013293 | <i>ash1</i>    | Ash  | <i>Mayetiola destructor</i> |
| MDES015171 | <i>ash1</i>    | Ash  | <i>Mayetiola destructor</i> |
| MDES019720 | <i>ash1</i>    | Ash  | <i>Mayetiola destructor</i> |
| MDES000762 | <i>Blimp-1</i> | PRDM | <i>Mayetiola destructor</i> |
| MDES004660 | <i>egg</i>     | Suv  | <i>Mayetiola destructor</i> |
| MDES010541 | <i>egg</i>     | Suv  | <i>Mayetiola destructor</i> |
| MDES013164 | <i>egg</i>     | Suv  | <i>Mayetiola destructor</i> |
| MDES010774 | <i>Ez</i>      | Ez   | <i>Mayetiola destructor</i> |
| MDES012126 | <i>G9a</i>     | Suv  | <i>Mayetiola destructor</i> |
| MDES003560 | <i>Hmt4-20</i> | -    | <i>Mayetiola destructor</i> |
| MDES006259 | <i>Mes-4</i>   | Ash  | <i>Mayetiola destructor</i> |
| MDES009331 | <i>Mes-4</i>   | Ash  | <i>Mayetiola destructor</i> |
| MDES019977 | <i>Mes-4</i>   | Ash  | <i>Mayetiola destructor</i> |
| MDES003857 | <i>Set1</i>    | Trx  | <i>Mayetiola destructor</i> |
| MDES005832 | <i>Set2</i>    | Ash  | <i>Mayetiola destructor</i> |
| MDES015000 | <i>Set2</i>    | Ash  | <i>Mayetiola destructor</i> |
| MDES008970 | <i>Set8</i>    | -    | <i>Mayetiola destructor</i> |
| MDES008973 | <i>Set8</i>    | -    | <i>Mayetiola destructor</i> |
| MDES012871 | <i>Smyd4-1</i> | SMYD | <i>Mayetiola destructor</i> |
| MDES012900 | <i>Smyd4-2</i> | SMYD | <i>Mayetiola destructor</i> |
| MDES010788 | <i>Smyd4-4</i> | SMYD | <i>Mayetiola destructor</i> |
| MDES009713 | <i>Smyd4-4</i> | SMYD | <i>Mayetiola destructor</i> |
| MDES010008 | <i>Smyd4-4</i> | SMYD | <i>Mayetiola destructor</i> |
| MDES017360 | <i>Smyd4-4</i> | SMYD | <i>Mayetiola destructor</i> |
| MDES017361 | <i>Smyd4-4</i> | SMYD | <i>Mayetiola destructor</i> |
| MDES017362 | <i>Smyd4-4</i> | SMYD | <i>Mayetiola destructor</i> |
| MDES017432 | <i>Smyd4-4</i> | SMYD | <i>Mayetiola destructor</i> |
| MDES017433 | <i>Smyd4-4</i> | SMYD | <i>Mayetiola destructor</i> |
| MDES017455 | <i>Smyd4-4</i> | SMYD | <i>Mayetiola destructor</i> |
| MDES017824 | <i>Smyd4-4</i> | SMYD | <i>Mayetiola destructor</i> |

|             |                    |       |                             |
|-------------|--------------------|-------|-----------------------------|
| MDES019529  | <i>Smyd5</i>       | SMYD  | <i>Mayetiola destructor</i> |
| MDES013492  | <i>SmydA-1</i>     | SmydA | <i>Mayetiola destructor</i> |
| MDES009703  | <i>SmydA-2</i>     | SmydA | <i>Mayetiola destructor</i> |
| MDES011038  | <i>SmydA-3</i>     | SmydA | <i>Mayetiola destructor</i> |
| MDES010088  | <i>SmydA-5</i>     | SmydA | <i>Mayetiola destructor</i> |
| MDES002338  | <i>Su(var)3-9</i>  | Suv   | <i>Mayetiola destructor</i> |
| MDES002499  | <i>suv</i>         | Suv   | <i>Mayetiola destructor</i> |
| MDES004136  | <i>trr</i>         | Trx   | <i>Mayetiola destructor</i> |
| MDES018256  | <i>trr</i>         | Trx   | <i>Mayetiola destructor</i> |
| MDES005703  | <i>trx</i>         | Trx   | <i>Mayetiola destructor</i> |
| MDES011632  | <i>upSET(MLL5)</i> | -     | <i>Mayetiola destructor</i> |
| Mrot04594   | <i>ash1</i>        | Ash   | <i>Megachile rotundata</i>  |
| Mrot00136   | <i>Blimp-1</i>     | PRDM  | <i>Megachile rotundata</i>  |
| Mrot01289   | <i>egg</i>         | Suv   | <i>Megachile rotundata</i>  |
| Mrot10765   | <i>Ez</i>          | Ez    | <i>Megachile rotundata</i>  |
| Mrot00982   | <i>G9a</i>         | Suv   | <i>Megachile rotundata</i>  |
| Mrot02943   | <i>Hmt4-20</i>     | -     | <i>Megachile rotundata</i>  |
| Mrot10786   | <i>Mes-4</i>       | Ash   | <i>Megachile rotundata</i>  |
| Mrot01457   | <i>Set1</i>        | Trx   | <i>Megachile rotundata</i>  |
| Mrot08140   | <i>Set2</i>        | Ash   | <i>Megachile rotundata</i>  |
| Mrot05350   | <i>Set8</i>        | -     | <i>Megachile rotundata</i>  |
| Mrot10030   | <i>setd</i>        | SETD  | <i>Megachile rotundata</i>  |
| Mrot10032   | <i>setd</i>        | SETD  | <i>Megachile rotundata</i>  |
| Mrot01630   | <i>Smyd4-2</i>     | SMYD  | <i>Megachile rotundata</i>  |
| Mrot11105   | <i>Smyd4-2</i>     | SMYD  | <i>Megachile rotundata</i>  |
| Mrot03129   | <i>Smyd4-3</i>     | SMYD  | <i>Megachile rotundata</i>  |
| Mrot01502   | <i>Smyd4-3</i>     | SMYD  | <i>Megachile rotundata</i>  |
| Mrot04731   | <i>Smyd4-4</i>     | SMYD  | <i>Megachile rotundata</i>  |
| Mrot11920   | <i>Smyd4-4</i>     | SMYD  | <i>Megachile rotundata</i>  |
| Mrot08726   | <i>Smyd5</i>       | SMYD  | <i>Megachile rotundata</i>  |
| Mrot07238   | <i>SmydA-1</i>     | SmydA | <i>Megachile rotundata</i>  |
| Mrot12858   | <i>SmydA-3</i>     | SmydA | <i>Megachile rotundata</i>  |
| Mrot12857   | <i>SmydA-4</i>     | SmydA | <i>Megachile rotundata</i>  |
| Mrot04012   | <i>SmydA-5</i>     | SmydA | <i>Megachile rotundata</i>  |
| Mrot02009   | <i>SmydA-8</i>     | SmydA | <i>Megachile rotundata</i>  |
| Mrot02583   | <i>suv</i>         | Suv   | <i>Megachile rotundata</i>  |
| Mrot12156   | <i>trr</i>         | Trx   | <i>Megachile rotundata</i>  |
| Mrot09154   | <i>trx</i>         | Trx   | <i>Megachile rotundata</i>  |
| Mrot02560   | <i>upSET(MLL5)</i> | -     | <i>Megachile rotundata</i>  |
| MESCA001248 | <i>ash1</i>        | Ash   | <i>Megaselia scalaris</i>   |
| MESCA007133 | <i>Blimp-1</i>     | PRDM  | <i>Megaselia scalaris</i>   |
| MESCA001701 | <i>Hmt4-20</i>     | -     | <i>Megaselia scalaris</i>   |
| MESCA006230 | <i>Mes-4</i>       | Ash   | <i>Megaselia scalaris</i>   |
| MESCA006340 | <i>Mes-4</i>       | Ash   | <i>Megaselia scalaris</i>   |

|                |                    |       |                                |
|----------------|--------------------|-------|--------------------------------|
| MESCA010216    | <i>Set1</i>        | Trx   | <i>Megaselia scalaris</i>      |
| MESCA005153    | <i>Smyd4-3</i>     | SMYD  | <i>Megaselia scalaris</i>      |
| MESCA007382    | <i>Smyd4-4</i>     | SMYD  | <i>Megaselia scalaris</i>      |
| MESCA003377    | <i>SmydA-3</i>     | SmydA | <i>Megaselia scalaris</i>      |
| MESCA004004    | <i>SmydA-6</i>     | SmydA | <i>Megaselia scalaris</i>      |
| MESCA001047    | <i>SmydA-8</i>     | SmydA | <i>Megaselia scalaris</i>      |
| MESCA006589    | <i>SmydA-9</i>     | SmydA | <i>Megaselia scalaris</i>      |
| MESCA004542    | <i>Su(var)3-9</i>  | Suv   | <i>Megaselia scalaris</i>      |
| MESCA005035    | <i>suv</i>         | Suv   | <i>Megaselia scalaris</i>      |
| Mqua05919      | -                  | -     | <i>Melipona quadrifasciata</i> |
| Mqua07221      | <i>ash1</i>        | Ash   | <i>Melipona quadrifasciata</i> |
| Mqua05825      | <i>Blimp-1</i>     | PRDM  | <i>Melipona quadrifasciata</i> |
| Mqua00462      | <i>egg</i>         | Suv   | <i>Melipona quadrifasciata</i> |
| Mqua13259      | <i>Ez</i>          | Ez    | <i>Melipona quadrifasciata</i> |
| Mqua10048      | <i>G9a</i>         | Suv   | <i>Melipona quadrifasciata</i> |
| Mqua05000      | <i>Hmt4-20</i>     | -     | <i>Melipona quadrifasciata</i> |
| Mqua13274      | <i>Mes-4</i>       | Ash   | <i>Melipona quadrifasciata</i> |
| Mqua05445      | <i>Set1</i>        | Trx   | <i>Melipona quadrifasciata</i> |
| Mqua08311      | <i>Set2</i>        | Ash   | <i>Melipona quadrifasciata</i> |
| Mqua06865      | <i>Set8</i>        | -     | <i>Melipona quadrifasciata</i> |
| Mqua05331      | <i>setd</i>        | SETD  | <i>Melipona quadrifasciata</i> |
| Mqua05329      | <i>setd</i>        | SETD  | <i>Melipona quadrifasciata</i> |
| Mqua10376      | <i>Smyd4-1</i>     | SMYD  | <i>Melipona quadrifasciata</i> |
| Mqua09547      | <i>Smyd4-2</i>     | SMYD  | <i>Melipona quadrifasciata</i> |
| Mqua13705      | <i>Smyd4-2</i>     | SMYD  | <i>Melipona quadrifasciata</i> |
| Mqua06430      | <i>Smyd4-3</i>     | SMYD  | <i>Melipona quadrifasciata</i> |
| Mqua02865      | <i>Smyd4-4</i>     | SMYD  | <i>Melipona quadrifasciata</i> |
| Mqua07821      | <i>Smyd4-4</i>     | SMYD  | <i>Melipona quadrifasciata</i> |
| Mqua11608      | <i>Smyd5</i>       | SMYD  | <i>Melipona quadrifasciata</i> |
| Mqua01976      | <i>SmydA-3</i>     | SmydA | <i>Melipona quadrifasciata</i> |
| Mqua01975      | <i>SmydA-4</i>     | SmydA | <i>Melipona quadrifasciata</i> |
| Mqua10068      | <i>SmydA-5</i>     | SmydA | <i>Melipona quadrifasciata</i> |
| Mqua01943      | <i>SmydA-8</i>     | SmydA | <i>Melipona quadrifasciata</i> |
| Mqua12688      | <i>Su(var)3-9</i>  | Suv   | <i>Melipona quadrifasciata</i> |
| Mqua10266      | <i>suv</i>         | Suv   | <i>Melipona quadrifasciata</i> |
| Mqua14950      | <i>trr</i>         | Trx   | <i>Melipona quadrifasciata</i> |
| Mqua15195      | <i>trx</i>         | Trx   | <i>Melipona quadrifasciata</i> |
| Mqua06846      | <i>upSET(MLL5)</i> | -     | <i>Melipona quadrifasciata</i> |
| MCINX005952-PA | <i>ash1</i>        | Ash   | <i>Melitaea cinxia</i>         |
| MCINX009345-PA | <i>Blimp-1</i>     | PRDM  | <i>Melitaea cinxia</i>         |
| MCINX010108-PA | <i>Hmt4-20</i>     | -     | <i>Melitaea cinxia</i>         |
| MCINX004631-PA | <i>Mes-4</i>       | Ash   | <i>Melitaea cinxia</i>         |
| MCINX015030-PA | <i>Set2</i>        | Ash   | <i>Melitaea cinxia</i>         |
| MCINX011554-PA | <i>Set8</i>        | -     | <i>Melitaea cinxia</i>         |

|                |                   |       |                                 |
|----------------|-------------------|-------|---------------------------------|
| MCINX010627-PA | <i>setd</i>       | SETD  | <i>Melitaea cinxia</i>          |
| MCINX003745-PA | <i>Smyd3</i>      | SMYD  | <i>Melitaea cinxia</i>          |
| MCINX008955-PA | <i>Smyd4-2</i>    | SMYD  | <i>Melitaea cinxia</i>          |
| MCINX016501-PA | <i>Smyd4-3</i>    | SMYD  | <i>Melitaea cinxia</i>          |
| MCINX000039-PA | <i>Smyd4-4</i>    | SMYD  | <i>Melitaea cinxia</i>          |
| MCINX006664-PA | <i>Smyd5</i>      | SMYD  | <i>Melitaea cinxia</i>          |
| MCINX002625-PA | <i>SmydA-1</i>    | SmydA | <i>Melitaea cinxia</i>          |
| MCINX012410-PA | <i>SmydA-2</i>    | SmydA | <i>Melitaea cinxia</i>          |
| MCINX003723-PA | <i>SmydA-3</i>    | SmydA | <i>Melitaea cinxia</i>          |
| MCINX012412-PA | <i>SmydA-5</i>    | SmydA | <i>Melitaea cinxia</i>          |
| MCINX004394-PA | <i>SmydA-8</i>    | SmydA | <i>Melitaea cinxia</i>          |
| MCINX012060-PA | <i>SmydA-8</i>    | SmydA | <i>Melitaea cinxia</i>          |
| MCINX002150-PA | <i>Su(var)3-9</i> | Suv   | <i>Melitaea cinxia</i>          |
| XP_003744440.1 | -                 | -     | <i>Metaseiulus occidentalis</i> |
| XP_003738192.1 | <i>Blimp-1</i>    | PRDM  | <i>Metaseiulus occidentalis</i> |
| XP_003747828.1 | <i>egg</i>        | Suv   | <i>Metaseiulus occidentalis</i> |
| XP_003748456.1 | <i>Ez</i>         | Ez    | <i>Metaseiulus occidentalis</i> |
| XP_003743205.1 | <i>G9a</i>        | Suv   | <i>Metaseiulus occidentalis</i> |
| XP_003745640.1 | <i>Hmt4-20</i>    | -     | <i>Metaseiulus occidentalis</i> |
| XP_003743600.1 | <i>Mes-4</i>      | Ash   | <i>Metaseiulus occidentalis</i> |
| XP_003737286.1 | <i>Set1</i>       | Trx   | <i>Metaseiulus occidentalis</i> |
| XP_003740543.1 | <i>Set8</i>       | -     | <i>Metaseiulus occidentalis</i> |
| XP_003745694.1 | <i>setd</i>       | SETD  | <i>Metaseiulus occidentalis</i> |
| XP_003742261.1 | <i>Smyd4-3</i>    | SMYD  | <i>Metaseiulus occidentalis</i> |
| XP_003748305.1 | <i>Su(var)3-9</i> | Suv   | <i>Metaseiulus occidentalis</i> |
| XP_003747129.1 | <i>Su(var)3-9</i> | Suv   | <i>Metaseiulus occidentalis</i> |
| XP_003747204.1 | <i>Su(var)3-9</i> | Suv   | <i>Metaseiulus occidentalis</i> |
| XP_003740087.1 | <i>trx</i>        | Trx   | <i>Metaseiulus occidentalis</i> |
| XP_003741200.1 | <i>trx</i>        | Trx   | <i>Metaseiulus occidentalis</i> |
| XP_008551336.2 | -                 | -     | <i>Microplitis demolitor</i>    |
| XP_008543689.1 | <i>ash1</i>       | Ash   | <i>Microplitis demolitor</i>    |
| XP_008543891.1 | <i>Blimp-1</i>    | PRDM  | <i>Microplitis demolitor</i>    |
| XP_008556889.1 | <i>egg</i>        | Suv   | <i>Microplitis demolitor</i>    |
| XP_008556241.1 | <i>Ez</i>         | Ez    | <i>Microplitis demolitor</i>    |
| XP_008556240.1 | <i>Ez</i>         | Ez    | <i>Microplitis demolitor</i>    |
| XP_008550724.1 | <i>G9a</i>        | Suv   | <i>Microplitis demolitor</i>    |
| XP_008550676.2 | <i>Hmt4-20</i>    | -     | <i>Microplitis demolitor</i>    |
| XP_008558386.1 | <i>Mes-4</i>      | Ash   | <i>Microplitis demolitor</i>    |
| XP_014297501.1 | <i>Set1</i>       | Trx   | <i>Microplitis demolitor</i>    |
| XP_008547281.1 | <i>Set2</i>       | Ash   | <i>Microplitis demolitor</i>    |
| XP_008557189.1 | <i>Set8</i>       | -     | <i>Microplitis demolitor</i>    |
| XP_008554714.2 | <i>setd</i>       | SETD  | <i>Microplitis demolitor</i>    |
| XP_014300365.1 | <i>Smyd4-1</i>    | SMYD  | <i>Microplitis demolitor</i>    |
| XP_008547557.1 | <i>Smyd4-2</i>    | SMYD  | <i>Microplitis demolitor</i>    |

|                |                    |       |                              |
|----------------|--------------------|-------|------------------------------|
| XP_008556773.1 | <i>Smyd4-2</i>     | SMYD  | <i>Microplitis demolitor</i> |
| XP_008560866.2 | <i>Smyd4-2</i>     | SMYD  | <i>Microplitis demolitor</i> |
| XP_014299276.1 | <i>Smyd4-2</i>     | SMYD  | <i>Microplitis demolitor</i> |
| XP_008547074.1 | <i>Smyd4-3</i>     | SMYD  | <i>Microplitis demolitor</i> |
| XP_008544157.1 | <i>Smyd4-3</i>     | SMYD  | <i>Microplitis demolitor</i> |
| XP_008544405.1 | <i>Smyd4-3</i>     | SMYD  | <i>Microplitis demolitor</i> |
| XP_008551110.1 | <i>Smyd4-3</i>     | SMYD  | <i>Microplitis demolitor</i> |
| XP_008551286.1 | <i>Smyd4-3</i>     | SMYD  | <i>Microplitis demolitor</i> |
| XP_008552149.1 | <i>Smyd4-3</i>     | SMYD  | <i>Microplitis demolitor</i> |
| XP_008552152.1 | <i>Smyd4-3</i>     | SMYD  | <i>Microplitis demolitor</i> |
| XP_008556789.1 | <i>Smyd4-3</i>     | SMYD  | <i>Microplitis demolitor</i> |
| XP_008560103.1 | <i>Smyd4-4</i>     | SMYD  | <i>Microplitis demolitor</i> |
| XP_008556774.1 | <i>Smyd4-4</i>     | SMYD  | <i>Microplitis demolitor</i> |
| XP_008558969.1 | <i>Smyd4-4</i>     | SMYD  | <i>Microplitis demolitor</i> |
| XP_014299567.1 | <i>Smyd4-4</i>     | SMYD  | <i>Microplitis demolitor</i> |
| XP_008546011.1 | <i>Smyd5</i>       | SMYD  | <i>Microplitis demolitor</i> |
| XP_008559572.1 | <i>SmydA-1</i>     | SmydA | <i>Microplitis demolitor</i> |
| XP_008547232.1 | <i>SmydA-3</i>     | SmydA | <i>Microplitis demolitor</i> |
| XP_008547423.1 | <i>SmydA-4</i>     | SmydA | <i>Microplitis demolitor</i> |
| XP_008552514.1 | <i>SmydA-5</i>     | SmydA | <i>Microplitis demolitor</i> |
| XP_014297848.1 | <i>Su(var)3-9</i>  | Suv   | <i>Microplitis demolitor</i> |
| XP_008558116.1 | <i>suv</i>         | Suv   | <i>Microplitis demolitor</i> |
| XP_014296916.1 | <i>trr</i>         | Trx   | <i>Microplitis demolitor</i> |
| XP_014295406.1 | <i>trx</i>         | Trx   | <i>Microplitis demolitor</i> |
| XP_014300525.1 | <i>upSET(MLL5)</i> | -     | <i>Microplitis demolitor</i> |
| XP_012522270.1 | -                  | -     | <i>Monomorium pharaonis</i>  |
| XP_012539904.1 | <i>Blimp-1</i>     | PRDM  | <i>Monomorium pharaonis</i>  |
| XP_012533484.1 | <i>Ez</i>          | Ez    | <i>Monomorium pharaonis</i>  |
| XP_012531062.1 | <i>G9a</i>         | Suv   | <i>Monomorium pharaonis</i>  |
| XP_012525264.1 | <i>Hmt4-20</i>     | -     | <i>Monomorium pharaonis</i>  |
| XP_012537168.1 | <i>Mes-4</i>       | Ash   | <i>Monomorium pharaonis</i>  |
| XP_012542824.1 | <i>Set1</i>        | Trx   | <i>Monomorium pharaonis</i>  |
| XP_012537071.1 | <i>Set2</i>        | Ash   | <i>Monomorium pharaonis</i>  |
| XP_012525334.1 | <i>setd</i>        | SETD  | <i>Monomorium pharaonis</i>  |
| XP_012526872.1 | <i>Smyd4-1</i>     | SMYD  | <i>Monomorium pharaonis</i>  |
| XP_012521783.1 | <i>Smyd4-2</i>     | SMYD  | <i>Monomorium pharaonis</i>  |
| XP_012540827.1 | <i>Smyd4-2</i>     | SMYD  | <i>Monomorium pharaonis</i>  |
| XP_012543048.1 | <i>Smyd4-3</i>     | SMYD  | <i>Monomorium pharaonis</i>  |
| XP_012522849.1 | <i>Smyd4-4</i>     | SMYD  | <i>Monomorium pharaonis</i>  |
| XP_012529035.1 | <i>Smyd5</i>       | SMYD  | <i>Monomorium pharaonis</i>  |
| XP_012537742.1 | <i>SmydA-3</i>     | SmydA | <i>Monomorium pharaonis</i>  |
| XP_012541306.1 | <i>SmydA-5</i>     | SmydA | <i>Monomorium pharaonis</i>  |
| XP_012532946.1 | <i>Su(var)3-9</i>  | Suv   | <i>Monomorium pharaonis</i>  |
| XP_012536533.1 | <i>suv</i>         | Suv   | <i>Monomorium pharaonis</i>  |

|                |                    |       |                             |
|----------------|--------------------|-------|-----------------------------|
| XP_012530896.1 | <i>trx</i>         | Trx   | <i>Monomorium pharaonis</i> |
| XP_012541438.1 | <i>upSET(MLL5)</i> | -     | <i>Monomorium pharaonis</i> |
| MDOA006797     | <i>ash1</i>        | Ash   | <i>Musca domestica</i>      |
| MDOA009229     | <i>egg</i>         | Suv   | <i>Musca domestica</i>      |
| MDOA008795     | <i>Ez</i>          | Ez    | <i>Musca domestica</i>      |
| MDOA000093     | <i>G9a</i>         | Suv   | <i>Musca domestica</i>      |
| MDOA011066     | <i>Hmt4-20</i>     | -     | <i>Musca domestica</i>      |
| MDOA002588     | <i>Mes-4</i>       | Ash   | <i>Musca domestica</i>      |
| MDOA004753     | <i>Set1</i>        | Trx   | <i>Musca domestica</i>      |
| MDOA011328     | <i>Set2</i>        | Ash   | <i>Musca domestica</i>      |
| MDOA007714     | <i>Set8</i>        | -     | <i>Musca domestica</i>      |
| MDOA006911     | <i>setd</i>        | SETD  | <i>Musca domestica</i>      |
| MDOA000682     | <i>Smyd4-1</i>     | SMYD  | <i>Musca domestica</i>      |
| MDOA007016     | <i>Smyd4-2</i>     | SMYD  | <i>Musca domestica</i>      |
| MDOA015400     | <i>Smyd4-3</i>     | SMYD  | <i>Musca domestica</i>      |
| MDOA012031     | <i>Smyd4-4</i>     | SMYD  | <i>Musca domestica</i>      |
| MDOA014801     | <i>Smyd5</i>       | SMYD  | <i>Musca domestica</i>      |
| MDOA009538     | <i>SmydA-1</i>     | SmydA | <i>Musca domestica</i>      |
| MDOA004951     | <i>SmydA-2</i>     | SmydA | <i>Musca domestica</i>      |
| MDOA011361     | <i>SmydA-3</i>     | SmydA | <i>Musca domestica</i>      |
| MDOA009762     | <i>SmydA-4</i>     | SmydA | <i>Musca domestica</i>      |
| MDOA006356     | <i>SmydA-5</i>     | SmydA | <i>Musca domestica</i>      |
| MDOA009169     | <i>SmydA-6</i>     | SmydA | <i>Musca domestica</i>      |
| MDOA001694     | <i>SmydA-6</i>     | SmydA | <i>Musca domestica</i>      |
| MDOA013751     | <i>SmydA-6</i>     | SmydA | <i>Musca domestica</i>      |
| MDOA000486     | <i>SmydA-7</i>     | SmydA | <i>Musca domestica</i>      |
| MDOA000184     | <i>SmydA-8</i>     | SmydA | <i>Musca domestica</i>      |
| MDOA004711     | <i>SmydA-8</i>     | SmydA | <i>Musca domestica</i>      |
| MDOA006415     | <i>SmydA-8</i>     | SmydA | <i>Musca domestica</i>      |
| MDOA008409     | <i>SmydA-8</i>     | SmydA | <i>Musca domestica</i>      |
| MDOA012054     | <i>SmydA-8</i>     | SmydA | <i>Musca domestica</i>      |
| MDOA015493     | <i>SmydA-8</i>     | SmydA | <i>Musca domestica</i>      |
| MDOA007214     | <i>SmydA-9</i>     | SmydA | <i>Musca domestica</i>      |
| MDOA006177     | <i>SmydA-9</i>     | SmydA | <i>Musca domestica</i>      |
| MDOA008584     | <i>Su(var)3-9</i>  | Suv   | <i>Musca domestica</i>      |
| MDOA014040     | <i>trr</i>         | Trx   | <i>Musca domestica</i>      |
| MDOA009761     | <i>trx</i>         | Trx   | <i>Musca domestica</i>      |
| MDOA013044     | <i>upSET(MLL5)</i> | -     | <i>Musca domestica</i>      |
| NV11654        | -                  | -     | <i>Nasonia vitripennis</i>  |
| NV14044        | -                  | -     | <i>Nasonia vitripennis</i>  |
| NV14087        | -                  | -     | <i>Nasonia vitripennis</i>  |
| NV17278        | -                  | -     | <i>Nasonia vitripennis</i>  |
| NV17530        | -                  | -     | <i>Nasonia vitripennis</i>  |
| NV19191        | -                  | -     | <i>Nasonia vitripennis</i>  |

|         |                   |       |                            |
|---------|-------------------|-------|----------------------------|
| NV22581 | -                 | -     | <i>Nasonia vitripennis</i> |
| NV25539 | -                 | -     | <i>Nasonia vitripennis</i> |
| NV25558 | -                 | -     | <i>Nasonia vitripennis</i> |
| NV14047 | <i>ash1</i>       | Ash   | <i>Nasonia vitripennis</i> |
| NV12817 | <i>Blimp-1</i>    | PRDM  | <i>Nasonia vitripennis</i> |
| NV10069 | <i>egg</i>        | Suv   | <i>Nasonia vitripennis</i> |
| NV18919 | <i>Ez</i>         | Ez    | <i>Nasonia vitripennis</i> |
| NV11612 | <i>G9a</i>        | Suv   | <i>Nasonia vitripennis</i> |
| NV18604 | <i>Hmt4-20</i>    | -     | <i>Nasonia vitripennis</i> |
| NV18533 | <i>Hmt4-20</i>    | -     | <i>Nasonia vitripennis</i> |
| NV11023 | <i>Mes-4</i>      | Ash   | <i>Nasonia vitripennis</i> |
| NV15594 | <i>Set1</i>       | Trx   | <i>Nasonia vitripennis</i> |
| NV11717 | <i>Set2</i>       | Ash   | <i>Nasonia vitripennis</i> |
| NV11709 | <i>Set8</i>       | -     | <i>Nasonia vitripennis</i> |
| NV11710 | <i>Set8</i>       | -     | <i>Nasonia vitripennis</i> |
| NV18081 | <i>Set8</i>       | -     | <i>Nasonia vitripennis</i> |
| NV22706 | <i>Set8</i>       | -     | <i>Nasonia vitripennis</i> |
| NV25438 | <i>Set8</i>       | -     | <i>Nasonia vitripennis</i> |
| NV26123 | <i>Set8</i>       | -     | <i>Nasonia vitripennis</i> |
| NV10907 | <i>setd</i>       | SETD  | <i>Nasonia vitripennis</i> |
| NV21718 | <i>Smyd4-2</i>    | SMYD  | <i>Nasonia vitripennis</i> |
| NV19127 | <i>Smyd4-3</i>    | SMYD  | <i>Nasonia vitripennis</i> |
| NV10465 | <i>Smyd4-3</i>    | SMYD  | <i>Nasonia vitripennis</i> |
| NV11407 | <i>Smyd4-3</i>    | SMYD  | <i>Nasonia vitripennis</i> |
| NV13931 | <i>Smyd4-3</i>    | SMYD  | <i>Nasonia vitripennis</i> |
| NV18759 | <i>Smyd4-3</i>    | SMYD  | <i>Nasonia vitripennis</i> |
| NV22774 | <i>Smyd4-3</i>    | SMYD  | <i>Nasonia vitripennis</i> |
| NV18064 | <i>Smyd4-4</i>    | SMYD  | <i>Nasonia vitripennis</i> |
| NV10223 | <i>Smyd4-4</i>    | SMYD  | <i>Nasonia vitripennis</i> |
| NV12278 | <i>Smyd4-4</i>    | SMYD  | <i>Nasonia vitripennis</i> |
| NV13215 | <i>Smyd4-4</i>    | SMYD  | <i>Nasonia vitripennis</i> |
| NV14061 | <i>Smyd4-4</i>    | SMYD  | <i>Nasonia vitripennis</i> |
| NV21824 | <i>Smyd4-4</i>    | SMYD  | <i>Nasonia vitripennis</i> |
| NV22744 | <i>Smyd4-4</i>    | SMYD  | <i>Nasonia vitripennis</i> |
| NV23325 | <i>Smyd4-4</i>    | SMYD  | <i>Nasonia vitripennis</i> |
| NV23933 | <i>Smyd4-4</i>    | SMYD  | <i>Nasonia vitripennis</i> |
| NV18013 | <i>Smyd5</i>      | SMYD  | <i>Nasonia vitripennis</i> |
| NV14832 | <i>SmydA-1</i>    | SmydA | <i>Nasonia vitripennis</i> |
| NV11805 | <i>SmydA-3</i>    | SmydA | <i>Nasonia vitripennis</i> |
| NV13135 | <i>SmydA-5</i>    | SmydA | <i>Nasonia vitripennis</i> |
| NV11804 | <i>SmydA-6</i>    | SmydA | <i>Nasonia vitripennis</i> |
| NV24437 | <i>SmydA-8</i>    | SmydA | <i>Nasonia vitripennis</i> |
| NV17813 | <i>Su(var)3-9</i> | Suv   | <i>Nasonia vitripennis</i> |
| NV16420 | <i>suv</i>        | Suv   | <i>Nasonia vitripennis</i> |

|             |                    |       |                             |
|-------------|--------------------|-------|-----------------------------|
| NV15493     | <i>trr</i>         | Trx   | <i>Nasonia vitripennis</i>  |
| NV16583     | <i>upSET(MLL5)</i> | -     | <i>Nasonia vitripennis</i>  |
| NLU012366.1 | -                  | -     | <i>Nilaparvata lugens</i>   |
| NLU025978.1 | <i>Blimp-1</i>     | PRDM  | <i>Nilaparvata lugens</i>   |
| NLU002390.1 | <i>Blimp-1</i>     | PRDM  | <i>Nilaparvata lugens</i>   |
| NLU012796.1 | <i>Blimp-1</i>     | PRDM  | <i>Nilaparvata lugens</i>   |
| NLU014118.1 | <i>Blimp-1</i>     | PRDM  | <i>Nilaparvata lugens</i>   |
| NLU016192.1 | <i>Blimp-1</i>     | PRDM  | <i>Nilaparvata lugens</i>   |
| NLU018902.1 | <i>Blimp-1</i>     | PRDM  | <i>Nilaparvata lugens</i>   |
| NLU016222.1 | <i>egg</i>         | Suv   | <i>Nilaparvata lugens</i>   |
| NLU021947.1 | <i>egg</i>         | Suv   | <i>Nilaparvata lugens</i>   |
| NLU024424.3 | <i>Ez</i>          | Ez    | <i>Nilaparvata lugens</i>   |
| NLU019099.2 | <i>G9a</i>         | Suv   | <i>Nilaparvata lugens</i>   |
| NLU018930.1 | <i>G9a</i>         | Suv   | <i>Nilaparvata lugens</i>   |
| NLU012978.1 | <i>Hmt4-20</i>     | -     | <i>Nilaparvata lugens</i>   |
| NLU027254.1 | <i>Mes-4</i>       | Ash   | <i>Nilaparvata lugens</i>   |
| NLU002794.2 | <i>Set1</i>        | Trx   | <i>Nilaparvata lugens</i>   |
| NLU010322.1 | <i>Set1</i>        | Trx   | <i>Nilaparvata lugens</i>   |
| NLU022938.1 | <i>Set2</i>        | Ash   | <i>Nilaparvata lugens</i>   |
| NLU016891.1 | <i>Set8</i>        | -     | <i>Nilaparvata lugens</i>   |
| NLU023473.1 | <i>setd</i>        | SETD  | <i>Nilaparvata lugens</i>   |
| NLU028562.1 | <i>Smyd4-1</i>     | SMYD  | <i>Nilaparvata lugens</i>   |
| NLU009524.1 | <i>Smyd4-3</i>     | SMYD  | <i>Nilaparvata lugens</i>   |
| NLU015176.1 | <i>Smyd4-3</i>     | SMYD  | <i>Nilaparvata lugens</i>   |
| NLU014703.1 | <i>Smyd5</i>       | SMYD  | <i>Nilaparvata lugens</i>   |
| NLU003997.1 | <i>SmydA-2</i>     | SmydA | <i>Nilaparvata lugens</i>   |
| NLU013240.1 | <i>SmydA-3</i>     | SmydA | <i>Nilaparvata lugens</i>   |
| NLU005116.1 | <i>SmydA-4</i>     | SmydA | <i>Nilaparvata lugens</i>   |
| NLU008274.1 | <i>SmydA-6</i>     | SmydA | <i>Nilaparvata lugens</i>   |
| NLU028809.1 | <i>trr</i>         | Trx   | <i>Nilaparvata lugens</i>   |
| NLU017111.1 | <i>trx</i>         | Trx   | <i>Nilaparvata lugens</i>   |
| OFAS004228  | <i>egg</i>         | Suv   | <i>Oncopeltus fasciatus</i> |
| OFAS004227  | <i>egg</i>         | Suv   | <i>Oncopeltus fasciatus</i> |
| OFAS002597  | <i>Ez</i>          | Ez    | <i>Oncopeltus fasciatus</i> |
| OFAS007451  | <i>G9a</i>         | Suv   | <i>Oncopeltus fasciatus</i> |
| OFAS005156  | <i>Hmt4-20</i>     | -     | <i>Oncopeltus fasciatus</i> |
| OFAS010169  | <i>Mes-4</i>       | Ash   | <i>Oncopeltus fasciatus</i> |
| OFAS013257  | <i>Set1</i>        | Trx   | <i>Oncopeltus fasciatus</i> |
| OFAS017996  | <i>Set1</i>        | Trx   | <i>Oncopeltus fasciatus</i> |
| OFAS003387  | <i>Set2</i>        | Ash   | <i>Oncopeltus fasciatus</i> |
| OFAS000414  | <i>Set8</i>        | -     | <i>Oncopeltus fasciatus</i> |
| OFAS015992  | <i>setd</i>        | SETD  | <i>Oncopeltus fasciatus</i> |
| OFAS002440  | <i>Smyd3</i>       | SMYD  | <i>Oncopeltus fasciatus</i> |
| OFAS001027  | <i>Smyd4-2</i>     | SMYD  | <i>Oncopeltus fasciatus</i> |



|            |                    |       |                             |
|------------|--------------------|-------|-----------------------------|
| OFAS009133 | <i>Smyd4-3</i>     | SMYD  | <i>Oncopeltus fasciatus</i> |
| OFAS000512 | <i>Smyd4-3</i>     | SMYD  | <i>Oncopeltus fasciatus</i> |
| OFAS016549 | <i>Smyd4-4</i>     | SMYD  | <i>Oncopeltus fasciatus</i> |
| OFAS013600 | <i>Smyd5</i>       | SMYD  | <i>Oncopeltus fasciatus</i> |
| OFAS003209 | <i>SmydA-3</i>     | SmydA | <i>Oncopeltus fasciatus</i> |
| OFAS000133 | <i>SmydA-5</i>     | SmydA | <i>Oncopeltus fasciatus</i> |
| OFAS008714 | <i>SmydA-8</i>     | SmydA | <i>Oncopeltus fasciatus</i> |
| OFAS016410 | <i>Su(var)3-9</i>  | Suv   | <i>Oncopeltus fasciatus</i> |
| OFAS015321 | <i>suv</i>         | Suv   | <i>Oncopeltus fasciatus</i> |
| OFAS000131 | <i>trr</i>         | Trx   | <i>Oncopeltus fasciatus</i> |
| OFAS006231 | <i>trx</i>         | Trx   | <i>Oncopeltus fasciatus</i> |
| OFAS006758 | <i>upSET(MLL5)</i> | -     | <i>Oncopeltus fasciatus</i> |
| OFAS002811 | <i>upSET(MLL5)</i> | -     | <i>Oncopeltus fasciatus</i> |
| OTAU016833 | <i>ash1</i>        | Ash   | <i>Onthophagus taurus</i>   |
| OTAU005915 | <i>Blimp-1</i>     | PRDM  | <i>Onthophagus taurus</i>   |
| OTAU013038 | <i>egg</i>         | Suv   | <i>Onthophagus taurus</i>   |
| OTAU006929 | <i>Ez</i>          | Ez    | <i>Onthophagus taurus</i>   |
| OTAU016220 | <i>G9a</i>         | Suv   | <i>Onthophagus taurus</i>   |
| OTAU010040 | <i>Hmt4-20</i>     | -     | <i>Onthophagus taurus</i>   |
| OTAU009395 | <i>Mes-4</i>       | Ash   | <i>Onthophagus taurus</i>   |
| OTAU015711 | <i>Set1</i>        | Trx   | <i>Onthophagus taurus</i>   |
| OTAU003183 | <i>Set2</i>        | Ash   | <i>Onthophagus taurus</i>   |
| OTAU007446 | <i>Set8</i>        | -     | <i>Onthophagus taurus</i>   |
| OTAU011533 | <i>setd</i>        | SETD  | <i>Onthophagus taurus</i>   |
| OTAU007040 | <i>Smyd4-1</i>     | SMYD  | <i>Onthophagus taurus</i>   |
| OTAU008673 | <i>Smyd4-2</i>     | SMYD  | <i>Onthophagus taurus</i>   |
| OTAU001249 | <i>Smyd4-3</i>     | SMYD  | <i>Onthophagus taurus</i>   |
| OTAU000114 | <i>Smyd5</i>       | SMYD  | <i>Onthophagus taurus</i>   |
| OTAU005073 | <i>SmydA-1</i>     | SmydA | <i>Onthophagus taurus</i>   |
| OTAU009777 | <i>SmydA-2</i>     | SmydA | <i>Onthophagus taurus</i>   |
| OTAU010523 | <i>SmydA-3</i>     | SmydA | <i>Onthophagus taurus</i>   |
| OTAU005071 | <i>SmydA-4</i>     | SmydA | <i>Onthophagus taurus</i>   |
| OTAU011495 | <i>SmydA-4</i>     | SmydA | <i>Onthophagus taurus</i>   |
| OTAU005068 | <i>SmydA-5</i>     | SmydA | <i>Onthophagus taurus</i>   |
| OTAU002653 | <i>SmydA-8</i>     | SmydA | <i>Onthophagus taurus</i>   |
| OTAU013106 | <i>Su(var)3-9</i>  | Suv   | <i>Onthophagus taurus</i>   |
| OTAU008228 | <i>suv</i>         | Suv   | <i>Onthophagus taurus</i>   |
| OTAU006134 | <i>trr</i>         | Trx   | <i>Onthophagus taurus</i>   |
| OTAU008921 | <i>trx</i>         | Trx   | <i>Onthophagus taurus</i>   |
| OTAU000670 | <i>upSET(MLL5)</i> | -     | <i>Onthophagus taurus</i>   |
| ODN02559.1 | -                  | -     | <i>Orchesella cincta</i>    |
| ODN06200.1 | -                  | -     | <i>Orchesella cincta</i>    |
| ODM99115.1 | -                  | -     | <i>Orchesella cincta</i>    |
| ODN00252.1 | -                  | -     | <i>Orchesella cincta</i>    |

|            |                |       |                          |
|------------|----------------|-------|--------------------------|
| ODN01047.1 | -              | -     | <i>Orchesella cincta</i> |
| ODN06313.1 | -              | -     | <i>Orchesella cincta</i> |
| ODM98315.1 | <i>ash1</i>    | Ash   | <i>Orchesella cincta</i> |
| ODM87160.1 | <i>ash1</i>    | Ash   | <i>Orchesella cincta</i> |
| ODM87234.1 | <i>Blimp-1</i> | PRDM  | <i>Orchesella cincta</i> |
| ODM97156.1 | <i>egg</i>     | Suv   | <i>Orchesella cincta</i> |
| ODM86873.1 | <i>egg</i>     | Suv   | <i>Orchesella cincta</i> |
| ODM88374.1 | <i>egg</i>     | Suv   | <i>Orchesella cincta</i> |
| ODM89038.1 | <i>egg</i>     | Suv   | <i>Orchesella cincta</i> |
| ODM90642.1 | <i>egg</i>     | Suv   | <i>Orchesella cincta</i> |
| ODM91289.1 | <i>egg</i>     | Suv   | <i>Orchesella cincta</i> |
| ODM97270.1 | <i>egg</i>     | Suv   | <i>Orchesella cincta</i> |
| ODM99504.1 | <i>egg</i>     | Suv   | <i>Orchesella cincta</i> |
| ODN05360.1 | <i>Ez</i>      | Ez    | <i>Orchesella cincta</i> |
| ODM92914.1 | <i>Ez</i>      | Ez    | <i>Orchesella cincta</i> |
| ODN00488.1 | <i>Ez</i>      | Ez    | <i>Orchesella cincta</i> |
| ODN01184.1 | <i>Ez</i>      | Ez    | <i>Orchesella cincta</i> |
| ODN02335.1 | <i>Ez</i>      | Ez    | <i>Orchesella cincta</i> |
| ODM87354.1 | <i>G9a</i>     | Suv   | <i>Orchesella cincta</i> |
| ODM98111.1 | <i>G9a</i>     | Suv   | <i>Orchesella cincta</i> |
| ODN00570.1 | <i>Hmt4-20</i> | -     | <i>Orchesella cincta</i> |
| ODM88966.1 | <i>Hmt4-20</i> | -     | <i>Orchesella cincta</i> |
| ODN05117.1 | <i>Hmt4-20</i> | -     | <i>Orchesella cincta</i> |
| ODM92236.1 | <i>Mes-4</i>   | Ash   | <i>Orchesella cincta</i> |
| ODN04926.1 | <i>Set1</i>    | Trx   | <i>Orchesella cincta</i> |
| ODN01969.1 | <i>Set1</i>    | Trx   | <i>Orchesella cincta</i> |
| ODM96183.1 | <i>Set2</i>    | Ash   | <i>Orchesella cincta</i> |
| ODN04218.1 | <i>Set8</i>    | -     | <i>Orchesella cincta</i> |
| ODM90018.1 | <i>Set8</i>    | -     | <i>Orchesella cincta</i> |
| ODM94229.1 | <i>setd</i>    | SETD  | <i>Orchesella cincta</i> |
| ODM99569.1 | <i>Smyd4-2</i> | SMYD  | <i>Orchesella cincta</i> |
| ODM95186.1 | <i>Smyd4-2</i> | SMYD  | <i>Orchesella cincta</i> |
| ODM97274.1 | <i>Smyd4-2</i> | SMYD  | <i>Orchesella cincta</i> |
| ODN03065.1 | <i>Smyd4-3</i> | SMYD  | <i>Orchesella cincta</i> |
| ODN03685.1 | <i>Smyd4-3</i> | SMYD  | <i>Orchesella cincta</i> |
| ODN05092.1 | <i>Smyd4-3</i> | SMYD  | <i>Orchesella cincta</i> |
| ODM91701.1 | <i>Smyd4-4</i> | SMYD  | <i>Orchesella cincta</i> |
| ODN00025.1 | <i>Smyd5</i>   | SMYD  | <i>Orchesella cincta</i> |
| ODM97856.1 | <i>SmydA-1</i> | SmydA | <i>Orchesella cincta</i> |
| ODM97009.1 | <i>SmydA-1</i> | SmydA | <i>Orchesella cincta</i> |
| ODM96368.1 | <i>SmydA-2</i> | SmydA | <i>Orchesella cincta</i> |
| ODN02580.1 | <i>SmydA-2</i> | SmydA | <i>Orchesella cincta</i> |
| ODN04487.1 | <i>SmydA-2</i> | SmydA | <i>Orchesella cincta</i> |
| ODM91338.1 | <i>SmydA-3</i> | SmydA | <i>Orchesella cincta</i> |

|            |                    |       |                          |
|------------|--------------------|-------|--------------------------|
| ODM98666.1 | <i>SmydA-4</i>     | SmydA | <i>Orchesella cincta</i> |
| ODM87448.1 | <i>SmydA-4</i>     | SmydA | <i>Orchesella cincta</i> |
| ODM90870.1 | <i>SmydA-4</i>     | SmydA | <i>Orchesella cincta</i> |
| ODM95333.1 | <i>SmydA-4</i>     | SmydA | <i>Orchesella cincta</i> |
| ODM99451.1 | <i>SmydA-4</i>     | SmydA | <i>Orchesella cincta</i> |
| ODN02118.1 | <i>SmydA-4</i>     | SmydA | <i>Orchesella cincta</i> |
| ODN02948.1 | <i>SmydA-4</i>     | SmydA | <i>Orchesella cincta</i> |
| ODM90778.1 | <i>SmydA-5</i>     | SmydA | <i>Orchesella cincta</i> |
| ODM93675.1 | <i>SmydA-5</i>     | SmydA | <i>Orchesella cincta</i> |
| ODM97389.1 | <i>Su(var)3-9</i>  | Suv   | <i>Orchesella cincta</i> |
| ODM88213.1 | <i>Su(var)3-9</i>  | Suv   | <i>Orchesella cincta</i> |
| ODM88636.1 | <i>Su(var)3-9</i>  | Suv   | <i>Orchesella cincta</i> |
| ODM88637.1 | <i>Su(var)3-9</i>  | Suv   | <i>Orchesella cincta</i> |
| ODM96262.1 | <i>Su(var)3-9</i>  | Suv   | <i>Orchesella cincta</i> |
| ODM98559.1 | <i>Su(var)3-9</i>  | Suv   | <i>Orchesella cincta</i> |
| ODM99256.1 | <i>Su(var)3-9</i>  | Suv   | <i>Orchesella cincta</i> |
| ODN04495.1 | <i>Su(var)3-9</i>  | Suv   | <i>Orchesella cincta</i> |
| ODN06241.1 | <i>Su(var)3-9</i>  | Suv   | <i>Orchesella cincta</i> |
| ODN00513.1 | <i>trr</i>         | Trx   | <i>Orchesella cincta</i> |
| ODN04290.1 | <i>trx</i>         | Trx   | <i>Orchesella cincta</i> |
| ODM95869.1 | <i>upSET(MLL5)</i> | -     | <i>Orchesella cincta</i> |
| OABI008652 | -                  | -     | <i>Orussus abietinus</i> |
| OABI010009 | <i>ash1</i>        | Ash   | <i>Orussus abietinus</i> |
| OABI000954 | <i>Blimp-1</i>     | PRDM  | <i>Orussus abietinus</i> |
| OABI000487 | <i>egg</i>         | Suv   | <i>Orussus abietinus</i> |
| OABI009712 | <i>Ez</i>          | Ez    | <i>Orussus abietinus</i> |
| OABI010588 | <i>G9a</i>         | Suv   | <i>Orussus abietinus</i> |
| OABI008210 | <i>Hmt4-20</i>     | -     | <i>Orussus abietinus</i> |
| OABI008285 | <i>Set1</i>        | Trx   | <i>Orussus abietinus</i> |
| OABI008237 | <i>Set2</i>        | Ash   | <i>Orussus abietinus</i> |
| OABI000345 | <i>Set8</i>        | -     | <i>Orussus abietinus</i> |
| OABI006484 | <i>setd</i>        | SETD  | <i>Orussus abietinus</i> |
| OABI006487 | <i>setd</i>        | SETD  | <i>Orussus abietinus</i> |
| OABI007310 | <i>Smyd3</i>       | SMYD  | <i>Orussus abietinus</i> |
| OABI005724 | <i>Smyd4-1</i>     | SMYD  | <i>Orussus abietinus</i> |
| OABI001704 | <i>Smyd4-3</i>     | SMYD  | <i>Orussus abietinus</i> |
| OABI010928 | <i>Smyd4-4</i>     | SMYD  | <i>Orussus abietinus</i> |
| OABI003492 | <i>Smyd4-4</i>     | SMYD  | <i>Orussus abietinus</i> |
| OABI007980 | <i>Smyd4-4</i>     | SMYD  | <i>Orussus abietinus</i> |
| OABI007981 | <i>Smyd4-4</i>     | SMYD  | <i>Orussus abietinus</i> |
| OABI007993 | <i>Smyd4-4</i>     | SMYD  | <i>Orussus abietinus</i> |
| OABI007995 | <i>Smyd4-4</i>     | SMYD  | <i>Orussus abietinus</i> |
| OABI008791 | <i>Smyd4-4</i>     | SMYD  | <i>Orussus abietinus</i> |
| OABI002192 | <i>Smyd5</i>       | SMYD  | <i>Orussus abietinus</i> |

|            |                    |       |                            |
|------------|--------------------|-------|----------------------------|
| OABI008617 | <i>SmydA-3</i>     | SmydA | <i>Orussus abietinus</i>   |
| OABI001072 | <i>SmydA-5</i>     | SmydA | <i>Orussus abietinus</i>   |
| OABI001784 | <i>SmydA-8</i>     | SmydA | <i>Orussus abietinus</i>   |
| OABI000427 | <i>suv</i>         | Suv   | <i>Orussus abietinus</i>   |
| OABI010801 | <i>trr</i>         | Trx   | <i>Orussus abietinus</i>   |
| OABI000651 | <i>trx</i>         | Trx   | <i>Orussus abietinus</i>   |
| OABI004271 | <i>upSET(MLL5)</i> | -     | <i>Orussus abietinus</i>   |
| KRT79956.1 | -                  | -     | <i>Oryctes borbonicus</i>  |
| KRT83921.1 | <i>ash1</i>        | Ash   | <i>Oryctes borbonicus</i>  |
| KRT86642.1 | <i>Blimp-1</i>     | PRDM  | <i>Oryctes borbonicus</i>  |
| KRT84106.1 | <i>egg</i>         | Suv   | <i>Oryctes borbonicus</i>  |
| KRT84107.1 | <i>egg</i>         | Suv   | <i>Oryctes borbonicus</i>  |
| KRT78790.1 | <i>G9a</i>         | Suv   | <i>Oryctes borbonicus</i>  |
| KRT81536.1 | <i>Hmt4-20</i>     | -     | <i>Oryctes borbonicus</i>  |
| KRT86397.1 | <i>Mes-4</i>       | Ash   | <i>Oryctes borbonicus</i>  |
| KRT81143.1 | <i>Set1</i>        | Trx   | <i>Oryctes borbonicus</i>  |
| KRT79337.1 | <i>Set2</i>        | Ash   | <i>Oryctes borbonicus</i>  |
| KRT86230.1 | <i>Set8</i>        | -     | <i>Oryctes borbonicus</i>  |
| KRT82960.1 | <i>setd</i>        | SETD  | <i>Oryctes borbonicus</i>  |
| KRT79564.1 | <i>Smyd3</i>       | SMYD  | <i>Oryctes borbonicus</i>  |
| KRT82312.1 | <i>Smyd4-2</i>     | SMYD  | <i>Oryctes borbonicus</i>  |
| KRT79853.1 | <i>Smyd4-3</i>     | SMYD  | <i>Oryctes borbonicus</i>  |
| KRT78451.1 | <i>Smyd4-3</i>     | SMYD  | <i>Oryctes borbonicus</i>  |
| KRT85673.1 | <i>Smyd4-4</i>     | SMYD  | <i>Oryctes borbonicus</i>  |
| KRT80014.1 | <i>Smyd5</i>       | SMYD  | <i>Oryctes borbonicus</i>  |
| KRT84042.1 | <i>SmydA-1</i>     | SmydA | <i>Oryctes borbonicus</i>  |
| KRT82251.1 | <i>SmydA-3</i>     | SmydA | <i>Oryctes borbonicus</i>  |
| KRT79705.1 | <i>SmydA-4</i>     | SmydA | <i>Oryctes borbonicus</i>  |
| KRT80077.1 | <i>SmydA-4</i>     | SmydA | <i>Oryctes borbonicus</i>  |
| KRT84745.1 | <i>SmydA-5</i>     | SmydA | <i>Oryctes borbonicus</i>  |
| KRT80385.1 | <i>upSET(MLL5)</i> | -     | <i>Oryctes borbonicus</i>  |
| PVEN003514 | -                  | -     | <i>Pachypsylla venusta</i> |
| PVEN008929 | -                  | -     | <i>Pachypsylla venusta</i> |
| PVEN003699 | <i>ash1</i>        | Ash   | <i>Pachypsylla venusta</i> |
| PVEN006306 | <i>Blimp-1</i>     | PRDM  | <i>Pachypsylla venusta</i> |
| PVEN009898 | <i>Blimp-1</i>     | PRDM  | <i>Pachypsylla venusta</i> |
| PVEN005308 | <i>egg</i>         | Suv   | <i>Pachypsylla venusta</i> |
| PVEN003345 | <i>Ez</i>          | Ez    | <i>Pachypsylla venusta</i> |
| PVEN007112 | <i>Hmt4-20</i>     | -     | <i>Pachypsylla venusta</i> |
| PVEN009344 | <i>Set2</i>        | Ash   | <i>Pachypsylla venusta</i> |
| PVEN005377 | <i>Set8</i>        | -     | <i>Pachypsylla venusta</i> |
| PVEN004854 | <i>setd</i>        | SETD  | <i>Pachypsylla venusta</i> |
| PVEN004408 | <i>Smyd4-3</i>     | SMYD  | <i>Pachypsylla venusta</i> |
| PVEN001191 | <i>SmydA-2</i>     | SmydA | <i>Pachypsylla venusta</i> |

|                     |                    |       |                            |
|---------------------|--------------------|-------|----------------------------|
| PVEN012478          | <i>SmydA-3</i>     | SmydA | <i>Pachypsylla venusta</i> |
| PVEN008317          | <i>SmydA-5</i>     | SmydA | <i>Pachypsylla venusta</i> |
| PVEN004358          | <i>SmydA-8</i>     | SmydA | <i>Pachypsylla venusta</i> |
| PVEN001009          | <i>Su(var)3-9</i>  | Suv   | <i>Pachypsylla venusta</i> |
| PVEN003916          | <i>Su(var)3-9</i>  | Suv   | <i>Pachypsylla venusta</i> |
| PVEN007921          | <i>trx</i>         | Trx   | <i>Pachypsylla venusta</i> |
| PVEN007586          | <i>upSET(MLL5)</i> | -     | <i>Pachypsylla venusta</i> |
| PpolytesGene0010193 | -                  | -     | <i>Papilio polytes</i>     |
| PpolytesGene0003344 | <i>ash1</i>        | Ash   | <i>Papilio polytes</i>     |
| PpolytesGene0002656 | <i>Blimp-1</i>     | PRDM  | <i>Papilio polytes</i>     |
| PpolytesGene0001401 | <i>egg</i>         | Suv   | <i>Papilio polytes</i>     |
| PpolytesGene0007131 | <i>Hmt4-20</i>     | -     | <i>Papilio polytes</i>     |
| PpolytesGene0001743 | <i>Mes-4</i>       | Ash   | <i>Papilio polytes</i>     |
| PpolytesGene0009812 | <i>Set1</i>        | Trx   | <i>Papilio polytes</i>     |
| PpolytesGene0006463 | <i>Set2</i>        | Ash   | <i>Papilio polytes</i>     |
| PpolytesGene0009737 | <i>Set8</i>        | -     | <i>Papilio polytes</i>     |
| PpolytesGene0003757 | <i>setd</i>        | SETD  | <i>Papilio polytes</i>     |
| PpolytesGene0011948 | <i>Smyd4-1</i>     | SMYD  | <i>Papilio polytes</i>     |
| PpolytesGene0010418 | <i>Smyd4-2</i>     | SMYD  | <i>Papilio polytes</i>     |
| PpolytesGene0000390 | <i>Smyd4-3</i>     | SMYD  | <i>Papilio polytes</i>     |
| PpolytesGene0002992 | <i>Smyd4-4</i>     | SMYD  | <i>Papilio polytes</i>     |
| PpolytesGene0009103 | <i>Smyd4-4</i>     | SMYD  | <i>Papilio polytes</i>     |
| PpolytesGene0002500 | <i>Smyd5</i>       | SMYD  | <i>Papilio polytes</i>     |
| PpolytesGene0009185 | <i>SmydA-1</i>     | SmydA | <i>Papilio polytes</i>     |
| PpolytesGene0009252 | <i>SmydA-2</i>     | SmydA | <i>Papilio polytes</i>     |
| PpolytesGene0009269 | <i>SmydA-3</i>     | SmydA | <i>Papilio polytes</i>     |
| PpolytesGene0009184 | <i>SmydA-4</i>     | SmydA | <i>Papilio polytes</i>     |
| PpolytesGene0009251 | <i>SmydA-5</i>     | SmydA | <i>Papilio polytes</i>     |
| PpolytesGene0009274 | <i>SmydA-7</i>     | SmydA | <i>Papilio polytes</i>     |
| PpolytesGene0007698 | <i>SmydA-8</i>     | SmydA | <i>Papilio polytes</i>     |
| PpolytesGene0008985 | <i>suv</i>         | Suv   | <i>Papilio polytes</i>     |
| PpolytesGene0003883 | <i>trx</i>         | Trx   | <i>Papilio polytes</i>     |
| PpolytesGene0007426 | <i>upSET(MLL5)</i> | -     | <i>Papilio polytes</i>     |
| PxuthusGene0005385  | <i>ash1</i>        | Ash   | <i>Papilio xuthus</i>      |
| PxuthusGene0000342  | <i>Blimp-1</i>     | PRDM  | <i>Papilio xuthus</i>      |
| PxuthusGene0001006  | <i>egg</i>         | Suv   | <i>Papilio xuthus</i>      |
| PxuthusGene0003790  | <i>Ez</i>          | Ez    | <i>Papilio xuthus</i>      |
| PxuthusGene0007252  | <i>G9a</i>         | Suv   | <i>Papilio xuthus</i>      |
| PxuthusGene0001837  | <i>Hmt4-20</i>     | -     | <i>Papilio xuthus</i>      |
| PxuthusGene0007920  | <i>Mes-4</i>       | Ash   | <i>Papilio xuthus</i>      |
| PxuthusGene0006641  | <i>Set1</i>        | Trx   | <i>Papilio xuthus</i>      |
| PxuthusGene0006285  | <i>Set2</i>        | Ash   | <i>Papilio xuthus</i>      |
| PxuthusGene0006529  | <i>Set8</i>        | -     | <i>Papilio xuthus</i>      |
| PxuthusGene0003668  | <i>setd</i>        | SETD  | <i>Papilio xuthus</i>      |

|                    |                    |       |                                  |
|--------------------|--------------------|-------|----------------------------------|
| PxuthusGene0012605 | <i>Smyd4-1</i>     | SMYD  | <i>Papilio xuthus</i>            |
| PxuthusGene0009507 | <i>Smyd4-2</i>     | SMYD  | <i>Papilio xuthus</i>            |
| PxuthusGene0007183 | <i>Smyd4-3</i>     | SMYD  | <i>Papilio xuthus</i>            |
| PxuthusGene0011921 | <i>Smyd4-4</i>     | SMYD  | <i>Papilio xuthus</i>            |
| PxuthusGene0008942 | <i>Smyd4-4</i>     | SMYD  | <i>Papilio xuthus</i>            |
| PxuthusGene0003431 | <i>Smyd5</i>       | SMYD  | <i>Papilio xuthus</i>            |
| PxuthusGene0011724 | <i>SmydA-2</i>     | SmydA | <i>Papilio xuthus</i>            |
| PxuthusGene0011744 | <i>SmydA-3</i>     | SmydA | <i>Papilio xuthus</i>            |
| PxuthusGene0011655 | <i>SmydA-4</i>     | SmydA | <i>Papilio xuthus</i>            |
| PxuthusGene0011723 | <i>SmydA-5</i>     | SmydA | <i>Papilio xuthus</i>            |
| PxuthusGene0011749 | <i>SmydA-6</i>     | SmydA | <i>Papilio xuthus</i>            |
| PxuthusGene0006228 | <i>SmydA-8</i>     | SmydA | <i>Papilio xuthus</i>            |
| PxuthusGene0003277 | <i>Su(var)3-9</i>  | Suv   | <i>Papilio xuthus</i>            |
| PxuthusGene0006868 | <i>suv</i>         | Suv   | <i>Papilio xuthus</i>            |
| PxuthusGene0008105 | <i>trr</i>         | Trx   | <i>Papilio xuthus</i>            |
| PxuthusGene0000539 | <i>upSET(MLL5)</i> | -     | <i>Papilio xuthus</i>            |
| PTEP002912         | -                  | -     | <i>Parasteatoda tepidariorum</i> |
| PTEP002422         | <i>ash1</i>        | Ash   | <i>Parasteatoda tepidariorum</i> |
| PTEP023170         | <i>Blimp-1</i>     | PRDM  | <i>Parasteatoda tepidariorum</i> |
| PTEP012295         | <i>Blimp-1</i>     | PRDM  | <i>Parasteatoda tepidariorum</i> |
| PTEP012300         | <i>Blimp-1</i>     | PRDM  | <i>Parasteatoda tepidariorum</i> |
| PTEP012301         | <i>Blimp-1</i>     | PRDM  | <i>Parasteatoda tepidariorum</i> |
| PTEP019733         | <i>Blimp-1</i>     | PRDM  | <i>Parasteatoda tepidariorum</i> |
| PTEP020724         | <i>Blimp-1</i>     | PRDM  | <i>Parasteatoda tepidariorum</i> |
| PTEP020725         | <i>Blimp-1</i>     | PRDM  | <i>Parasteatoda tepidariorum</i> |
| PTEP020733         | <i>Blimp-1</i>     | PRDM  | <i>Parasteatoda tepidariorum</i> |
| PTEP028424         | <i>Blimp-1</i>     | PRDM  | <i>Parasteatoda tepidariorum</i> |
| PTEP028799         | <i>Blimp-1</i>     | PRDM  | <i>Parasteatoda tepidariorum</i> |
| PTEP010963         | <i>egg</i>         | Suv   | <i>Parasteatoda tepidariorum</i> |
| PTEP025196         | <i>Ez</i>          | Ez    | <i>Parasteatoda tepidariorum</i> |
| PTEP000605         | <i>G9a</i>         | Suv   | <i>Parasteatoda tepidariorum</i> |
| PTEP004339         | <i>G9a</i>         | Suv   | <i>Parasteatoda tepidariorum</i> |
| PTEP013699         | <i>Hmt4-20</i>     | -     | <i>Parasteatoda tepidariorum</i> |
| PTEP015414         | <i>Mes-4</i>       | Ash   | <i>Parasteatoda tepidariorum</i> |
| PTEP000233         | <i>Mes-4</i>       | Ash   | <i>Parasteatoda tepidariorum</i> |
| PTEP017281         | <i>Set1</i>        | Trx   | <i>Parasteatoda tepidariorum</i> |
| PTEP003651         | <i>Set2</i>        | Ash   | <i>Parasteatoda tepidariorum</i> |
| PTEP012349         | <i>Set2</i>        | Ash   | <i>Parasteatoda tepidariorum</i> |
| PTEP022231         | <i>Set8</i>        | -     | <i>Parasteatoda tepidariorum</i> |
| PTEP010279         | <i>setd</i>        | SETD  | <i>Parasteatoda tepidariorum</i> |
| PTEP006874         | <i>Smyd3</i>       | SMYD  | <i>Parasteatoda tepidariorum</i> |
| PTEP017494         | <i>Su(var)3-9</i>  | Suv   | <i>Parasteatoda tepidariorum</i> |
| PTEP012357         | <i>suv</i>         | Suv   | <i>Parasteatoda tepidariorum</i> |
| PTEP020401         | <i>trr</i>         | Trx   | <i>Parasteatoda tepidariorum</i> |

|            |                    |       |                                  |
|------------|--------------------|-------|----------------------------------|
| PTEP006665 | <i>trx</i>         | Trx   | <i>Parasteatoda tepidariorum</i> |
| PHUM191320 | -                  | -     | <i>Pediculus humanus</i>         |
| PHUM244720 | <i>ash1</i>        | Ash   | <i>Pediculus humanus</i>         |
| PHUM607020 | <i>Blimp-1</i>     | PRDM  | <i>Pediculus humanus</i>         |
| PHUM415050 | <i>egg</i>         | Suv   | <i>Pediculus humanus</i>         |
| PHUM294210 | <i>Ez</i>          | Ez    | <i>Pediculus humanus</i>         |
| PHUM447810 | <i>G9a</i>         | Suv   | <i>Pediculus humanus</i>         |
| PHUM503290 | <i>Hmt4-20</i>     | -     | <i>Pediculus humanus</i>         |
| PHUM433670 | <i>Mes-4</i>       | Ash   | <i>Pediculus humanus</i>         |
| PHUM240750 | <i>Set1</i>        | Trx   | <i>Pediculus humanus</i>         |
| PHUM463920 | <i>Set2</i>        | Ash   | <i>Pediculus humanus</i>         |
| PHUM315980 | <i>Set8</i>        | -     | <i>Pediculus humanus</i>         |
| PHUM131480 | <i>setd</i>        | SETD  | <i>Pediculus humanus</i>         |
| PHUM489090 | <i>Smyd3</i>       | SMYD  | <i>Pediculus humanus</i>         |
| PHUM212930 | <i>Smyd4-3</i>     | SMYD  | <i>Pediculus humanus</i>         |
| PHUM132280 | <i>Smyd4-3</i>     | SMYD  | <i>Pediculus humanus</i>         |
| PHUM126850 | <i>Smyd4-4</i>     | SMYD  | <i>Pediculus humanus</i>         |
| PHUM105860 | <i>Smyd5</i>       | SMYD  | <i>Pediculus humanus</i>         |
| PHUM105850 | <i>Smyd5</i>       | SMYD  | <i>Pediculus humanus</i>         |
| PHUM128680 | <i>SmydA-2</i>     | SmydA | <i>Pediculus humanus</i>         |
| PHUM472490 | <i>SmydA-3</i>     | SmydA | <i>Pediculus humanus</i>         |
| PHUM331980 | <i>SmydA-4</i>     | SmydA | <i>Pediculus humanus</i>         |
| PHUM472480 | <i>SmydA-4</i>     | SmydA | <i>Pediculus humanus</i>         |
| PHUM128690 | <i>SmydA-5</i>     | SmydA | <i>Pediculus humanus</i>         |
| PHUM423590 | <i>Su(var)3-9</i>  | Suv   | <i>Pediculus humanus</i>         |
| PHUM451270 | <i>suv</i>         | Suv   | <i>Pediculus humanus</i>         |
| PHUM411800 | <i>trr</i>         | Trx   | <i>Pediculus humanus</i>         |
| PHUM079870 | <i>trx</i>         | Trx   | <i>Pediculus humanus</i>         |
| PHUM494030 | <i>upSET(MLL5)</i> | -     | <i>Pediculus humanus</i>         |
| PPAI004765 | <i>ash1</i>        | Ash   | <i>Phlebotomus papatasi</i>      |
| PPAI009638 | <i>egg</i>         | Suv   | <i>Phlebotomus papatasi</i>      |
| PPAI008768 | <i>Ez</i>          | Ez    | <i>Phlebotomus papatasi</i>      |
| PPAI004354 | <i>G9a</i>         | Suv   | <i>Phlebotomus papatasi</i>      |
| PPAI004950 | <i>Mes-4</i>       | Ash   | <i>Phlebotomus papatasi</i>      |
| PPAI008303 | <i>Set1</i>        | Trx   | <i>Phlebotomus papatasi</i>      |
| PPAI003533 | <i>Set2</i>        | Ash   | <i>Phlebotomus papatasi</i>      |
| PPAI008613 | <i>Set2</i>        | Ash   | <i>Phlebotomus papatasi</i>      |
| PPAI006291 | <i>Set8</i>        | -     | <i>Phlebotomus papatasi</i>      |
| PPAI009538 | <i>setd</i>        | SETD  | <i>Phlebotomus papatasi</i>      |
| PPAI011158 | <i>Smyd3</i>       | SMYD  | <i>Phlebotomus papatasi</i>      |
| PPAI003744 | <i>Smyd4-1</i>     | SMYD  | <i>Phlebotomus papatasi</i>      |
| PPAI000197 | <i>Smyd4-2</i>     | SMYD  | <i>Phlebotomus papatasi</i>      |
| PPAI003136 | <i>Smyd4-3</i>     | SMYD  | <i>Phlebotomus papatasi</i>      |
| PPAI005666 | <i>Smyd5</i>       | SMYD  | <i>Phlebotomus papatasi</i>      |

|            |                   |       |                             |
|------------|-------------------|-------|-----------------------------|
| PPAI003492 | <i>SmydA-1</i>    | SmydA | <i>Phlebotomus papatasi</i> |
| PPAI002804 | <i>SmydA-2</i>    | SmydA | <i>Phlebotomus papatasi</i> |
| PPAI003320 | <i>SmydA-3</i>    | SmydA | <i>Phlebotomus papatasi</i> |
| PPAI003491 | <i>SmydA-4</i>    | SmydA | <i>Phlebotomus papatasi</i> |
| PPAI002546 | <i>SmydA-8</i>    | SmydA | <i>Phlebotomus papatasi</i> |
| PPAI008878 | <i>suv</i>        | Suv   | <i>Phlebotomus papatasi</i> |
| PPAI005537 | <i>trr</i>        | Trx   | <i>Phlebotomus papatasi</i> |
| PPAI007688 | <i>trx</i>        | Trx   | <i>Phlebotomus papatasi</i> |
| Px003149.1 | -                 | -     | <i>Plutella xylostella</i>  |
| Px012028.1 | -                 | -     | <i>Plutella xylostella</i>  |
| Px012304.1 | <i>ash1</i>       | Ash   | <i>Plutella xylostella</i>  |
| Px011637.1 | <i>Blimp-1</i>    | PRDM  | <i>Plutella xylostella</i>  |
| Px010030.1 | <i>egg</i>        | Suv   | <i>Plutella xylostella</i>  |
| Px012884.1 | <i>egg</i>        | Suv   | <i>Plutella xylostella</i>  |
| Px012980.1 | <i>G9a</i>        | Suv   | <i>Plutella xylostella</i>  |
| Px002764.1 | <i>G9a</i>        | Suv   | <i>Plutella xylostella</i>  |
| Px008524.1 | <i>Mes-4</i>      | Ash   | <i>Plutella xylostella</i>  |
| Px008525.1 | <i>Mes-4</i>      | Ash   | <i>Plutella xylostella</i>  |
| Px013558.1 | <i>Set1</i>       | Trx   | <i>Plutella xylostella</i>  |
| Px014783.1 | <i>Set1</i>       | Trx   | <i>Plutella xylostella</i>  |
| Px003495.1 | <i>Set2</i>       | Ash   | <i>Plutella xylostella</i>  |
| Px013563.1 | <i>Set8</i>       | -     | <i>Plutella xylostella</i>  |
| Px002036.1 | <i>setd</i>       | SETD  | <i>Plutella xylostella</i>  |
| Px002038.1 | <i>setd</i>       | SETD  | <i>Plutella xylostella</i>  |
| Px006948.1 | <i>setd</i>       | SETD  | <i>Plutella xylostella</i>  |
| Px006949.1 | <i>setd</i>       | SETD  | <i>Plutella xylostella</i>  |
| Px001474.1 | <i>Smyd4-1</i>    | SMYD  | <i>Plutella xylostella</i>  |
| Px002177.2 | <i>Smyd4-2</i>    | SMYD  | <i>Plutella xylostella</i>  |
| Px008749.1 | <i>Smyd4-3</i>    | SMYD  | <i>Plutella xylostella</i>  |
| Px012029.1 | <i>Smyd4-4</i>    | SMYD  | <i>Plutella xylostella</i>  |
| Px009260.1 | <i>Smyd4-4</i>    | SMYD  | <i>Plutella xylostella</i>  |
| Px001029.1 | <i>SmydA-1</i>    | SmydA | <i>Plutella xylostella</i>  |
| Px015362.1 | <i>SmydA-1</i>    | SmydA | <i>Plutella xylostella</i>  |
| Px007787.2 | <i>SmydA-2</i>    | SmydA | <i>Plutella xylostella</i>  |
| Px007644.1 | <i>SmydA-3</i>    | SmydA | <i>Plutella xylostella</i>  |
| Px015361.3 | <i>SmydA-4</i>    | SmydA | <i>Plutella xylostella</i>  |
| Px003408.1 | <i>SmydA-4</i>    | SmydA | <i>Plutella xylostella</i>  |
| Px007788.1 | <i>SmydA-5</i>    | SmydA | <i>Plutella xylostella</i>  |
| Px007648.2 | <i>SmydA-6</i>    | SmydA | <i>Plutella xylostella</i>  |
| Px014557.1 | <i>SmydA-8</i>    | SmydA | <i>Plutella xylostella</i>  |
| Px011535.1 | <i>Su(var)3-9</i> | Suv   | <i>Plutella xylostella</i>  |
| Px000378.1 | <i>trr</i>        | Trx   | <i>Plutella xylostella</i>  |
| Px000383.1 | <i>trr</i>        | Trx   | <i>Plutella xylostella</i>  |
| Px009181.1 | <i>trr</i>        | Trx   | <i>Plutella xylostella</i>  |



|                |                    |       |                              |
|----------------|--------------------|-------|------------------------------|
| Px015073.1     | <i>trx</i>         | Trx   | <i>Plutella xylostella</i>   |
| Px014006.5     | <i>upSET(MLL5)</i> | -     | <i>Plutella xylostella</i>   |
| PB19591        | -                  | -     | <i>Pogonomyrmex barbatus</i> |
| PB21545        | <i>egg</i>         | Suv   | <i>Pogonomyrmex barbatus</i> |
| PB17647        | <i>Ez</i>          | Ez    | <i>Pogonomyrmex barbatus</i> |
| PB16229        | <i>G9a</i>         | Suv   | <i>Pogonomyrmex barbatus</i> |
| PB19450        | <i>Hmt4-20</i>     | -     | <i>Pogonomyrmex barbatus</i> |
| PB21188        | <i>Mes-4</i>       | Ash   | <i>Pogonomyrmex barbatus</i> |
| PB20646        | <i>Set1</i>        | Trx   | <i>Pogonomyrmex barbatus</i> |
| PB15902        | <i>Set2</i>        | Ash   | <i>Pogonomyrmex barbatus</i> |
| PB18656        | <i>Set8</i>        | -     | <i>Pogonomyrmex barbatus</i> |
| PB17917        | <i>setd</i>        | SETD  | <i>Pogonomyrmex barbatus</i> |
| PB17920        | <i>setd</i>        | SETD  | <i>Pogonomyrmex barbatus</i> |
| PB17474        | <i>Smyd4-1</i>     | SMYD  | <i>Pogonomyrmex barbatus</i> |
| PB19875        | <i>Smyd4-2</i>     | SMYD  | <i>Pogonomyrmex barbatus</i> |
| PB11858        | <i>Smyd4-3</i>     | SMYD  | <i>Pogonomyrmex barbatus</i> |
| PB22652        | <i>Smyd4-3</i>     | SMYD  | <i>Pogonomyrmex barbatus</i> |
| PB12085        | <i>Smyd5</i>       | SMYD  | <i>Pogonomyrmex barbatus</i> |
| PB21709        | <i>SmydA-3</i>     | SmydA | <i>Pogonomyrmex barbatus</i> |
| PB21710        | <i>SmydA-4</i>     | SmydA | <i>Pogonomyrmex barbatus</i> |
| PB18400        | <i>SmydA-5</i>     | SmydA | <i>Pogonomyrmex barbatus</i> |
| PB25817        | <i>SmydA-8</i>     | SmydA | <i>Pogonomyrmex barbatus</i> |
| PB17547        | <i>Su(var)3-9</i>  | Suv   | <i>Pogonomyrmex barbatus</i> |
| PB16645        | <i>suv</i>         | Suv   | <i>Pogonomyrmex barbatus</i> |
| PB12022        | <i>trr</i>         | Trx   | <i>Pogonomyrmex barbatus</i> |
| PB13115        | <i>trx</i>         | Trx   | <i>Pogonomyrmex barbatus</i> |
| PB20519        | <i>upSET(MLL5)</i> | -     | <i>Pogonomyrmex barbatus</i> |
| XP_015191195.1 | <i>Blimp-1</i>     | PRDM  | <i>Polistes dominula</i>     |
| XP_015185231.1 | <i>egg</i>         | Suv   | <i>Polistes dominula</i>     |
| XP_015189397.1 | <i>Ez</i>          | Ez    | <i>Polistes dominula</i>     |
| XP_015177385.1 | <i>G9a</i>         | Suv   | <i>Polistes dominula</i>     |
| XP_015178802.1 | <i>Hmt4-20</i>     | -     | <i>Polistes dominula</i>     |
| XP_015186803.1 | <i>Set2</i>        | Ash   | <i>Polistes dominula</i>     |
| XP_015188928.1 | <i>Set8</i>        | -     | <i>Polistes dominula</i>     |
| XP_015176838.1 | <i>setd</i>        | SETD  | <i>Polistes dominula</i>     |
| XP_015181174.1 | <i>Smyd4-2</i>     | SMYD  | <i>Polistes dominula</i>     |
| XP_015176876.1 | <i>Smyd4-2</i>     | SMYD  | <i>Polistes dominula</i>     |
| XP_015187287.1 | <i>Smyd4-3</i>     | SMYD  | <i>Polistes dominula</i>     |
| XP_015175405.1 | <i>Smyd4-3</i>     | SMYD  | <i>Polistes dominula</i>     |
| XP_015177541.1 | <i>Smyd4-3</i>     | SMYD  | <i>Polistes dominula</i>     |
| XP_015185089.1 | <i>Smyd5</i>       | SMYD  | <i>Polistes dominula</i>     |
| XP_015179499.1 | <i>SmydA-3</i>     | SmydA | <i>Polistes dominula</i>     |
| XP_015175183.1 | <i>SmydA-4</i>     | SmydA | <i>Polistes dominula</i>     |
| XP_015178450.1 | <i>SmydA-5</i>     | SmydA | <i>Polistes dominula</i>     |

|                |                   |       |                           |
|----------------|-------------------|-------|---------------------------|
| XP_015174257.1 | <i>SmydA-8</i>    | SmydA | <i>Polistes dominula</i>  |
| XP_015174103.1 | <i>Su(var)3-9</i> | Suv   | <i>Polistes dominula</i>  |
| XP_015190270.1 | <i>suv</i>        | Suv   | <i>Polistes dominula</i>  |
| XP_015177420.1 | <i>trr</i>        | Trx   | <i>Polistes dominula</i>  |
| XP_015187057.1 | <i>trx</i>        | Trx   | <i>Polistes dominula</i>  |
| RPRC001120     | <i>ash1</i>       | Ash   | <i>Rhodnius prolixus</i>  |
| RPRC009085     | <i>Ez</i>         | Ez    | <i>Rhodnius prolixus</i>  |
| RPRC003115     | <i>G9a</i>        | Suv   | <i>Rhodnius prolixus</i>  |
| RPRC002749     | <i>Hmt4-20</i>    | -     | <i>Rhodnius prolixus</i>  |
| RPRC001493     | <i>Set1</i>       | Trx   | <i>Rhodnius prolixus</i>  |
| RPRC001422     | <i>Set2</i>       | Ash   | <i>Rhodnius prolixus</i>  |
| RPRC006378     | <i>Set8</i>       | -     | <i>Rhodnius prolixus</i>  |
| RPRC001600     | <i>setd</i>       | SETD  | <i>Rhodnius prolixus</i>  |
| RPRC003722     | <i>Smyd3</i>      | SMYD  | <i>Rhodnius prolixus</i>  |
| RPRC005705     | <i>Smyd4-2</i>    | SMYD  | <i>Rhodnius prolixus</i>  |
| RPRC010144     | <i>Smyd4-3</i>    | SMYD  | <i>Rhodnius prolixus</i>  |
| RPRC012281     | <i>Smyd4-3</i>    | SMYD  | <i>Rhodnius prolixus</i>  |
| RPRC014880     | <i>Smyd4-4</i>    | SMYD  | <i>Rhodnius prolixus</i>  |
| RPRC003079     | <i>Smyd5</i>      | SMYD  | <i>Rhodnius prolixus</i>  |
| RPRC010307     | <i>SmydA-1</i>    | SmydA | <i>Rhodnius prolixus</i>  |
| RPRC008683     | <i>SmydA-3</i>    | SmydA | <i>Rhodnius prolixus</i>  |
| RPRC010311     | <i>SmydA-4</i>    | SmydA | <i>Rhodnius prolixus</i>  |
| RPRC001060     | <i>SmydA-5</i>    | SmydA | <i>Rhodnius prolixus</i>  |
| RPRC013812     | <i>suv</i>        | Suv   | <i>Rhodnius prolixus</i>  |
| RPRC003178     | <i>trr</i>        | Trx   | <i>Rhodnius prolixus</i>  |
| KPM10847.1     | <i>ash1</i>       | Ash   | <i>Sarcoptes scabiei</i>  |
| KPM10339.1     | <i>Blimp-1</i>    | PRDM  | <i>Sarcoptes scabiei</i>  |
| KPM04871.1     | <i>egg</i>        | Suv   | <i>Sarcoptes scabiei</i>  |
| KPM09905.1     | <i>Ez</i>         | Ez    | <i>Sarcoptes scabiei</i>  |
| KPM04996.1     | <i>Hmt4-20</i>    | -     | <i>Sarcoptes scabiei</i>  |
| KPM03216.1     | <i>Mes-4</i>      | Ash   | <i>Sarcoptes scabiei</i>  |
| KPM04444.1     | <i>Set1</i>       | Trx   | <i>Sarcoptes scabiei</i>  |
| KPM10660.1     | <i>Set2</i>       | Ash   | <i>Sarcoptes scabiei</i>  |
| KPM10949.1     | <i>Set8</i>       | -     | <i>Sarcoptes scabiei</i>  |
| KPM04695.1     | <i>Smyd3</i>      | SMYD  | <i>Sarcoptes scabiei</i>  |
| KPM05877.1     | <i>Smyd3</i>      | SMYD  | <i>Sarcoptes scabiei</i>  |
| KPM11104.1     | <i>Smyd3</i>      | SMYD  | <i>Sarcoptes scabiei</i>  |
| KPM06712.1     | <i>Smyd4-3</i>    | SMYD  | <i>Sarcoptes scabiei</i>  |
| KPM06989.1     | <i>Smyd4-3</i>    | SMYD  | <i>Sarcoptes scabiei</i>  |
| KPM03385.1     | <i>Smyd5</i>      | SMYD  | <i>Sarcoptes scabiei</i>  |
| KPM05617.1     | <i>Smyd5</i>      | SMYD  | <i>Sarcoptes scabiei</i>  |
| KPL93604.1     | <i>trr</i>        | Trx   | <i>Sarcoptes scabiei</i>  |
| SI2.2.0_12919  | -                 | -     | <i>Solenopsis invicta</i> |
| SI2.2.0_07690  | <i>ash1</i>       | Ash   | <i>Solenopsis invicta</i> |

|               |                    |       |                              |
|---------------|--------------------|-------|------------------------------|
| SI2.2.0_00981 | <i>egg</i>         | Suv   | <i>Solenopsis invicta</i>    |
| SI2.2.0_09656 | <i>Ez</i>          | Ez    | <i>Solenopsis invicta</i>    |
| SI2.2.0_06678 | <i>Mes-4</i>       | Ash   | <i>Solenopsis invicta</i>    |
| SI2.2.0_14637 | <i>Set1</i>        | Trx   | <i>Solenopsis invicta</i>    |
| SI2.2.0_04653 | <i>Set2</i>        | Ash   | <i>Solenopsis invicta</i>    |
| SI2.2.0_02694 | <i>Set8</i>        | -     | <i>Solenopsis invicta</i>    |
| SI2.2.0_15998 | <i>setd</i>        | SETD  | <i>Solenopsis invicta</i>    |
| SI2.2.0_02250 | <i>Smyd4-3</i>     | SMYD  | <i>Solenopsis invicta</i>    |
| SI2.2.0_10758 | <i>Smyd5</i>       | SMYD  | <i>Solenopsis invicta</i>    |
| SI2.2.0_08812 | <i>SmydA-3</i>     | SmydA | <i>Solenopsis invicta</i>    |
| SI2.2.0_10209 | <i>SmydA-4</i>     | SmydA | <i>Solenopsis invicta</i>    |
| SI2.2.0_07869 | <i>SmydA-5</i>     | SmydA | <i>Solenopsis invicta</i>    |
| SI2.2.0_09986 | <i>SmydA-8</i>     | SmydA | <i>Solenopsis invicta</i>    |
| SI2.2.0_12284 | <i>Su(var)3-9</i>  | Suv   | <i>Solenopsis invicta</i>    |
| SI2.2.0_00751 | <i>suv</i>         | Suv   | <i>Solenopsis invicta</i>    |
| SI2.2.0_09282 | <i>trr</i>         | Trx   | <i>Solenopsis invicta</i>    |
| SI2.2.0_07789 | <i>trx</i>         | Trx   | <i>Solenopsis invicta</i>    |
| SI2.2.0_04884 | <i>upSET(MLL5)</i> | -     | <i>Solenopsis invicta</i>    |
| KFM72222.1    | -                  | -     | <i>Stegodyphus mimosarum</i> |
| KFM81063.1    | -                  | -     | <i>Stegodyphus mimosarum</i> |
| KFM82051.1    | -                  | -     | <i>Stegodyphus mimosarum</i> |
| KFM74571.1    | <i>ash1</i>        | Ash   | <i>Stegodyphus mimosarum</i> |
| KFM78153.1    | <i>Blimp-1</i>     | PRDM  | <i>Stegodyphus mimosarum</i> |
| KFM76516.1    | <i>Blimp-1</i>     | PRDM  | <i>Stegodyphus mimosarum</i> |
| KFM77550.1    | <i>egg</i>         | Suv   | <i>Stegodyphus mimosarum</i> |
| KFM67407.1    | <i>Ez</i>          | Ez    | <i>Stegodyphus mimosarum</i> |
| KFM59010.1    | <i>G9a</i>         | Suv   | <i>Stegodyphus mimosarum</i> |
| KFM73887.1    | <i>G9a</i>         | Suv   | <i>Stegodyphus mimosarum</i> |
| KFM79732.1    | <i>Hmt4-20</i>     | -     | <i>Stegodyphus mimosarum</i> |
| KFM70139.1    | <i>Hmt4-20</i>     | -     | <i>Stegodyphus mimosarum</i> |
| KFM62539.1    | <i>Mes-4</i>       | Ash   | <i>Stegodyphus mimosarum</i> |
| KFM77664.1    | <i>Set1</i>        | Trx   | <i>Stegodyphus mimosarum</i> |
| KFM70004.1    | <i>Set2</i>        | Ash   | <i>Stegodyphus mimosarum</i> |
| KFM72722.1    | <i>Set8</i>        | -     | <i>Stegodyphus mimosarum</i> |
| KFM79046.1    | <i>setd</i>        | SETD  | <i>Stegodyphus mimosarum</i> |
| KFM79258.1    | <i>Smyd3</i>       | SMYD  | <i>Stegodyphus mimosarum</i> |
| KFM73274.1    | <i>Smyd4-3</i>     | SMYD  | <i>Stegodyphus mimosarum</i> |
| KFM65223.1    | <i>Smyd5</i>       | SMYD  | <i>Stegodyphus mimosarum</i> |
| KFM59720.1    | <i>suv</i>         | Suv   | <i>Stegodyphus mimosarum</i> |
| KFM63416.1    | <i>trr</i>         | Trx   | <i>Stegodyphus mimosarum</i> |
| SCAU010542    | -                  | -     | <i>Stomoxys calcitrans</i>   |
| SCAU008949    | -                  | -     | <i>Stomoxys calcitrans</i>   |
| SCAU008374    | <i>ash1</i>        | Ash   | <i>Stomoxys calcitrans</i>   |
| SCAU008763    | <i>Blimp-1</i>     | PRDM  | <i>Stomoxys calcitrans</i>   |

|            |                    |       |                            |
|------------|--------------------|-------|----------------------------|
| SCAU004069 | <i>egg</i>         | Suv   | <i>Stomoxys calcitrans</i> |
| SCAU005606 | <i>Ez</i>          | Ez    | <i>Stomoxys calcitrans</i> |
| SCAU001322 | <i>G9a</i>         | Suv   | <i>Stomoxys calcitrans</i> |
| SCAU006850 | <i>Hmt4-20</i>     | -     | <i>Stomoxys calcitrans</i> |
| SCAU008248 | <i>Mes-4</i>       | Ash   | <i>Stomoxys calcitrans</i> |
| SCAU012005 | <i>Set1</i>        | Trx   | <i>Stomoxys calcitrans</i> |
| SCAU003593 | <i>Set2</i>        | Ash   | <i>Stomoxys calcitrans</i> |
| SCAU009186 | <i>Set8</i>        | -     | <i>Stomoxys calcitrans</i> |
| SCAU014524 | <i>setd</i>        | SETD  | <i>Stomoxys calcitrans</i> |
| SCAU006212 | <i>Smyd4-1</i>     | SMYD  | <i>Stomoxys calcitrans</i> |
| SCAU000793 | <i>Smyd4-2</i>     | SMYD  | <i>Stomoxys calcitrans</i> |
| SCAU016375 | <i>Smyd4-3</i>     | SMYD  | <i>Stomoxys calcitrans</i> |
| SCAU005169 | <i>Smyd4-4</i>     | SMYD  | <i>Stomoxys calcitrans</i> |
| SCAU008975 | <i>Smyd5</i>       | SMYD  | <i>Stomoxys calcitrans</i> |
| SCAU007742 | <i>SmydA-1</i>     | SmydA | <i>Stomoxys calcitrans</i> |
| SCAU015663 | <i>SmydA-2</i>     | SmydA | <i>Stomoxys calcitrans</i> |
| SCAU008859 | <i>SmydA-3</i>     | SmydA | <i>Stomoxys calcitrans</i> |
| SCAU003400 | <i>SmydA-4</i>     | SmydA | <i>Stomoxys calcitrans</i> |
| SCAU005082 | <i>SmydA-5</i>     | SmydA | <i>Stomoxys calcitrans</i> |
| SCAU000935 | <i>SmydA-6</i>     | SmydA | <i>Stomoxys calcitrans</i> |
| SCAU010581 | <i>SmydA-6</i>     | SmydA | <i>Stomoxys calcitrans</i> |
| SCAU011677 | <i>SmydA-6</i>     | SmydA | <i>Stomoxys calcitrans</i> |
| SCAU004225 | <i>SmydA-7</i>     | SmydA | <i>Stomoxys calcitrans</i> |
| SCAU010775 | <i>SmydA-8</i>     | SmydA | <i>Stomoxys calcitrans</i> |
| SCAU006646 | <i>SmydA-9</i>     | SmydA | <i>Stomoxys calcitrans</i> |
| SCAU007743 | <i>trr</i>         | Trx   | <i>Stomoxys calcitrans</i> |
| SCAU008744 | <i>trx</i>         | Trx   | <i>Stomoxys calcitrans</i> |
| SCAU009601 | <i>upSET(MLL5)</i> | -     | <i>Stomoxys calcitrans</i> |
| 03g02610   | <i>ash1</i>        | Ash   | <i>Tetranychus urticae</i> |
| 15g00080   | <i>Blimp-1</i>     | PRDM  | <i>Tetranychus urticae</i> |
| 03g02220   | <i>egg</i>         | Suv   | <i>Tetranychus urticae</i> |
| 07g01000   | <i>egg</i>         | Suv   | <i>Tetranychus urticae</i> |
| 28g01660   | <i>egg</i>         | Suv   | <i>Tetranychus urticae</i> |
| 05g08610   | <i>Ez</i>          | Ez    | <i>Tetranychus urticae</i> |
| 15g02370   | <i>Ez</i>          | Ez    | <i>Tetranychus urticae</i> |
| 02g11280   | <i>Hmt4-20</i>     | -     | <i>Tetranychus urticae</i> |
| 02g03670   | <i>Mes-4</i>       | Ash   | <i>Tetranychus urticae</i> |
| 07g03190   | <i>Set1</i>        | Trx   | <i>Tetranychus urticae</i> |
| 15g00050   | <i>Set2</i>        | Ash   | <i>Tetranychus urticae</i> |
| 20g02320   | <i>Set8</i>        | -     | <i>Tetranychus urticae</i> |
| 20g02380   | <i>Set8</i>        | -     | <i>Tetranychus urticae</i> |
| 07g04000   | <i>setd</i>        | SETD  | <i>Tetranychus urticae</i> |
| 12g03090   | <i>Smyd3</i>       | SMYD  | <i>Tetranychus urticae</i> |
| 02g04130   | <i>Smyd4-2</i>     | SMYD  | <i>Tetranychus urticae</i> |

|              |                   |      |                               |
|--------------|-------------------|------|-------------------------------|
| 04g03960     | <i>Smyd4-2</i>    | SMYD | <i>Tetranychus urticae</i>    |
| 06g06280     | <i>Smyd4-2</i>    | SMYD | <i>Tetranychus urticae</i>    |
| 06g06270     | <i>Smyd4-3</i>    | SMYD | <i>Tetranychus urticae</i>    |
| 08g00440     | <i>Smyd4-3</i>    | SMYD | <i>Tetranychus urticae</i>    |
| 02g06270     | <i>Smyd4-4</i>    | SMYD | <i>Tetranychus urticae</i>    |
| 04g08120     | <i>Su(var)3-9</i> | Suv  | <i>Tetranychus urticae</i>    |
| 17g01640     | <i>trr</i>        | Trx  | <i>Tetranychus urticae</i>    |
| TCALIF_00296 | -                 | -    | <i>Tigriopus californicus</i> |
| TCALIF_00673 | -                 | -    | <i>Tigriopus californicus</i> |
| TCALIF_00901 | -                 | -    | <i>Tigriopus californicus</i> |
| TCALIF_06487 | -                 | -    | <i>Tigriopus californicus</i> |
| TCALIF_07919 | -                 | -    | <i>Tigriopus californicus</i> |
| TCALIF_08703 | -                 | -    | <i>Tigriopus californicus</i> |
| TCALIF_09504 | -                 | -    | <i>Tigriopus californicus</i> |
| TCALIF_10816 | -                 | -    | <i>Tigriopus californicus</i> |
| TCALIF_13437 | -                 | -    | <i>Tigriopus californicus</i> |
| TCALIF_04842 | -                 | -    | <i>Tigriopus californicus</i> |
| TCALIF_08427 | -                 | -    | <i>Tigriopus californicus</i> |
| TCALIF_08822 | -                 | -    | <i>Tigriopus californicus</i> |
| TCALIF_11522 | -                 | -    | <i>Tigriopus californicus</i> |
| TCALIF_02232 | -                 | -    | <i>Tigriopus californicus</i> |
| TCALIF_03221 | -                 | -    | <i>Tigriopus californicus</i> |
| TCALIF_03641 | -                 | -    | <i>Tigriopus californicus</i> |
| TCALIF_03794 | -                 | -    | <i>Tigriopus californicus</i> |
| TCALIF_05025 | -                 | -    | <i>Tigriopus californicus</i> |
| TCALIF_08162 | -                 | -    | <i>Tigriopus californicus</i> |
| TCALIF_11823 | -                 | -    | <i>Tigriopus californicus</i> |
| TCALIF_12339 | -                 | -    | <i>Tigriopus californicus</i> |
| TCALIF_12461 | -                 | -    | <i>Tigriopus californicus</i> |
| TCALIF_12483 | -                 | -    | <i>Tigriopus californicus</i> |
| TCALIF_03449 | <i>ash1</i>       | Ash  | <i>Tigriopus californicus</i> |
| TCALIF_10212 | <i>Blimp-1</i>    | PRDM | <i>Tigriopus californicus</i> |
| TCALIF_09221 | <i>egg</i>        | Suv  | <i>Tigriopus californicus</i> |
| TCALIF_01325 | <i>Ez</i>         | Ez   | <i>Tigriopus californicus</i> |
| TCALIF_11585 | <i>G9a</i>        | Suv  | <i>Tigriopus californicus</i> |
| TCALIF_11332 | <i>Hmt4-20</i>    | -    | <i>Tigriopus californicus</i> |
| TCALIF_05036 | <i>Mes-4</i>      | Ash  | <i>Tigriopus californicus</i> |
| TCALIF_08908 | <i>Set1</i>       | Trx  | <i>Tigriopus californicus</i> |
| TCALIF_02122 | <i>Set2</i>       | Ash  | <i>Tigriopus californicus</i> |
| TCALIF_01201 | <i>Set8</i>       | -    | <i>Tigriopus californicus</i> |
| TCALIF_09968 | <i>Set8</i>       | -    | <i>Tigriopus californicus</i> |
| TCALIF_04636 | <i>Smyd3</i>      | SMYD | <i>Tigriopus californicus</i> |
| TCALIF_08718 | <i>Smyd4-2</i>    | SMYD | <i>Tigriopus californicus</i> |
| TCALIF_01669 | <i>Smyd4-2</i>    | SMYD | <i>Tigriopus californicus</i> |

|               |                    |       |                               |
|---------------|--------------------|-------|-------------------------------|
| TCALIF_02034  | <i>Smyd4-2</i>     | SMYD  | <i>Tigriopus californicus</i> |
| TCALIF_08951  | <i>Smyd4-3</i>     | SMYD  | <i>Tigriopus californicus</i> |
| TCALIF_00745  | <i>Smyd4-3</i>     | SMYD  | <i>Tigriopus californicus</i> |
| TCALIF_03792  | <i>Smyd4-3</i>     | SMYD  | <i>Tigriopus californicus</i> |
| TCALIF_06026  | <i>Smyd4-3</i>     | SMYD  | <i>Tigriopus californicus</i> |
| TCALIF_07236  | <i>Smyd4-3</i>     | SMYD  | <i>Tigriopus californicus</i> |
| TCALIF_07774  | <i>Smyd4-3</i>     | SMYD  | <i>Tigriopus californicus</i> |
| TCALIF_09013  | <i>Smyd4-3</i>     | SMYD  | <i>Tigriopus californicus</i> |
| TCALIF_10785  | <i>Smyd4-3</i>     | SMYD  | <i>Tigriopus californicus</i> |
| TCALIF_11285  | <i>Smyd4-3</i>     | SMYD  | <i>Tigriopus californicus</i> |
| TCALIF_00173  | <i>Smyd5</i>       | SMYD  | <i>Tigriopus californicus</i> |
| TCALIF_05643  | <i>SmydA-1</i>     | SmydA | <i>Tigriopus californicus</i> |
| TCALIF_02745  | <i>SmydA-2</i>     | SmydA | <i>Tigriopus californicus</i> |
| TCALIF_03170  | <i>SmydA-2</i>     | SmydA | <i>Tigriopus californicus</i> |
| TCALIF_04193  | <i>SmydA-2</i>     | SmydA | <i>Tigriopus californicus</i> |
| TCALIF_06488  | <i>SmydA-2</i>     | SmydA | <i>Tigriopus californicus</i> |
| TCALIF_06636  | <i>SmydA-2</i>     | SmydA | <i>Tigriopus californicus</i> |
| TCALIF_09550  | <i>SmydA-2</i>     | SmydA | <i>Tigriopus californicus</i> |
| TCALIF_09913  | <i>SmydA-2</i>     | SmydA | <i>Tigriopus californicus</i> |
| TCALIF_10822  | <i>SmydA-2</i>     | SmydA | <i>Tigriopus californicus</i> |
| TCALIF_01118  | <i>SmydA-3</i>     | SmydA | <i>Tigriopus californicus</i> |
| TCALIF_06674  | <i>SmydA-3</i>     | SmydA | <i>Tigriopus californicus</i> |
| TCALIF_07921  | <i>SmydA-3</i>     | SmydA | <i>Tigriopus californicus</i> |
| TCALIF_09525  | <i>SmydA-3</i>     | SmydA | <i>Tigriopus californicus</i> |
| TCALIF_07312  | <i>SmydA-4</i>     | SmydA | <i>Tigriopus californicus</i> |
| TCALIF_00957  | <i>SmydA-4</i>     | SmydA | <i>Tigriopus californicus</i> |
| TCALIF_01525  | <i>SmydA-4</i>     | SmydA | <i>Tigriopus californicus</i> |
| TCALIF_02597  | <i>SmydA-4</i>     | SmydA | <i>Tigriopus californicus</i> |
| TCALIF_03700  | <i>SmydA-4</i>     | SmydA | <i>Tigriopus californicus</i> |
| TCALIF_03986  | <i>SmydA-4</i>     | SmydA | <i>Tigriopus californicus</i> |
| TCALIF_05703  | <i>SmydA-4</i>     | SmydA | <i>Tigriopus californicus</i> |
| TCALIF_06000  | <i>SmydA-4</i>     | SmydA | <i>Tigriopus californicus</i> |
| TCALIF_06628  | <i>SmydA-4</i>     | SmydA | <i>Tigriopus californicus</i> |
| TCALIF_07034  | <i>SmydA-4</i>     | SmydA | <i>Tigriopus californicus</i> |
| TCALIF_07920  | <i>SmydA-4</i>     | SmydA | <i>Tigriopus californicus</i> |
| TCALIF_10848  | <i>SmydA-9</i>     | SmydA | <i>Tigriopus californicus</i> |
| TCALIF_10306  | <i>Su(var)3-9</i>  | Suv   | <i>Tigriopus californicus</i> |
| TCALIF_03934  | <i>suv</i>         | Suv   | <i>Tigriopus californicus</i> |
| TCALIF_02488  | <i>trr</i>         | Trx   | <i>Tigriopus californicus</i> |
| TCALIF_01684  | <i>trx</i>         | Trx   | <i>Tigriopus californicus</i> |
| TCALIF_13010  | <i>upSET(MLL5)</i> | -     | <i>Tigriopus californicus</i> |
| TIMCR00014387 | <i>ash1</i>        | Ash   | <i>Timema cristinae</i>       |
| TIMCR00022157 | <i>Blimp-1</i>     | PRDM  | <i>Timema cristinae</i>       |
| TIMCR00001066 | <i>egg</i>         | Suv   | <i>Timema cristinae</i>       |

|               |                   |       |                            |
|---------------|-------------------|-------|----------------------------|
| TIMCR00017665 | <i>Ez</i>         | Ez    | <i>Timema cristinae</i>    |
| TIMCR00006076 | <i>G9a</i>        | Suv   | <i>Timema cristinae</i>    |
| TIMCR00001220 | <i>Hmt4-20</i>    | -     | <i>Timema cristinae</i>    |
| TIMCR00027233 | <i>Mes-4</i>      | Ash   | <i>Timema cristinae</i>    |
| TIMCR00003489 | <i>Set1</i>       | Trx   | <i>Timema cristinae</i>    |
| TIMCR00000548 | <i>Set2</i>       | Ash   | <i>Timema cristinae</i>    |
| TIMCR00039149 | <i>Set8</i>       | -     | <i>Timema cristinae</i>    |
| TIMCR00019708 | <i>setd</i>       | SETD  | <i>Timema cristinae</i>    |
| TIMCR00010103 | <i>Smyd4-2</i>    | SMYD  | <i>Timema cristinae</i>    |
| TIMCR00035004 | <i>Smyd4-3</i>    | SMYD  | <i>Timema cristinae</i>    |
| TIMCR00030298 | <i>Smyd5</i>      | SMYD  | <i>Timema cristinae</i>    |
| TIMCR00013643 | <i>SmydA-1</i>    | SmydA | <i>Timema cristinae</i>    |
| TIMCR00013644 | <i>SmydA-1</i>    | SmydA | <i>Timema cristinae</i>    |
| TIMCR00015986 | <i>SmydA-2</i>    | SmydA | <i>Timema cristinae</i>    |
| TIMCR00022379 | <i>SmydA-2</i>    | SmydA | <i>Timema cristinae</i>    |
| TIMCR00026766 | <i>Su(var)3-9</i> | Suv   | <i>Timema cristinae</i>    |
| TIMCR00012042 | <i>Su(var)3-9</i> | Suv   | <i>Timema cristinae</i>    |
| TIMCR00023913 | <i>suv</i>        | Suv   | <i>Timema cristinae</i>    |
| TIMCR00023447 | <i>trr</i>        | Trx   | <i>Timema cristinae</i>    |
| TIMCR00035528 | <i>trx</i>        | Trx   | <i>Timema cristinae</i>    |
| TC013422      | -                 | -     | <i>Tribolium castaneum</i> |
| TC005321      | -                 | -     | <i>Tribolium castaneum</i> |
| TC000311      | <i>ash1</i>       | Ash   | <i>Tribolium castaneum</i> |
| TC014741      | <i>Blimp-1</i>    | PRDM  | <i>Tribolium castaneum</i> |
| TC006043      | <i>egg</i>        | Suv   | <i>Tribolium castaneum</i> |
| TC003094      | <i>Ez</i>         | Ez    | <i>Tribolium castaneum</i> |
| TC011127      | <i>G9a</i>        | Suv   | <i>Tribolium castaneum</i> |
| TC008337      | <i>Hmt4-20</i>    | -     | <i>Tribolium castaneum</i> |
| TC012700      | <i>Mes-4</i>      | Ash   | <i>Tribolium castaneum</i> |
| TC015826      | <i>Set1</i>       | Trx   | <i>Tribolium castaneum</i> |
| TC014310      | <i>Set2</i>       | Ash   | <i>Tribolium castaneum</i> |
| TC015766      | <i>Set8</i>       | -     | <i>Tribolium castaneum</i> |
| TC007289      | <i>setd</i>       | SETD  | <i>Tribolium castaneum</i> |
| TC007288      | <i>setd</i>       | SETD  | <i>Tribolium castaneum</i> |
| TC010888      | <i>Smyd4-3</i>    | SMYD  | <i>Tribolium castaneum</i> |
| TC003856      | <i>Smyd4-3</i>    | SMYD  | <i>Tribolium castaneum</i> |
| TC005323      | <i>Smyd4-4</i>    | SMYD  | <i>Tribolium castaneum</i> |
| TC004406      | <i>Smyd4-4</i>    | SMYD  | <i>Tribolium castaneum</i> |
| TC005322      | <i>Smyd4-4</i>    | SMYD  | <i>Tribolium castaneum</i> |
| TC000380      | <i>Smyd5</i>      | SMYD  | <i>Tribolium castaneum</i> |
| TC005992      | <i>SmydA-1</i>    | SmydA | <i>Tribolium castaneum</i> |
| TC006485      | <i>SmydA-2</i>    | SmydA | <i>Tribolium castaneum</i> |
| TC006182      | <i>SmydA-3</i>    | SmydA | <i>Tribolium castaneum</i> |
| TC006183      | <i>SmydA-3</i>    | SmydA | <i>Tribolium castaneum</i> |

|            |                    |       |                               |
|------------|--------------------|-------|-------------------------------|
| TC006184   | <i>SmydA-3</i>     | SmydA | <i>Tribolium castaneum</i>    |
| TC006159   | <i>SmydA-4</i>     | SmydA | <i>Tribolium castaneum</i>    |
| TC005638   | <i>SmydA-5</i>     | SmydA | <i>Tribolium castaneum</i>    |
| TC005637   | <i>SmydA-5</i>     | SmydA | <i>Tribolium castaneum</i>    |
| TC005968   | <i>SmydA-6</i>     | SmydA | <i>Tribolium castaneum</i>    |
| TC014347   | <i>SmydA-8</i>     | SmydA | <i>Tribolium castaneum</i>    |
| TC001103   | <i>Su(var)3-9</i>  | Suv   | <i>Tribolium castaneum</i>    |
| TC000606   | <i>trr</i>         | Trx   | <i>Tribolium castaneum</i>    |
| TC004768   | <i>trx</i>         | Trx   | <i>Tribolium castaneum</i>    |
| TC030632   | <i>upSET(MLL5)</i> | -     | <i>Tribolium castaneum</i>    |
| TPRE001038 | -                  | -     | <i>Trichogramma pretiosum</i> |
| TPRE002399 | -                  | -     | <i>Trichogramma pretiosum</i> |
| TPRE003198 | -                  | -     | <i>Trichogramma pretiosum</i> |
| TPRE003985 | -                  | -     | <i>Trichogramma pretiosum</i> |
| TPRE005031 | -                  | -     | <i>Trichogramma pretiosum</i> |
| TPRE007067 | -                  | -     | <i>Trichogramma pretiosum</i> |
| TPRE007373 | -                  | -     | <i>Trichogramma pretiosum</i> |
| TPRE009604 | -                  | -     | <i>Trichogramma pretiosum</i> |
| TPRE009654 | -                  | -     | <i>Trichogramma pretiosum</i> |
| TPRE009657 | -                  | -     | <i>Trichogramma pretiosum</i> |
| TPRE009686 | -                  | -     | <i>Trichogramma pretiosum</i> |
| TPRE010458 | -                  | -     | <i>Trichogramma pretiosum</i> |
| TPRE010584 | -                  | -     | <i>Trichogramma pretiosum</i> |
| TPRE012931 | -                  | -     | <i>Trichogramma pretiosum</i> |
| TPRE013037 | -                  | -     | <i>Trichogramma pretiosum</i> |
| TPRE013039 | -                  | -     | <i>Trichogramma pretiosum</i> |
| TPRE013040 | -                  | -     | <i>Trichogramma pretiosum</i> |
| TPRE003982 | <i>ash1</i>        | Ash   | <i>Trichogramma pretiosum</i> |
| TPRE005359 | <i>Blimp-1</i>     | PRDM  | <i>Trichogramma pretiosum</i> |
| TPRE006558 | <i>egg</i>         | Suv   | <i>Trichogramma pretiosum</i> |
| TPRE001904 | <i>Ez</i>          | Ez    | <i>Trichogramma pretiosum</i> |
| TPRE004428 | <i>G9a</i>         | Suv   | <i>Trichogramma pretiosum</i> |
| TPRE003399 | <i>Hmt4-20</i>     | -     | <i>Trichogramma pretiosum</i> |
| TPRE012907 | <i>Hmt4-20</i>     | -     | <i>Trichogramma pretiosum</i> |
| TPRE013035 | <i>Hmt4-20</i>     | -     | <i>Trichogramma pretiosum</i> |
| TPRE000203 | <i>Mes-4</i>       | Ash   | <i>Trichogramma pretiosum</i> |
| TPRE011489 | <i>Set2</i>        | Ash   | <i>Trichogramma pretiosum</i> |
| TPRE011483 | <i>Set8</i>        | -     | <i>Trichogramma pretiosum</i> |
| TPRE011484 | <i>Set8</i>        | -     | <i>Trichogramma pretiosum</i> |
| TPRE011983 | <i>setd</i>        | SETD  | <i>Trichogramma pretiosum</i> |
| TPRE012280 | <i>Smyd4-2</i>     | SMYD  | <i>Trichogramma pretiosum</i> |
| TPRE000898 | <i>Smyd4-3</i>     | SMYD  | <i>Trichogramma pretiosum</i> |
| TPRE002943 | <i>Smyd4-3</i>     | SMYD  | <i>Trichogramma pretiosum</i> |
| TPRE007294 | <i>Smyd4-3</i>     | SMYD  | <i>Trichogramma pretiosum</i> |



|                |                    |       |                               |
|----------------|--------------------|-------|-------------------------------|
| TPRE011373     | <i>Smyd4-3</i>     | SMYD  | <i>Trichogramma pretiosum</i> |
| TPRE001932     | <i>Smyd4-4</i>     | SMYD  | <i>Trichogramma pretiosum</i> |
| TPRE000669     | <i>Smyd4-4</i>     | SMYD  | <i>Trichogramma pretiosum</i> |
| TPRE003984     | <i>Smyd4-4</i>     | SMYD  | <i>Trichogramma pretiosum</i> |
| TPRE005034     | <i>Smyd4-4</i>     | SMYD  | <i>Trichogramma pretiosum</i> |
| TPRE006227     | <i>Smyd4-4</i>     | SMYD  | <i>Trichogramma pretiosum</i> |
| TPRE008172     | <i>Smyd4-4</i>     | SMYD  | <i>Trichogramma pretiosum</i> |
| TPRE008286     | <i>Smyd4-4</i>     | SMYD  | <i>Trichogramma pretiosum</i> |
| TPRE009534     | <i>Smyd4-4</i>     | SMYD  | <i>Trichogramma pretiosum</i> |
| TPRE009537     | <i>Smyd4-4</i>     | SMYD  | <i>Trichogramma pretiosum</i> |
| TPRE001074     | <i>Smyd5</i>       | SMYD  | <i>Trichogramma pretiosum</i> |
| TPRE002558     | <i>SmydA-1</i>     | SmydA | <i>Trichogramma pretiosum</i> |
| TPRE010256     | <i>SmydA-3</i>     | SmydA | <i>Trichogramma pretiosum</i> |
| TPRE011498     | <i>SmydA-8</i>     | SmydA | <i>Trichogramma pretiosum</i> |
| TPRE012312     | <i>Su(var)3-9</i>  | Suv   | <i>Trichogramma pretiosum</i> |
| TPRE001049     | <i>suv</i>         | Suv   | <i>Trichogramma pretiosum</i> |
| TPRE001671     | <i>trr</i>         | Trx   | <i>Trichogramma pretiosum</i> |
| TPRE012706     | <i>upSET(MLL5)</i> | -     | <i>Trichogramma pretiosum</i> |
| XP_011869561.1 | <i>ash1</i>        | Ash   | <i>Vollenhovia emeryi</i>     |
| XP_011875591.1 | <i>Blimp-1</i>     | PRDM  | <i>Vollenhovia emeryi</i>     |
| XP_011866930.1 | <i>egg</i>         | Suv   | <i>Vollenhovia emeryi</i>     |
| XP_011862500.1 | <i>Ez</i>          | Ez    | <i>Vollenhovia emeryi</i>     |
| XP_011879623.1 | <i>G9a</i>         | Suv   | <i>Vollenhovia emeryi</i>     |
| XP_011882170.1 | <i>Mes-4</i>       | Ash   | <i>Vollenhovia emeryi</i>     |
| XP_011878102.1 | <i>Set1</i>        | Trx   | <i>Vollenhovia emeryi</i>     |
| XP_011883473.1 | <i>Set2</i>        | Ash   | <i>Vollenhovia emeryi</i>     |
| XP_011865567.1 | <i>Set8</i>        | -     | <i>Vollenhovia emeryi</i>     |
| XP_011881916.1 | <i>setd</i>        | SETD  | <i>Vollenhovia emeryi</i>     |
| XP_011865219.1 | <i>Smyd4-2</i>     | SMYD  | <i>Vollenhovia emeryi</i>     |
| XP_011883193.1 | <i>Smyd4-3</i>     | SMYD  | <i>Vollenhovia emeryi</i>     |
| XP_011864998.1 | <i>Smyd4-3</i>     | SMYD  | <i>Vollenhovia emeryi</i>     |
| XP_011865460.1 | <i>Smyd4-3</i>     | SMYD  | <i>Vollenhovia emeryi</i>     |
| XP_011876680.1 | <i>Smyd4-4</i>     | SMYD  | <i>Vollenhovia emeryi</i>     |
| XP_011882395.1 | <i>Smyd5</i>       | SMYD  | <i>Vollenhovia emeryi</i>     |
| XP_011868637.1 | <i>SmydA-4</i>     | SmydA | <i>Vollenhovia emeryi</i>     |
| XP_011872217.1 | <i>Su(var)3-9</i>  | Suv   | <i>Vollenhovia emeryi</i>     |
| XP_011881406.1 | <i>suv</i>         | Suv   | <i>Vollenhovia emeryi</i>     |
| XP_011878029.1 | <i>trx</i>         | Trx   | <i>Vollenhovia emeryi</i>     |
| XP_011881364.1 | <i>upSET(MLL5)</i> | -     | <i>Vollenhovia emeryi</i>     |
| XP_011689252.1 | <i>ash1</i>        | Ash   | <i>Wasmannia auropunctata</i> |
| XP_011704139.1 | <i>Blimp-1</i>     | PRDM  | <i>Wasmannia auropunctata</i> |
| XP_011685467.1 | <i>egg</i>         | Suv   | <i>Wasmannia auropunctata</i> |
| XP_011685538.1 | <i>Ez</i>          | Ez    | <i>Wasmannia auropunctata</i> |
| XP_011688056.1 | <i>G9a</i>         | Suv   | <i>Wasmannia auropunctata</i> |

|                |                    |       |                                |
|----------------|--------------------|-------|--------------------------------|
| XP_011700605.1 | <i>Hmt4-20</i>     | -     | <i>Wasmannia auropunctata</i>  |
| XP_011707267.1 | <i>Mes-4</i>       | Ash   | <i>Wasmannia auropunctata</i>  |
| XP_011690355.1 | <i>Set1</i>        | Trx   | <i>Wasmannia auropunctata</i>  |
| XP_011704258.1 | <i>Set2</i>        | Ash   | <i>Wasmannia auropunctata</i>  |
| XP_011684970.1 | <i>Set8</i>        | -     | <i>Wasmannia auropunctata</i>  |
| XP_011684969.1 | <i>Set8</i>        | -     | <i>Wasmannia auropunctata</i>  |
| XP_011689690.1 | <i>setd</i>        | SETD  | <i>Wasmannia auropunctata</i>  |
| XP_011685059.1 | <i>Smyd4-2</i>     | SMYD  | <i>Wasmannia auropunctata</i>  |
| XP_011701164.1 | <i>Smyd4-2</i>     | SMYD  | <i>Wasmannia auropunctata</i>  |
| XP_011692065.1 | <i>Smyd4-3</i>     | SMYD  | <i>Wasmannia auropunctata</i>  |
| XP_011707114.1 | <i>Smyd4-3</i>     | SMYD  | <i>Wasmannia auropunctata</i>  |
| XP_011696067.1 | <i>Smyd4-4</i>     | SMYD  | <i>Wasmannia auropunctata</i>  |
| XP_011703831.1 | <i>Smyd4-4</i>     | SMYD  | <i>Wasmannia auropunctata</i>  |
| XP_011686678.1 | <i>Smyd5</i>       | SMYD  | <i>Wasmannia auropunctata</i>  |
| XP_011703429.1 | <i>SmydA-3</i>     | SmydA | <i>Wasmannia auropunctata</i>  |
| XP_011707824.1 | <i>SmydA-5</i>     | SmydA | <i>Wasmannia auropunctata</i>  |
| XP_011685806.1 | <i>suv</i>         | Suv   | <i>Wasmannia auropunctata</i>  |
| XP_011692049.1 | <i>trr</i>         | Trx   | <i>Wasmannia auropunctata</i>  |
| XP_011703242.1 | <i>trx</i>         | Trx   | <i>Wasmannia auropunctata</i>  |
| XP_011685852.1 | <i>upSET(MLL5)</i> | -     | <i>Wasmannia auropunctata</i>  |
| ZNEV_16755     | <i>ash1</i>        | Ash   | <i>Zootermopsis nevadensis</i> |
| ZNEV_08706     | <i>Blimp-1</i>     | PRDM  | <i>Zootermopsis nevadensis</i> |
| ZNEV_08064     | <i>Blimp-1</i>     | PRDM  | <i>Zootermopsis nevadensis</i> |
| ZNEV_15214     | <i>egg</i>         | Suv   | <i>Zootermopsis nevadensis</i> |
| ZNEV_02258     | <i>Ez</i>          | Ez    | <i>Zootermopsis nevadensis</i> |
| ZNEV_05631     | <i>G9a</i>         | Suv   | <i>Zootermopsis nevadensis</i> |
| ZNEV_05656     | <i>Hmt4-20</i>     | -     | <i>Zootermopsis nevadensis</i> |
| ZNEV_03918     | <i>Set1</i>        | Trx   | <i>Zootermopsis nevadensis</i> |
| ZNEV_02205     | <i>Set2</i>        | Ash   | <i>Zootermopsis nevadensis</i> |
| ZNEV_05607     | <i>Set8</i>        | -     | <i>Zootermopsis nevadensis</i> |
| ZNEV_12254     | <i>setd</i>        | SETD  | <i>Zootermopsis nevadensis</i> |
| ZNEV_05448     | <i>Smyd4-2</i>     | SMYD  | <i>Zootermopsis nevadensis</i> |
| ZNEV_08753     | <i>Smyd4-2</i>     | SMYD  | <i>Zootermopsis nevadensis</i> |
| ZNEV_00619     | <i>Smyd4-3</i>     | SMYD  | <i>Zootermopsis nevadensis</i> |
| ZNEV_01984     | <i>Smyd4-3</i>     | SMYD  | <i>Zootermopsis nevadensis</i> |
| ZNEV_06317     | <i>Smyd4-3</i>     | SMYD  | <i>Zootermopsis nevadensis</i> |
| ZNEV_01118     | <i>Smyd5</i>       | SMYD  | <i>Zootermopsis nevadensis</i> |
| ZNEV_04915     | <i>SmydA-1</i>     | SmydA | <i>Zootermopsis nevadensis</i> |
| ZNEV_06338     | <i>SmydA-2</i>     | SmydA | <i>Zootermopsis nevadensis</i> |
| ZNEV_00680     | <i>SmydA-3</i>     | SmydA | <i>Zootermopsis nevadensis</i> |
| ZNEV_04914     | <i>SmydA-4</i>     | SmydA | <i>Zootermopsis nevadensis</i> |
| ZNEV_06339     | <i>SmydA-5</i>     | SmydA | <i>Zootermopsis nevadensis</i> |
| ZNEV_00677     | <i>SmydA-6</i>     | SmydA | <i>Zootermopsis nevadensis</i> |
| ZNEV_07333     | <i>SmydA-9</i>     | SmydA | <i>Zootermopsis nevadensis</i> |

|            |                    |     |                                |
|------------|--------------------|-----|--------------------------------|
| ZNEV_00097 | <i>Su(var)3-9</i>  | Suv | <i>Zootermopsis nevadensis</i> |
| ZNEV_04699 | <i>suv</i>         | Suv | <i>Zootermopsis nevadensis</i> |
| ZNEV_09224 | <i>trr</i>         | Trx | <i>Zootermopsis nevadensis</i> |
| ZNEV_03032 | <i>trx</i>         | Trx | <i>Zootermopsis nevadensis</i> |
| ZNEV_06854 | <i>upSET(MLL5)</i> | -   | <i>Zootermopsis nevadensis</i> |

**Supplementary Table S3. Summary of *SET* genes in the 147 arthropod genomes.**

| Order          | Species                          | SMYD | SETD | PRDM | Ash | Suv | Trx | Ez   | Others | Total |
|----------------|----------------------------------|------|------|------|-----|-----|-----|------|--------|-------|
| Acariformes    | <i>Sarcoptes scabiei</i>         | 7    | 0    | 1    | 3   | 1   | 2   | 1    | 2      | 17    |
| Acariformes    | <i>Tetranychus urticae</i>       | 7    | 1    | 1    | 3   | 4   | 2   | 2    | 3      | 23    |
| Parasitiformes | <i>Ixodes scapularis</i>         | 2    | 1    | 0    | 3   | 4   | 3   | 1    | 3      | 17    |
| Parasitiformes | <i>Metaseiulus occidentalis</i>  | 1    | 1    | 1    | 1   | 5   | 3   | 1    | 3      | 16    |
| Xiphosura      | <i>Limulus polyphemus</i>        | 2    | 1    | 4    | 4   | 5   | 4   | 2    | 6      | 28    |
| Scorpiones     | <i>Centruroides exilicauda</i>   | 2    | 1    | 3    | 3   | 6   | 3   | 1    | 2      | 21    |
| Araneae        | <i>Latrodectus hesperus</i>      | 1    | 1    | 2    | 3   | 4   | 3   | 1    | 3      | 18    |
| Araneae        | <i>Loxosceles reclusa</i>        | 0    | 0(1) | 1    | 4   | 1   | 1   | 0(1) | 2      | 11    |
| Araneae        | <i>Parasteatoda tepidariorum</i> | 1    | 1    | 10   | 5   | 5   | 3   | 1    | 3      | 29    |
| Araneae        | <i>Stegodyphus mimosarum</i>     | 3    | 1    | 2    | 3   | 4   | 2   | 1    | 6      | 22    |
| Amphipoda      | <i>Hyalella azteca</i>           | 1    | 0    | 1    | 3   | 3   | 4   | 2    | 7      | 21    |
| Calanoida      | <i>Eurytemora affinis</i>        | 19   | 1    | 0    | 3   | 3   | 4   | 2    | 30     | 62    |
| Cladocera      | <i>Daphnia magna</i>             | 7    | 1    | 1    | 3   | 4   | 3   | 1    | 11     | 31    |
| Cladocera      | <i>Daphnia pulex</i>             | 6    | 1    | 2    | 3   | 5   | 3   | 2    | 10     | 32    |
| Harpacticoida  | <i>Tigriopus californicus</i>    | 14   | 0(1) | 1    | 3   | 4   | 3   | 1    | 52     | 79    |
| Collembola     | <i>Orchesella cincta</i>         | 8    | 1    | 1    | 4   | 19  | 4   | 5    | 27     | 69    |
| Diplura        | <i>Catantopus aquilonaris</i>    | 5    | 1    | 1    | 5   | 8   | 1   | 1    | 8      | 30    |
| Phthiraptera   | <i>Pediculus humanus</i>         | 6    | 1    | 1    | 3   | 4   | 3   | 1    | 9      | 28    |
| Blattodea      | <i>Blattella germanica</i>       | 4    | 2    | 2    | 4   | 3   | 2   | 0(1) | 7      | 25    |
| Coleoptera     | <i>Agrilus planipennis</i>       | 4    | 1    | 2    | 3   | 3   | 3   | 1    | 9      | 26    |
| Coleoptera     | <i>Anoplophora glabripennis</i>  | 7    | 1    | 2    | 3   | 3   | 3   | 2    | 7      | 28    |
| Coleoptera     | <i>Dendroctonus ponderosae</i>   | 5    | 1    | 1    | 3   | 3   | 3   | 1    | 12     | 29    |
| Coleoptera     | <i>Leptinotarsa decemlineata</i> | 10   | 1    | 1    | 2   | 5   | 3   | 1    | 9      | 32    |
| Coleoptera     | <i>Onthophagus taurus</i>        | 4    | 1    | 1    | 3   | 4   | 3   | 1    | 10     | 27    |
| Coleoptera     | <i>Oryctes borbonicus</i>        | 6    | 1    | 1    | 3   | 3   | 1   | 0(1) | 9      | 25    |
| Coleoptera     | <i>Tribolium castaneum</i>       | 6    | 2    | 1    | 3   | 3   | 3   | 1    | 15     | 34    |
| Diptera        | <i>Aedes aegypti</i>             | 11   | 0(1) | 2    | 3   | 2   | 3   | 2    | 11     | 35    |
| Diptera        | <i>Aedes albopictus</i>          | 12   | 0(1) | 2    | 4   | 3   | 4   | 1    | 12     | 39    |
| Diptera        | <i>Anopheles albimanus</i>       | 7    | 1    | 1    | 3   | 3   | 3   | 1    | 11     | 30    |
| Diptera        | <i>Anopheles arabiensis</i>      | 15   | 1    | 1    | 3   | 3   | 3   | 1    | 10     | 37    |
| Diptera        | <i>Anopheles atroparvus</i>      | 6    | 1    | 2    | 3   | 2   | 3   | 1    | 8      | 26    |
| Diptera        | <i>Anopheles christyi</i>        | 8    | 1    | 1    | 3   | 3   | 3   | 1    | 9      | 29    |
| Diptera        | <i>Anopheles coluzzii</i>        | 15   | 1    | 1    | 3   | 3   | 3   | 1    | 8      | 35    |
| Diptera        | <i>Anopheles culicifacies</i>    | 6    | 1    | 1    | 3   | 3   | 3   | 1    | 10     | 28    |
| Diptera        | <i>Anopheles darlingi</i>        | 7    | 0(1) | 1    | 3   | 3   | 3   | 0(1) | 11     | 30    |

|         |                                  |    |      |      |    |   |   |      |    |    |
|---------|----------------------------------|----|------|------|----|---|---|------|----|----|
| Diptera | <i>Anopheles dirus</i>           | 11 | 0(1) | 1    | 3  | 3 | 3 | 1    | 9  | 32 |
| Diptera | <i>Anopheles epiroticus</i>      | 8  | 1    | 1    | 3  | 3 | 3 | 1    | 9  | 29 |
| Diptera | <i>Anopheles farauti</i>         | 5  | 1    | 1    | 3  | 3 | 3 | 1    | 7  | 24 |
| Diptera | <i>Anopheles funestus</i>        | 8  | 0(1) | 1    | 3  | 3 | 3 | 1    | 9  | 29 |
| Diptera | <i>Anopheles gambiae</i>         | 19 | 1    | 1    | 3  | 3 | 3 | 1    | 10 | 41 |
| Diptera | <i>Anopheles maculatus</i>       | 7  | 0(1) | 2    | 3  | 3 | 3 | 1    | 9  | 29 |
| Diptera | <i>Anopheles melas</i>           | 15 | 1    | 1    | 1  | 3 | 3 | 1    | 9  | 34 |
| Diptera | <i>Anopheles merus</i>           | 15 | 1    | 1    | 3  | 3 | 2 | 0(1) | 11 | 36 |
| Diptera | <i>Anopheles minimus</i>         | 9  | 1    | 1    | 3  | 3 | 3 | 1    | 9  | 30 |
| Diptera | <i>Anopheles quadriannulatus</i> | 15 | 0(1) | 1    | 3  | 3 | 3 | 1    | 10 | 37 |
| Diptera | <i>Anopheles sinensis</i>        | 6  | 1    | 1    | 2  | 2 | 3 | 1    | 4  | 20 |
| Diptera | <i>Anopheles stephensi</i>       | 8  | 1    | 1    | 3  | 3 | 3 | 1    | 11 | 31 |
| Diptera | <i>Bactrocera cucurbitae</i>     | 5  | 1    | 1    | 3  | 4 | 3 | 1    | 13 | 31 |
| Diptera | <i>Bactrocera dorsalis</i>       | 4  | 1    | 2    | 4  | 4 | 6 | 2    | 22 | 45 |
| Diptera | <i>Ceratina calcarata</i>        | 5  | 1    | 0(1) | 2  | 4 | 3 | 1    | 11 | 28 |
| Diptera | <i>Ceratitis capitata</i>        | 5  | 1    | 1    | 3  | 3 | 3 | 1    | 14 | 31 |
| Diptera | <i>Culex quinquefasciatus</i>    | 40 | 1    | 1    | 13 | 2 | 9 | 1    | 14 | 81 |
| Diptera | <i>Drosophila ananassae</i>      | 5  | 0(1) | 1    | 3  | 4 | 3 | 1    | 12 | 30 |
| Diptera | <i>Drosophila biarmipes</i>      | 5  | 1    | 1    | 4  | 4 | 3 | 1    | 9  | 28 |
| Diptera | <i>Drosophila bipectinata</i>    | 5  | 1    | 1    | 3  | 4 | 3 | 1    | 10 | 28 |
| Diptera | <i>Drosophila elegans</i>        | 5  | 1    | 1    | 3  | 3 | 3 | 1    | 9  | 26 |
| Diptera | <i>Drosophila erecta</i>         | 5  | 1    | 1    | 3  | 3 | 3 | 1    | 13 | 30 |
| Diptera | <i>Drosophila eugracilis</i>     | 4  | 0(1) | 1    | 3  | 3 | 3 | 1    | 11 | 27 |
| Diptera | <i>Drosophila ficusphila</i>     | 5  | 1    | 1    | 3  | 3 | 3 | 1    | 8  | 25 |
| Diptera | <i>Drosophila grimshawi</i>      | 5  | 1    | 1    | 3  | 3 | 3 | 1    | 12 | 29 |
| Diptera | <i>Drosophila kikkawai</i>       | 5  | 1    | 1    | 3  | 4 | 3 | 1    | 10 | 28 |
| Diptera | <i>Drosophila melanogaster</i>   | 5  | 1    | 1    | 3  | 4 | 3 | 1    | 12 | 30 |
| Diptera | <i>Drosophila miranda</i>        | 5  | 1    | 0(1) | 3  | 3 | 3 | 1    | 11 | 28 |
| Diptera | <i>Drosophila mojavensis</i>     | 5  | 1    | 0    | 4  | 3 | 2 | 1    | 14 | 30 |
| Diptera | <i>Drosophila persimilis</i>     | 5  | 1    | 1    | 4  | 5 | 3 | 1    | 11 | 31 |
| Diptera | <i>Drosophila pseudoobscura</i>  | 5  | 1    | 1    | 4  | 4 | 3 | 1    | 11 | 30 |
| Diptera | <i>Drosophila rhopaloea</i>      | 5  | 1    | 1    | 3  | 5 | 2 | 1    | 8  | 26 |
| Diptera | <i>Drosophila sechellia</i>      | 5  | 1    | 1    | 3  | 4 | 2 | 1    | 11 | 28 |
| Diptera | <i>Drosophila simulans</i>       | 5  | 1    | 0(1) | 3  | 3 | 3 | 1    | 9  | 26 |
| Diptera | <i>Drosophila sukuzii</i>        | 5  | 1    | 1    | 3  | 4 | 4 | 1    | 10 | 29 |
| Diptera | <i>Drosophila takahashii</i>     | 4  | 1    | 1    | 3  | 4 | 3 | 1    | 7  | 24 |
| Diptera | <i>Drosophila virilis</i>        | 5  | 1    | 1    | 4  | 4 | 4 | 1    | 12 | 32 |
| Diptera | <i>Drosophila willistoni</i>     | 4  | 1    | 1    | 3  | 5 | 4 | 1    | 11 | 30 |
| Diptera | <i>Drosophila yakuba</i>         | 5  | 1    | 1    | 3  | 4 | 3 | 1    | 11 | 29 |
| Diptera | <i>Glossina austeni</i>          | 4  | 1    | 1    | 3  | 2 | 3 | 1    | 14 | 29 |
| Diptera | <i>Glossina brevipalpis</i>      | 4  | 1    | 1    | 4  | 5 | 3 | 1    | 14 | 33 |
| Diptera | <i>Glossina fuscipes</i>         | 5  | 1    | 1    | 3  | 5 | 4 | 0(1) | 15 | 35 |
| Diptera | <i>Glossina morsitans</i>        | 4  | 1    | 1    | 3  | 4 | 3 | 1    | 12 | 29 |
| Diptera | <i>Glossina pallidipes</i>       | 5  | 1    | 1    | 3  | 4 | 3 | 0(1) | 14 | 32 |

|               |                                |    |      |      |      |      |   |      |    |    |
|---------------|--------------------------------|----|------|------|------|------|---|------|----|----|
| Diptera       | <i>Glossina palpalis</i>       | 5  | 1    | 1    | 3    | 4    | 3 | 1    | 13 | 31 |
| Diptera       | <i>Lucilia cuprina</i>         | 5  | 1    | 1    | 3    | 3    | 3 | 1    | 12 | 29 |
| Diptera       | <i>Lutzomyia longipalpis</i>   | 6  | 1    | 1    | 3    | 3    | 2 | 1    | 10 | 27 |
| Diptera       | <i>Mayetiola destructor</i>    | 13 | 0(1) | 1    | 9    | 6    | 4 | 1    | 25 | 60 |
| Diptera       | <i>Megaselia scalaris</i>      | 2  | 0(1) | 1    | 3    | 2    | 1 | 0(1) | 5  | 16 |
| Diptera       | <i>Musca domestica</i>         | 5  | 1    | 0(1) | 3    | 3    | 3 | 1    | 20 | 37 |
| Diptera       | <i>Phlebotomus papatasi</i>    | 5  | 1    | 0(1) | 4    | 3    | 3 | 1    | 6  | 24 |
| Diptera       | <i>Stomoxys calcitrans</i>     | 5  | 1    | 1    | 3    | 2    | 3 | 1    | 16 | 32 |
| Diptera       | <i>Belgica antarctica</i>      | 27 | 2    | 1    | 3    | 5    | 4 | 0(1) | 12 | 55 |
| Ephemeroptera | <i>Ephemera danica</i>         | 18 | 1    | 1    | 2(1) | 1(1) | 2 | 1    | 12 | 40 |
| Hemiptera     | <i>Acyrtosiphon pisum</i>      | 14 | 0(1) | 0    | 2    | 10   | 4 | 1    | 31 | 63 |
| Hemiptera     | <i>Cimex lectularius</i>       | 4  | 1    | 2    | 3    | 5    | 3 | 1    | 5  | 24 |
| Hemiptera     | <i>Diaphorina citri</i>        | 3  | 0(1) | 1    | 4    | 4    | 3 | 2    | 11 | 29 |
| Hemiptera     | <i>Gerris buenoi</i>           | 6  | 1    | 1    | 3    | 3    | 3 | 1    | 8  | 26 |
| Hemiptera     | <i>Halyomorpha halys</i>       | 5  | 1    | 1    | 2    | 5    | 3 | 1    | 8  | 26 |
| Hemiptera     | <i>Homalodisca vitripennis</i> | 5  | 2    | 2    | 2    | 5    | 4 | 1    | 8  | 29 |
| Hemiptera     | <i>Nilaparvata lugens</i>      | 4  | 1    | 6    | 2    | 4    | 4 | 1    | 7  | 29 |
| Hemiptera     | <i>Oncopeltus fasciatus</i>    | 6  | 1    | 0(1) | 2    | 5    | 4 | 1    | 7  | 27 |
| Hemiptera     | <i>Pachypsylla venusta</i>     | 1  | 1    | 2    | 2    | 3    | 1 | 1    | 9  | 20 |
| Hemiptera     | <i>Rhodnius prolixus</i>       | 6  | 1    | 0(1) | 2    | 2    | 2 | 1    | 6  | 21 |
| Hymenoptera   | <i>Acromyrmex echinator</i>    | 7  | 2    | 1    | 3    | 3    | 3 | 1    | 7  | 27 |
| Hymenoptera   | <i>Apis dorsata</i>            | 6  | 0(1) | 1    | 3    | 3    | 1 | 1    | 7  | 23 |
| Hymenoptera   | <i>Apis florea</i>             | 7  | 1    | 1    | 3    | 3    | 2 | 0(1) | 8  | 26 |
| Hymenoptera   | <i>Apis mellifera</i>          | 7  | 1    | 1    | 3    | 4    | 3 | 1    | 9  | 29 |
| Hymenoptera   | <i>Athalia rosae</i>           | 7  | 1    | 2    | 2    | 3    | 2 | 1    | 8  | 26 |
| Hymenoptera   | <i>Atta cephalotes</i>         | 8  | 1    | 1    | 3    | 4    | 3 | 1    | 7  | 28 |
| Hymenoptera   | <i>Bombus impatiens</i>        | 7  | 1    | 1    | 3    | 4    | 3 | 1    | 10 | 30 |
| Hymenoptera   | <i>Bombus terrestris</i>       | 8  | 1    | 1    | 3    | 4    | 3 | 1    | 8  | 29 |
| Hymenoptera   | <i>Camponotus floridanus</i>   | 8  | 2    | 1    | 2    | 3    | 2 | 1    | 8  | 27 |
| Hymenoptera   | <i>Cardiocondyla obscurior</i> | 7  | 2    | 1    | 3    | 4    | 3 | 1    | 10 | 31 |
| Hymenoptera   | <i>Cephus cinctus</i>          | 6  | 1    | 1    | 0(2) | 3    | 2 | 0(1) | 6  | 22 |
| Hymenoptera   | <i>Cerapachys biroi</i>        | 5  | 1    | 1    | 0(2) | 3    | 3 | 1    | 6  | 22 |
| Hymenoptera   | <i>Ceratosolen solmsi</i>      | 8  | 1    | 1    | 3    | 3    | 2 | 1    | 9  | 28 |
| Hymenoptera   | <i>Copidosoma floridanum</i>   | 17 | 1    | 1    | 3    | 4    | 2 | 1    | 16 | 45 |
| Hymenoptera   | <i>Dufourea novaeangliae</i>   | 7  | 2    | 1    | 3    | 4    | 3 | 1    | 7  | 28 |
| Hymenoptera   | <i>Eufriesea mexicana</i>      | 6  | 2    | 1    | 3    | 4    | 3 | 1    | 8  | 28 |
| Hymenoptera   | <i>Fopius arisanus</i>         | 9  | 1    | 1    | 3    | 4    | 1 | 1    | 9  | 29 |
| Hymenoptera   | <i>Habropoda laboriosa</i>     | 8  | 2    | 1    | 3    | 4    | 3 | 1    | 8  | 30 |
| Hymenoptera   | <i>Harpegnathos saltator</i>   | 8  | 2    | 0    | 1    | 2    | 1 | 1    | 8  | 23 |
| Hymenoptera   | <i>Linepithema humile</i>      | 7  | 2    | 1    | 3    | 4    | 3 | 1    | 8  | 29 |
| Hymenoptera   | <i>Megachile rotundata</i>     | 7  | 2    | 1    | 3    | 3    | 3 | 1    | 8  | 28 |
| Hymenoptera   | <i>Melipona quadrifasciata</i> | 7  | 2    | 1    | 3    | 4    | 3 | 1    | 8  | 29 |
| Hymenoptera   | <i>Microplitis demolitor</i>   | 18 | 1    | 1    | 3    | 4    | 3 | 2    | 8  | 40 |
| Hymenoptera   | <i>Monomorium pharaonis</i>    | 6  | 1    | 1    | 2    | 3    | 2 | 1    | 5  | 21 |

|               |                                   |    |      |      |      |      |      |      |    |    |
|---------------|-----------------------------------|----|------|------|------|------|------|------|----|----|
| Hymenoptera   | <i>Nasonia vitripennis</i>        | 17 | 1    | 1    | 3    | 4    | 2    | 1    | 23 | 52 |
| Hymenoptera   | <i>Orussus abietinus</i>          | 11 | 2    | 1    | 2    | 3    | 3    | 1    | 7  | 30 |
| Hymenoptera   | <i>Pogonomyrmex barbatus</i>      | 5  | 2    | 0(1) | 2    | 4    | 3    | 1    | 8  | 26 |
| Hymenoptera   | <i>Polistes dominula</i>          | 6  | 1    | 1    | 1    | 4    | 2    | 1    | 6  | 22 |
| Hymenoptera   | <i>Solenopsis invicta</i>         | 2  | 1    | 0(1) | 3    | 3    | 3    | 1    | 7  | 21 |
| Hymenoptera   | <i>Trichogramma pretiosum</i>     | 15 | 1    | 1    | 3    | 4    | 1    | 1    | 26 | 52 |
| Hymenoptera   | <i>Vollenhovia emeryi</i>         | 6  | 1    | 1    | 3    | 4    | 2    | 1    | 3  | 21 |
| Hymenoptera   | <i>Wasmannia auropunctata</i>     | 7  | 1    | 1    | 3    | 3    | 3    | 1    | 6  | 25 |
| Hymenoptera   | <i>Lasioglossum albipes</i>       | 9  | 1    | 1    | 3    | 3    | 3    | 1    | 8  | 29 |
| Isoptera      | <i>Zootermopsis nevadensis</i>    | 6  | 1    | 2    | 2    | 4    | 3    | 1    | 10 | 29 |
| Lepidoptera   | <i>Bombyx mori</i>                | 4  | 2    | 1    | 3    | 4    | 3    | 1    | 8  | 26 |
| Lepidoptera   | <i>Danaus plexippus</i>           | 5  | 1    | 1    | 3    | 5    | 3    | 1    | 10 | 29 |
| Lepidoptera   | <i>Heliconius melpomene</i>       | 5  | 0(1) | 1    | 2    | 4    | 3    | 1    | 6  | 23 |
| Lepidoptera   | <i>Papilio polytes</i>            | 6  | 1    | 1    | 3    | 2    | 2    | 0(1) | 11 | 27 |
| Lepidoptera   | <i>Papilio xuthus</i>             | 6  | 1    | 1    | 3    | 4    | 2    | 1    | 9  | 27 |
| Lepidoptera   | <i>Plutella xylostella</i>        | 5  | 4    | 1    | 4    | 5    | 6    | 0    | 13 | 38 |
| Lepidoptera   | <i>Lerema accius</i>              | 4  | 1    | 2    | 3    | 3    | 3    | 1    | 10 | 27 |
| Lepidoptera   | <i>Melitaea cinxia</i>            | 5  | 1    | 1    | 3    | 1    | 0(3) | 0(1) | 8  | 23 |
| Lepidoptera   | <i>Manduca sexta</i>              | 6  | 2    | 7    | 7    | 5    | 5    | 2    | 29 | 63 |
| Odonata       | <i>Ladona fulva</i>               | 3  | 2    | 2    | 2(1) | 3(1) | 3    | 1    | 9  | 27 |
| Orthoptera    | <i>Locusta migratoria</i>         | 9  | 1    | 1    | 3    | 4    | 3    | 1    | 7  | 29 |
| Phasmatoptera | <i>Timema cristinae</i>           | 3  | 1    | 1    | 3    | 5    | 3    | 1    | 6  | 23 |
| Thysanoptera  | <i>Frankliniella occidentalis</i> | 6  | 2    | 8    | 3    | 5    | 3    | 1    | 21 | 49 |
| Trichoptera   | <i>Limnephilus lunatus</i>        | 3  | 1    | 0    | 0(2) | 3    | 2    | 1    | 6  | 18 |

Note: The numbers in parenthesis indicates the number of the genes which are not present in the official gene sets. The species selected in the Figure 2A are highlighted in red. Others, arthropod-specific and unclassified *SET* genes

#### Supplementary Table S4. Primers used in the study.

##### Recombinant protein expression

|                 |                                                         |
|-----------------|---------------------------------------------------------|
| L06-SP6-Kozak-F | TATTTAGGTGACACTATAGAACAGACCACCAT<br>GGCCAGCAGGGGCTTCAAA |
| L06-his-R       | TTAATGATGATGATGATGATGGTCATCATTTA<br>ATTCTGTGGCA         |

##### RNA interference

|                |                      |
|----------------|----------------------|
| RNAi-GFP-F     | CACAAGTTCAGCGTGTCCG  |
| RNAi-GFP-R     | GTTACCTTGATGCCGTTC   |
| RNAi-SmydA-2-F | CGCCCTGGGCCCAAGATCT  |
| RNAi-SmydA-2-R | CCAGCACGGCGATGCGGAAG |

##### Probe synthesis

|                |                         |
|----------------|-------------------------|
| FISH-SmydA-2-F | GACCGCCACTCCGACAGCAAGAT |
| FISH-SmydA-2-R | ACATGCCTGGTTCCAGAACATCA |

##### qPCR

|                     |                     |
|---------------------|---------------------|
| RP49-F (reference ) | CCATAGTTGCCTGACTCCC |
|---------------------|---------------------|



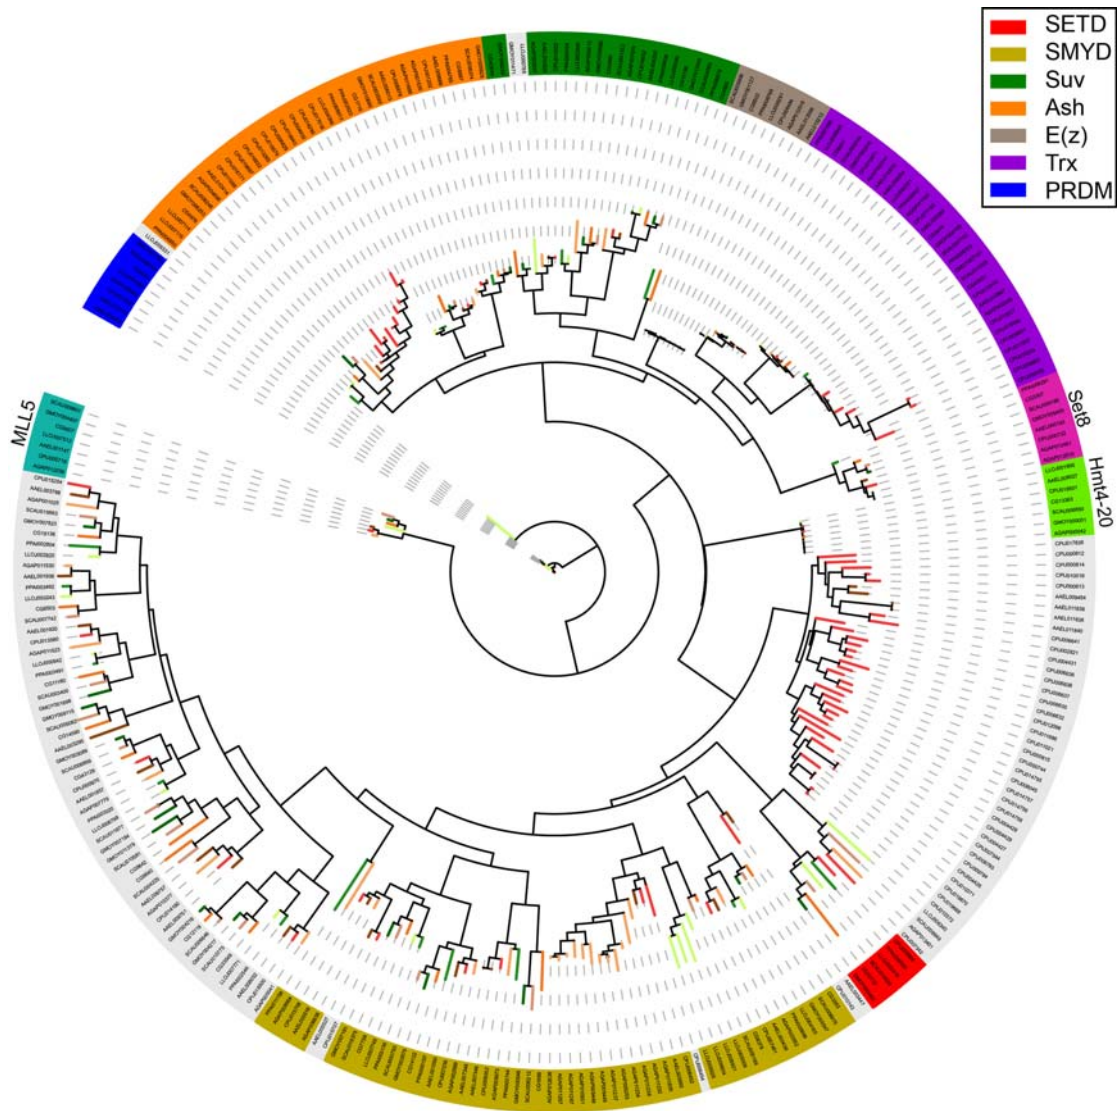

**Supplementary Figure S2. Phylogenetic analysis of the *SET* genes in Diptera using Maximum-likelihood inferences with PhyML.** The *SET* gene families labeled with different colors are shown in the exterior circle of the phylogenetic tree. The insect species involved are represented with different colors of the external branch. The representative species are selected to improve clarity.



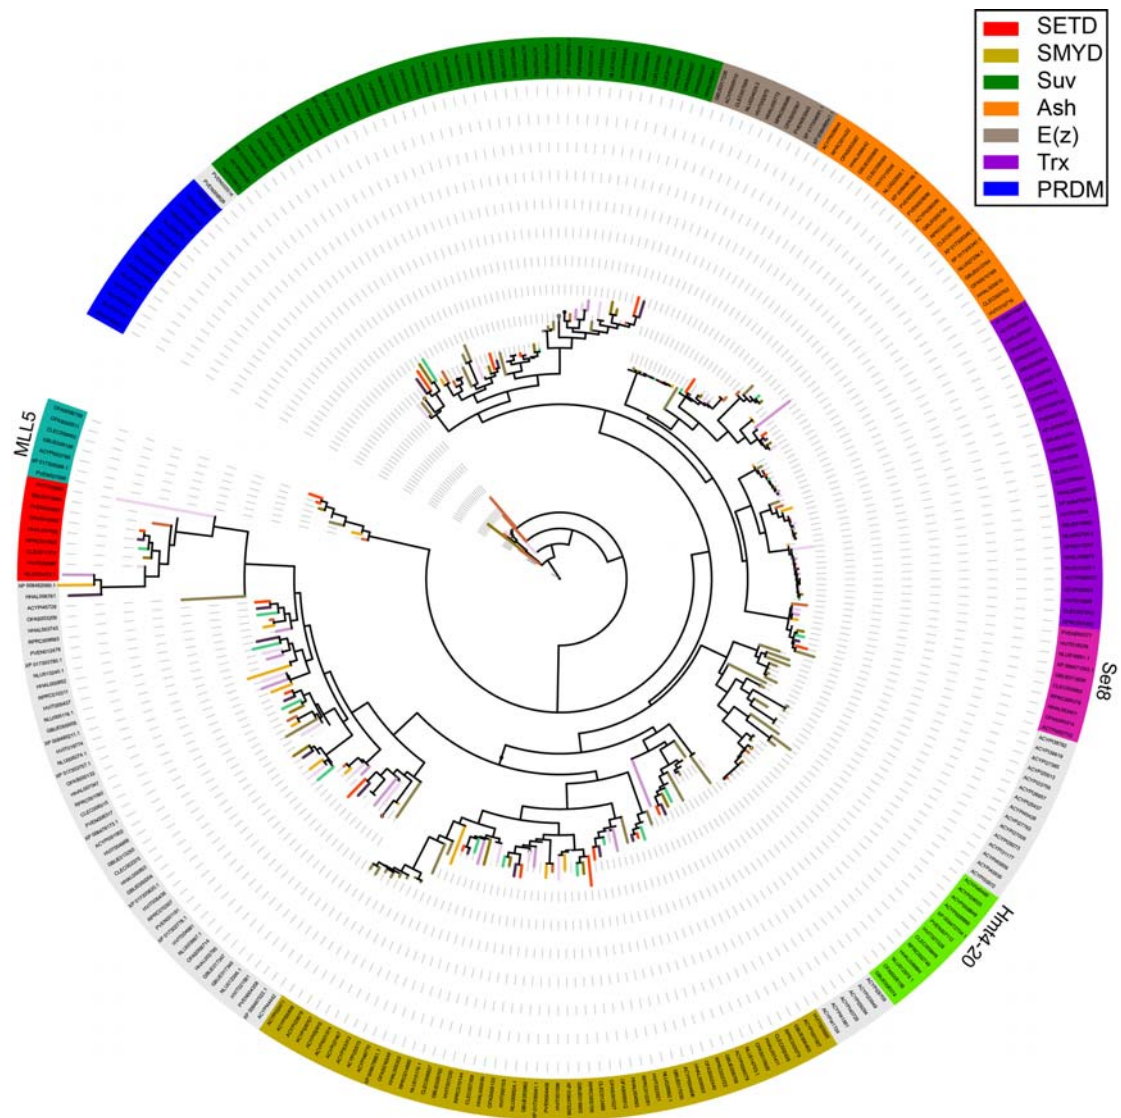

**Supplementary Figure S3. Phylogenetic analysis of the *SET* genes in Hemiptera using Maximum-likelihood inferences with PhyML.** The *SET* gene families labeled with different colors are shown in the exterior circle of the phylogenetic tree. The insect species involved are represented with different colors of the external branch.

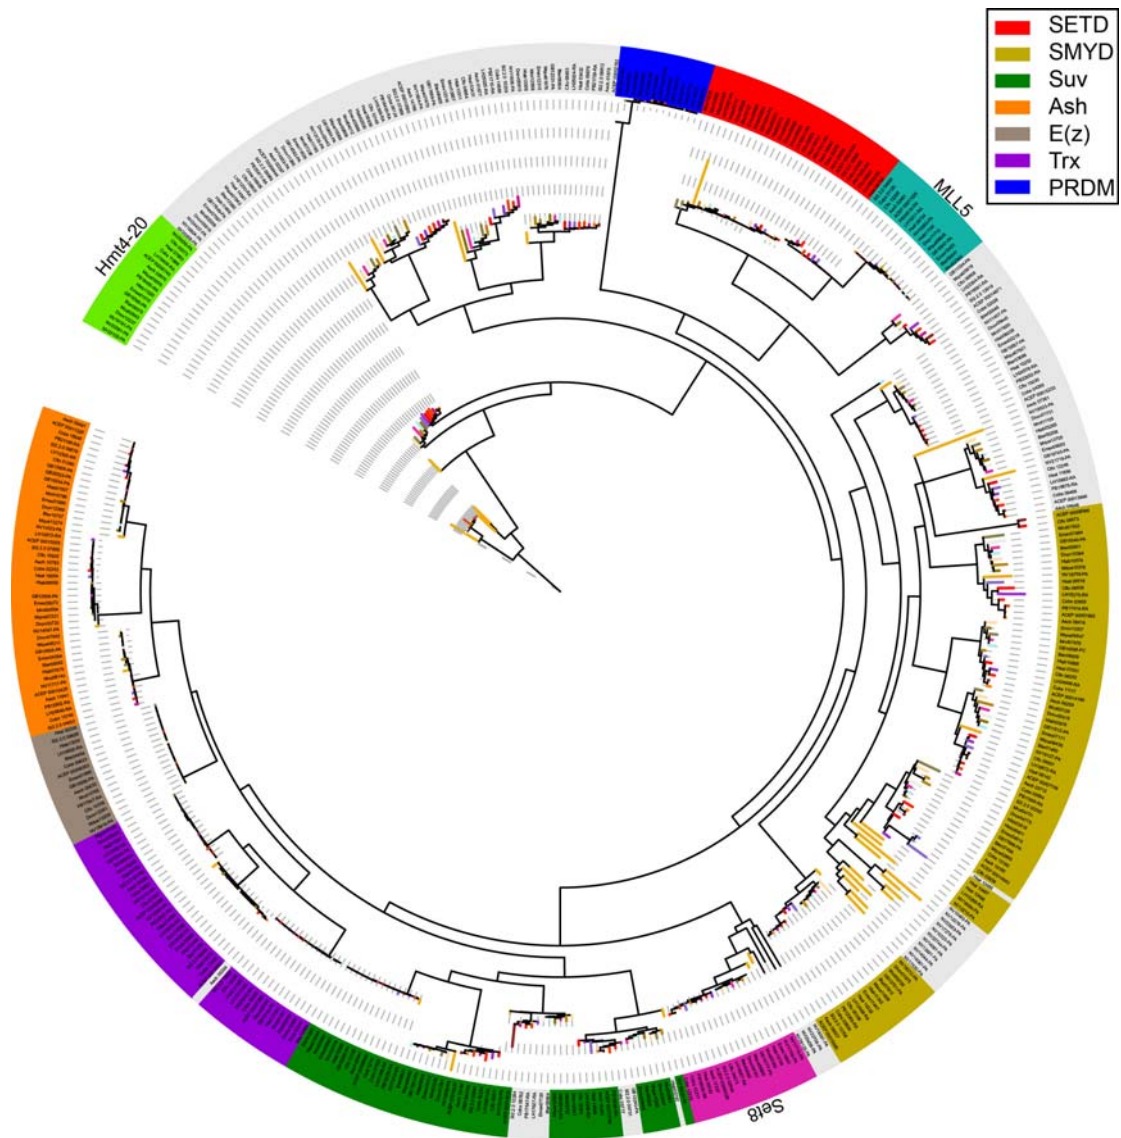

**Supplementary Figure S4. Phylogenetic analysis of the *SET* genes in Hymenoptera using Maximum-likelihood inferences with PhyML.** The *SET* gene families labeled with different colors are shown in the exterior circle of the phylogenetic tree. The insect species involved are represented with different colors of the external branch. The representative species are selected to improve clarity.

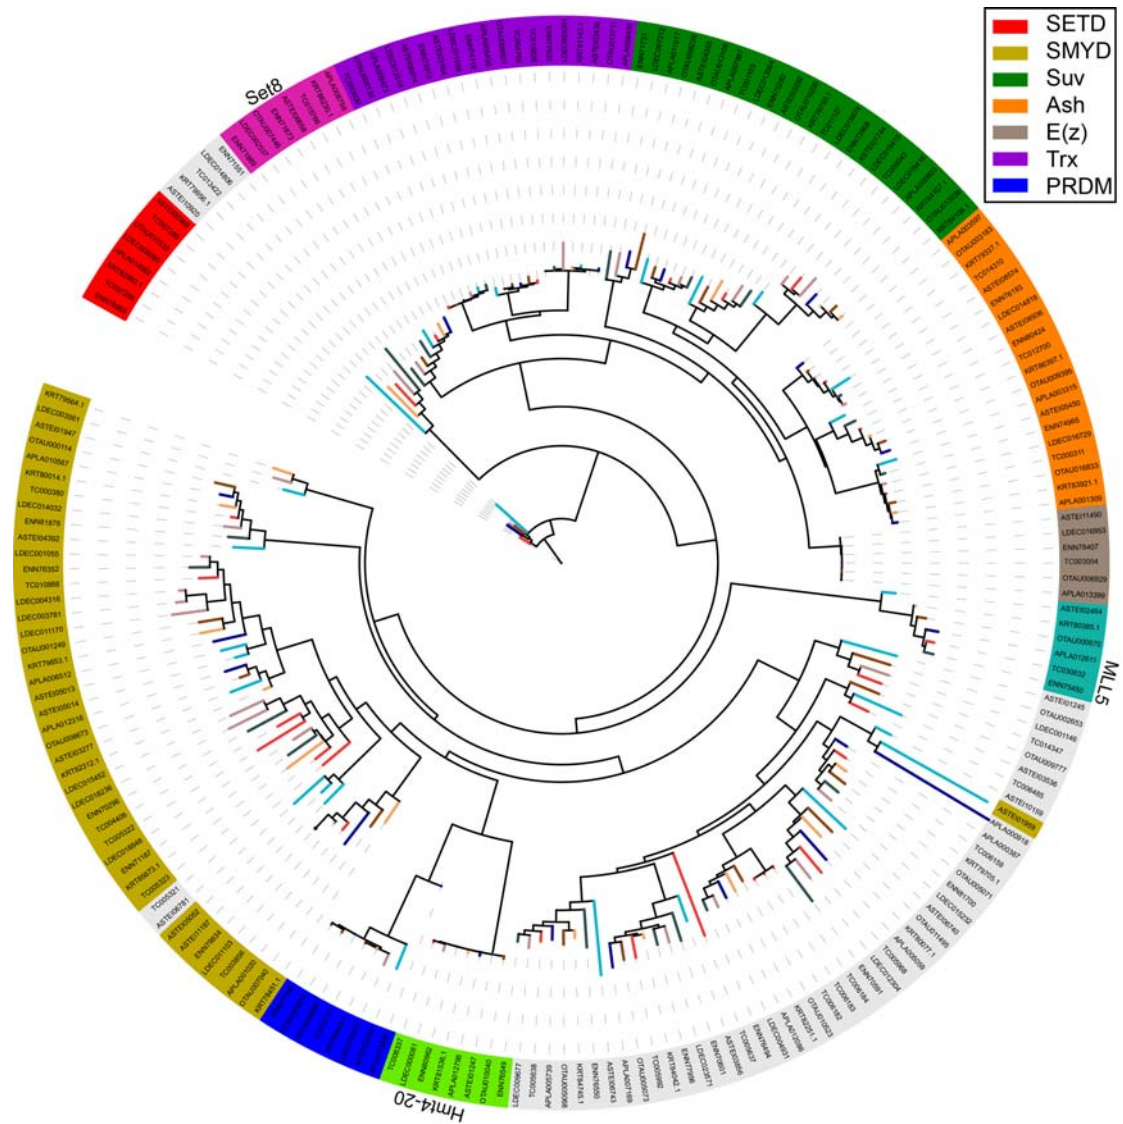

**Supplementary Figure S5. Phylogenetic analysis of the *SET* genes in Coleopteran using Maximum-likelihood inferences with PhyML.** The *SET* gene families labeled with different colors are shown in the exterior circle of the phylogenetic tree. The insect species involved are represented with different colors of the external branch.

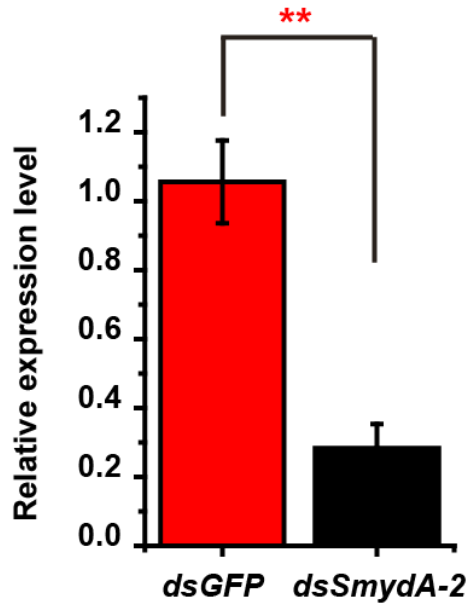

**Supplementary Figure S6. Effects of RNA interference of the mRNA expression levels of *SmydA-2* in locust brains.** The locusts are injected with double-stranded RNAs into the second ventral segment of the abdomen. Due to the systemic RNA interference in locusts, the brain, which is spatially distant from the abdomen, is used in qPCR assays to guarantee effective expression knockdown. qPCR data are shown as the mean  $\pm$  SEM (n = 6). \*\*P < 0.01.

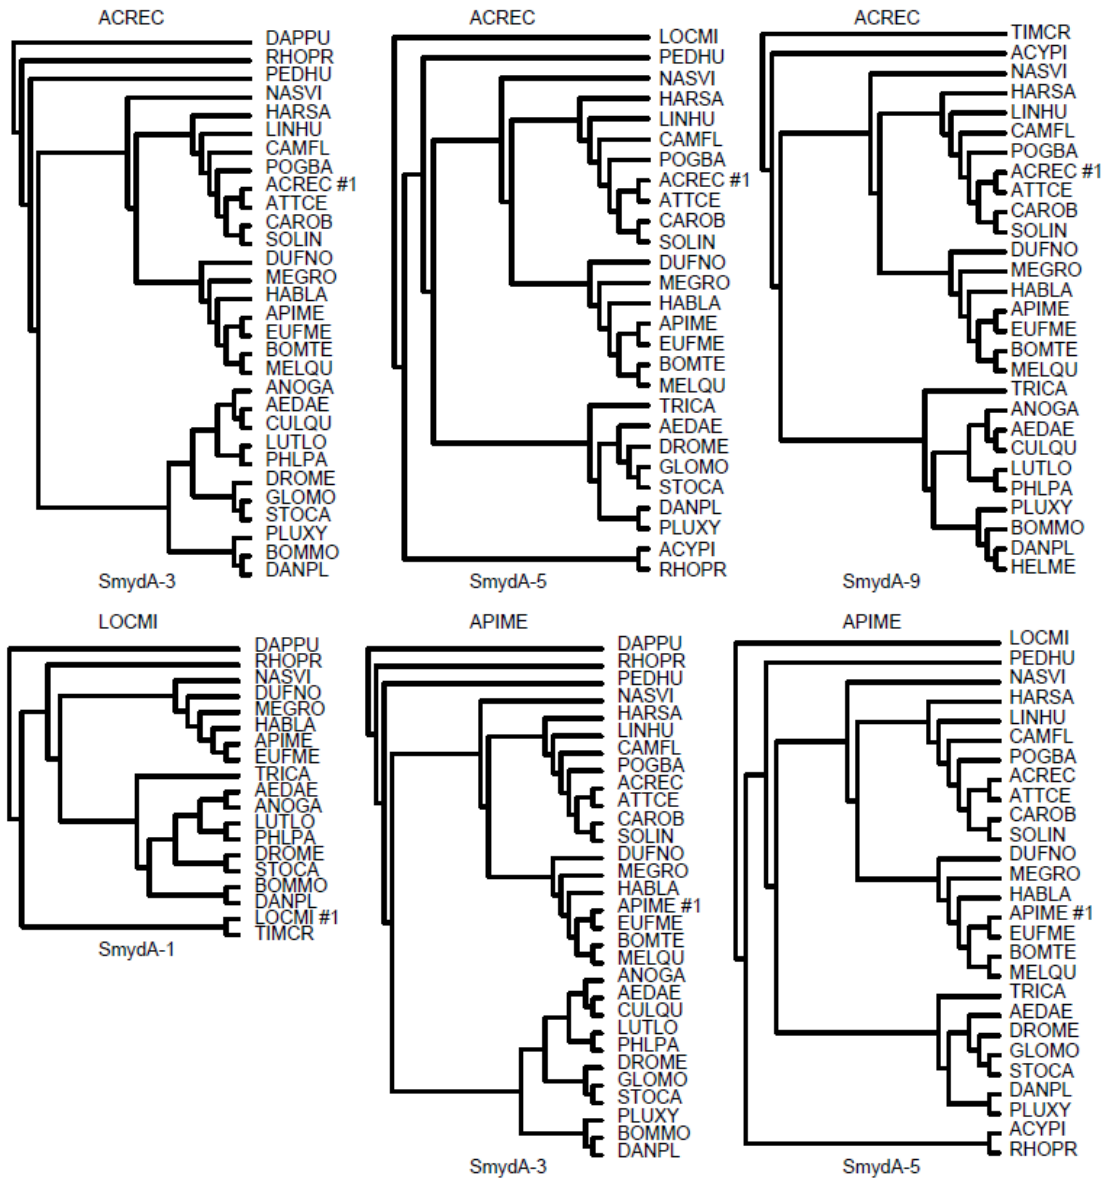

**Supplementary Figure S7. Tree topology and branch labeling for tests of selection on *SET* genes.** APIME, *Apis mellifera*; ACREC, *Acromyrmex echinator*; LOCMI, *Locusta migratoria*. Supplementary Table S1 presents the abbreviation of insect species.
